# Supplementary material for: Integrated transcriptomic and proteomic profiling reveals the key molecular signatures of brain endothelial reperfusion injury
Source: Research Square preprint supplement (doi:10.21203/rs.3.rs-2216319/v1), 2022-11-02
Supplement: Supplementary file 1 [file 58ae5571f78a2037ae2c50cb.xlsx]

## Sheet: OGD vs. NC
KEGG_A_class	KEGG_B_class	Pathway	NC-vs-OGD (862)	All (8193)	Pvalue	Qvalue	Pathway ID	Genes	KOs
Genetic Information Processing	Translation	Ribosome	102	173	2.83775e-56	7.86058e-54	ko03010	XLOC_001904;ENSG00000106591;ENSG00000214026;ENSG00000143314;ENSG00000125691;ENSG00000239789;ENSG00000262814;ENSG00000163584;ENSG00000140988;ENSG00000130255;ENSG00000182899;ENSG00000181991;ENSG00000144713;ENSG00000165502;ENSG00000198242;ENSG00000197728;ENSG00000197728;ENSG00000130312;ENSG00000116898;ENSG00000122140;ENSG00000114391;ENSG00000171421;ENSG00000105193;ENSG00000109475;ENSG00000168028;ENS…	K02980+K02911+K02892+K02895+K02894+K02961+K02935+K02891+K02981+K02920+K02917+K02948+K02912+K02929+K02893+K02976+K02976+K02914+K02956+K02967+K02896+K02919+K02960+K02915+K02998+K02937+K02868+K02997+K02901+K02898+K02984+K02898+K02955+K02886+K02929+K02929+K02970+K02889+K02921+K02872+K02910+K02964+K02990+K02983+K02951+K02991+K02973+K02880+K02926+K02902+K02927+K02940+K02980+K02971+K02979+K02934+K02947+…
Human Diseases	Substance dependence	Alcoholism	143	577	1.5298e-24	2.11877e-22	ko05034	ENSG00000184825;ENSG00000128271;ENSG00000161509;ENSG00000174775;ENSG00000167083;ENSG00000203812;ENSG00000203812;ENSG00000197061;ENSG00000197061;ENSG00000197061;ENSG00000197061;ENSG00000197061;ENSG00000197061;ENSG00000197061;ENSG00000197061;ENSG00000197061;ENSG00000197061;ENSG00000197061;ENSG00000197061;ENSG00000197061;ENSG00000197061;ENSG00000203811;ENSG00000203811;ENSG00000203811;ENSG00000124529…	K11251+K04266+K05211+K02833+K04549+K11251+K11251+K11254+K11254+K11254+K11254+K11254+K11254+K11254+K11254+K11254+K11254+K11254+K11254+K11254+K11254+K11253+K11253+K11253+K11254+K11254+K11254+K11254+K11254+K11254+K11254+K11254+K11254+K11254+K11254+K11254+K11254+K11254+K11251+K11251+K04542+K11252+K11252+K11252+K11252+K11252+K06269+K11253+K11253+K11253+K11253+K11253+K11253+K11253+K11253+K11253+K11253+…
Metabolism	Energy metabolism	Oxidative phosphorylation	67	170	1.57626e-23	1.45541e-21	ko00190	ENSG00000164919;ENSG00000169020;ENSG00000125356;ENSG00000167283;ENSG00000127184;ENSG00000164258;ENSG00000138495;ENSG00000099624;ENSG00000135940;ENSG00000131143;ENSG00000119421;ENSG00000189043;ENSG00000151366;ENSG00000151366;ENSG00000090266;ENSG00000159199;ENSG00000164405;ENSG00000099795;ENSG00000176340;ENSG00000126267;ENSG00000166136;ENSG00000183648;ENSG00000109390;ENSG00000170516;ENSG00000004779…	K02268+K02129+K03945+K02140+K02272+K03937+K02260+K02134+K02265+K02263+K03952+K03948+K03968+K03968+K03958+K02128+K00418+K03963+K02273+K02267+K03964+K03957+K03967+K02271+K03955+K03942+K02264+K11352+K03940+K03965+K03962+K03936+K03941+K03946+K03950+K00419+K02271+K00413+K03938+K02153+K00416+K00416+K03661+K11353+K03951+K02146+K11351+K00420+K00411+K02138+K03959+K02135+K03939+K02151+K02130+K03948+K03947+…
Human Diseases	Neurodegenerative diseases	Parkinson's disease	63	165	2.57116e-21	1.78053e-19	ko05012	ENSG00000164919;ENSG00000125356;ENSG00000127184;ENSG00000128271;ENSG00000164258;ENSG00000099624;ENSG00000135940;ENSG00000131143;ENSG00000119421;ENSG00000189043;ENSG00000151366;ENSG00000151366;ENSG00000090266;ENSG00000159199;ENSG00000188906;ENSG00000164405;ENSG00000099795;ENSG00000176340;ENSG00000126267;ENSG00000166136;ENSG00000183648;ENSG00000116288;ENSG00000109390;ENSG00000170516;ENSG00000004779…	K02268+K03945+K02272+K04266+K03937+K02134+K02265+K02263+K03952+K03948+K03968+K03968+K03958+K02128+K08844+K00418+K03963+K02273+K02267+K03964+K03957+K05687+K03967+K02271+K03955+K03942+K02264+K11352+K03940+K03965+K03962+K03936+K03941+K03946+K03950+K00419+K02271+K00413+K03938+K04554+K00416+K00416+K11353+K03951+K04552+K11351+K00420+K00411+K02138+K03959+K02135+K03939+K04551+K03948+K03947+K02128+K03956+…
Human Diseases	Neurodegenerative diseases	Huntington's disease	71	224	1.46393e-18	8.11016e-17	ko05016	ENSG00000164919;ENSG00000105258;ENSG00000125356;ENSG00000127184;ENSG00000164258;ENSG00000099624;ENSG00000135940;ENSG00000131143;ENSG00000119421;ENSG00000189043;ENSG00000151366;ENSG00000151366;ENSG00000090266;ENSG00000159199;ENSG00000164405;ENSG00000042753;ENSG00000099795;ENSG00000176340;ENSG00000126267;ENSG00000166136;ENSG00000183648;ENSG00000142168;ENSG00000109390;ENSG00000170516;ENSG00000004779…	K02268+K03017+K03945+K02272+K03937+K02134+K02265+K02263+K03952+K03948+K03968+K03968+K03958+K02128+K00418+K11827+K03963+K02273+K02267+K03964+K03957+K04565+K03967+K02271+K03955+K03942+K02264+K11352+K03013+K00432+K03940+K03965+K03962+K03936+K03014+K03941+K03946+K03950+K03008+K00419+K02271+K00413+K03938+K10408+K00416+K00416+K11353+K03951+K02159+K11351+K00420+K04644+K00411+K02138+K03959+K02135+K03939+…
Human Diseases	Neurodegenerative diseases	Alzheimer's disease	67	211	1.28969e-17	5.41005e-16	ko05010	ENSG00000164919;ENSG00000125356;ENSG00000127184;ENSG00000164258;ENSG00000002330;ENSG00000161509;ENSG00000099624;ENSG00000135940;ENSG00000131143;ENSG00000119421;ENSG00000189043;ENSG00000072506;ENSG00000151366;ENSG00000151366;ENSG00000090266;ENSG00000159199;ENSG00000164405;ENSG00000099795;ENSG00000176340;ENSG00000126267;ENSG00000166136;ENSG00000183648;ENSG00000109390;ENSG00000170516;ENSG00000004779…	K02268+K03945+K02272+K03937+K02158+K05211+K02134+K02265+K02263+K03952+K03948+K08683+K03968+K03968+K03958+K02128+K00418+K03963+K02273+K02267+K03964+K03957+K03967+K02271+K03955+K03942+K02264+K11352+K03940+K03965+K02090+K03962+K03936+K03941+K03946+K03950+K00419+K02271+K00413+K03938+K00416+K00416+K11353+K03951+K01389+K04524+K11351+K00420+K00411+K02138+K03959+K04550+K02135+K03939+K03948+K03947+K03156+…
Human Diseases	Immune diseases	Systemic lupus erythematosus	137	636	1.36716e-17	5.41005e-16	ko05322	ENSG00000184825;ENSG00000125835;ENSG00000203812;ENSG00000203812;ENSG00000197061;ENSG00000197061;ENSG00000197061;ENSG00000197061;ENSG00000197061;ENSG00000197061;ENSG00000197061;ENSG00000197061;ENSG00000197061;ENSG00000197061;ENSG00000197061;ENSG00000197061;ENSG00000197061;ENSG00000197061;ENSG00000203811;ENSG00000203811;ENSG00000203811;ENSG00000124529;ENSG00000124529;ENSG00000124529;ENSG00000124529…	K11251+K11086+K11251+K11251+K11254+K11254+K11254+K11254+K11254+K11254+K11254+K11254+K11254+K11254+K11254+K11254+K11254+K11254+K11253+K11253+K11253+K11254+K11254+K11254+K11254+K11254+K11254+K11254+K11254+K11254+K11254+K11254+K11254+K11254+K11254+K11251+K11251+K11252+K11252+K11252+K11252+K11252+K11253+K11253+K11253+K11253+K11253+K11253+K11253+K11253+K11253+K11253+K11251+K11251+K11252+K11251+K11251+…
Human Diseases	Endocrine and metabolic diseases	Non-alcoholic fatty liver disease (NAFLD)	60	191	1.21498e-15	4.20687e-14	ko04932	ENSG00000164919;ENSG00000125356;ENSG00000127184;ENSG00000164258;ENSG00000135940;ENSG00000131143;ENSG00000119421;ENSG00000189043;ENSG00000175197;ENSG00000151366;ENSG00000151366;ENSG00000090266;ENSG00000117461;ENSG00000164405;ENSG00000099795;ENSG00000176340;ENSG00000126267;ENSG00000166136;ENSG00000183648;ENSG00000078747;ENSG00000109390;ENSG00000170516;ENSG00000004779;ENSG00000167792;ENSG00000178741…	K02268+K03945+K02272+K03937+K02265+K02263+K03952+K03948+K04452+K03968+K03968+K03958+K02649+K00418+K03963+K02273+K02267+K03964+K03957+K05632+K03967+K02271+K03955+K03942+K02264+K11352+K03940+K03965+K03962+K03936+K03941+K04374+K03946+K03950+K00419+K02271+K00413+K03938+K00416+K00416+K11353+K03951+K02159+K04456+K11351+K00420+K00411+K03959+K03939+K03948+K03947+K03156+K07198+K03956+K00417+K05062+K00922+…
Human Diseases	Cancers	Transcriptional misregulation in cancers	71	321	5.07412e-10	1.5617e-08	ko05202	ENSG00000203811;ENSG00000203811;ENSG00000203811;ENSG00000175197;ENSG00000139318;ENSG00000256018;ENSG00000256018;ENSG00000256018;ENSG00000256018;ENSG00000256018;ENSG00000256018;ENSG00000256018;ENSG00000256018;ENSG00000256018;ENSG00000256018;ENSG00000184937;ENSG00000170458;ENSG00000197409;ENSG00000197409;ENSG00000197409;ENSG00000197409;ENSG00000197409;ENSG00000197409;ENSG00000197409;ENSG00000197409…	K11253+K11253+K11253+K04452+K04459+K11253+K11253+K11253+K11253+K11253+K11253+K11253+K11253+K11253+K11253+K09234+K04391+K11253+K11253+K11253+K11253+K11253+K11253+K11253+K11253+K11253+K11253+K11253+K11253+K11253+K11253+K10048+K09438+K15627+K06625+K17693+K11253+K11253+K11253+K11253+K11253+K11253+K11253+K11253+K11253+K11253+K11253+K11253+K11253+K11253+K11253+K11253+K11253+K11253+K11253+K11253+K16060+…
Organismal Systems	Circulatory system	Cardiac muscle contraction	26	92	1.62412e-06	4.49882e-05	ko04260	ENSG00000164919;ENSG00000127184;ENSG00000135940;ENSG00000131143;ENSG00000164405;ENSG00000176340;ENSG00000126267;ENSG00000170516;ENSG00000178741;ENSG00000198336;ENSG00000198467;ENSG00000114854;ENSG00000184076;ENSG00000131174;ENSG00000179091;ENSG00000173660;ENSG00000173660;ENSG00000127540;ENSG00000118194;ENSG00000169021;ENSG00000137731;ENSG00000018625;ENSG00000159251;ENSG00000156467;ENSG00000112695…	K02268+K02272+K02265+K02263+K00418+K02273+K02267+K02271+K02264+K12750+K10374+K05865+K00419+K02271+K00413+K00416+K00416+K00420+K12045+K00411+K01538+K01539+K12314+K00417+K02270+K02266
Genetic Information Processing	Folding, sorting and degradation	Proteasome	19	61	8.73856e-06	0.000220053	ko03050	ENSG00000142507;ENSG00000101182;ENSG00000159377;ENSG00000108294;ENSG00000092010;ENSG00000240065;ENSG00000106588;ENSG00000100911;ENSG00000143106;ENSG00000136930;ENSG00000165916;ENSG00000013275;ENSG00000087191;ENSG00000205220;ENSG00000127922;ENSG00000159352;ENSG00000100804;ENSG00000132963;ENSG00000008018	K02738+K02731+K02736+K02735+K06696+K02741+K02726+K06697+K02729+K02739+K03065+K03063+K03066+K02733+K10881+K03029+K02737+K11599+K02732
Metabolism	Nucleotide metabolism	Pyrimidine metabolism	26	125	0.000480796	0.0110984	ko00240	ENSG00000105258;ENSG00000125877;ENSG00000167900;ENSG00000106628;ENSG00000184470;ENSG00000171453;ENSG00000179958;ENSG00000115350;ENSG00000025708;ENSG00000099817;ENSG00000239672;ENSG00000198805;ENSG00000161980;ENSG00000103024;ENSG00000100142;ENSG00000100413;ENSG00000011052;ENSG00000011052;ENSG00000175482;ENSG00000005075;ENSG00000125458;ENSG00000243678;ENSG00000243678;ENSG00000066379;ENSG00000168393…	K03017+K01519+K00857+K02328+K00384+K03027+K16904+K03506+K00758+K03013+K00940+K03783+K03019+K00940+K03014+K03022+K00940+K00940+K03505+K03008+K01081+K00940+K00940+K03000+K00943+K03007
Environmental Information Processing	Signal transduction	HIF-1 signaling pathway	23	116	0.00195433	0.0416422	ko04066	ENSG00000135766;ENSG00000112715;ENSG00000117394;ENSG00000103363;ENSG00000170525;ENSG00000117461;ENSG00000175634;ENSG00000129521;ENSG00000100387;ENSG00000187840;ENSG00000100292;ENSG00000137154;ENSG00000102265;ENSG00000269858;ENSG00000124762;ENSG00000078401;ENSG00000117020;ENSG00000159399;ENSG00000146648;ENSG00000126934;ENSG00000152256;ENSG00000111674;ENSG00000121879	K09592+K05448+K07299+K03873+K01103+K02649+K04688+K09592+K03868+K07205+K00510+K02991+K16451+K09592+K06625+K16366+K04456+K00844+K04361+K04369+K12077+K01689+K00922
Genetic Information Processing	Transcription	Spliceosome	33	193	0.00324688	0.0642418	ko03040	ENSG00000143977;ENSG00000125835;ENSG00000105618;ENSG00000162385;ENSG00000162385;ENSG00000204392;ENSG00000169976;ENSG00000160799;ENSG00000204388;ENSG00000204388;ENSG00000125743;ENSG00000124562;ENSG00000179950;ENSG00000164167;ENSG00000100410;ENSG00000100138;ENSG00000171960;ENSG00000141759;ENSG00000183684;ENSG00000167088;ENSG00000106245;ENSG00000130520;ENSG00000104852;ENSG00000170860;ENSG00000100028…	K11099+K11086+K12844+K12877+K12877+K12621+K12832+K12871+K03283+K03283+K11096+K11095+K12838+K12625+K12834+K12845+K09567+K12859+K12881+K11087+K12873+K12623+K11093+K12622+K11088+K12865+K11097+K12626+K11098+K03283+K03283+K12876+K12836
Metabolism	Nucleotide metabolism	Purine metabolism	33	207	0.00958802	0.177059	ko00230	XLOC_007068;XLOC_021017;ENSG00000105258;ENSG00000125877;ENSG00000133805;ENSG00000106628;ENSG00000171453;ENSG00000138735;ENSG00000115350;ENSG00000143774;ENSG00000099817;ENSG00000239672;ENSG00000198805;ENSG00000161980;ENSG00000103024;ENSG00000100142;ENSG00000198931;ENSG00000100413;ENSG00000011052;ENSG00000011052;ENSG00000175482;ENSG00000114956;ENSG00000005075;ENSG00000162433;ENSG00000125458;ENSG000…	K12319+K11265+K03017+K01519+K01490+K02328+K03027+K13762+K03506+K00942+K03013+K00940+K03783+K03019+K00940+K03014+K00759+K03022+K00940+K00940+K03505+K00904+K03008+K00939+K01081+K00940+K00940+K03000+K03007+K13293+K00939+K01490+K00364
Human Diseases	Cancers	Renal cell carcinoma	14	74	0.0207158	0.358641	ko05211	ENSG00000135766;ENSG00000112715;ENSG00000174775;ENSG00000117394;ENSG00000103363;ENSG00000117461;ENSG00000116016;ENSG00000129521;ENSG00000100387;ENSG00000269858;ENSG00000117020;ENSG00000126934;ENSG00000100311;ENSG00000121879	K09592+K05448+K02833+K07299+K03873+K02649+K09095+K09592+K03868+K09592+K04456+K04369+K17386+K00922
Metabolism	Metabolism of cofactors and vitamins	One carbon pool by folate	6	22	0.0227465	0.370634	ko00670	ENSG00000145020;ENSG00000259332;ENSG00000259332;ENSG00000136010;ENSG00000116984;ENSG00000177000	K00605+K01934+K01934+K00289+K00548+K00297
Metabolism	Carbohydrate metabolism	Fructose and mannose metabolism	8	35	0.0260343	0.400639	ko00051	XLOC_003388;ENSG00000170525;ENSG00000085662;ENSG00000114268;ENSG00000138030;ENSG00000159399;ENSG00000144591;ENSG00000123836	K00011+K01103+K00011+K19030+K00846+K00844+K00966+K19029
Genetic Information Processing	Replication and repair	DNA replication	9	43	0.032188	0.446907	ko03030	ENSG00000106628;ENSG00000166508;ENSG00000106399;ENSG00000115350;ENSG00000168496;ENSG00000175482;ENSG00000172922;ENSG00000106028;ENSG00000104889	K02328+K02210+K10740+K03506+K04799+K03505+K10745+K03111+K10743
Environmental Information Processing	Signal transduction	mTOR signaling pathway	13	71	0.0322677	0.446907	ko04150	ENSG00000112715;ENSG00000118046;ENSG00000167965;ENSG00000117461;ENSG00000204673;ENSG00000175634;ENSG00000187840;ENSG00000168209;ENSG00000137154;ENSG00000117020;ENSG00000232810;ENSG00000162409;ENSG00000121879	K05448+K07298+K08266+K02649+K16184+K04688+K07205+K08270+K02991+K04456+K03156+K07198+K00922
Genetic Information Processing	Translation	Ribosome biogenesis in eukaryotes	17	104	0.0430388	0.567702	ko03008	ENSG00000204435;ENSG00000145912;ENSG00000172336;ENSG00000162231;ENSG00000136718;ENSG00000109534;ENSG00000100138;ENSG00000114127;ENSG00000101361;ENSG00000189306;ENSG00000178718;ENSG00000182117;ENSG00000242372;ENSG00000167272;ENSG00000183751;ENSG00000132661;ENSG00000105202	K03115+K11129+K14527+K14284+K14561+K11128+K12845+K12618+K14564+K14545+K14525+K11130+K03264+K03537+K14555+K14285+K14563
Human Diseases	Cancers	Viral carcinogenesis	67	522	0.0466675	0.571442	ko05203	ENSG00000179388;ENSG00000002330;ENSG00000174775;ENSG00000197061;ENSG00000197061;ENSG00000197061;ENSG00000197061;ENSG00000197061;ENSG00000197061;ENSG00000197061;ENSG00000197061;ENSG00000197061;ENSG00000197061;ENSG00000197061;ENSG00000197061;ENSG00000197061;ENSG00000197061;ENSG00000124529;ENSG00000124529;ENSG00000124529;ENSG00000124529;ENSG00000124529;ENSG00000124529;ENSG00000124529;ENSG00000124529…	K12497+K02158+K02833+K11254+K11254+K11254+K11254+K11254+K11254+K11254+K11254+K11254+K11254+K11254+K11254+K11254+K11254+K11254+K11254+K11254+K11254+K11254+K11254+K11254+K11254+K11254+K11254+K11254+K11254+K11254+K11254+K03363+K15306+K05411+K02649+K10152+K11252+K11252+K11252+K11252+K11252+K11252+K04374+K04734+K06625+K02159+K02146+K11252+K11254+K11254+K11254+K11254+K11254+K11254+K11254+K11254+K11254+…
Genetic Information Processing	Transcription	RNA polymerase	9	46	0.0474483	0.571442	ko03020	ENSG00000105258;ENSG00000171453;ENSG00000099817;ENSG00000161980;ENSG00000100142;ENSG00000100413;ENSG00000005075;ENSG00000066379;ENSG00000177700	K03017+K03027+K03013+K03019+K03014+K03022+K03008+K03000+K03007
Metabolism	Amino acid metabolism	Cysteine and methionine metabolism	8	40	0.0534778	0.617223	ko00270	ENSG00000128311;ENSG00000166796;ENSG00000146701;ENSG00000116649;ENSG00000116984;ENSG00000139410;ENSG00000198650;ENSG00000104951	K01011+K00016+K00026+K00797+K00548+K17989+K00815+K03334
Cellular Processes	Transport and catabolism	Peroxisome	14	86	0.0641137	0.703559	ko04146	ENSG00000242612;ENSG00000112874;ENSG00000126432;ENSG00000136881;ENSG00000104823;ENSG00000142168;ENSG00000176894;ENSG00000254858;ENSG00000117450;ENSG00000163344;ENSG00000187630;ENSG00000157326;ENSG00000104883;ENSG00000121680	K13237+K03426+K11187+K00659+K12663+K04565+K13347+K13348+K13279+K13273+K11147+K11147+K13353+K13335
Human Diseases	Cancers	Bladder cancer	9	49	0.0668687	0.703559	ko05219	ENSG00000112715;ENSG00000174775;ENSG00000025708;ENSG00000113070;ENSG00000124762;ENSG00000146648;ENSG00000126934;ENSG00000101412;ENSG00000167657	K05448+K02833+K00758+K08523+K06625+K04361+K04369+K17454+K08803
Genetic Information Processing	Replication and repair	Homologous recombination	7	35	0.068578	0.703559	ko03440	ENSG00000106628;ENSG00000106399;ENSG00000002016;ENSG00000175482;ENSG00000127922;ENSG00000106028;ENSG00000113522	K02328+K10740+K10873+K03505+K10881+K03111+K10866
Genetic Information Processing	Folding, sorting and degradation	Sulfur relay system	3	10	0.0793304	0.784804	ko04122	ENSG00000128311;ENSG00000142544;ENSG00000174177	K01011+K14168+K14169
Organismal Systems	Digestive system	Mineral absorption	10	59	0.0863404	0.823017	ko04978	ENSG00000087086;ENSG00000157765;ENSG00000103415;ENSG00000187193;ENSG00000147804;ENSG00000100292;ENSG00000125148;ENSG00000177556;ENSG00000137731;ENSG00000018625	K13625+K14683+K00510+K14739+K14710+K00510+K14739+K07213+K01538+K01539
Metabolism	Amino acid metabolism	Phenylalanine, tyrosine and tryptophan biosynthesis	2	5	0.0891354	0.823017	ko00400	ENSG00000198650;ENSG00000104951	K00815+K03334
Human Diseases	Cancers	Prostate cancer	15	99	0.0934866	0.827093	ko05215	ENSG00000002330;ENSG00000174775;ENSG00000117461;ENSG00000084207;ENSG00000128272;ENSG00000100906;ENSG00000124762;ENSG00000117020;ENSG00000146648;ENSG00000126934;ENSG00000105173;ENSG00000182158;ENSG00000100311;ENSG00000121879;ENSG00000101412	K02158+K02833+K02649+K00799+K04374+K04734+K06625+K04456+K04361+K04369+K06626+K09048+K17386+K00922+K17454
Metabolism	Amino acid metabolism	Phenylalanine metabolism	4	17	0.0955487	0.827093	ko00360	ENSG00000131471;ENSG00000198650;ENSG00000104951;ENSG00000240972	K00276+K00815+K03334+K07253
Environmental Information Processing	Signal transduction	VEGF signaling pathway	11	70	0.113325	0.95124	ko04370	ENSG00000112715;ENSG00000168970;ENSG00000002330;ENSG00000174775;ENSG00000169750;ENSG00000176170;ENSG00000117461;ENSG00000106211;ENSG00000117020;ENSG00000126934;ENSG00000121879	K05448+K16342+K02158+K02833+K07861+K04718+K02649+K04455+K04456+K04369+K00922
Metabolism	Biosynthesis of other secondary metabolites	Butirosin and neomycin biosynthesis	2	6	0.12461	1	ko00524	ENSG00000106633;ENSG00000159399	K12407+K00844
Genetic Information Processing	Replication and repair	Mismatch repair	6	33	0.126859	1	ko03430	XLOC_007436;ENSG00000119684;ENSG00000106628;ENSG00000106399;ENSG00000175482;ENSG00000106028	K10858+K08739+K02328+K10740+K03505+K03111
Metabolism	Amino acid metabolism	Glycine, serine and threonine metabolism	7	41	0.133772	1	ko00260	ENSG00000130005;ENSG00000145020;ENSG00000131471;ENSG00000092621;ENSG00000139410;ENSG00000100116;ENSG00000124713	K00542+K00605+K00276+K00058+K17989+K00639+K00552
Human Diseases	Infectious diseases	African trypanosomiasis	8	50	0.149895	1	ko05143	ENSG00000100342;ENSG00000188536;ENSG00000188536;ENSG00000118137;ENSG00000232810;ENSG00000172009;ENSG00000206172;ENSG00000206172	K14480+K13822+K13822+K08757+K03156+K01392+K13822+K13822
Organismal Systems	Excretory system	Aldosterone-regulated sodium reabsorption	7	43	0.160556	1	ko04960	ENSG00000117461;ENSG00000175793;ENSG00000065054;ENSG00000137731;ENSG00000018625;ENSG00000118515;ENSG00000121879	K02649+K06644+K13358+K01538+K01539+K13302+K00922
Genetic Information Processing	Replication and repair	Base excision repair	6	36	0.171874	1	ko03410	ENSG00000106628;ENSG00000103152;ENSG00000115350;ENSG00000168496;ENSG00000175482;ENSG00000065057	K02328+K03652+K03506+K04799+K03505+K10773
Human Diseases	Cancers	Small cell lung cancer	15	110	0.177823	1	ko05222	ENSG00000164171;ENSG00000076604;ENSG00000169031;ENSG00000117461;ENSG00000123975;ENSG00000100906;ENSG00000101197;ENSG00000117020;ENSG00000105173;ENSG00000023445;ENSG00000081052;ENSG00000173207;ENSG00000121879;ENSG00000101412;ENSG00000082512	K06481+K09848+K06237+K02649+K02219+K04734+K16061+K04456+K06626+K16060+K06237+K02219+K00922+K17454+K09849
Genetic Information Processing	Replication and repair	Fanconi anemia pathway	11	77	0.182266	1	ko03460	XLOC_007436;ENSG00000132207;ENSG00000132207;ENSG00000100726;ENSG00000106399;ENSG00000101751;ENSG00000122008;ENSG00000114315;ENSG00000181625;ENSG00000181625;ENSG00000169689	K10858+K15078+K15078+K11137+K10740+K03510+K03511+K06054+K15078+K15078+K15360
Genetic Information Processing	Folding, sorting and degradation	RNA degradation	15	111	0.18696	1	ko03018	ENSG00000204392;ENSG00000077348;ENSG00000135473;ENSG00000164167;ENSG00000114127;ENSG00000175324;ENSG00000110063;ENSG00000130520;ENSG00000075914;ENSG00000170860;ENSG00000254535;ENSG00000223496;ENSG00000178896;ENSG00000130332;ENSG00000111674	K12621+K12590+K12571+K12625+K12618+K12620+K12584+K12623+K12589+K12622+K13126+K12587+K11600+K12626+K01689
Metabolism	Glycan biosynthesis and metabolism	N-Glycan biosynthesis	8	53	0.189053	1	ko00510	ENSG00000129562;ENSG00000033011;ENSG00000136908;ENSG00000172339;ENSG00000258529;ENSG00000175548;ENSG00000175548;ENSG00000179085	K12668+K03842+K09658+K07441+K03846+K03850+K03850+K09659
Cellular Processes	Cell growth and death	p53 signaling pathway	11	78	0.193451	1	ko04115	ENSG00000130222;ENSG00000112576;ENSG00000099860;ENSG00000175793;ENSG00000120471;ENSG00000138764;ENSG00000124762;ENSG00000087088;ENSG00000105173;ENSG00000198625;ENSG00000116717	K04402+K10152+K04402+K06644+K13773+K10146+K06625+K02159+K06626+K10127+K04402
Cellular Processes	Cell growth and death	Cell cycle	18	138	0.19888	1	ko04110	ENSG00000176386;ENSG00000130222;ENSG00000117399;ENSG00000166508;ENSG00000112576;ENSG00000099860;ENSG00000077935;ENSG00000175793;ENSG00000100387;ENSG00000164611;ENSG00000164045;ENSG00000124762;ENSG00000141552;ENSG00000105173;ENSG00000116670;ENSG00000101412;ENSG00000129757;ENSG00000116717	K03359+K04402+K03363+K02210+K10152+K04402+K06636+K06644+K03868+K06635+K06645+K06625+K03358+K06626+K13728+K17454+K09993+K04402
Genetic Information Processing	Folding, sorting and degradation	Ubiquitin mediated proteolysis	21	165	0.207032	1	ko04120	XLOC_008230;XLOC_008522;XLOC_008523;ENSG00000176386;ENSG00000114125;ENSG00000185338;ENSG00000103363;ENSG00000117399;ENSG00000108106;ENSG00000078747;ENSG00000100387;ENSG00000099804;ENSG00000198642;ENSG00000130725;ENSG00000101197;ENSG00000160087;ENSG00000103266;ENSG00000185651;ENSG00000141552;ENSG00000023445;ENSG00000078967	K10595+K10595+K10595+K03359+K10611+K04694+K03873+K03363+K10583+K05632+K03868+K02207+K10447+K10579+K16061+K04554+K09561+K04552+K03358+K16060+K06689
Human Diseases	Neurodegenerative diseases	Amyotrophic lateral sclerosis (ALS)	9	63	0.213507	1	ko05014	ENSG00000002330;ENSG00000161509;ENSG00000142168;ENSG00000034152;ENSG00000233276;ENSG00000087088;ENSG00000135406;ENSG00000173992;ENSG00000232810	K02158+K05211+K04565+K04432+K00432+K02159+K07607+K04569+K03156
Human Diseases	Cancers	Central carbon metabolism in cancer	11	80	0.216706	1	ko05230	ENSG00000174775;ENSG00000106633;ENSG00000117394;ENSG00000117461;ENSG00000117020;ENSG00000159399;ENSG00000146648;ENSG00000126934;ENSG00000152256;ENSG00000130489;ENSG00000121879	K02833+K12407+K07299+K02649+K04456+K00844+K04361+K04369+K12077+K07152+K00922
Organismal Systems	Environmental adaptation	Circadian rhythm	5	31	0.222298	1	ko04710	ENSG00000049246;ENSG00000100387;ENSG00000134107;ENSG00000069667;ENSG00000162409	K02633+K03868+K03729+K08532+K07198
Human Diseases	Cancers	Colorectal cancer	10	73	0.234798	1	ko05210	ENSG00000002330;ENSG00000169750;ENSG00000117461;ENSG00000089685;ENSG00000115266;ENSG00000170345;ENSG00000087088;ENSG00000117020;ENSG00000121879;ENSG00000106799	K02158+K07861+K02649+K08731+K02085+K04379+K02159+K04456+K00922+K04674
Metabolism	Metabolism of cofactors and vitamins	Nicotinate and nicotinamide metabolism	5	32	0.242484	1	ko00760	ENSG00000112874;ENSG00000166741;ENSG00000198805;ENSG00000125458;ENSG00000147813	K03426+K00541+K03783+K01081+K00763
Genetic Information Processing	Folding, sorting and degradation	Protein processing in endoplasmic reticulum	25	205	0.244615	1	ko04141	ENSG00000089248;ENSG00000075826;ENSG00000129562;ENSG00000180879;ENSG00000204388;ENSG00000204388;ENSG00000175197;ENSG00000106803;ENSG00000100387;ENSG00000087074;ENSG00000120725;ENSG00000133265;ENSG00000086061;ENSG00000128272;ENSG00000107262;ENSG00000160087;ENSG00000103266;ENSG00000087088;ENSG00000163479;ENSG00000169223;ENSG00000180667;ENSG00000109846;ENSG00000078967;ENSG00000204389;ENSG00000204389	K09586+K14005+K12668+K04571+K03283+K03283+K04452+K09481+K03868+K14019+K14001+K09562+K09502+K04374+K09555+K04554+K09561+K02159+K13250+K10082+K13719+K09542+K06689+K03283+K03283
Organismal Systems	Immune system	Cytosolic DNA-sensing pathway	10	76	0.274979	1	ko04623	ENSG00000126456;ENSG00000171453;ENSG00000099817;ENSG00000104825;ENSG00000161980;ENSG00000100142;ENSG00000100413;ENSG00000100906;ENSG00000177700;ENSG00000164430	K05411+K03027+K03013+K02581+K03019+K03014+K03022+K04734+K03007+K17834
Environmental Information Processing	Signal transduction	FoxO signaling pathway	19	156	0.283333	1	ko04068	ENSG00000118046;ENSG00000174775;ENSG00000170296;ENSG00000176171;ENSG00000130222;ENSG00000117461;ENSG00000099860;ENSG00000126457;ENSG00000138764;ENSG00000124762;ENSG00000117020;ENSG00000146648;ENSG00000126934;ENSG00000051128;ENSG00000162409;ENSG00000118515;ENSG00000121879;ENSG00000106799;ENSG00000116717	K07298+K02833+K08341+K15464+K04402+K02649+K04402+K11434+K10146+K06625+K04456+K04361+K04369+K15010+K07198+K13302+K00922+K04674+K04402
Metabolism	Energy metabolism	Sulfur metabolism	2	10	0.284129	1	ko00920	ENSG00000128311;ENSG00000105755	K01011+K17725
Metabolism	Metabolism of terpenoids and polyketides	Terpenoid backbone biosynthesis	4	26	0.290017	1	ko00900	ENSG00000148377;ENSG00000173653;ENSG00000167508;ENSG00000163344	K01823+K08658+K01597+K13273
Organismal Systems	Endocrine system	Insulin signaling pathway	20	166	0.293424	1	ko04910	ENSG00000002330;ENSG00000174775;ENSG00000106633;ENSG00000185338;ENSG00000117461;ENSG00000068976;ENSG00000172531;ENSG00000175634;ENSG00000104812;ENSG00000187840;ENSG00000049769;ENSG00000137154;ENSG00000117020;ENSG00000159399;ENSG00000126934;ENSG00000173281;ENSG00000119938;ENSG00000162409;ENSG00000121879;ENSG00000156873	K02158+K02833+K12407+K04694+K02649+K00688+K06269+K04688+K00693+K07205+K17453+K02991+K04456+K00844+K04369+K07189+K07189+K07198+K00922+K00871
Human Diseases	Cancers	Chronic myeloid leukemia	11	87	0.305753	1	ko05220	ENSG00000002330;ENSG00000174775;ENSG00000117461;ENSG00000033327;ENSG00000100906;ENSG00000124762;ENSG00000117020;ENSG00000126934;ENSG00000121879;ENSG00000101412;ENSG00000106799	K02158+K02833+K02649+K08091+K04734+K06625+K04456+K04369+K00922+K17454+K04674
Environmental Information Processing	Signal transduction	ErbB signaling pathway	12	96	0.307951	1	ko04012	ENSG00000002330;ENSG00000174775;ENSG00000117461;ENSG00000175634;ENSG00000187840;ENSG00000113070;ENSG00000124762;ENSG00000117020;ENSG00000146648;ENSG00000109321;ENSG00000126934;ENSG00000121879	K02158+K02833+K02649+K04688+K07205+K08523+K06625+K04456+K04361+K09782+K04369+K00922
Organismal Systems	Endocrine system	Glucagon signaling pathway	14	114	0.310808	1	ko04922	ENSG00000106633;ENSG00000117394;ENSG00000068976;ENSG00000166796;ENSG00000104812;ENSG00000126457;ENSG00000128272;ENSG00000117020;ENSG00000182158;ENSG00000142178;ENSG00000149923;ENSG00000162409;ENSG00000169169;ENSG00000156873	K12407+K07299+K00688+K00016+K00693+K11434+K04374+K04456+K09048+K19008+K15423+K07198+K19524+K00871
Human Diseases	Cancers	Choline metabolism in cancer	14	115	0.322609	1	ko05231	ENSG00000168970;ENSG00000174775;ENSG00000169750;ENSG00000102780;ENSG00000117461;ENSG00000175634;ENSG00000187840;ENSG00000141934;ENSG00000170345;ENSG00000117020;ENSG00000146648;ENSG00000126934;ENSG00000100311;ENSG00000121879	K16342+K02833+K07861+K00901+K02649+K04688+K07205+K01080+K04379+K04456+K04361+K04369+K17386+K00922
Metabolism	Metabolism of other amino acids	Selenocompound metabolism	3	19	0.32273	1	ko00450	ENSG00000184470;ENSG00000116984;ENSG00000109618	K00384+K00548+K03341
Organismal Systems	Excretory system	Collecting duct acid secretion	5	36	0.327038	1	ko04966	ENSG00000171130;ENSG00000159720;ENSG00000128524;ENSG00000113732;ENSG00000185883	K02153+K02146+K02151+K02153+K02155
Human Diseases	Cancers	Acute myeloid leukemia	9	71	0.329221	1	ko05221	ENSG00000002330;ENSG00000174775;ENSG00000117461;ENSG00000175634;ENSG00000187840;ENSG00000066336;ENSG00000117020;ENSG00000126934;ENSG00000121879	K02158+K02833+K02649+K04688+K07205+K09438+K04456+K04369+K00922
Human Diseases	Cancers	Endometrial cancer	8	63	0.342514	1	ko05213	ENSG00000002330;ENSG00000174775;ENSG00000117461;ENSG00000115266;ENSG00000117020;ENSG00000146648;ENSG00000126934;ENSG00000121879	K02158+K02833+K02649+K02085+K04456+K04361+K04369+K00922
Human Diseases	Cancers	Melanoma	10	81	0.345815	1	ko05218	ENSG00000002330;ENSG00000174775;ENSG00000117461;ENSG00000124762;ENSG00000117020;ENSG00000146648;ENSG00000126934;ENSG00000100311;ENSG00000121879;ENSG00000101412	K02158+K02833+K02649+K06625+K04456+K04361+K04369+K17386+K00922+K17454
Environmental Information Processing	Signal transduction	TGF-beta signaling pathway	12	99	0.346812	1	ko04350	ENSG00000175634;ENSG00000100387;ENSG00000172201;ENSG00000158747;ENSG00000158747;ENSG00000114739;ENSG00000115738;ENSG00000104899;ENSG00000095739;ENSG00000232810;ENSG00000117318;ENSG00000106799	K04688+K03868+K17695+K19558+K19558+K13596+K17693+K04665+K10162+K03156+K17694+K04674
Metabolism	Carbohydrate metabolism	Galactose metabolism	5	37	0.348735	1	ko00052	XLOC_003388;ENSG00000106633;ENSG00000085662;ENSG00000159399;ENSG00000108479	K00011+K12407+K00011+K00844+K00849
Metabolism	Glycan biosynthesis and metabolism	Glycosaminoglycan biosynthesis - chondroitin sulfate / dermatan sulfate	3	20	0.352856	1	ko00532	ENSG00000149541;ENSG00000136213;ENSG00000176022	K10158+K04742+K00734
Human Diseases	Neurodegenerative diseases	Prion diseases	7	55	0.357168	1	ko05020	ENSG00000204388;ENSG00000120738;ENSG00000142168;ENSG00000106804;ENSG00000087088;ENSG00000126934;ENSG00000204389	K03283+K09203+K04565+K03994+K02159+K04369+K03283
Human Diseases	Infectious diseases	Malaria	8	64	0.359008	1	ko05144	ENSG00000188536;ENSG00000188536;ENSG00000123384;ENSG00000232810;ENSG00000108342;ENSG00000110651;ENSG00000206172;ENSG00000206172	K13822+K13822+K04550+K03156+K05423+K06508+K13822+K13822
Metabolism	Amino acid metabolism	Valine, leucine and isoleucine biosynthesis	1	4	0.359021	1	ko00290	ENSG00000139410	K17989
Metabolism	Metabolism of cofactors and vitamins	Riboflavin metabolism	1	4	0.359021	1	ko00740	ENSG00000160688	K00953
Human Diseases	Infectious diseases	Epithelial cell signaling in Helicobacter pylori infection	10	82	0.360366	1	ko05120	ENSG00000113070;ENSG00000100906;ENSG00000171130;ENSG00000117410;ENSG00000159720;ENSG00000146648;ENSG00000128524;ENSG00000137845;ENSG00000113732;ENSG00000185883	K08523+K04734+K02153+K03661+K02146+K04361+K02151+K06704+K02153+K02155
Genetic Information Processing	Folding, sorting and degradation	SNARE interactions in vesicular transport	5	38	0.370507	1	ko04130	ENSG00000170310;ENSG00000118640;ENSG00000104915;ENSG00000113734;ENSG00000053501	K08501+K08512+K08498+K08497+K08507
Organismal Systems	Immune system	Fc gamma R-mediated phagocytosis	13	110	0.372037	1	ko04666	ENSG00000172757;ENSG00000176170;ENSG00000117461;ENSG00000155130;ENSG00000033327;ENSG00000175634;ENSG00000175130;ENSG00000141934;ENSG00000130429;ENSG00000241553;ENSG00000117020;ENSG00000136950;ENSG00000121879	K05765+K04718+K02649+K12561+K08091+K04688+K13536+K01080+K05757+K05755+K04456+K05754+K00922
Metabolism	Metabolism of other amino acids	Glutathione metabolism	7	56	0.375048	1	ko00480	ENSG00000184674;ENSG00000084207;ENSG00000233276;ENSG00000148834;ENSG00000116649;ENSG00000065621;ENSG00000167468	K00799+K00799+K00432+K00799+K00797+K00799+K05361
Human Diseases	Infectious diseases	Hepatitis B	21	185	0.389941	1	ko05161	ENSG00000179388;ENSG00000002330;ENSG00000174775;ENSG00000126456;ENSG00000117461;ENSG00000089685;ENSG00000128272;ENSG00000243414;ENSG00000134248;ENSG00000100906;ENSG00000170345;ENSG00000124762;ENSG00000087088;ENSG00000117020;ENSG00000126934;ENSG00000105173;ENSG00000182158;ENSG00000232810;ENSG00000121879;ENSG00000101412;ENSG00000106799	K12497+K02158+K02833+K05411+K02649+K08731+K04374+K05409+K16344+K04734+K04379+K06625+K02159+K04456+K04369+K06626+K09048+K03156+K00922+K17454+K04674
Organismal Systems	Excretory system	Vasopressin-regulated water reabsorption	6	48	0.393135	1	ko04962	ENSG00000088986;ENSG00000242173;ENSG00000165272;ENSG00000141522;ENSG00000187240;ENSG00000182158	K10418+K12462+K09876+K12462+K10414+K09048
Human Diseases	Endocrine and metabolic diseases	Insulin resistance	15	131	0.404831	1	ko04931	ENSG00000117394;ENSG00000117461;ENSG00000068976;ENSG00000172531;ENSG00000175634;ENSG00000104812;ENSG00000083807;ENSG00000100906;ENSG00000117020;ENSG00000182158;ENSG00000173281;ENSG00000119938;ENSG00000232810;ENSG00000162409;ENSG00000121879	K07299+K02649+K00688+K06269+K04688+K00693+K08748+K04734+K04456+K09048+K07189+K07189+K03156+K07198+K00922
Human Diseases	Infectious diseases	Pathogenic Escherichia coli infection	9	76	0.406656	1	ko05130	ENSG00000183785;ENSG00000188229;ENSG00000111057;ENSG00000170458;ENSG00000137267;ENSG00000130429;ENSG00000241553;ENSG00000136950;ENSG00000167553	K07374+K07375+K07604+K04391+K07375+K05757+K05755+K05754+K07374
Organismal Systems	Nervous system	Synaptic vesicle cycle	9	76	0.406656	1	ko04721	ENSG00000042753;ENSG00000171130;ENSG00000117410;ENSG00000159720;ENSG00000122705;ENSG00000128524;ENSG00000175416;ENSG00000113732;ENSG00000185883	K11827+K02153+K03661+K02146+K04644+K02151+K04645+K02153+K02155
Human Diseases	Infectious diseases	Shigellosis	9	76	0.406656	1	ko05131	ENSG00000177105;ENSG00000104825;ENSG00000108518;ENSG00000100906;ENSG00000130429;ENSG00000241553;ENSG00000136950;ENSG00000116670;ENSG00000160201	K07863+K02581+K05759+K04734+K05757+K05755+K05754+K13728+K12836
Organismal Systems	Digestive system	Bile secretion	9	77	0.422253	1	ko04976	ENSG00000117394;ENSG00000012504;ENSG00000264324;ENSG00000136881;ENSG00000205754;ENSG00000083807;ENSG00000143819;ENSG00000137731;ENSG00000018625	K07299+K08537+K13857+K00659+K05043+K08748+K01253+K01538+K01539
Organismal Systems	Immune system	Fc epsilon RI signaling pathway	10	87	0.433853	1	ko04664	ENSG00000168970;ENSG00000174775;ENSG00000169750;ENSG00000117461;ENSG00000033327;ENSG00000034152;ENSG00000117020;ENSG00000126934;ENSG00000232810;ENSG00000121879	K16342+K02833+K07861+K02649+K08091+K04432+K04456+K04369+K03156+K00922
Environmental Information Processing	Signal transduction	AMPK signaling pathway	15	134	0.440468	1	ko04152	ENSG00000118046;ENSG00000170525;ENSG00000117461;ENSG00000204673;ENSG00000175634;ENSG00000104812;ENSG00000187840;ENSG00000114268;ENSG00000117020;ENSG00000182158;ENSG00000123836;ENSG00000162409;ENSG00000116678;ENSG00000121879;ENSG00000169169	K07298+K01103+K02649+K16184+K04688+K00693+K07205+K19030+K04456+K09048+K19029+K07198+K05062+K00922+K19524
Metabolism	Metabolism of cofactors and vitamins	Folate biosynthesis	2	14	0.442029	1	ko00790	ENSG00000163283;ENSG00000150787	K01077+K01737
Organismal Systems	Immune system	B cell receptor signaling pathway	11	97	0.444076	1	ko04662	ENSG00000174775;ENSG00000169750;ENSG00000105369;ENSG00000117461;ENSG00000104825;ENSG00000100906;ENSG00000170345;ENSG00000117020;ENSG00000126934;ENSG00000110651;ENSG00000121879	K02833+K07861+K06506+K02649+K02581+K04734+K04379+K04456+K04369+K06508+K00922
Metabolism	Amino acid metabolism	Arginine and proline metabolism	6	51	0.451551	1	ko00330	ENSG00000122884;ENSG00000130005;ENSG00000141504;ENSG00000116649;ENSG00000104524;ENSG00000166165	K00472+K00542+K00657+K00797+K00286+K00933
Genetic Information Processing	Folding, sorting and degradation	Protein export	3	24	0.470187	1	ko03060	ENSG00000153037;ENSG00000106803;ENSG00000144867	K03105+K09481+K12272
Metabolism	Lipid metabolism	Biosynthesis of unsaturated fatty acids	3	24	0.470187	1	ko01040	ENSG00000136881;ENSG00000097021;ENSG00000099797	K00659+K17360+K10258
Human Diseases	Endocrine and metabolic diseases	Type II diabetes mellitus	7	62	0.481923	1	ko04930	ENSG00000182759;ENSG00000106633;ENSG00000185338;ENSG00000117461;ENSG00000159399;ENSG00000232810;ENSG00000121879	K07595+K12407+K04694+K02649+K00844+K03156+K00922
Human Diseases	Cancers	Pancreatic cancer	9	81	0.4842	1	ko05212	ENSG00000112715;ENSG00000002330;ENSG00000169750;ENSG00000117461;ENSG00000117020;ENSG00000146648;ENSG00000121879;ENSG00000101412;ENSG00000106799	K05448+K02158+K07861+K02649+K04456+K04361+K00922+K17454+K04674
Organismal Systems	Endocrine system	Prolactin signaling pathway	9	81	0.4842	1	ko04917	ENSG00000174775;ENSG00000106633;ENSG00000185338;ENSG00000117461;ENSG00000170345;ENSG00000120659;ENSG00000117020;ENSG00000126934;ENSG00000121879	K02833+K12407+K04694+K02649+K04379+K05473+K04456+K04369+K00922
Organismal Systems	Endocrine system	Renin-angiotensin system	3	25	0.49809	1	ko04614	XLOC_001628;ENSG00000196549;ENSG00000172009	K01380+K01389+K01392
Organismal Systems	Excretory system	Proximal tubule bicarbonate reclamation	3	25	0.49809	1	ko04964	ENSG00000183048;ENSG00000137731;ENSG00000018625	K13577+K01538+K01539
Human Diseases	Cancers	Glioma	9	82	0.499468	1	ko05214	ENSG00000174775;ENSG00000117461;ENSG00000124762;ENSG00000117020;ENSG00000146648;ENSG00000126934;ENSG00000100311;ENSG00000121879;ENSG00000101412	K02833+K02649+K06625+K04456+K04361+K04369+K17386+K00922+K17454
Metabolism	Metabolism of cofactors and vitamins	Porphyrin and chlorophyll metabolism	6	54	0.508612	1	ko00860	ENSG00000188690;ENSG00000103415;ENSG00000165060;ENSG00000100292;ENSG00000139428;ENSG00000126088	K01719+K00510+K19054+K00510+K00798+K01599
Human Diseases	Substance dependence	Cocaine addiction	6	54	0.508612	1	ko05030	ENSG00000161509;ENSG00000131771;ENSG00000164885;ENSG00000128272;ENSG00000182158;ENSG00000125740	K05211+K15494+K02090+K04374+K09048+K09029
Metabolism	Amino acid metabolism	Tyrosine metabolism	4	35	0.510395	1	ko00350	ENSG00000131471;ENSG00000198650;ENSG00000104951;ENSG00000240972	K00276+K00815+K03334+K07253
Human Diseases	Infectious diseases	Bacterial invasion of epithelial cells	10	93	0.520971	1	ko05100	ENSG00000177105;ENSG00000050820;ENSG00000117461;ENSG00000130429;ENSG00000241553;ENSG00000122705;ENSG00000136950;ENSG00000175416;ENSG00000116670;ENSG00000121879	K07863+K05726+K02649+K05757+K05755+K04644+K05754+K04645+K13728+K00922
Environmental Information Processing	Signal transduction	TNF signaling pathway	15	142	0.534404	1	ko04668	ENSG00000117461;ENSG00000078747;ENSG00000115009;ENSG00000034152;ENSG00000172216;ENSG00000128272;ENSG00000100906;ENSG00000170345;ENSG00000078401;ENSG00000117020;ENSG00000182158;ENSG00000023445;ENSG00000232810;ENSG00000121879;ENSG00000082512	K02649+K05632+K14625+K04432+K10048+K04374+K04734+K04379+K16366+K04456+K09048+K16060+K03156+K00922+K09849
Organismal Systems	Nervous system	Cholinergic synapse	13	123	0.536957	1	ko04725	ENSG00000174775;ENSG00000167083;ENSG00000117461;ENSG00000174021;ENSG00000117013;ENSG00000128272;ENSG00000170345;ENSG00000172354;ENSG00000127920;ENSG00000117020;ENSG00000182158;ENSG00000168135;ENSG00000121879	K02833+K04549+K02649+K04542+K04929+K04374+K04379+K04537+K04546+K04456+K09048+K04998+K00922
Metabolism	Lipid metabolism	Ether lipid metabolism	5	46	0.539822	1	ko00565	ENSG00000168970;ENSG00000176485;ENSG00000079462;ENSG00000180089;ENSG00000141934	K16342+K16817+K16795+K18575+K01080
Genetic Information Processing	Translation	RNA transport	22	210	0.542677	1	ko03013	ENSG00000162385;ENSG00000162385;ENSG00000172336;ENSG00000162231;ENSG00000187840;ENSG00000183684;ENSG00000170473;ENSG00000150459;ENSG00000178718;ENSG00000243056;ENSG00000167272;ENSG00000205937;ENSG00000132661;ENSG00000100401;ENSG00000205609;ENSG00000205609;ENSG00000254535;ENSG00000241370;ENSG00000131652;ENSG00000130811;ENSG00000047410;ENSG00000131795	K12877+K12877+K14527+K14284+K07205+K12881+K14294+K14324+K14525+K18645+K03537+K14325+K14285+K14319+K03252+K03252+K13126+K03540+K13175+K03248+K09291+K12876
Organismal Systems	Endocrine system	Estrogen signaling pathway	15	143	0.54586	1	ko04915	ENSG00000174775;ENSG00000204388;ENSG00000204388;ENSG00000117461;ENSG00000204681;ENSG00000128272;ENSG00000113070;ENSG00000170345;ENSG00000117020;ENSG00000146648;ENSG00000126934;ENSG00000182158;ENSG00000121879;ENSG00000204389;ENSG00000204389	K02833+K03283+K03283+K02649+K04615+K04374+K08523+K04379+K04456+K04361+K04369+K09048+K00922+K03283+K03283
Metabolism	Glycan biosynthesis and metabolism	Glycosphingolipid biosynthesis - lacto and neolacto series	3	27	0.551539	1	ko00601	ENSG00000130383;ENSG00000176597;ENSG00000171124	K07633+K03766+K00716
Organismal Systems	Digestive system	Protein digestion and absorption	12	115	0.557553	1	ko04974	ENSG00000169031;ENSG00000164626;ENSG00000010438;ENSG00000168003;ENSG00000196549;ENSG00000106688;ENSG00000137731;ENSG00000018625;ENSG00000081052;ENSG00000141434;ENSG00000168542;ENSG00000112394	K06237+K04916+K01312+K06519+K01389+K05612+K01538+K01539+K06237+K08606+K06236+K08187
Human Diseases	Cancers	MicroRNAs in cancer	19	183	0.561034	1	ko05206	ENSG00000112715;ENSG00000100697;ENSG00000174775;ENSG00000185338;ENSG00000155130;ENSG00000115266;ENSG00000143590;ENSG00000168209;ENSG00000100292;ENSG00000149418;ENSG00000164045;ENSG00000124762;ENSG00000146648;ENSG00000126934;ENSG00000105173;ENSG00000100311;ENSG00000198625;ENSG00000121879;ENSG00000101412	K05448+K11592+K02833+K04694+K12561+K02085+K05462+K08270+K00510+K08670+K06645+K06625+K04361+K04369+K06626+K17386+K10127+K00922+K17454
Genetic Information Processing	Translation	mRNA surveillance pathway	13	125	0.561389	1	ko03015	ENSG00000162385;ENSG00000162385;ENSG00000160075;ENSG00000162231;ENSG00000172531;ENSG00000100836;ENSG00000183684;ENSG00000170473;ENSG00000150459;ENSG00000205937;ENSG00000132661;ENSG00000254535;ENSG00000131795	K12877+K12877+K15544+K14284+K06269+K14396+K12881+K14294+K14324+K14325+K14285+K13126+K12876
Cellular Processes	Cell motility	Regulation of actin cytoskeleton	25	241	0.56221	1	ko04810	ENSG00000083457;ENSG00000174775;ENSG00000172757;ENSG00000169750;ENSG00000050820;ENSG00000164171;ENSG00000117461;ENSG00000172531;ENSG00000115266;ENSG00000170458;ENSG00000147202;ENSG00000108518;ENSG00000205542;ENSG00000130429;ENSG00000241553;ENSG00000146648;ENSG00000136950;ENSG00000126934;ENSG00000101335;ENSG00000101306;ENSG00000100311;ENSG00000169896;ENSG00000121879;ENSG00000183856;ENSG00000115221	K06524+K02833+K05765+K07861+K05726+K06481+K02649+K06269+K02085+K04391+K05741+K05759+K05764+K05757+K05755+K04361+K05754+K04369+K12755+K00907+K17386+K06461+K00922+K05767+K06589
Environmental Information Processing	Signal transduction	Notch signaling pathway	6	57	0.563343	1	ko04330	ENSG00000184384;ENSG00000128917;ENSG00000090932;ENSG00000114315;ENSG00000205155;ENSG00000169733	K06061+K06051+K06051+K06054+K06170+K05948
Human Diseases	Cancers	Non-small cell lung cancer	8	77	0.570275	1	ko05223	ENSG00000002330;ENSG00000174775;ENSG00000117461;ENSG00000117020;ENSG00000146648;ENSG00000126934;ENSG00000121879;ENSG00000101412	K02158+K02833+K02649+K04456+K04361+K04369+K00922+K17454
Organismal Systems	Endocrine system	Oxytocin signaling pathway	19	184	0.571043	1	ko04921	XLOC_007068;ENSG00000168970;ENSG00000174775;ENSG00000117461;ENSG00000172531;ENSG00000142185;ENSG00000170345;ENSG00000124762;ENSG00000116741;ENSG00000146648;ENSG00000196465;ENSG00000126934;ENSG00000134072;ENSG00000101335;ENSG00000092841;ENSG00000101306;ENSG00000162409;ENSG00000168135;ENSG00000121879	K12319+K16342+K02833+K02649+K06269+K04977+K04379+K06625+K18154+K04361+K12751+K04369+K08794+K12755+K12751+K00907+K07198+K04998+K00922
Human Diseases	Endocrine and metabolic diseases	Maturity onset diabetes of the young	3	28	0.576964	1	ko04950	ENSG00000182759;ENSG00000106633;ENSG00000114315	K07595+K12407+K06054
Genetic Information Processing	Replication and repair	Non-homologous end-joining	2	18	0.578924	1	ko03450	ENSG00000168496;ENSG00000113522	K04799+K10866
Metabolism	Lipid metabolism	Primary bile acid biosynthesis	2	18	0.578924	1	ko00120	ENSG00000136881;ENSG00000083807	K00659+K08748
Human Diseases	Substance dependence	Amphetamine addiction	8	78	0.585411	1	ko05031	ENSG00000161509;ENSG00000172531;ENSG00000131771;ENSG00000128272;ENSG00000170345;ENSG00000198576;ENSG00000182158;ENSG00000125740	K05211+K06269+K15494+K04374+K04379+K15867+K09048+K09029
Environmental Information Processing	Signal transduction	cAMP signaling pathway	24	234	0.585648	1	ko04024	XLOC_021017;ENSG00000128271;ENSG00000002330;ENSG00000161509;ENSG00000169750;ENSG00000117461;ENSG00000182500;ENSG00000172531;ENSG00000204681;ENSG00000131771;ENSG00000100906;ENSG00000170345;ENSG00000058668;ENSG00000117020;ENSG00000104899;ENSG00000180616;ENSG00000126934;ENSG00000125398;ENSG00000182158;ENSG00000101335;ENSG00000137731;ENSG00000018625;ENSG00000105650;ENSG00000121879	K11265+K04266+K02158+K05211+K07861+K02649+K16056+K06269+K04615+K15494+K04734+K04379+K05850+K04456+K04665+K04218+K04369+K18435+K09048+K12755+K01538+K01539+K13293+K00922
Human Diseases	Infectious diseases	Vibrio cholerae infection	7	69	0.599043	1	ko05110	ENSG00000106803;ENSG00000171130;ENSG00000117410;ENSG00000159720;ENSG00000128524;ENSG00000113732;ENSG00000185883	K09481+K02153+K03661+K02146+K02151+K02153+K02155
Metabolism	Carbohydrate metabolism	Butanoate metabolism	3	29	0.601464	1	ko00650	ENSG00000127884;ENSG00000198754;ENSG00000166743	K07511+K01027+K01896
Metabolism	Carbohydrate metabolism	Glyoxylate and dicarboxylate metabolism	3	29	0.601464	1	ko00630	ENSG00000145020;ENSG00000146701;ENSG00000184207	K00605+K00026+K19269
Metabolism	Energy metabolism	Nitrogen metabolism	2	19	0.609064	1	ko00910	ENSG00000107159;ENSG00000074410	K01672+K01672
Metabolism	Carbohydrate metabolism	Amino sugar and nucleotide sugar metabolism	5	50	0.616281	1	ko00520	ENSG00000106633;ENSG00000159399;ENSG00000144591;ENSG00000108479;ENSG00000095380	K12407+K00844+K00966+K00849+K05304
Organismal Systems	Digestive system	Fat digestion and absorption	5	50	0.616281	1	ko04975	ENSG00000165029;ENSG00000169692;ENSG00000015520;ENSG00000141934;ENSG00000118137	K05641+K13509+K14461+K01080+K08757
Metabolism	Glycan biosynthesis and metabolism	Glycosylphosphatidylinositol(GPI)-anchor biosynthesis	3	30	0.625011	1	ko00563	ENSG00000165195;ENSG00000136908;ENSG00000197858	K03857+K09658+K05289
Human Diseases	Infectious diseases	Legionellosis	9	92	0.642339	1	ko05134	ENSG00000176171;ENSG00000204388;ENSG00000204388;ENSG00000170458;ENSG00000100906;ENSG00000232810;ENSG00000169896;ENSG00000204389;ENSG00000204389	K15464+K03283+K03283+K04391+K04734+K03156+K06461+K03283+K03283
Organismal Systems	Digestive system	Carbohydrate digestion and absorption	6	62	0.64745	1	ko04973	ENSG00000117461;ENSG00000117020;ENSG00000159399;ENSG00000137731;ENSG00000018625;ENSG00000121879	K02649+K04456+K00844+K01538+K01539+K00922
Metabolism	Metabolism of other amino acids	beta-Alanine metabolism	3	31	0.647584	1	ko00410	ENSG00000127884;ENSG00000131471;ENSG00000116649	K07511+K00276+K00797
Organismal Systems	Excretory system	Endocrine and other factor-regulated calcium reabsorption	5	52	0.65157	1	ko04961	ENSG00000042753;ENSG00000122705;ENSG00000137731;ENSG00000018625;ENSG00000175416	K11827+K04644+K01538+K01539+K04645
Environmental Information Processing	Signal transduction	cGMP - PKG signaling pathway	19	195	0.674661	1	ko04022	XLOC_007068;ENSG00000002330;ENSG00000064489;ENSG00000117461;ENSG00000138735;ENSG00000172531;ENSG00000128272;ENSG00000058668;ENSG00000116741;ENSG00000117020;ENSG00000126934;ENSG00000182158;ENSG00000101335;ENSG00000137731;ENSG00000018625;ENSG00000101306;ENSG00000121879;ENSG00000213999;ENSG00000213999	K12319+K02158+K09261+K02649+K13762+K06269+K04374+K05850+K18154+K04456+K04369+K09048+K12755+K01538+K01539+K00907+K00922+K09261+K09261
Organismal Systems	Endocrine system	Adipocytokine signaling pathway	9	95	0.68052	1	ko04920	ENSG00000118046;ENSG00000117394;ENSG00000104825;ENSG00000100906;ENSG00000117020;ENSG00000232810;ENSG00000162409;ENSG00000116678;ENSG00000169169	K07298+K07299+K02581+K04734+K04456+K03156+K07198+K05062+K19524
Human Diseases	Cancers	Pathways in cancer	46	462	0.68117	1	ko05200	ENSG00000135766;ENSG00000112715;ENSG00000002330;ENSG00000174775;ENSG00000167083;ENSG00000169750;ENSG00000117394;ENSG00000103363;ENSG00000164171;ENSG00000076604;ENSG00000169031;ENSG00000117461;ENSG00000174021;ENSG00000116016;ENSG00000089685;ENSG00000115266;ENSG00000129521;ENSG00000121966;ENSG00000123975;ENSG00000084207;ENSG00000100387;ENSG00000066336;ENSG00000269858;ENSG00000100906;ENSG00000101197…	K09592+K05448+K02158+K02833+K04549+K07861+K07299+K03873+K06481+K09848+K06237+K02649+K04542+K09095+K08731+K02085+K09592+K04189+K02219+K00799+K03868+K09438+K09592+K04734+K16061+K04379+K04537+K16859+K06625+K02159+K04546+K04456+K04361+K04369+K06626+K16060+K06237+K16798+K17386+K09291+K02219+K00922+K17454+K04674+K09849+K08803
Metabolism	Lipid metabolism	Fatty acid elongation	3	33	0.68978	1	ko00062	ENSG00000127884;ENSG00000097021;ENSG00000099797	K07511+K17360+K10258
Metabolism	Metabolism of cofactors and vitamins	Ubiquinone and other terpenoid-quinone biosynthesis	1	11	0.705843	1	ko00130	ENSG00000198650	K00815
Metabolism	Metabolism of other amino acids	Taurine and hypotaurine metabolism	1	11	0.705843	1	ko00430	ENSG00000136881	K00659
Metabolism	Lipid metabolism	Synthesis and degradation of ketone bodies	1	11	0.705843	1	ko00072	ENSG00000198754	K01027
Organismal Systems	Environmental adaptation	Circadian entrainment	10	110	0.733892	1	ko04713	XLOC_007068;XLOC_021017;ENSG00000161509;ENSG00000167083;ENSG00000108551;ENSG00000049246;ENSG00000174021;ENSG00000170345;ENSG00000172354;ENSG00000127920	K12319+K11265+K05211+K04549+K07843+K02633+K04542+K04379+K04537+K04546
Organismal Systems	Nervous system	Neurotrophin signaling pathway	13	142	0.743307	1	ko04722	ENSG00000242173;ENSG00000002330;ENSG00000174775;ENSG00000117461;ENSG00000141522;ENSG00000104825;ENSG00000128272;ENSG00000100906;ENSG00000087088;ENSG00000117020;ENSG00000126934;ENSG00000007264;ENSG00000121879	K12462+K02158+K02833+K02649+K12462+K02581+K04374+K04734+K02159+K04456+K04369+K08888+K00922
Environmental Information Processing	Signal transduction	Sphingolipid signaling pathway	13	142	0.743307	1	ko04071	ENSG00000177076;ENSG00000174775;ENSG00000169750;ENSG00000223802;ENSG00000176170;ENSG00000117461;ENSG00000033327;ENSG00000135587;ENSG00000087088;ENSG00000117020;ENSG00000126934;ENSG00000232810;ENSG00000121879	K01441+K02833+K07861+K04710+K04718+K02649+K08091+K12351+K02159+K04456+K04369+K03156+K00922
Cellular Processes	Cell growth and death	Apoptosis	10	112	0.754227	1	ko04210	ENSG00000002330;ENSG00000117461;ENSG00000100906;ENSG00000101197;ENSG00000087088;ENSG00000117020;ENSG00000023445;ENSG00000232810;ENSG00000167136;ENSG00000121879	K02158+K02649+K04734+K16061+K02159+K04456+K16060+K03156+K01173+K00922
Metabolism	Lipid metabolism	Fatty acid biosynthesis	1	13	0.764562	1	ko00061	ENSG00000100294	K00645
Metabolism	Xenobiotics biodegradation and metabolism	Metabolism of xenobiotics by cytochrome P450	8	92	0.765692	1	ko00980	XLOC_001234;ENSG00000184674;ENSG00000187134;ENSG00000084207;ENSG00000143819;ENSG00000148834;ENSG00000106258;ENSG00000065621	K15303+K00799+K00089+K00799+K01253+K00799+K17690+K00799
Metabolism	Lipid metabolism	Sphingolipid metabolism	5	60	0.770973	1	ko00600	ENSG00000177076;ENSG00000223802;ENSG00000176170;ENSG00000135587;ENSG00000141934	K01441+K04710+K04718+K12351+K01080
Human Diseases	Infectious diseases	Epstein-Barr virus infection	32	339	0.771521	1	ko05169	ENSG00000105258;ENSG00000104856;ENSG00000204435;ENSG00000204388;ENSG00000204388;ENSG00000126456;ENSG00000171453;ENSG00000117461;ENSG00000034152;ENSG00000099817;ENSG00000104825;ENSG00000161980;ENSG00000100142;ENSG00000165916;ENSG00000100413;ENSG00000013275;ENSG00000087191;ENSG00000066336;ENSG00000005075;ENSG00000106211;ENSG00000100906;ENSG00000127922;ENSG00000124762;ENSG00000117020;ENSG00000159352…	K03017+K09253+K03115+K03283+K03283+K05411+K03027+K02649+K04432+K03013+K02581+K03019+K03014+K03065+K03022+K03063+K03066+K09438+K03008+K04455+K04734+K10881+K06625+K04456+K03029+K03007+K00922+K03283+K03283+K09849+K06751+K15978
Metabolism	Glycan biosynthesis and metabolism	Glycosaminoglycan biosynthesis - heparan sulfate / heparin	2	26	0.775076	1	ko00534	ENSG00000149541;ENSG00000176022	K10158+K00734
Metabolism	Lipid metabolism	alpha-Linolenic acid metabolism	2	26	0.775076	1	ko00592	ENSG00000168970;ENSG00000176485	K16342+K16817
Metabolism	Global and Overview	Carbon metabolism	12	136	0.781785	1	ko01200	ENSG00000106633;ENSG00000127884;ENSG00000145020;ENSG00000092621;ENSG00000146701;ENSG00000130313;ENSG00000139410;ENSG00000159399;ENSG00000184207;ENSG00000177156;ENSG00000111674;ENSG00000177000	K12407+K07511+K00605+K00058+K00026+K01057+K17989+K00844+K19269+K00616+K01689+K00297
Organismal Systems	Digestive system	Vitamin digestion and absorption	2	27	0.792959	1	ko04977	ENSG00000107611;ENSG00000118137	K14616+K08757
Cellular Processes	Transport and catabolism	Regulation of autophagy	3	39	0.793383	1	ko04140	ENSG00000170296;ENSG00000162409;ENSG00000168397	K08341+K07198+K08342
Cellular Processes	Cellular commiunity	Focal adhesion	23	252	0.796575	1	ko04510	ENSG00000112715;ENSG00000002330;ENSG00000174775;ENSG00000169750;ENSG00000050820;ENSG00000164171;ENSG00000169031;ENSG00000117461;ENSG00000112576;ENSG00000172531;ENSG00000128591;ENSG00000159840;ENSG00000119630;ENSG00000117020;ENSG00000146648;ENSG00000101335;ENSG00000023445;ENSG00000081052;ENSG00000101306;ENSG00000100311;ENSG00000168542;ENSG00000121879;ENSG00000115221	K05448+K02158+K02833+K07861+K05726+K06481+K06237+K02649+K10152+K06269+K04437+K06273+K16859+K04456+K04361+K12755+K16060+K06237+K00907+K17386+K06236+K00922+K06589
Metabolism	Global and Overview	Biosynthesis of amino acids	7	85	0.804453	1	ko01230	ENSG00000092621;ENSG00000116984;ENSG00000139410;ENSG00000104524;ENSG00000198650;ENSG00000177156;ENSG00000111674	K00058+K00548+K17989+K00286+K00815+K00616+K01689
Human Diseases	Infectious diseases	Salmonella infection	9	107	0.806701	1	ko05132	ENSG00000177105;ENSG00000187240;ENSG00000128591;ENSG00000170458;ENSG00000108518;ENSG00000130429;ENSG00000241553;ENSG00000170345;ENSG00000136950	K07863+K10414+K04437+K04391+K05759+K05757+K05755+K04379+K05754
Cellular Processes	Cellular commiunity	Gap junction	9	107	0.806701	1	ko04540	XLOC_007068;ENSG00000174775;ENSG00000183785;ENSG00000188229;ENSG00000137267;ENSG00000146648;ENSG00000126934;ENSG00000100311;ENSG00000167553	K12319+K02833+K07374+K07375+K07375+K04361+K04369+K17386+K07374
Metabolism	Amino acid metabolism	Lysine degradation	5	63	0.806768	1	ko00310	XLOC_010794;ENSG00000127884;ENSG00000170364;ENSG00000152952;ENSG00000005483	K11433+K07511+K11433+K13645+K09189
Human Diseases	Cancers	Thyroid cancer	3	40	0.80751	1	ko05216	ENSG00000174775;ENSG00000126934;ENSG00000047410	K02833+K04369+K09291
Metabolism	Carbohydrate metabolism	Propanoate metabolism	2	28	0.809573	1	ko00640	ENSG00000127884;ENSG00000166796	K07511+K00016
Organismal Systems	Development	Axon guidance	12	140	0.813596	1	ko04360	ENSG00000172602;ENSG00000174775;ENSG00000172757;ENSG00000169750;ENSG00000095539;ENSG00000121966;ENSG00000164885;ENSG00000143590;ENSG00000185033;ENSG00000173156;ENSG00000136040;ENSG00000182511	K07531+K02833+K05765+K07861+K06521+K04189+K02090+K05462+K06521+K07530+K06572+K07527
Genetic Information Processing	Replication and repair	Nucleotide excision repair	6	75	0.814979	1	ko03420	ENSG00000106628;ENSG00000272047;ENSG00000106399;ENSG00000115350;ENSG00000100387;ENSG00000175482	K02328+K10845+K10740+K03506+K03868+K03505
Environmental Information Processing	Signal transduction	MAPK signaling pathway	29	318	0.82155	1	ko04010	ENSG00000168970;ENSG00000104856;ENSG00000174775;ENSG00000169750;ENSG00000130222;ENSG00000204388;ENSG00000204388;ENSG00000175197;ENSG00000139318;ENSG00000099860;ENSG00000130522;ENSG00000128591;ENSG00000170458;ENSG00000034152;ENSG00000128272;ENSG00000106211;ENSG00000170345;ENSG00000117020;ENSG00000146648;ENSG00000126934;ENSG00000130159;ENSG00000232810;ENSG00000158050;ENSG00000100311;ENSG00000123358…	K16342+K09253+K02833+K07861+K04402+K03283+K03283+K04452+K04459+K04402+K04449+K04437+K04391+K04432+K04374+K04455+K04379+K04456+K04361+K04369+K04405+K03156+K04459+K17386+K04465+K04674+K03283+K03283+K04402
Genetic Information Processing	Transcription	Basal transcription factors	5	66	0.837973	1	ko03022	ENSG00000197780;ENSG00000272047;ENSG00000147133;ENSG00000166337;ENSG00000162227	K03127+K10845+K03125+K03134+K03131
Metabolism	Lipid metabolism	Linoleic acid metabolism	2	30	0.839273	1	ko00591	ENSG00000168970;ENSG00000176485	K16342+K16817
Cellular Processes	Transport and catabolism	Endocytosis	33	363	0.840482	1	ko04144	XLOC_001105;XLOC_020908;XLOC_021441;ENSG00000171475;ENSG00000174775;ENSG00000159210;ENSG00000110195;ENSG00000204388;ENSG00000204388;ENSG00000102189;ENSG00000042753;ENSG00000078747;ENSG00000102981;ENSG00000121966;ENSG00000160948;ENSG00000130724;ENSG00000254505;ENSG00000176108;ENSG00000130429;ENSG00000241553;ENSG00000141971;ENSG00000146648;ENSG00000122705;ENSG00000136051;ENSG00000136950;ENSG0000015…	K18461+K06751+K06751+K19475+K02833+K12188+K13649+K03283+K03283+K12478+K11827+K05632+K06093+K04189+K12184+K12191+K12194+K12195+K05757+K05755+K12186+K04361+K04644+K18465+K05754+K12494+K07940+K04645+K12489+K04674+K03283+K03283+K06751
Organismal Systems	Endocrine system	PPAR signaling pathway	6	78	0.843079	1	ko03320	ENSG00000170231;ENSG00000164687;ENSG00000155368;ENSG00000083807;ENSG00000118137;ENSG00000169169	K08755+K08754+K08762+K08748+K08757+K19524
Organismal Systems	Endocrine system	Thyroid hormone synthesis	6	78	0.843079	1	ko04918	ENSG00000233276;ENSG00000128272;ENSG00000141505;ENSG00000182158;ENSG00000137731;ENSG00000018625	K00432+K04374+K10063+K09048+K01538+K01539
Metabolism	Amino acid metabolism	Valine, leucine and isoleucine degradation	4	55	0.844688	1	ko00280	ENSG00000072506;ENSG00000127884;ENSG00000198754;ENSG00000104951	K08683+K07511+K01027+K03334
Human Diseases	Infectious diseases	Hepatitis C	14	166	0.84515	1	ko05160	ENSG00000002330;ENSG00000174775;ENSG00000135828;ENSG00000126456;ENSG00000117461;ENSG00000184697;ENSG00000100906;ENSG00000124762;ENSG00000117020;ENSG00000146648;ENSG00000177300;ENSG00000232810;ENSG00000110651;ENSG00000121879	K02158+K02833+K01165+K05411+K02649+K06087+K04734+K06625+K04456+K04361+K06087+K03156+K06508+K00922
Organismal Systems	Immune system	Leukocyte transendothelial migration	12	145	0.848368	1	ko04670	ENSG00000050820;ENSG00000117461;ENSG00000184697;ENSG00000121966;ENSG00000074966;ENSG00000149564;ENSG00000002586;ENSG00000177300;ENSG00000101335;ENSG00000169896;ENSG00000121879;ENSG00000051523	K05726+K02649+K06087+K04189+K08016+K06787+K06520+K06087+K12755+K06461+K00922+K08009
Cellular Processes	Cellular commiunity	Adherens junction	7	91	0.856609	1	ko04520	ENSG00000204435;ENSG00000169750;ENSG00000124216;ENSG00000136153;ENSG00000146648;ENSG00000127329;ENSG00000106799	K03115+K07861+K05707+K06084+K04361+K05694+K04674
Organismal Systems	Endocrine system	Thyroid hormone signaling pathway	12	147	0.860787	1	ko04919	ENSG00000002330;ENSG00000174775;ENSG00000117394;ENSG00000117461;ENSG00000117020;ENSG00000126934;ENSG00000137731;ENSG00000018625;ENSG00000123836;ENSG00000160563;ENSG00000121879;ENSG00000112394	K02158+K02833+K07299+K02649+K04456+K04369+K01538+K01539+K19029+K15170+K00922+K08187
Metabolism	Global and Overview	Fatty acid metabolism	4	57	0.86399	1	ko01212	ENSG00000100294;ENSG00000127884;ENSG00000099797;ENSG00000169169	K00645+K07511+K10258+K19524
Metabolism	Metabolism of cofactors and vitamins	Pantothenate and CoA biosynthesis	1	18	0.865101	1	ko00770	ENSG00000138621	K01598
Environmental Information Processing	Signal transduction	PI3K-Akt signaling pathway	37	411	0.86816	1	ko04151	ENSG00000112715;ENSG00000002330;ENSG00000118046;ENSG00000174775;ENSG00000167083;ENSG00000167965;ENSG00000164171;ENSG00000105401;ENSG00000169031;ENSG00000117461;ENSG00000174021;ENSG00000112576;ENSG00000175634;ENSG00000104812;ENSG00000187840;ENSG00000143590;ENSG00000168209;ENSG00000128272;ENSG00000137154;ENSG00000172354;ENSG00000119630;ENSG00000124762;ENSG00000127920;ENSG00000117020;ENSG00000146648…	K05448+K02158+K07298+K02833+K04549+K08266+K06481+K09554+K06237+K02649+K04542+K10152+K04688+K00693+K07205+K05462+K08270+K04374+K02991+K04537+K16859+K06625+K04546+K04456+K04361+K04369+K06626+K09048+K06237+K07198+K17386+K04465+K05423+K13302+K06236+K00922+K06589
Metabolism	Lipid metabolism	Glycerophospholipid metabolism	9	116	0.873701	1	ko00564	ENSG00000168970;ENSG00000169692;ENSG00000102780;ENSG00000176485;ENSG00000103066;ENSG00000141934;ENSG00000133027;ENSG00000213398;ENSG00000011009	K16342+K13509+K00901+K16817+K06129+K01080+K00551+K00650+K06130
Metabolism	Carbohydrate metabolism	Pentose and glucuronate interconversions	3	46	0.876115	1	ko00040	XLOC_003388;ENSG00000085662;ENSG00000169738	K00011+K00011+K03331
Human Diseases	Cardiovascular diseases	Hypertrophic cardiomyopathy (HCM)	9	117	0.879819	1	ko05410	ENSG00000164171;ENSG00000198467;ENSG00000114854;ENSG00000078401;ENSG00000118194;ENSG00000232810;ENSG00000162409;ENSG00000159251;ENSG00000115221	K06481+K10374+K05865+K16366+K12045+K03156+K07198+K12314+K06589
Metabolism	Lipid metabolism	Fatty acid degradation	3	47	0.885164	1	ko00071	ENSG00000127884;ENSG00000167969;ENSG00000169169	K07511+K13238+K19524
Metabolism	Lipid metabolism	Glycerolipid metabolism	5	72	0.888	1	ko00561	XLOC_003388;ENSG00000169692;ENSG00000102780;ENSG00000085662;ENSG00000141934	K00011+K13509+K00901+K00011+K01080
Organismal Systems	Immune system	Toll-like receptor signaling pathway	11	141	0.888832	1	ko04620	ENSG00000126456;ENSG00000117461;ENSG00000170458;ENSG00000034152;ENSG00000243414;ENSG00000100906;ENSG00000170345;ENSG00000117020;ENSG00000126934;ENSG00000232810;ENSG00000121879	K05411+K02649+K04391+K04432+K05409+K04734+K04379+K04456+K04369+K03156+K00922
Organismal Systems	Endocrine system	Progesterone-mediated oocyte maturation	7	96	0.890903	1	ko04914	ENSG00000176386;ENSG00000117461;ENSG00000164045;ENSG00000117020;ENSG00000141552;ENSG00000116670;ENSG00000121879	K03359+K02649+K06645+K04456+K03358+K13728+K00922
Metabolism	Glycan biosynthesis and metabolism	Other types of O-glycan biosynthesis	2	35	0.896009	1	ko00514	ENSG00000112309;ENSG00000169733	K10157+K05948
Metabolism	Carbohydrate metabolism	Pentose phosphate pathway	2	35	0.896009	1	ko00030	ENSG00000130313;ENSG00000177156	K01057+K00616
Organismal Systems	Nervous system	Glutamatergic synapse	9	120	0.89673	1	ko04724	ENSG00000168970;ENSG00000161509;ENSG00000167083;ENSG00000174021;ENSG00000144935;ENSG00000172354;ENSG00000127920;ENSG00000106688;ENSG00000051128	K16342+K05211+K04549+K04542+K04964+K04537+K04546+K05612+K15010
Organismal Systems	Immune system	T cell receptor signaling pathway	10	132	0.900077	1	ko04660	ENSG00000174775;ENSG00000117461;ENSG00000104825;ENSG00000100906;ENSG00000170345;ENSG00000117020;ENSG00000126934;ENSG00000232810;ENSG00000135605;ENSG00000121879	K02833+K02649+K02581+K04734+K04379+K04456+K04369+K03156+K07364+K00922
Organismal Systems	Development	Osteoclast differentiation	17	210	0.902574	1	ko04380	ENSG00000104856;ENSG00000185338;ENSG00000117461;ENSG00000130522;ENSG00000033327;ENSG00000066336;ENSG00000100906;ENSG00000170345;ENSG00000120659;ENSG00000117020;ENSG00000125740;ENSG00000232810;ENSG00000135605;ENSG00000075426;ENSG00000121879;ENSG00000106799;ENSG00000051523	K09253+K04694+K02649+K04449+K08091+K09438+K04734+K04379+K05473+K04456+K09029+K03156+K07364+K09030+K00922+K04674+K08009
Organismal Systems	Endocrine system	Regulation of lipolysis in adipocyte	4	62	0.903461	1	ko04923	ENSG00000176485;ENSG00000117461;ENSG00000117020;ENSG00000121879	K16817+K02649+K04456+K00922
Organismal Systems	Nervous system	Long-term potentiation	5	75	0.907608	1	ko04720	ENSG00000161509;ENSG00000174775;ENSG00000172531;ENSG00000128272;ENSG00000126934	K05211+K02833+K06269+K04374+K04369
Organismal Systems	Immune system	NOD-like receptor signaling pathway	5	76	0.913442	1	ko04621	ENSG00000104825;ENSG00000100906;ENSG00000023445;ENSG00000232810;ENSG00000187796	K02581+K04734+K16060+K03156+K12794
Organismal Systems	Immune system	Platelet activation	13	169	0.914528	1	ko04611	XLOC_007068;ENSG00000168970;ENSG00000118640;ENSG00000164171;ENSG00000117461;ENSG00000182500;ENSG00000172531;ENSG00000149781;ENSG00000117020;ENSG00000101306;ENSG00000203618;ENSG00000168542;ENSG00000121879	K12319+K16342+K08512+K06481+K02649+K16056+K06269+K17084+K04456+K00907+K06262+K06236+K00922
Cellular Processes	Cell growth and death	Oocyte meiosis	9	124	0.916148	1	ko04114	ENSG00000176386;ENSG00000117399;ENSG00000172531;ENSG00000077935;ENSG00000100387;ENSG00000164611;ENSG00000141552;ENSG00000105173;ENSG00000116670	K03359+K03363+K06269+K06636+K03868+K06635+K03358+K06626+K13728
Organismal Systems	Nervous system	Dopaminergic synapse	11	147	0.916597	1	ko04728	ENSG00000167083;ENSG00000174021;ENSG00000172531;ENSG00000131771;ENSG00000128272;ENSG00000170345;ENSG00000172354;ENSG00000127920;ENSG00000117020;ENSG00000182158;ENSG00000130643	K04549+K04542+K06269+K15494+K04374+K04379+K04537+K04546+K04456+K09048+K15493
Organismal Systems	Circulatory system	Adrenergic signaling in cardiomyocytes	14	181	0.91774	1	ko04261	ENSG00000117461;ENSG00000172531;ENSG00000198336;ENSG00000198467;ENSG00000114854;ENSG00000128272;ENSG00000058668;ENSG00000117020;ENSG00000118194;ENSG00000182158;ENSG00000137731;ENSG00000018625;ENSG00000159251;ENSG00000121879	K02649+K06269+K12750+K10374+K05865+K04374+K05850+K04456+K12045+K09048+K01538+K01539+K12314+K00922
Metabolism	Carbohydrate metabolism	Starch and sucrose metabolism	5	77	0.91895	1	ko00500	ENSG00000106633;ENSG00000114480;ENSG00000068976;ENSG00000104812;ENSG00000159399	K12407+K00700+K00688+K00693+K00844
Metabolism	Metabolism of cofactors and vitamins	Retinol metabolism	5	77	0.91895	1	ko00830	ENSG00000121039;ENSG00000106258;ENSG00000187630;ENSG00000187630;ENSG00000157326	K11151+K17690+K11147+K11147+K11147
Metabolism	Amino acid metabolism	Alanine, aspartate and glutamate metabolism	2	38	0.920455	1	ko00250	ENSG00000177181;ENSG00000104951	K18311+K03334
Organismal Systems	Immune system	RIG-I-like receptor signaling pathway	6	90	0.922803	1	ko04622	ENSG00000126456;ENSG00000104825;ENSG00000100906;ENSG00000187608;ENSG00000232810;ENSG00000127445	K05411+K02581+K04734+K12159+K03156+K09578
Organismal Systems	Endocrine system	GnRH signaling pathway	7	103	0.927114	1	ko04912	ENSG00000168970;ENSG00000174775;ENSG00000034152;ENSG00000128272;ENSG00000113070;ENSG00000146648;ENSG00000126934	K16342+K02833+K04432+K04374+K08523+K04361+K04369
Metabolism	Lipid metabolism	Arachidonic acid metabolism	4	66	0.927369	1	ko00590	ENSG00000168970;ENSG00000176485;ENSG00000233276;ENSG00000148334	K16342+K16817+K00432+K05309
Human Diseases	Infectious diseases	Amoebiasis	10	139	0.929994	1	ko05146	ENSG00000158473;ENSG00000169031;ENSG00000117461;ENSG00000170458;ENSG00000106211;ENSG00000081052;ENSG00000232810;ENSG00000169896;ENSG00000168542;ENSG00000121879	K06448+K06237+K02649+K04391+K04455+K06237+K03156+K06461+K06236+K00922
Organismal Systems	Circulatory system	Vascular smooth muscle contraction	11	151	0.931659	1	ko04270	XLOC_007068;ENSG00000168970;ENSG00000128271;ENSG00000172531;ENSG00000163273;ENSG00000078401;ENSG00000196465;ENSG00000126934;ENSG00000101335;ENSG00000092841;ENSG00000101306	K12319+K16342+K04266+K06269+K12336+K16366+K12751+K04369+K12755+K12751+K00907
Organismal Systems	Immune system	Hematopoietic cell lineage	9	128	0.932368	1	ko04640	ENSG00000158473;ENSG00000164171;ENSG00000095752;ENSG00000170458;ENSG00000196549;ENSG00000232810;ENSG00000169896;ENSG00000108342;ENSG00000203618	K06448+K06481+K05417+K04391+K01389+K03156+K06461+K05423+K06262
Organismal Systems	Endocrine system	Insulin secretion	6	93	0.936079	1	ko04911	ENSG00000106633;ENSG00000117394;ENSG00000128272;ENSG00000182158;ENSG00000137731;ENSG00000018625	K12407+K07299+K04374+K09048+K01538+K01539
Organismal Systems	Nervous system	Long-term depression	4	68	0.937199	1	ko04730	XLOC_007068;ENSG00000168970;ENSG00000174775;ENSG00000126934	K12319+K16342+K02833+K04369
Metabolism	Lipid metabolism	Steroid biosynthesis	1	25	0.93818	1	ko00100	XLOC_002898	K13373
Metabolism	Carbohydrate metabolism	Inositol phosphate metabolism	5	82	0.942094	1	ko00562	ENSG00000108389;ENSG00000137825;ENSG00000114805;ENSG00000121879;ENSG00000151151	K18082+K00911+K19006+K00922+K00915
Metabolism	Glycan biosynthesis and metabolism	Other glycan degradation	1	26	0.944704	1	ko00511	ENSG00000169660	K14459
Metabolism	Amino acid metabolism	Tryptophan metabolism	2	42	0.94472	1	ko00380	ENSG00000127884;ENSG00000104951	K07511+K03334
Human Diseases	Infectious diseases	Measles	14	190	0.945732	1	ko05162	ENSG00000204435;ENSG00000204388;ENSG00000204388;ENSG00000204628;ENSG00000126456;ENSG00000117461;ENSG00000112576;ENSG00000104825;ENSG00000100906;ENSG00000117020;ENSG00000105173;ENSG00000121879;ENSG00000204389;ENSG00000204389	K03115+K03283+K03283+K14753+K05411+K02649+K10152+K02581+K04734+K04456+K06626+K00922+K03283+K03283
Metabolism	Xenobiotics biodegradation and metabolism	Drug metabolism - cytochrome P450	5	83	0.945938	1	ko00982	ENSG00000184674;ENSG00000084207;ENSG00000148834;ENSG00000106258;ENSG00000065621	K00799+K00799+K00799+K17690+K00799
Environmental Information Processing	Signal transduction	NF-kappa B signaling pathway	10	144	0.946329	1	ko04064	ENSG00000104856;ENSG00000204435;ENSG00000099860;ENSG00000170458;ENSG00000243414;ENSG00000100906;ENSG00000120659;ENSG00000023445;ENSG00000232810;ENSG00000082512	K09253+K03115+K04402+K04391+K05409+K04734+K05473+K16060+K03156+K09849
Human Diseases	Cancers	Chemical carcinogenesis	6	96	0.947288	1	ko05204	ENSG00000184674;ENSG00000084207;ENSG00000143819;ENSG00000148834;ENSG00000106258;ENSG00000065621	K00799+K00799+K01253+K00799+K17690+K00799
Metabolism	Xenobiotics biodegradation and metabolism	Drug metabolism - other enzymes	3	57	0.947871	1	ko00983	ENSG00000125877;ENSG00000167900;ENSG00000025708	K01519+K00857+K00758
Human Diseases	Infectious diseases	HTLV-I infection	34	412	0.95144	1	ko05166	ENSG00000176386;ENSG00000104856;ENSG00000174775;ENSG00000106628;ENSG00000117394;ENSG00000117399;ENSG00000099901;ENSG00000117461;ENSG00000120738;ENSG00000112576;ENSG00000115350;ENSG00000115266;ENSG00000162772;ENSG00000100300;ENSG00000128272;ENSG00000175482;ENSG00000164611;ENSG00000066336;ENSG00000132522;ENSG00000100906;ENSG00000170345;ENSG00000163132;ENSG00000124762;ENSG00000087088;ENSG00000117020…	K03359+K09253+K02833+K02328+K07299+K03363+K15306+K02649+K09203+K10152+K03506+K02085+K09032+K05770+K04374+K03505+K06635+K09438+K15307+K04734+K04379+K09341+K06625+K02159+K04456+K03358+K06752+K15310+K03156+K17386+K00922+K17454+K04674+K06751
Environmental Information Processing	Signal transduction	Hippo signaling pathway	12	170	0.95323	1	ko04390	ENSG00000112576;ENSG00000172531;ENSG00000089685;ENSG00000115266;ENSG00000102981;ENSG00000118523;ENSG00000115738;ENSG00000104899;ENSG00000109321;ENSG00000142279;ENSG00000074047;ENSG00000106799	K10152+K06269+K08731+K02085+K06093+K06827+K17693+K04665+K09782+K16682+K16798+K04674
Environmental Information Processing	Signal transduction	Ras signaling pathway	20	262	0.955674	1	ko04014	ENSG00000112715;ENSG00000168970;ENSG00000002330;ENSG00000174775;ENSG00000167083;ENSG00000169750;ENSG00000176485;ENSG00000117461;ENSG00000174021;ENSG00000033327;ENSG00000143590;ENSG00000172354;ENSG00000119630;ENSG00000127920;ENSG00000117020;ENSG00000146648;ENSG00000126934;ENSG00000100311;ENSG00000121879;ENSG00000197283	K05448+K16342+K02158+K02833+K04549+K07861+K16817+K02649+K04542+K08091+K05462+K04537+K16859+K04546+K04456+K04361+K04369+K17386+K00922+K17631
Metabolism	Carbohydrate metabolism	Pyruvate metabolism	2	45	0.958106	1	ko00620	ENSG00000166796;ENSG00000146701	K00016+K00026
Genetic Information Processing	Translation	Aminoacyl-tRNA biosynthesis	3	60	0.959263	1	ko00970	ENSG00000115866;ENSG00000109618;ENSG00000162396	K01876+K03341+K01881
Organismal Systems	Nervous system	GABAergic synapse	6	100	0.959484	1	ko04727	ENSG00000167083;ENSG00000170296;ENSG00000174021;ENSG00000204681;ENSG00000172354;ENSG00000127920	K04549+K08341+K04542+K04615+K04537+K04546
Organismal Systems	Endocrine system	Aldosterone synthesis and secretion	6	100	0.959484	1	ko04925	ENSG00000164535;ENSG00000182500;ENSG00000128272;ENSG00000134072;ENSG00000182158;ENSG00000123358	K13806+K16056+K04374+K08794+K09048+K04465
Cellular Processes	Transport and catabolism	Lysosome	10	151	0.963558	1	ko04142	ENSG00000090674;ENSG00000103066;ENSG00000117410;ENSG00000135404;ENSG00000159720;ENSG00000122705;ENSG00000119655;ENSG00000129354;ENSG00000175416;ENSG00000185883	K04992+K06129+K03661+K06497+K02146+K04644+K13443+K12393+K04645+K02155
Cellular Processes	Cellular commiunity	Signaling pathways regulating pluripotency of stem cells	11	163	0.963662	1	ko04550	ENSG00000174775;ENSG00000117461;ENSG00000115266;ENSG00000016082;ENSG00000172201;ENSG00000114739;ENSG00000115738;ENSG00000117020;ENSG00000126934;ENSG00000117318;ENSG00000121879	K02833+K02649+K02085+K09370+K17695+K13596+K17693+K04456+K04369+K17694+K00922
Human Diseases	Substance dependence	Morphine addiction	6	102	0.964567	1	ko05032	ENSG00000167083;ENSG00000174021;ENSG00000204681;ENSG00000172354;ENSG00000127920;ENSG00000105650	K04549+K04542+K04615+K04537+K04546+K13293
Human Diseases	Infectious diseases	Pertussis	8	129	0.968409	1	ko05133	ENSG00000172757;ENSG00000126456;ENSG00000170458;ENSG00000106804;ENSG00000243414;ENSG00000170345;ENSG00000232810;ENSG00000169896	K05765+K05411+K04391+K03994+K05409+K04379+K03156+K06461
Environmental Information Processing	Signal transduction	Rap1 signaling pathway	17	236	0.968938	1	ko04015	ENSG00000112715;ENSG00000128271;ENSG00000174775;ENSG00000169750;ENSG00000050820;ENSG00000117461;ENSG00000102981;ENSG00000034152;ENSG00000143590;ENSG00000108518;ENSG00000119630;ENSG00000117020;ENSG00000146648;ENSG00000126934;ENSG00000100311;ENSG00000169896;ENSG00000121879	K05448+K04266+K02833+K07861+K05726+K02649+K06093+K04432+K05462+K05759+K16859+K04456+K04361+K04369+K17386+K06461+K00922
Human Diseases	Cancers	Proteoglycans in cancer	17	236	0.968938	1	ko05205	ENSG00000112715;ENSG00000174775;ENSG00000164171;ENSG00000168101;ENSG00000117461;ENSG00000172531;ENSG00000175634;ENSG00000128591;ENSG00000137154;ENSG00000113070;ENSG00000124762;ENSG00000135404;ENSG00000117020;ENSG00000146648;ENSG00000126934;ENSG00000232810;ENSG00000121879	K05448+K02833+K06481+K16867+K02649+K06269+K04688+K04437+K02991+K08523+K06625+K06497+K04456+K04361+K04369+K03156+K00922
Metabolism	Carbohydrate metabolism	Glycolysis / Gluconeogenesis	4	78	0.970483	1	ko00010	ENSG00000106633;ENSG00000166796;ENSG00000159399;ENSG00000111674	K12407+K00016+K00844+K01689
Human Diseases	Immune diseases	Rheumatoid arthritis	13	192	0.972654	1	ko05323	ENSG00000112715;ENSG00000095752;ENSG00000115009;ENSG00000170345;ENSG00000171130;ENSG00000120659;ENSG00000117410;ENSG00000159720;ENSG00000204252;ENSG00000128524;ENSG00000232810;ENSG00000113732;ENSG00000185883	K05448+K05417+K14625+K04379+K02153+K05473+K03661+K02146+K06752+K02151+K03156+K02153+K02155
Environmental Information Processing	Signal transduction	Hedgehog signaling pathway	2	51	0.976166	1	ko04340	ENSG00000163501;ENSG00000074047	K11989+K16798
Human Diseases	Cardiovascular diseases	Dilated cardiomyopathy (DCM)	7	121	0.976529	1	ko05414	ENSG00000164171;ENSG00000198467;ENSG00000114854;ENSG00000118194;ENSG00000232810;ENSG00000159251;ENSG00000115221	K06481+K10374+K05865+K12045+K03156+K12314+K06589
Organismal Systems	Development	Dorso-ventral axis formation	1	34	0.977355	1	ko04320	ENSG00000146648	K04361
Metabolism	Glycan biosynthesis and metabolism	Mucin type O-glycan biosynthesis	1	34	0.977355	1	ko00512	ENSG00000187210	K00727
Organismal Systems	Digestive system	Salivary secretion	6	111	0.980978	1	ko04970	XLOC_007068;ENSG00000039987;ENSG00000101439;ENSG00000058668;ENSG00000137731;ENSG00000018625	K12319+K13879+K13899+K05850+K01538+K01539
Organismal Systems	Immune system	Chemokine signaling pathway	15	223	0.98142	1	ko04062	ENSG00000160683;ENSG00000174775;ENSG00000167083;ENSG00000151882;ENSG00000050820;ENSG00000117461;ENSG00000174021;ENSG00000121966;ENSG00000115009;ENSG00000104825;ENSG00000100906;ENSG00000172354;ENSG00000127920;ENSG00000117020;ENSG00000121879	K04190+K02833+K04549+K05513+K05726+K02649+K04542+K04189+K14625+K02581+K04734+K04537+K04546+K04456+K00922
Organismal Systems	Nervous system	Serotonergic synapse	7	125	0.98205	1	ko04726	ENSG00000168970;ENSG00000174775;ENSG00000167083;ENSG00000174021;ENSG00000144935;ENSG00000172354;ENSG00000127920	K16342+K02833+K04549+K04542+K04964+K04537+K04546
Environmental Information Processing	Signaling molecules and interaction	ECM-receptor interaction	7	125	0.98205	1	ko04512	ENSG00000164171;ENSG00000169031;ENSG00000072571;ENSG00000081052;ENSG00000203618;ENSG00000168542;ENSG00000115221	K06481+K06237+K06267+K06237+K06262+K06236+K06589
Organismal Systems	Endocrine system	Ovarian Steroidogenesis	2	56	0.985227	1	ko04913	XLOC_002898;ENSG00000168970	K13373+K16342
Organismal Systems	Sensory system	Inflammatory mediator regulation of TRP channels	6	115	0.985704	1	ko04750	ENSG00000168970;ENSG00000117461;ENSG00000172531;ENSG00000104321;ENSG00000034152;ENSG00000121879	K16342+K02649+K06269+K04984+K04432+K00922
Environmental Information Processing	Signal transduction	Phosphatidylinositol signaling system	6	116	0.986701	1	ko04070	ENSG00000108389;ENSG00000102780;ENSG00000117461;ENSG00000137825;ENSG00000121879;ENSG00000151151	K18082+K00901+K02649+K00911+K00922+K00915
Human Diseases	Substance dependence	Nicotine addiction	1	41	0.989639	1	ko05033	ENSG00000161509	K05211
Human Diseases	Cancers	Basal cell carcinoma	2	60	0.989971	1	ko05217	ENSG00000115266;ENSG00000074047	K02085+K16798
Human Diseases	Infectious diseases	Toxoplasmosis	16	247	0.990239	1	ko05145	ENSG00000002330;ENSG00000185338;ENSG00000204388;ENSG00000204388;ENSG00000117461;ENSG00000034152;ENSG00000104825;ENSG00000100906;ENSG00000101197;ENSG00000117020;ENSG00000204252;ENSG00000023445;ENSG00000232810;ENSG00000121879;ENSG00000204389;ENSG00000204389	K02158+K04694+K03283+K03283+K02649+K04432+K02581+K04734+K16061+K04456+K06752+K16060+K03156+K00922+K03283+K03283
Human Diseases	Cardiovascular diseases	Arrhythmogenic right ventricular cardiomyopathy (ARVC)	4	92	0.99039	1	ko05412	ENSG00000046604;ENSG00000164171;ENSG00000134755;ENSG00000115221	K07597+K06481+K07601+K06589
Metabolism	Carbohydrate metabolism	Citrate cycle (TCA cycle)	1	42	0.990735	1	ko00020	ENSG00000146701	K00026
Organismal Systems	Nervous system	Retrograde endocannabinoid signaling	5	107	0.990774	1	ko04723	ENSG00000167083;ENSG00000164535;ENSG00000174021;ENSG00000172354;ENSG00000127920	K04549+K13806+K04542+K04537+K04546
Cellular Processes	Transport and catabolism	Phagosome	23	332	0.991382	1	ko04145	XLOC_020908;XLOC_021441;ENSG00000183785;ENSG00000188229;ENSG00000164171;ENSG00000106803;ENSG00000102189;ENSG00000187240;ENSG00000102879;ENSG00000170458;ENSG00000137267;ENSG00000038945;ENSG00000171130;ENSG00000117410;ENSG00000159720;ENSG00000204252;ENSG00000128524;ENSG00000169896;ENSG00000167553;ENSG00000113732;ENSG00000051523;ENSG00000234745;ENSG00000185883	K06751+K06751+K07374+K07375+K06481+K09481+K12478+K10414+K13882+K04391+K07375+K06558+K02153+K03661+K02146+K06752+K02151+K06461+K07374+K02153+K08009+K06751+K02155
Organismal Systems	Digestive system	Pancreatic secretion	5	108	0.991466	1	ko04972	ENSG00000144935;ENSG00000010438;ENSG00000058668;ENSG00000137731;ENSG00000018625	K04964+K01312+K05850+K01538+K01539
Organismal Systems	Endocrine system	Renin secretion	3	79	0.992098	1	ko04924	XLOC_001628;XLOC_007068;ENSG00000182500	K01380+K12319+K16056
Metabolism	Lipid metabolism	Steroid hormone biosynthesis	3	81	0.993394	1	ko00140	XLOC_002898;ENSG00000187134;ENSG00000106258	K13373+K00089+K17690
Human Diseases	Infectious diseases	Chagas disease (American trypanosomiasis)	7	145	0.995641	1	ko05142	ENSG00000117461;ENSG00000100906;ENSG00000170345;ENSG00000117020;ENSG00000232810;ENSG00000121879;ENSG00000106799	K02649+K04734+K04379+K04456+K03156+K00922+K04674
Human Diseases	Immune diseases	Primary immunodeficiency	3	87	0.996163	1	ko05340	ENSG00000105369;ENSG00000182500;ENSG00000064490	K06506+K16056+K08062
Environmental Information Processing	Signal transduction	Wnt signaling pathway	7	151	0.99721	1	ko04310	ENSG00000204435;ENSG00000169750;ENSG00000112576;ENSG00000115266;ENSG00000100387;ENSG00000181274;ENSG00000095739	K03115+K07861+K10152+K02085+K03868+K03096+K10162
Organismal Systems	Immune system	Complement and coagulation cascades	5	122	0.997218	1	ko04610	ENSG00000197766;ENSG00000131187;ENSG00000106804;ENSG00000117601;ENSG00000117525	K01334+K01328+K03994+K03911+K03901
Organismal Systems	Digestive system	Gastric acid secretion	3	91	0.997342	1	ko04971	ENSG00000180616;ENSG00000018625;ENSG00000101306	K04218+K01539+K00907
Organismal Systems	Endocrine system	Melanogenesis	4	111	0.99809	1	ko04916	ENSG00000174775;ENSG00000078401;ENSG00000126934;ENSG00000182158	K02833+K16366+K04369+K09048
Human Diseases	Infectious diseases	Leishmaniasis	8	171	0.998208	1	ko05140	ENSG00000104825;ENSG00000175130;ENSG00000100906;ENSG00000170345;ENSG00000204252;ENSG00000232810;ENSG00000169896;ENSG00000051523	K02581+K13536+K04734+K04379+K06752+K03156+K06461+K08009
Environmental Information Processing	Signal transduction	Jak-STAT signaling pathway	9	185	0.998225	1	ko04630	ENSG00000185338;ENSG00000095752;ENSG00000117461;ENSG00000112576;ENSG00000164056;ENSG00000117020;ENSG00000108342;ENSG00000116678;ENSG00000121879	K04694+K05417+K02649+K10152+K04704+K04456+K05423+K05062+K00922
Human Diseases	Infectious diseases	Influenza A	19	318	0.998583	1	ko05164	ENSG00000204388;ENSG00000204388;ENSG00000135828;ENSG00000126456;ENSG00000117461;ENSG00000162231;ENSG00000100836;ENSG00000034152;ENSG00000104825;ENSG00000010438;ENSG00000100906;ENSG00000117020;ENSG00000132661;ENSG00000126934;ENSG00000204252;ENSG00000232810;ENSG00000121879;ENSG00000204389;ENSG00000204389	K03283+K03283+K01165+K05411+K02649+K14284+K14396+K04432+K02581+K01312+K04734+K04456+K14285+K04369+K06752+K03156+K00922+K03283+K03283
Environmental Information Processing	Signal transduction	Calcium signaling pathway	10	202	0.998598	1	ko04020	ENSG00000128271;ENSG00000161509;ENSG00000176170;ENSG00000182500;ENSG00000137825;ENSG00000114854;ENSG00000058668;ENSG00000146648;ENSG00000101306;ENSG00000156873	K04266+K05211+K04718+K16056+K00911+K05865+K05850+K04361+K00907+K00871
Organismal Systems	Sensory system	Taste transduction	2	82	0.998874	1	ko04742	ENSG00000127366;ENSG00000158445	K08474+K04885
Environmental Information Processing	Membrane transport	ABC transporters	1	62	0.999012	1	ko02010	ENSG00000165029	K05641
Cellular Processes	Cellular commiunity	Tight junction	7	165	0.999047	1	ko04530	ENSG00000204435;ENSG00000174775;ENSG00000184697;ENSG00000102981;ENSG00000117020;ENSG00000177300;ENSG00000101335	K03115+K02833+K06087+K06093+K04456+K06087+K12755
Human Diseases	Infectious diseases	Herpes simplex infection	22	365	0.999199	1	ko05168	ENSG00000197780;ENSG00000204435;ENSG00000135828;ENSG00000049246;ENSG00000126456;ENSG00000162231;ENSG00000172531;ENSG00000104529;ENSG00000126759;ENSG00000099804;ENSG00000104825;ENSG00000183684;ENSG00000106804;ENSG00000100906;ENSG00000170345;ENSG00000105373;ENSG00000166337;ENSG00000204252;ENSG00000232810;ENSG00000162227;ENSG00000082512;ENSG00000234745	K03127+K03115+K01165+K02633+K05411+K14284+K06269+K15410+K15412+K02207+K02581+K12881+K03994+K04734+K04379+K14840+K03134+K06752+K03156+K03131+K09849+K06751
Human Diseases	Infectious diseases	Tuberculosis	16	296	0.999467	1	ko05152	ENSG00000002330;ENSG00000176170;ENSG00000102189;ENSG00000102879;ENSG00000170458;ENSG00000172216;ENSG00000117410;ENSG00000087088;ENSG00000159720;ENSG00000117020;ENSG00000204252;ENSG00000064490;ENSG00000232810;ENSG00000187796;ENSG00000169896;ENSG00000185883	K02158+K04718+K12478+K13882+K04391+K10048+K03661+K02159+K02146+K04456+K06752+K08062+K03156+K12794+K06461+K02155
Human Diseases	Infectious diseases	Staphylococcus aureus infection	6	176	0.99989	1	ko05150	ENSG00000186395;ENSG00000110876;ENSG00000197766;ENSG00000106804;ENSG00000204252;ENSG00000169896	K07604+K06544+K01334+K03994+K06752+K06461
Environmental Information Processing	Signaling molecules and interaction	Cytokine-cytokine receptor interaction	17	334	0.999896	1	ko04060	ENSG00000112715;ENSG00000160683;ENSG00000151882;ENSG00000095752;ENSG00000121966;ENSG00000115009;ENSG00000186891;ENSG00000243509;ENSG00000120659;ENSG00000114739;ENSG00000146648;ENSG00000104899;ENSG00000232810;ENSG00000100311;ENSG00000108342;ENSG00000116678;ENSG00000106799	K05448+K04190+K05513+K05417+K04189+K14625+K05154+K05143+K05473+K13596+K04361+K04665+K03156+K17386+K05423+K05062+K04674
Organismal Systems	Immune system	Intestinal immune network for IgA production	3	125	0.999896	1	ko04672	ENSG00000151882;ENSG00000121966;ENSG00000204252	K05513+K04189+K06752
Organismal Systems	Immune system	Antigen processing and presentation	13	282	0.999911	1	ko04612	XLOC_020908;XLOC_021441;ENSG00000204388;ENSG00000204388;ENSG00000092010;ENSG00000100911;ENSG00000204252;ENSG00000064490;ENSG00000232810;ENSG00000204389;ENSG00000204389;ENSG00000216490;ENSG00000234745	K06751+K06751+K03283+K03283+K06696+K06697+K06752+K08062+K03156+K03283+K03283+K08059+K06751
Human Diseases	Immune diseases	Asthma	2	110	0.999937	1	ko05310	ENSG00000204252;ENSG00000232810	K06752+K03156
Environmental Information Processing	Signaling molecules and interaction	Neuroactive ligand-receptor interaction	16	332	0.999952	1	ko04080	ENSG00000128271;ENSG00000161509;ENSG00000139574;ENSG00000182687;ENSG00000178623;ENSG00000204681;ENSG00000176136;ENSG00000166863;ENSG00000100300;ENSG00000123901;ENSG00000010438;ENSG00000241563;ENSG00000180616;ENSG00000129749;ENSG00000244165;ENSG00000116678	K04266+K05211+K05247+K04231+K04276+K04615+K04203+K05240+K05770+K04210+K01312+K05238+K04218+K04811+K08387+K05062
Human Diseases	Immune diseases	Inflammatiory bowel disease (IBD)	4	155	0.999966	1	ko05321	ENSG00000069667;ENSG00000204252;ENSG00000112116;ENSG00000232810	K08532+K06752+K05494+K03156
Environmental Information Processing	Signaling molecules and interaction	Cell adhesion molecules (CAMs)	11	270	0.999974	1	ko04514	XLOC_020908;XLOC_021441;ENSG00000110876;ENSG00000184697;ENSG00000149564;ENSG00000002586;ENSG00000177300;ENSG00000204252;ENSG00000169896;ENSG00000108622;ENSG00000234745	K06751+K06751+K06544+K06087+K06787+K06520+K06087+K06752+K06461+K06523+K06751
Organismal Systems	Immune system	Natural killer cell mediated cytotoxicity	11	271	0.999976	1	ko04650	XLOC_020908;XLOC_021441;ENSG00000174775;ENSG00000169750;ENSG00000117461;ENSG00000087266;ENSG00000126934;ENSG00000232810;ENSG00000108622;ENSG00000121879;ENSG00000234745	K06751+K06751+K02833+K07861+K02649+K07984+K04369+K03156+K06523+K00922+K06751
Human Diseases	Immune diseases	Allograft rejection	3	159	0.999996	1	ko05330	ENSG00000204252;ENSG00000232810;ENSG00000234745	K06752+K03156+K06751
Human Diseases	Endocrine and metabolic diseases	Type I diabetes mellitus	3	168	0.999999	1	ko04940	ENSG00000204252;ENSG00000232810;ENSG00000234745	K06752+K03156+K06751
Human Diseases	Immune diseases	Graft-versus-host disease	3	179	1	1	ko05332	ENSG00000204252;ENSG00000232810;ENSG00000234745	K06752+K03156+K06751
Human Diseases	Cardiovascular diseases	Viral myocarditis	3	186	1	1	ko05416	ENSG00000169750;ENSG00000204252;ENSG00000234745	K07861+K06752+K06751
Human Diseases	Immune diseases	Autoimmune thyroid disease	2	167	1	1	ko05320	ENSG00000204252;ENSG00000234745	K06752+K06751

## Sheet: OGD-R vs. OGD
KEGG_A_class	KEGG_B_class	Pathway	OGD-vs-OGD_R (132)	All (8193)	Pvalue	Qvalue	Pathway ID	Genes	KOs
Environmental Information Processing	Signal transduction	TNF signaling pathway	19	142	8.0353e-13	1.42225e-10	ko04668	XLOC_011054;XLOC_026608;ENSG00000136244;ENSG00000163739;ENSG00000115009;ENSG00000034152;ENSG00000081041;ENSG00000171223;ENSG00000163734;ENSG00000100906;ENSG00000170345;ENSG00000078401;ENSG00000128342;ENSG00000177606;ENSG00000184557;ENSG00000073756;ENSG00000232810;ENSG00000164400;ENSG00000118503	K04466+K07210+K05405+K05505+K14625+K04432+K05505+K09028+K05505+K04734+K04379+K16366+K05419+K04448+K04696+K11987+K03156+K05427+K11859
Environmental Information Processing	Signal transduction	TGF-beta signaling pathway	12	99	5.19398e-08	4.59667e-06	ko04350	ENSG00000122641;ENSG00000134363;ENSG00000125968;ENSG00000136997;ENSG00000183691;ENSG00000137801;ENSG00000172201;ENSG00000156466;ENSG00000115738;ENSG00000232810;ENSG00000139269;ENSG00000117318	K04667+K04661+K04680+K04377+K04658+K16857+K17695+K04664+K17693+K03156+K04667+K17694
Environmental Information Processing	Signaling molecules and interaction	Cytokine-cytokine receptor interaction	19	334	1.45273e-06	8.57109e-05	ko04060	ENSG00000122641;ENSG00000169429;ENSG00000113721;ENSG00000160683;ENSG00000157404;ENSG00000162892;ENSG00000136244;ENSG00000095752;ENSG00000163739;ENSG00000181634;ENSG00000115009;ENSG00000081041;ENSG00000163734;ENSG00000156466;ENSG00000128342;ENSG00000232810;ENSG00000164400;ENSG00000139269;ENSG00000175505	K04667+K10030+K05089+K04190+K05091+K05444+K05405+K05417+K05505+K05478+K14625+K05505+K05505+K04664+K05419+K03156+K05427+K04667+K05421
Organismal Systems	Immune system	NOD-like receptor signaling pathway	9	76	3.18362e-06	0.000140875	ko04621	XLOC_026608;ENSG00000169429;ENSG00000136244;ENSG00000163739;ENSG00000081041;ENSG00000100906;ENSG00000232810;ENSG00000103490;ENSG00000118503	K07210+K10030+K05405+K05505+K05505+K04734+K03156+K12799+K11859
Human Diseases	Infectious diseases	Salmonella infection	10	107	7.81945e-06	0.000276808	ko05132	ENSG00000169429;ENSG00000136244;ENSG00000163739;ENSG00000187240;ENSG00000081041;ENSG00000163734;ENSG00000170345;ENSG00000177606;ENSG00000164400;ENSG00000103490	K10030+K05405+K05505+K10414+K05505+K05505+K04379+K04448+K05427+K12799
Human Diseases	Infectious diseases	Legionellosis	9	92	1.5623e-05	0.000460879	ko05134	ENSG00000173110;ENSG00000169429;ENSG00000136244;ENSG00000163739;ENSG00000081041;ENSG00000163734;ENSG00000100906;ENSG00000232810;ENSG00000103490	K03283+K10030+K05405+K05505+K05505+K05505+K04734+K03156+K12799
Environmental Information Processing	Signal transduction	Jak-STAT signaling pathway	12	185	4.04291e-05	0.00102228	ko04630	ENSG00000136158;ENSG00000185338;ENSG00000162892;ENSG00000136244;ENSG00000136997;ENSG00000095752;ENSG00000187678;ENSG00000164056;ENSG00000128342;ENSG00000184557;ENSG00000164400;ENSG00000175505	K17383+K04694+K05444+K05405+K04377+K05417+K17385+K04704+K05419+K04696+K05427+K05421
Cellular Processes	Cellular commiunity	Signaling pathways regulating pluripotency of stem cells	11	163	5.98649e-05	0.00132451	ko04550	ENSG00000122641;ENSG00000125968;ENSG00000136997;ENSG00000172201;ENSG00000135111;ENSG00000115738;ENSG00000115507;ENSG00000128342;ENSG00000139269;ENSG00000117318;ENSG00000204531	K04667+K04680+K04377+K17695+K10177+K17693+K09326+K05419+K04667+K17694+K09367
Environmental Information Processing	Signal transduction	MAPK signaling pathway	15	318	0.000172679	0.00339602	ko04010	XLOC_011054;XLOC_026608;ENSG00000173110;ENSG00000113721;ENSG00000176697;ENSG00000136997;ENSG00000138166;ENSG00000034152;ENSG00000120875;ENSG00000170345;ENSG00000120129;ENSG00000177606;ENSG00000232810;ENSG00000158050;ENSG00000123358	K04466+K07210+K03283+K05089+K04355+K04377+K04459+K04432+K04459+K04379+K04459+K04448+K03156+K04459+K04465
Organismal Systems	Development	Osteoclast differentiation	11	210	0.000553698	0.00980045	ko04380	XLOC_011054;XLOC_026608;ENSG00000185338;ENSG00000171223;ENSG00000100906;ENSG00000170345;ENSG00000175592;ENSG00000177606;ENSG00000125740;ENSG00000184557;ENSG00000232810	K04466+K07210+K04694+K09028+K04734+K04379+K04502+K04448+K09029+K04696+K03156
Human Diseases	Cancers	Viral carcinogenesis	19	522	0.00065782	0.010277	ko05203	ENSG00000179388;ENSG00000100906;ENSG00000177606;ENSG00000111276;ENSG00000122877;ENSG00000182217;ENSG00000182217;ENSG00000182217;ENSG00000182217;ENSG00000182217;ENSG00000182217;ENSG00000182217;ENSG00000182217;ENSG00000182217;ENSG00000182217;ENSG00000182217;ENSG00000182217;ENSG00000182217;ENSG00000182217	K12497+K04734+K04448+K06624+K12496+K11254+K11254+K11254+K11254+K11254+K11254+K11254+K11254+K11254+K11254+K11254+K11254+K11254+K11254
Human Diseases	Cancers	MicroRNAs in cancer	10	183	0.000715288	0.010277	ko05206	ENSG00000136158;ENSG00000113721;ENSG00000068028;ENSG00000185338;ENSG00000136997;ENSG00000074181;ENSG00000137801;ENSG00000168209;ENSG00000111276;ENSG00000073756	K17383+K05089+K09850+K04694+K04377+K02599+K16857+K08270+K06624+K11987
Human Diseases	Infectious diseases	Hepatitis B	10	185	0.000778201	0.010277	ko05161	ENSG00000169429;ENSG00000179388;ENSG00000136244;ENSG00000136997;ENSG00000100906;ENSG00000170345;ENSG00000177606;ENSG00000111276;ENSG00000232810;ENSG00000122877	K10030+K12497+K05405+K04377+K04734+K04379+K04448+K06624+K03156+K12496
Organismal Systems	Endocrine system	Adipocytokine signaling pathway	7	95	0.000818226	0.010277	ko04920	XLOC_026608;ENSG00000103740;ENSG00000100906;ENSG00000184557;ENSG00000232810;ENSG00000131791;ENSG00000169169	K07210+K15013+K04734+K04696+K03156+K07199+K19524
Environmental Information Processing	Signal transduction	ErbB signaling pathway	7	96	0.000870929	0.010277	ko04012	ENSG00000136997;ENSG00000113070;ENSG00000109321;ENSG00000177606;ENSG00000058404;ENSG00000111276;ENSG00000124882	K04377+K08523+K09782+K04448+K04515+K06624+K09784
Human Diseases	Cancers	Bladder cancer	5	49	0.00108684	0.0120232	ko05219	ENSG00000169429;ENSG00000068028;ENSG00000136997;ENSG00000137801;ENSG00000113070	K10030+K09850+K04377+K16857+K08523
Environmental Information Processing	Signal transduction	Hippo signaling pathway	9	170	0.00164891	0.017168	ko04390	ENSG00000068028;ENSG00000125968;ENSG00000136997;ENSG00000118523;ENSG00000106366;ENSG00000156466;ENSG00000115738;ENSG00000109321;ENSG00000019549	K09850+K04680+K04377+K06827+K03982+K04664+K17693+K09782+K05706
Organismal Systems	Immune system	Toll-like receptor signaling pathway	8	141	0.00193289	0.0190067	ko04620	XLOC_026608;ENSG00000169429;ENSG00000136244;ENSG00000034152;ENSG00000100906;ENSG00000170345;ENSG00000177606;ENSG00000232810	K07210+K10030+K05405+K04432+K04734+K04379+K04448+K03156
Environmental Information Processing	Signal transduction	NF-kappa B signaling pathway	8	144	0.00220688	0.0205588	ko04064	XLOC_011054;XLOC_026608;ENSG00000169429;ENSG00000081041;ENSG00000100906;ENSG00000073756;ENSG00000232810;ENSG00000118503	K04466+K07210+K10030+K05505+K04734+K11987+K03156+K11859
Environmental Information Processing	Signal transduction	FoxO signaling pathway	8	156	0.00362174	0.0316798	ko04068	ENSG00000127528;ENSG00000136244;ENSG00000173846;ENSG00000113916;ENSG00000145632;ENSG00000111276;ENSG00000131791;ENSG00000118515	K17845+K05405+K08862+K15618+K08861+K06624+K07199+K13302
Human Diseases	Immune diseases	Rheumatoid arthritis	9	192	0.00375862	0.0316798	ko05323	ENSG00000169429;ENSG00000136244;ENSG00000095752;ENSG00000163739;ENSG00000115009;ENSG00000170345;ENSG00000177606;ENSG00000232810;ENSG00000164400	K10030+K05405+K05417+K05505+K14625+K04379+K04448+K03156+K05427
Human Diseases	Infectious diseases	Pertussis	7	129	0.00471652	0.0379465	ko05133	ENSG00000169429;ENSG00000136244;ENSG00000224389;ENSG00000170345;ENSG00000177606;ENSG00000232810;ENSG00000103490	K10030+K05405+K03989+K04379+K04448+K03156+K12799
Organismal Systems	Immune system	T cell receptor signaling pathway	7	132	0.00534526	0.0411352	ko04660	XLOC_011054;XLOC_026608;ENSG00000100906;ENSG00000170345;ENSG00000177606;ENSG00000232810;ENSG00000164400	K04466+K07210+K04734+K04379+K04448+K03156+K05427
Human Diseases	Substance dependence	Amphetamine addiction	5	78	0.00830659	0.0612611	ko05031	ENSG00000131771;ENSG00000170345;ENSG00000177606;ENSG00000125740;ENSG00000058404	K15494+K04379+K04448+K09029+K04515
Human Diseases	Infectious diseases	Chagas disease (American trypanosomiasis)	7	145	0.00882049	0.062449	ko05142	ENSG00000169429;ENSG00000136244;ENSG00000106366;ENSG00000100906;ENSG00000170345;ENSG00000177606;ENSG00000232810	K10030+K05405+K03982+K04734+K04379+K04448+K03156
Human Diseases	Infectious diseases	Epithelial cell signaling in Helicobacter pylori infection	5	82	0.0102041	0.0694581	ko05120	ENSG00000169429;ENSG00000163739;ENSG00000113070;ENSG00000100906;ENSG00000177606	K10030+K05505+K08523+K04734+K04448
Human Diseases	Substance dependence	Cocaine addiction	4	54	0.0109337	0.0694581	ko05030	ENSG00000176697;ENSG00000131771;ENSG00000177606;ENSG00000125740	K04355+K15494+K04448+K09029
Human Diseases	Substance dependence	Alcoholism	17	577	0.0109877	0.0694581	ko05034	ENSG00000176697;ENSG00000131771;ENSG00000125740;ENSG00000182217;ENSG00000182217;ENSG00000182217;ENSG00000182217;ENSG00000182217;ENSG00000182217;ENSG00000182217;ENSG00000182217;ENSG00000182217;ENSG00000182217;ENSG00000182217;ENSG00000182217;ENSG00000182217;ENSG00000182217	K04355+K15494+K09029+K11254+K11254+K11254+K11254+K11254+K11254+K11254+K11254+K11254+K11254+K11254+K11254+K11254+K11254
Environmental Information Processing	Signal transduction	cAMP signaling pathway	9	234	0.0131356	0.0801724	ko04024	ENSG00000135312;ENSG00000176697;ENSG00000131771;ENSG00000169252;ENSG00000100906;ENSG00000170345;ENSG00000177606;ENSG00000125398;ENSG00000058404	K04153+K04355+K15494+K04142+K04734+K04379+K04448+K18435+K04515
Human Diseases	Infectious diseases	HTLV-I infection	13	412	0.015194	0.0896445	ko05166	ENSG00000113721;ENSG00000136244;ENSG00000136997;ENSG00000120738;ENSG00000128016;ENSG00000162772;ENSG00000100906;ENSG00000170345;ENSG00000175592;ENSG00000177606;ENSG00000232810;ENSG00000164400;ENSG00000122877	K05089+K05405+K04377+K09203+K15308+K09032+K04734+K04379+K04502+K04448+K03156+K05427+K12496
Human Diseases	Endocrine and metabolic diseases	Type II diabetes mellitus	4	62	0.017484	0.099828	ko04930	ENSG00000182759;ENSG00000185338;ENSG00000184557;ENSG00000232810	K07595+K04694+K04696+K03156
Human Diseases	Endocrine and metabolic diseases	Insulin resistance	6	131	0.0189618	0.10423	ko04931	ENSG00000136244;ENSG00000100906;ENSG00000184557;ENSG00000119938;ENSG00000232810;ENSG00000131791	K05405+K04734+K04696+K07189+K03156+K07199
Human Diseases	Infectious diseases	Malaria	4	64	0.0194328	0.10423	ko05144	ENSG00000169429;ENSG00000136244;ENSG00000137801;ENSG00000232810	K10030+K05405+K16857+K03156
Organismal Systems	Endocrine system	GnRH signaling pathway	5	103	0.0251057	0.130697	ko04912	ENSG00000034152;ENSG00000113070;ENSG00000147437;ENSG00000177606;ENSG00000058404	K04432+K08523+K05252+K04448+K04515
Organismal Systems	Immune system	Chemokine signaling pathway	8	223	0.0274063	0.138597	ko04062	XLOC_026608;ENSG00000169429;ENSG00000160683;ENSG00000163739;ENSG00000115009;ENSG00000081041;ENSG00000163734;ENSG00000100906	K07210+K10030+K04190+K05505+K14625+K05505+K05505+K04734
Organismal Systems	Immune system	Cytosolic DNA-sensing pathway	4	76	0.0339024	0.156329	ko04623	XLOC_026608;ENSG00000136244;ENSG00000100906;ENSG00000103490	K07210+K05405+K04734+K12799
Cellular Processes	Cell growth and death	Apoptosis	5	112	0.03436	0.156329	ko04210	XLOC_011054;XLOC_026608;ENSG00000100906;ENSG00000232810;ENSG00000134070	K04466+K07210+K04734+K03156+K04731
Human Diseases	Endocrine and metabolic diseases	Non-alcoholic fatty liver disease (NAFLD)	7	191	0.0344408	0.156329	ko04932	ENSG00000169429;ENSG00000136244;ENSG00000255339;ENSG00000177606;ENSG00000184557;ENSG00000232810;ENSG00000131791	K10030+K05405+K03964+K04448+K04696+K03156+K07199
Human Diseases	Cancers	Pathways in cancer	13	462	0.0348321	0.156329	ko05200	ENSG00000169429;ENSG00000113721;ENSG00000068028;ENSG00000157404;ENSG00000136244;ENSG00000136997;ENSG00000139618;ENSG00000100906;ENSG00000170345;ENSG00000171522;ENSG00000177606;ENSG00000111276;ENSG00000073756	K10030+K05089+K09850+K05091+K05405+K04377+K08775+K04734+K04379+K04261+K04448+K06624+K11987
Genetic Information Processing	Replication and repair	Fanconi anemia pathway	4	77	0.0353286	0.156329	ko03460	XLOC_007436;XLOC_021248;ENSG00000139618;ENSG00000114315	K10858+K04482+K08775+K06054
Environmental Information Processing	Signal transduction	HIF-1 signaling pathway	5	116	0.0390715	0.168675	ko04066	ENSG00000136244;ENSG00000106366;ENSG00000078401;ENSG00000058404;ENSG00000111276	K05405+K03982+K16366+K04515+K06624
Human Diseases	Immune diseases	Systemic lupus erythematosus	16	636	0.0490564	0.206738	ko05322	ENSG00000224389;ENSG00000232810;ENSG00000182217;ENSG00000182217;ENSG00000182217;ENSG00000182217;ENSG00000182217;ENSG00000182217;ENSG00000182217;ENSG00000182217;ENSG00000182217;ENSG00000182217;ENSG00000182217;ENSG00000182217;ENSG00000182217;ENSG00000182217	K03989+K03156+K11254+K11254+K11254+K11254+K11254+K11254+K11254+K11254+K11254+K11254+K11254+K11254+K11254+K11254
Organismal Systems	Immune system	Fc epsilon RI signaling pathway	4	87	0.0514874	0.211936	ko04664	ENSG00000158869;ENSG00000034152;ENSG00000232810;ENSG00000164400	K07983+K04432+K03156+K05427
Organismal Systems	Immune system	Hematopoietic cell lineage	5	128	0.0554819	0.223189	ko04640	ENSG00000157404;ENSG00000136244;ENSG00000095752;ENSG00000232810;ENSG00000164400	K05091+K05405+K05417+K03156+K05427
Organismal Systems	Immune system	RIG-I-like receptor signaling pathway	4	90	0.0570055	0.224222	ko04622	XLOC_026608;ENSG00000169429;ENSG00000100906;ENSG00000232810	K07210+K10030+K04734+K03156
Human Diseases	Infectious diseases	Influenza A	9	318	0.0708401	0.262614	ko05164	ENSG00000173110;ENSG00000169429;ENSG00000136244;ENSG00000034152;ENSG00000100906;ENSG00000177606;ENSG00000184557;ENSG00000232810;ENSG00000103490	K03283+K10030+K05405+K04432+K04734+K04448+K04696+K03156+K12799
Organismal Systems	Immune system	B cell receptor signaling pathway	4	97	0.0710641	0.262614	ko04662	XLOC_026608;ENSG00000100906;ENSG00000170345;ENSG00000177606	K07210+K04734+K04379+K04448
Human Diseases	Infectious diseases	Amoebiasis	5	139	0.0735509	0.262614	ko05146	ENSG00000169429;ENSG00000136244;ENSG00000163739;ENSG00000232810;ENSG00000164400	K10030+K05405+K05505+K03156+K05427
Human Diseases	Cancers	Transcriptional misregulation in cancers	9	321	0.0741752	0.262614	ko05202	ENSG00000169429;ENSG00000136244;ENSG00000136997;ENSG00000115738;ENSG00000113916;ENSG00000111276;ENSG00000144802;ENSG00000164400;ENSG00000119508	K10030+K05405+K04377+K17693+K15618+K06624+K14242+K05427+K08559
Human Diseases	Endocrine and metabolic diseases	Maturity onset diabetes of the young	2	28	0.0741846	0.262614	ko04950	ENSG00000182759;ENSG00000114315	K07595+K06054
Organismal Systems	Endocrine system	Oxytocin signaling pathway	6	184	0.0764735	0.265408	ko04921	ENSG00000170345;ENSG00000159200;ENSG00000177606;ENSG00000058404;ENSG00000073756;ENSG00000131791	K04379+K17901+K04448+K04515+K11987+K07199
Organismal Systems	Nervous system	Neurotrophin signaling pathway	5	142	0.0789772	0.268826	ko04722	ENSG00000176697;ENSG00000100906;ENSG00000177606;ENSG00000058404;ENSG00000134070	K04355+K04734+K04448+K04515+K04731
Environmental Information Processing	Signal transduction	Wnt signaling pathway	5	151	0.0965073	0.322298	ko04310	ENSG00000136997;ENSG00000175592;ENSG00000177606;ENSG00000058404;ENSG00000107984	K04377+K04502+K04448+K04515+K02165
Human Diseases	Cancers	Small cell lung cancer	4	110	0.101385	0.332319	ko05222	ENSG00000136997;ENSG00000100906;ENSG00000111276;ENSG00000073756	K04377+K04734+K06624+K11987
Genetic Information Processing	Replication and repair	Homologous recombination	2	35	0.108698	0.349808	ko03440	XLOC_021248;ENSG00000139618	K04482+K08775
Human Diseases	Cancers	Colorectal cancer	3	73	0.113134	0.357586	ko05210	ENSG00000136997;ENSG00000170345;ENSG00000177606	K04377+K04379+K04448
Human Diseases	Cardiovascular diseases	Hypertrophic cardiomyopathy (HCM)	4	117	0.119822	0.372078	ko05410	ENSG00000136244;ENSG00000078401;ENSG00000232810;ENSG00000131791	K05405+K16366+K03156+K07199
Environmental Information Processing	Signal transduction	PI3K-Akt signaling pathway	10	411	0.126004	0.384531	ko04151	XLOC_026608;ENSG00000113721;ENSG00000157404;ENSG00000136244;ENSG00000136997;ENSG00000137801;ENSG00000168209;ENSG00000111276;ENSG00000123358;ENSG00000118515	K07210+K05089+K05091+K05405+K04377+K16857+K08270+K06624+K04465+K13302
Human Diseases	Infectious diseases	Hepatitis C	5	166	0.1297	0.389099	ko05160	ENSG00000169429;ENSG00000100906;ENSG00000171217;ENSG00000184557;ENSG00000232810	K10030+K04734+K06087+K04696+K03156
Organismal Systems	Endocrine system	Renin secretion	3	79	0.134496	0.394163	ko04924	XLOC_001628;ENSG00000169252;ENSG00000171522	K01380+K04142+K04261
Human Diseases	Cancers	Central carbon metabolism in cancer	3	80	0.138185	0.394163	ko05230	ENSG00000113721;ENSG00000157404;ENSG00000136997	K05089+K05091+K04377
Human Diseases	Infectious diseases	Leishmaniasis	5	171	0.141793	0.394163	ko05140	ENSG00000100906;ENSG00000170345;ENSG00000177606;ENSG00000073756;ENSG00000232810	K04734+K04379+K04448+K11987+K03156
Organismal Systems	Endocrine system	Prolactin signaling pathway	3	81	0.141908	0.394163	ko04917	ENSG00000185338;ENSG00000170345;ENSG00000184557	K04694+K04379+K04696
Organismal Systems	Nervous system	Serotonergic synapse	4	125	0.142522	0.394163	ko04726	ENSG00000135312;ENSG00000100197;ENSG00000120129;ENSG00000073756	K04153+K17712+K04459+K11987
Metabolism	Lipid metabolism	Synthesis and degradation of ketone bodies	1	11	0.163708	0.439983	ko00072	ENSG00000198754	K01027
Human Diseases	Cancers	Chronic myeloid leukemia	3	87	0.164922	0.439983	ko05220	ENSG00000136997;ENSG00000100906;ENSG00000111276	K04377+K04734+K06624
Environmental Information Processing	Signaling molecules and interaction	Neuroactive ligand-receptor interaction	8	332	0.166547	0.439983	ko04080	ENSG00000135312;ENSG00000176136;ENSG00000181408;ENSG00000169252;ENSG00000272658;ENSG00000171522;ENSG00000127129;ENSG00000129749	K04153+K04203+K04241+K04142+K04297+K04261+K16367+K04811
Metabolism	Lipid metabolism	Fatty acid degradation	2	47	0.174943	0.455366	ko00071	ENSG00000103740;ENSG00000169169	K15013+K19524
Metabolism	Lipid metabolism	Fatty acid biosynthesis	1	13	0.190476	0.479631	ko00061	ENSG00000103740	K15013
Human Diseases	Infectious diseases	Measles	5	190	0.191854	0.479631	ko05162	ENSG00000173110;ENSG00000136244;ENSG00000100906;ENSG00000111276;ENSG00000118503	K03283+K05405+K04734+K06624+K11859
Human Diseases	Infectious diseases	African trypanosomiasis	2	50	0.192394	0.479631	ko05143	ENSG00000136244;ENSG00000232810	K05405+K03156
Organismal Systems	Endocrine system	Estrogen signaling pathway	4	143	0.198996	0.4892	ko04915	ENSG00000173110;ENSG00000113070;ENSG00000170345;ENSG00000177606	K03283+K08523+K04379+K04448
Human Diseases	Cancers	Prostate cancer	3	99	0.213826	0.518455	ko05215	ENSG00000113721;ENSG00000100906;ENSG00000111276	K05089+K04734+K06624
Organismal Systems	Endocrine system	Aldosterone synthesis and secretion	3	100	0.21804	0.521527	ko04925	ENSG00000153234;ENSG00000058404;ENSG00000123358	K08558+K04515+K04465
Human Diseases	Neurodegenerative diseases	Prion diseases	2	55	0.221933	0.523761	ko05020	ENSG00000136244;ENSG00000120738	K05405+K09203
Environmental Information Processing	Signal transduction	Calcium signaling pathway	5	202	0.22631	0.527063	ko04020	ENSG00000113721;ENSG00000118160;ENSG00000169252;ENSG00000272658;ENSG00000058404	K05089+K05849+K04142+K04297+K04515
Environmental Information Processing	Signal transduction	Notch signaling pathway	2	57	0.233856	0.530673	ko04330	ENSG00000074181;ENSG00000114315	K02599+K06054
Metabolism	Global and Overview	Fatty acid metabolism	2	57	0.233856	0.530673	ko01212	ENSG00000103740;ENSG00000169169	K15013+K19524
Organismal Systems	Environmental adaptation	Circadian entrainment	3	110	0.261007	0.562636	ko04713	ENSG00000108551;ENSG00000170345;ENSG00000058404	K07843+K04379+K04515
Organismal Systems	Endocrine system	Regulation of lipolysis in adipocyte	2	62	0.2638	0.562636	ko04923	ENSG00000169252;ENSG00000073756	K04142+K11987
Organismal Systems	Endocrine system	Melanogenesis	3	111	0.265371	0.562636	ko04916	ENSG00000157404;ENSG00000078401;ENSG00000058404	K05091+K16366+K04515
Metabolism	Metabolism of other amino acids	Selenocompound metabolism	1	19	0.265782	0.562636	ko00450	ENSG00000247626	K01874
Metabolism	Global and Overview	2-Oxocarboxylic acid metabolism	1	19	0.265782	0.562636	ko01210	ENSG00000161653	K11067
Human Diseases	Neurodegenerative diseases	Amyotrophic lateral sclerosis (ALS)	2	63	0.269798	0.562636	ko05014	ENSG00000034152;ENSG00000232810	K04432+K03156
Genetic Information Processing	Folding, sorting and degradation	Ubiquitin mediated proteolysis	4	165	0.275319	0.562636	ko04120	XLOC_008218;XLOC_008523;ENSG00000185338;ENSG00000184557	K10595+K10595+K04694+K04696
Organismal Systems	Endocrine system	Glucagon signaling pathway	3	114	0.278512	0.562636	ko04922	ENSG00000058404;ENSG00000131791;ENSG00000169169	K04515+K07199+K19524
Organismal Systems	Endocrine system	Insulin signaling pathway	4	166	0.278914	0.562636	ko04910	ENSG00000185338;ENSG00000184557;ENSG00000119938;ENSG00000131791	K04694+K04696+K07189+K07199
Human Diseases	Cancers	Choline metabolism in cancer	3	115	0.282908	0.562636	ko05231	ENSG00000113721;ENSG00000170345;ENSG00000177606	K05089+K04379+K04448
Organismal Systems	Sensory system	Inflammatory mediator regulation of TRP channels	3	115	0.282908	0.562636	ko04750	ENSG00000034152;ENSG00000171522;ENSG00000058404	K04432+K04261+K04515
Human Diseases	Infectious diseases	Epstein-Barr virus infection	7	339	0.305381	0.598097	ko05169	ENSG00000173110;ENSG00000136997;ENSG00000034152;ENSG00000100906;ENSG00000177606;ENSG00000111276;ENSG00000118503	K03283+K04377+K04432+K04734+K04448+K06624+K11859
Metabolism	Amino acid metabolism	Arginine biosynthesis	1	23	0.312081	0.598097	ko00220	ENSG00000161653	K11067
Organismal Systems	Immune system	Complement and coagulation cascades	3	122	0.313817	0.598097	ko04610	ENSG00000205403;ENSG00000106366;ENSG00000224389	K01333+K03982+K03989
Environmental Information Processing	Signal transduction	mTOR signaling pathway	2	71	0.317634	0.598097	ko04150	ENSG00000168209;ENSG00000232810	K08270+K03156
Human Diseases	Cancers	Acute myeloid leukemia	2	71	0.317634	0.598097	ko05221	ENSG00000157404;ENSG00000136997	K05091+K04377
Environmental Information Processing	Signal transduction	Rap1 signaling pathway	5	236	0.331649	0.609705	ko04015	ENSG00000113721;ENSG00000157404;ENSG00000125968;ENSG00000034152;ENSG00000137801	K05089+K05091+K04680+K04432+K16857
Human Diseases	Cancers	Proteoglycans in cancer	5	236	0.331649	0.609705	ko05205	ENSG00000136997;ENSG00000137801;ENSG00000113070;ENSG00000058404;ENSG00000232810	K04377+K16857+K08523+K04515+K03156
Organismal Systems	Endocrine system	Renin-angiotensin system	1	25	0.334132	0.609705	ko04614	XLOC_001628	K01380
Human Diseases	Infectious diseases	Tuberculosis	6	296	0.342411	0.618437	ko05152	ENSG00000136244;ENSG00000158869;ENSG00000173846;ENSG00000058404;ENSG00000232810;ENSG00000134070	K05405+K07983+K08862+K04515+K03156+K04731
Human Diseases	Infectious diseases	Shigellosis	2	76	0.347198	0.620748	ko05131	ENSG00000169429;ENSG00000100906	K10030+K04734
Cellular Processes	Cell growth and death	p53 signaling pathway	2	78	0.358912	0.628984	ko04115	ENSG00000137801;ENSG00000106366	K16857+K03982
Organismal Systems	Endocrine system	PPAR signaling pathway	2	78	0.358912	0.628984	ko03320	ENSG00000103740;ENSG00000169169	K15013+K19524
Human Diseases	Infectious diseases	Toxoplasmosis	5	247	0.366994	0.636842	ko05145	ENSG00000173110;ENSG00000185338;ENSG00000034152;ENSG00000100906;ENSG00000232810	K03283+K04694+K04432+K04734+K03156
Metabolism	Carbohydrate metabolism	Butanoate metabolism	1	29	0.376151	0.646395	ko00650	ENSG00000198754	K01027
Human Diseases	Cancers	Glioma	2	82	0.382105	0.650314	ko05214	ENSG00000113721;ENSG00000058404	K05089+K04515
Organismal Systems	Development	Axon guidance	3	140	0.393252	0.661516	ko04360	ENSG00000172602;ENSG00000138835;ENSG00000138623	K07531+K07524+K06529
Organismal Systems	Environmental adaptation	Circadian rhythm	1	31	0.396162	0.661516	ko04710	ENSG00000131791	K07199
Genetic Information Processing	Replication and repair	Mismatch repair	1	33	0.415537	0.683849	ko03430	XLOC_007436	K10858
Organismal Systems	Endocrine system	Thyroid hormone signaling pathway	3	147	0.42363	0.683849	ko04919	ENSG00000136997;ENSG00000074181;ENSG00000159200	K04377+K02599+K17901
Organismal Systems	Nervous system	Dopaminergic synapse	3	147	0.42363	0.683849	ko04728	ENSG00000131771;ENSG00000170345;ENSG00000058404	K15494+K04379+K04515
Organismal Systems	Development	Dorso-ventral axis formation	1	34	0.424991	0.683849	ko04320	ENSG00000074181	K02599
Human Diseases	Immune diseases	Inflammatiory bowel disease (IBD)	3	155	0.457706	0.729856	ko05321	ENSG00000136244;ENSG00000177606;ENSG00000232810	K05405+K04448+K03156
Human Diseases	Cancers	Thyroid cancer	1	40	0.478614	0.756381	ko05216	ENSG00000136997	K04377
Organismal Systems	Excretory system	Aldosterone-regulated sodium reabsorption	1	43	0.503533	0.788721	ko04960	ENSG00000118515	K13302
Human Diseases	Immune diseases	Asthma	2	110	0.532296	0.82646	ko05310	ENSG00000158869;ENSG00000232810	K07983+K03156
Human Diseases	Infectious diseases	Herpes simplex infection	6	365	0.539391	0.827728	ko05168	ENSG00000136244;ENSG00000100906;ENSG00000170345;ENSG00000177606;ENSG00000184557;ENSG00000232810	K05405+K04734+K04379+K04448+K04696+K03156
Organismal Systems	Excretory system	Vasopressin-regulated water reabsorption	1	48	0.542466	0.827728	ko04962	ENSG00000187240	K10414
Metabolism	Amino acid metabolism	Valine, leucine and isoleucine degradation	1	55	0.591931	0.87345	ko00280	ENSG00000198754	K01027
Organismal Systems	Nervous system	Cholinergic synapse	2	123	0.593205	0.87345	ko04725	ENSG00000170345;ENSG00000058404	K04379+K04515
Cellular Processes	Cell growth and death	Oocyte meiosis	2	124	0.59764	0.87345	ko04114	ENSG00000163806;ENSG00000058404	K08694+K04515
Organismal Systems	Endocrine system	Ovarian Steroidogenesis	1	56	0.59855	0.87345	ko04913	ENSG00000073756	K11987
Genetic Information Processing	Translation	mRNA surveillance pathway	2	125	0.602039	0.87345	ko03015	XLOC_009666;ENSG00000125351	K08873+K14328
Organismal Systems	Immune system	Intestinal immune network for IgA production	2	125	0.602039	0.87345	ko04672	XLOC_011054;ENSG00000136244	K04466+K05405
Environmental Information Processing	Signal transduction	Ras signaling pathway	4	262	0.613967	0.883513	ko04014	XLOC_026608;ENSG00000113721;ENSG00000068028;ENSG00000157404	K07210+K05089+K09850+K05091
Genetic Information Processing	Translation	Aminoacyl-tRNA biosynthesis	1	60	0.623977	0.890677	ko00970	ENSG00000247626	K01874
Organismal Systems	Digestive system	Carbohydrate digestion and absorption	1	62	0.636085	0.894746	ko04973	ENSG00000169962	K04626
Environmental Information Processing	Signal transduction	AMPK signaling pathway	2	134	0.640013	0.894746	ko04152	ENSG00000131791;ENSG00000169169	K07199+K19524
Human Diseases	Cancers	Endometrial cancer	1	63	0.641993	0.894746	ko05213	ENSG00000136997	K04377
Cellular Processes	Cell growth and death	Cell cycle	2	138	0.655963	0.904417	ko04110	ENSG00000136997;ENSG00000111276	K04377+K06624
Metabolism	Lipid metabolism	Arachidonic acid metabolism	1	66	0.659151	0.904417	ko00590	ENSG00000073756	K11987
Environmental Information Processing	Signal transduction	Sphingolipid signaling pathway	2	142	0.671349	0.914067	ko04071	ENSG00000158869;ENSG00000232810	K07983+K03156
Environmental Information Processing	Signal transduction	VEGF signaling pathway	1	70	0.680766	0.919813	ko04370	ENSG00000073756	K11987
Human Diseases	Cancers	Renal cell carcinoma	1	74	0.70102	0.93045	ko05211	ENSG00000177606	K04448
Organismal Systems	Circulatory system	Vascular smooth muscle contraction	2	151	0.703945	0.93045	ko04270	ENSG00000078401;ENSG00000127129	K16366+K16367
Organismal Systems	Nervous system	Long-term potentiation	1	75	0.70588	0.93045	ko04720	ENSG00000058404	K04515
Human Diseases	Cancers	Non-small cell lung cancer	1	77	0.715368	0.93045	ko05223	ENSG00000068028	K09850
Human Diseases	Cancers	Pancreatic cancer	1	81	0.733442	0.93045	ko05212	ENSG00000139618	K08775
Human Diseases	Cancers	Melanoma	1	81	0.733442	0.93045	ko05218	ENSG00000113721	K05089
Organismal Systems	Sensory system	Taste transduction	1	82	0.737779	0.93045	ko04742	ENSG00000169962	K04626
Metabolism	Xenobiotics biodegradation and metabolism	Drug metabolism - cytochrome P450	1	83	0.742047	0.93045	ko00982	ENSG00000100197	K17712
Metabolism	Global and Overview	Biosynthesis of amino acids	1	85	0.750376	0.93045	ko01230	ENSG00000161653	K11067
Organismal Systems	Immune system	Platelet activation	2	169	0.761135	0.93045	ko04611	ENSG00000158869;ENSG00000149781	K07983+K17084
Cellular Processes	Cellular commiunity	Adherens junction	1	91	0.773795	0.93045	ko04520	ENSG00000019549	K05706
Organismal Systems	Digestive system	Gastric acid secretion	1	91	0.773795	0.93045	ko04971	ENSG00000058404	K04515
Metabolism	Xenobiotics biodegradation and metabolism	Metabolism of xenobiotics by cytochrome P450	1	92	0.777481	0.93045	ko00980	ENSG00000100197	K17712
Cellular Processes	Cellular commiunity	Focal adhesion	3	252	0.777481	0.93045	ko04510	ENSG00000113721;ENSG00000137801;ENSG00000177606	K05089+K16857+K04448
Human Diseases	Infectious diseases	Staphylococcus aureus infection	2	176	0.780678	0.93045	ko05150	ENSG00000205403;ENSG00000224389	K01333+K03989
Organismal Systems	Endocrine system	Insulin secretion	1	93	0.781106	0.93045	ko04911	ENSG00000058404	K04515
Human Diseases	Immune diseases	Graft-versus-host disease	2	179	0.78862	0.93045	ko05332	ENSG00000136244;ENSG00000232810	K05405+K03156
Human Diseases	Cancers	Chemical carcinogenesis	1	96	0.791636	0.93045	ko05204	ENSG00000073756	K11987
Organismal Systems	Endocrine system	Progesterone-mediated oocyte maturation	1	96	0.791636	0.93045	ko04914	ENSG00000163806	K08694
Organismal Systems	Circulatory system	Adrenergic signaling in cardiomyocytes	2	181	0.793774	0.93045	ko04261	ENSG00000169252;ENSG00000058404	K04142+K04515
Environmental Information Processing	Signaling molecules and interaction	Cell adhesion molecules (CAMs)	3	270	0.815928	0.931811	ko04514	ENSG00000134258;ENSG00000120217;ENSG00000171217	K06747+K06745+K06087
Organismal Systems	Immune system	Natural killer cell mediated cytotoxicity	3	271	0.81789	0.931811	ko04650	ENSG00000158869;ENSG00000232810;ENSG00000164400	K07983+K03156+K05427
Organismal Systems	Nervous system	Retrograde endocannabinoid signaling	1	107	0.826119	0.931811	ko04723	ENSG00000073756	K11987
Cellular Processes	Cellular commiunity	Gap junction	1	107	0.826119	0.931811	ko04540	ENSG00000113721	K05089
Environmental Information Processing	Signal transduction	cGMP - PKG signaling pathway	2	195	0.826859	0.931811	ko04022	ENSG00000118160;ENSG00000169252	K05849+K04142
Organismal Systems	Digestive system	Salivary secretion	1	111	0.8372	0.931811	ko04970	ENSG00000169252	K04142
Genetic Information Processing	Folding, sorting and degradation	RNA degradation	1	111	0.8372	0.931811	ko03018	ENSG00000159388	K14443
Cellular Processes	Transport and catabolism	Endocytosis	4	363	0.843095	0.931811	ko04144	ENSG00000173110;ENSG00000157404;ENSG00000169252;ENSG00000072818	K03283+K05091+K04142+K12489
Genetic Information Processing	Folding, sorting and degradation	Protein processing in endoplasmic reticulum	2	205	0.84751	0.931811	ko04141	ENSG00000173110;ENSG00000180667	K03283+K13719
Organismal Systems	Digestive system	Protein digestion and absorption	1	115	0.84758	0.931811	ko04974	ENSG00000118160	K05849
Human Diseases	Neurodegenerative diseases	Alzheimer's disease	2	211	0.858808	0.935962	ko05010	ENSG00000255339;ENSG00000232810	K03964+K03156
Human Diseases	Cardiovascular diseases	Dilated cardiomyopathy (DCM)	1	121	0.861931	0.935962	ko05414	ENSG00000232810	K03156
Environmental Information Processing	Signaling molecules and interaction	ECM-receptor interaction	1	125	0.870745	0.939767	ko04512	ENSG00000137801	K16857
Human Diseases	Neurodegenerative diseases	Huntington's disease	2	224	0.880726	0.944778	ko05016	ENSG00000176697;ENSG00000255339	K04355+K03964
Organismal Systems	Immune system	Leukocyte transendothelial migration	1	145	0.907105	0.967214	ko04670	ENSG00000171217	K06087
Human Diseases	Immune diseases	Allograft rejection	1	159	0.926318	0.971533	ko05330	ENSG00000232810	K03156
Cellular Processes	Cellular commiunity	Tight junction	1	165	0.933292	0.971533	ko04530	ENSG00000171217	K06087
Human Diseases	Neurodegenerative diseases	Parkinson's disease	1	165	0.933292	0.971533	ko05012	ENSG00000255339	K03964
Human Diseases	Endocrine and metabolic diseases	Type I diabetes mellitus	1	168	0.936529	0.971533	ko04940	ENSG00000232810	K03156
Metabolism	Energy metabolism	Oxidative phosphorylation	1	170	0.9386	0.971533	ko00190	ENSG00000255339	K03964
Organismal Systems	Immune system	Antigen processing and presentation	2	282	0.94532	0.9728	ko04612	ENSG00000173110;ENSG00000232810	K03283+K03156
Genetic Information Processing	Transcription	Spliceosome	1	193	0.958098	0.980251	ko03040	ENSG00000173110	K03283
Genetic Information Processing	Translation	RNA transport	1	210	0.96843	0.98401	ko03013	ENSG00000125351	K14328
Cellular Processes	Transport and catabolism	Phagosome	2	332	0.972891	0.98401	ko04145	ENSG00000187240;ENSG00000137801	K10414+K16857
Cellular Processes	Cell motility	Regulation of actin cytoskeleton	1	241	0.981191	0.986766	ko04810	ENSG00000113721	K05089
Organismal Systems	Sensory system	Olfactory transduction	2	507	0.997999	0.997999	ko04740	ENSG00000172640;ENSG00000058404	K04257+K04515

## Sheet: OGD-R vs. NC
KEGG_A_class	KEGG_B_class	Pathway	NC-vs-OGD_R (662)	All (8193)	Pvalue	Qvalue	Pathway ID	Genes	KOs
Human Diseases	Substance dependence	Alcoholism	154	577	4.79477e-45	1.285e-42	ko05034	ENSG00000184825;ENSG00000128271;ENSG00000174775;ENSG00000167083;ENSG00000203812;ENSG00000203812;ENSG00000197061;ENSG00000197061;ENSG00000197061;ENSG00000197061;ENSG00000197061;ENSG00000197061;ENSG00000197061;ENSG00000197061;ENSG00000197061;ENSG00000197061;ENSG00000197061;ENSG00000197061;ENSG00000197061;ENSG00000197061;ENSG00000124529;ENSG00000124529;ENSG00000124529;ENSG00000124529;ENSG00000124529…	K11251+K04266+K02833+K04549+K11251+K11251+K11254+K11254+K11254+K11254+K11254+K11254+K11254+K11254+K11254+K11254+K11254+K11254+K11254+K11254+K11254+K11254+K11254+K11254+K11254+K11254+K11254+K11254+K11254+K11254+K11254+K11254+K11254+K11254+K11251+K11251+K11252+K11251+K11251+K11251+K11251+K11251+K11251+K11253+K11253+K11253+K11253+K11253+K11253+K11253+K11253+K11253+K11253+K11251+K11251+K11251+K11251+…
Genetic Information Processing	Translation	Ribosome	81	173	1.65164e-43	2.21319e-41	ko03010	ENSG00000214026;ENSG00000143314;ENSG00000239789;ENSG00000262814;ENSG00000163584;ENSG00000140988;ENSG00000130255;ENSG00000182899;ENSG00000181991;ENSG00000144713;ENSG00000165502;ENSG00000198242;ENSG00000197728;ENSG00000197728;ENSG00000130312;ENSG00000116898;ENSG00000114391;ENSG00000105193;ENSG00000109475;ENSG00000147604;ENSG00000142676;ENSG00000170889;ENSG00000131469;ENSG00000145425;ENSG00000164587…	K02892+K02895+K02961+K02935+K02891+K02981+K02920+K02917+K02948+K02912+K02929+K02893+K02976+K02976+K02914+K02956+K02896+K02960+K02915+K02937+K02868+K02997+K02901+K02984+K02955+K02970+K02889+K02921+K02872+K02910+K02990+K02983+K02951+K02880+K02926+K02902+K02927+K02940+K02980+K02971+K02979+K02947+K02942+K02975+K02989+K02905+K02888+K02977+K02985+K02943+K02885+K02874+K02957+K02924+K02923+K02949+K02887+…
Human Diseases	Immune diseases	Systemic lupus erythematosus	152	636	5.19064e-38	4.63697e-36	ko05322	ENSG00000184825;ENSG00000125835;ENSG00000203812;ENSG00000203812;ENSG00000197061;ENSG00000197061;ENSG00000197061;ENSG00000197061;ENSG00000197061;ENSG00000197061;ENSG00000197061;ENSG00000197061;ENSG00000197061;ENSG00000197061;ENSG00000197061;ENSG00000197061;ENSG00000197061;ENSG00000197061;ENSG00000124529;ENSG00000124529;ENSG00000124529;ENSG00000124529;ENSG00000124529;ENSG00000124529;ENSG00000124529…	K11251+K11086+K11251+K11251+K11254+K11254+K11254+K11254+K11254+K11254+K11254+K11254+K11254+K11254+K11254+K11254+K11254+K11254+K11254+K11254+K11254+K11254+K11254+K11254+K11254+K11254+K11254+K11254+K11254+K11254+K11254+K11254+K11251+K11251+K11252+K11251+K11251+K11251+K11251+K11251+K11251+K11253+K11253+K11253+K11253+K11253+K11253+K11253+K11253+K11253+K11253+K11251+K11251+K11251+K11251+K11253+K11253+…
Human Diseases	Cancers	Transcriptional misregulation in cancers	88	321	3.61395e-26	2.42135e-24	ko05202	ENSG00000056558;ENSG00000169429;ENSG00000136244;ENSG00000175197;ENSG00000136997;ENSG00000146674;ENSG00000256018;ENSG00000256018;ENSG00000256018;ENSG00000256018;ENSG00000256018;ENSG00000256018;ENSG00000256018;ENSG00000256018;ENSG00000256018;ENSG00000256018;ENSG00000170458;ENSG00000197409;ENSG00000197409;ENSG00000197409;ENSG00000197409;ENSG00000197409;ENSG00000197409;ENSG00000197409;ENSG00000197409…	K03172+K10030+K05405+K04452+K04377+K10138+K11253+K11253+K11253+K11253+K11253+K11253+K11253+K11253+K11253+K11253+K04391+K11253+K11253+K11253+K11253+K11253+K11253+K11253+K11253+K11253+K11253+K11253+K11253+K11253+K11253+K11253+K11253+K11253+K11253+K11253+K11253+K11253+K09438+K15627+K17693+K11253+K11253+K11253+K11253+K11253+K11253+K11253+K11253+K11253+K11253+K11253+K11253+K11253+K11253+K11253+K11253+…
Metabolism	Energy metabolism	Oxidative phosphorylation	58	170	1.22429e-22	6.56218e-21	ko00190	ENSG00000164919;ENSG00000169020;ENSG00000125356;ENSG00000167283;ENSG00000127184;ENSG00000164258;ENSG00000138495;ENSG00000099624;ENSG00000135940;ENSG00000131143;ENSG00000119421;ENSG00000189043;ENSG00000151366;ENSG00000151366;ENSG00000090266;ENSG00000159199;ENSG00000164405;ENSG00000099795;ENSG00000176340;ENSG00000126267;ENSG00000166136;ENSG00000183648;ENSG00000109390;ENSG00000170516;ENSG00000004779…	K02268+K02129+K03945+K02140+K02272+K03937+K02260+K02134+K02265+K02263+K03952+K03948+K03968+K03968+K03958+K02128+K00418+K03963+K02273+K02267+K03964+K03957+K03967+K02271+K03955+K03942+K02264+K11352+K03940+K03965+K03962+K03936+K03941+K03946+K03950+K00419+K02271+K03938+K00416+K00416+K03661+K11353+K03951+K11351+K00420+K02138+K03959+K02135+K03939+K02130+K03947+K03956+K02131+K02270+K02153+K02137+K02266+…
Human Diseases	Neurodegenerative diseases	Huntington's disease	66	224	1.26875e-21	5.6671e-20	ko05016	ENSG00000164919;ENSG00000105258;ENSG00000125356;ENSG00000127184;ENSG00000164258;ENSG00000099624;ENSG00000135940;ENSG00000131143;ENSG00000119421;ENSG00000189043;ENSG00000151366;ENSG00000151366;ENSG00000090266;ENSG00000159199;ENSG00000164405;ENSG00000042753;ENSG00000099795;ENSG00000176340;ENSG00000126267;ENSG00000166136;ENSG00000183648;ENSG00000142168;ENSG00000109390;ENSG00000170516;ENSG00000004779…	K02268+K03017+K03945+K02272+K03937+K02134+K02265+K02263+K03952+K03948+K03968+K03968+K03958+K02128+K00418+K11827+K03963+K02273+K02267+K03964+K03957+K04565+K03967+K02271+K03955+K03942+K02264+K11352+K03013+K00432+K03940+K03965+K03962+K03936+K03014+K03941+K03946+K03950+K03008+K00419+K02271+K03938+K10408+K00416+K00416+K11353+K03951+K02159+K11351+K00420+K02138+K03959+K02135+K03939+K10132+K04645+K03947+…
Human Diseases	Neurodegenerative diseases	Parkinson's disease	55	165	5.7645e-21	2.20698e-19	ko05012	ENSG00000164919;ENSG00000125356;ENSG00000127184;ENSG00000128271;ENSG00000164258;ENSG00000099624;ENSG00000135940;ENSG00000131143;ENSG00000119421;ENSG00000189043;ENSG00000151366;ENSG00000151366;ENSG00000090266;ENSG00000159199;ENSG00000164405;ENSG00000099795;ENSG00000176340;ENSG00000126267;ENSG00000166136;ENSG00000183648;ENSG00000116288;ENSG00000109390;ENSG00000170516;ENSG00000004779;ENSG00000167792…	K02268+K03945+K02272+K04266+K03937+K02134+K02265+K02263+K03952+K03948+K03968+K03968+K03958+K02128+K00418+K03963+K02273+K02267+K03964+K03957+K05687+K03967+K02271+K03955+K03942+K02264+K11352+K03940+K03965+K03962+K03936+K03941+K03946+K03950+K00419+K02271+K03938+K04554+K00416+K00416+K11353+K03951+K11351+K00420+K02138+K03959+K02135+K03939+K03947+K03956+K02131+K02270+K02137+K02266+K03966
Human Diseases	Neurodegenerative diseases	Alzheimer's disease	58	211	1.59254e-17	5.335e-16	ko05010	ENSG00000164919;ENSG00000125356;ENSG00000127184;ENSG00000164258;ENSG00000002330;ENSG00000099624;ENSG00000135940;ENSG00000131143;ENSG00000119421;ENSG00000189043;ENSG00000072506;ENSG00000151366;ENSG00000151366;ENSG00000090266;ENSG00000159199;ENSG00000164405;ENSG00000099795;ENSG00000176340;ENSG00000126267;ENSG00000166136;ENSG00000183648;ENSG00000109390;ENSG00000170516;ENSG00000004779;ENSG00000167792…	K02268+K03945+K02272+K03937+K02158+K02134+K02265+K02263+K03952+K03948+K08683+K03968+K03968+K03958+K02128+K00418+K03963+K02273+K02267+K03964+K03957+K03967+K02271+K03955+K03942+K02264+K11352+K03940+K03965+K03962+K03936+K03941+K03946+K03950+K00419+K02271+K03938+K00416+K00416+K11353+K03951+K04524+K11351+K00420+K02138+K03959+K04550+K02135+K03939+K03947+K03156+K03956+K06170+K02131+K02270+K02137+K02266+…
Human Diseases	Endocrine and metabolic diseases	Non-alcoholic fatty liver disease (NAFLD)	54	191	5.66951e-17	1.68826e-15	ko04932	ENSG00000164919;ENSG00000125356;ENSG00000169429;ENSG00000127184;ENSG00000127191;ENSG00000164258;ENSG00000135940;ENSG00000131143;ENSG00000119421;ENSG00000189043;ENSG00000136244;ENSG00000175197;ENSG00000151366;ENSG00000151366;ENSG00000090266;ENSG00000164405;ENSG00000099795;ENSG00000176340;ENSG00000126267;ENSG00000166136;ENSG00000183648;ENSG00000109390;ENSG00000170516;ENSG00000004779;ENSG00000167792…	K02268+K03945+K10030+K02272+K03173+K03937+K02265+K02263+K03952+K03948+K05405+K04452+K03968+K03968+K03958+K00418+K03963+K02273+K02267+K03964+K03957+K03967+K02271+K03955+K03942+K02264+K11352+K03940+K03965+K03962+K03936+K03941+K04374+K03946+K03950+K00419+K02271+K03938+K00416+K00416+K11353+K03951+K02159+K11351+K00420+K03959+K03939+K04448+K03947+K03156+K03956+K02270+K02266+K03966
Genetic Information Processing	Folding, sorting and degradation	Proteasome	15	61	7.33043e-05	0.00196456	ko03050	ENSG00000142507;ENSG00000101182;ENSG00000159377;ENSG00000108294;ENSG00000240065;ENSG00000106588;ENSG00000100911;ENSG00000136930;ENSG00000165916;ENSG00000087191;ENSG00000205220;ENSG00000127922;ENSG00000204264;ENSG00000132963;ENSG00000008018	K02738+K02731+K02736+K02735+K02741+K02726+K06697+K02739+K03065+K03066+K02733+K10881+K02740+K11599+K02732
Organismal Systems	Circulatory system	Cardiac muscle contraction	19	92	0.000111066	0.00270596	ko04260	ENSG00000164919;ENSG00000127184;ENSG00000135940;ENSG00000131143;ENSG00000164405;ENSG00000176340;ENSG00000126267;ENSG00000170516;ENSG00000178741;ENSG00000198336;ENSG00000198467;ENSG00000184076;ENSG00000131174;ENSG00000173660;ENSG00000173660;ENSG00000127540;ENSG00000137731;ENSG00000112695;ENSG00000111775	K02268+K02272+K02265+K02263+K00418+K02273+K02267+K02271+K02264+K12750+K10374+K00419+K02271+K00416+K00416+K00420+K01538+K02270+K02266
Metabolism	Nucleotide metabolism	Pyrimidine metabolism	21	125	0.000967061	0.0215977	ko00240	ENSG00000105258;ENSG00000125877;ENSG00000167900;ENSG00000205309;ENSG00000179958;ENSG00000115350;ENSG00000025708;ENSG00000099817;ENSG00000239672;ENSG00000198805;ENSG00000161980;ENSG00000103024;ENSG00000100142;ENSG00000011052;ENSG00000011052;ENSG00000005075;ENSG00000125458;ENSG00000243678;ENSG00000243678;ENSG00000168393;ENSG00000177700	K03017+K01519+K00857+K01081+K16904+K03506+K00758+K03013+K00940+K03783+K03019+K00940+K03014+K00940+K00940+K03008+K01081+K00940+K00940+K00943+K03007
Environmental Information Processing	Signal transduction	HIF-1 signaling pathway	18	116	0.00523902	0.108005	ko04066	ENSG00000112715;ENSG00000117394;ENSG00000103363;ENSG00000136244;ENSG00000170525;ENSG00000129521;ENSG00000100387;ENSG00000187840;ENSG00000106366;ENSG00000102265;ENSG00000269858;ENSG00000078401;ENSG00000159399;ENSG00000126934;ENSG00000152256;ENSG00000143437;ENSG00000154582;ENSG00000111674	K05448+K07299+K03873+K05405+K01103+K09592+K03868+K07205+K03982+K16451+K09592+K16366+K00844+K04369+K12077+K09097+K03872+K01689
Human Diseases	Cancers	Renal cell carcinoma	13	74	0.0058338	0.111675	ko05211	ENSG00000112715;ENSG00000174775;ENSG00000117394;ENSG00000103363;ENSG00000116016;ENSG00000129521;ENSG00000100387;ENSG00000269858;ENSG00000126934;ENSG00000177606;ENSG00000143437;ENSG00000154582;ENSG00000100311	K05448+K02833+K07299+K03873+K09095+K09592+K03868+K09592+K04369+K04448+K09097+K03872+K17386
Metabolism	Nucleotide metabolism	Purine metabolism	27	207	0.00867206	0.154941	ko00230	XLOC_007068;ENSG00000105258;ENSG00000125877;ENSG00000133805;ENSG00000205309;ENSG00000138735;ENSG00000115350;ENSG00000143774;ENSG00000185527;ENSG00000099817;ENSG00000239672;ENSG00000198805;ENSG00000161980;ENSG00000103024;ENSG00000100142;ENSG00000198931;ENSG00000011052;ENSG00000011052;ENSG00000114956;ENSG00000005075;ENSG00000162433;ENSG00000125458;ENSG00000243678;ENSG00000243678;ENSG00000177700;ENS…	K12319+K03017+K01519+K01490+K01081+K13762+K03506+K00942+K13759+K03013+K00940+K03783+K03019+K00940+K03014+K00759+K00940+K00940+K00904+K03008+K00939+K01081+K00940+K00940+K03007+K00939+K01490
Human Diseases	Cancers	Viral carcinogenesis	57	522	0.0108379	0.181535	ko05203	ENSG00000056558;ENSG00000179388;ENSG00000127191;ENSG00000002330;ENSG00000174775;ENSG00000197061;ENSG00000197061;ENSG00000197061;ENSG00000197061;ENSG00000197061;ENSG00000197061;ENSG00000197061;ENSG00000197061;ENSG00000197061;ENSG00000197061;ENSG00000197061;ENSG00000197061;ENSG00000197061;ENSG00000197061;ENSG00000124529;ENSG00000124529;ENSG00000124529;ENSG00000124529;ENSG00000124529;ENSG00000124529…	K03172+K12497+K03173+K02158+K02833+K11254+K11254+K11254+K11254+K11254+K11254+K11254+K11254+K11254+K11254+K11254+K11254+K11254+K11254+K11254+K11254+K11254+K11254+K11254+K11254+K11254+K11254+K11254+K11254+K11254+K11254+K11254+K11254+K15306+K11252+K10152+K04374+K04734+K11252+K02159+K11252+K11254+K11254+K11254+K11254+K11254+K11254+K11254+K11254+K11254+K11254+K11254+K11254+K11254+K11254+K04448+K12496
Metabolism	Carbohydrate metabolism	Fructose and mannose metabolism	7	35	0.0199294	0.314181	ko00051	ENSG00000170525;ENSG00000085662;ENSG00000132199;ENSG00000114268;ENSG00000138030;ENSG00000159399;ENSG00000123836	K01103+K00011+K18334+K19030+K00846+K00844+K19029
Genetic Information Processing	Transcription	Spliceosome	24	193	0.022002	0.327585	ko03040	XLOC_011163;ENSG00000143977;ENSG00000125835;ENSG00000173110;ENSG00000162385;ENSG00000162385;ENSG00000169976;ENSG00000160799;ENSG00000125743;ENSG00000124562;ENSG00000171960;ENSG00000141759;ENSG00000183684;ENSG00000167088;ENSG00000106245;ENSG00000130520;ENSG00000170860;ENSG00000100028;ENSG00000102103;ENSG00000182004;ENSG00000130332;ENSG00000139343;ENSG00000204389;ENSG00000204389	K12854+K11099+K11086+K03283+K12877+K12877+K12832+K12871+K11096+K11095+K09567+K12859+K12881+K11087+K12873+K12623+K12622+K11088+K12865+K11097+K12626+K11098+K03283+K03283
Human Diseases	Infectious diseases	Malaria	10	64	0.0314304	0.441057	ko05144	ENSG00000169429;ENSG00000136244;ENSG00000137801;ENSG00000188536;ENSG00000188536;ENSG00000123384;ENSG00000232810;ENSG00000108342;ENSG00000206172;ENSG00000206172	K10030+K05405+K16857+K13822+K13822+K04550+K03156+K05423+K13822+K13822
Human Diseases	Infectious diseases	Legionellosis	13	92	0.0329147	0.441057	ko05134	ENSG00000173110;ENSG00000169429;ENSG00000176171;ENSG00000136244;ENSG00000163739;ENSG00000170458;ENSG00000081041;ENSG00000163734;ENSG00000100906;ENSG00000232810;ENSG00000169896;ENSG00000204389;ENSG00000204389	K03283+K10030+K15464+K05405+K05505+K04391+K05505+K05505+K04734+K03156+K06461+K03283+K03283
Environmental Information Processing	Signal transduction	TNF signaling pathway	18	142	0.036776	0.469332	ko04668	XLOC_011054;XLOC_026608;ENSG00000056558;ENSG00000127191;ENSG00000136244;ENSG00000163739;ENSG00000115009;ENSG00000081041;ENSG00000128272;ENSG00000163734;ENSG00000100906;ENSG00000078401;ENSG00000128342;ENSG00000177606;ENSG00000023445;ENSG00000232810;ENSG00000164400;ENSG00000118503	K04466+K07210+K03172+K03173+K05405+K05505+K14625+K05505+K04374+K05505+K04734+K16366+K05419+K04448+K16060+K03156+K05427+K11859
Human Diseases	Cancers	Bladder cancer	8	49	0.0409812	0.47786	ko05219	ENSG00000112715;ENSG00000169429;ENSG00000068028;ENSG00000174775;ENSG00000136997;ENSG00000025708;ENSG00000137801;ENSG00000126934	K05448+K10030+K09850+K02833+K04377+K00758+K16857+K04369
Genetic Information Processing	Folding, sorting and degradation	Sulfur relay system	3	10	0.0410104	0.47786	ko04122	ENSG00000128311;ENSG00000142544;ENSG00000174177	K01011+K14168+K14169
Cellular Processes	Transport and catabolism	Peroxisome	12	86	0.0428729	0.478747	ko04146	ENSG00000126432;ENSG00000136881;ENSG00000110921;ENSG00000104823;ENSG00000142168;ENSG00000176894;ENSG00000254858;ENSG00000117450;ENSG00000163344;ENSG00000187630;ENSG00000157326;ENSG00000104883	K11187+K00659+K00869+K12663+K04565+K13347+K13348+K13279+K13273+K11147+K11147+K13353
Human Diseases	Infectious diseases	African trypanosomiasis	8	50	0.0454833	0.48758	ko05143	ENSG00000136244;ENSG00000100342;ENSG00000188536;ENSG00000188536;ENSG00000118137;ENSG00000232810;ENSG00000206172;ENSG00000206172	K05405+K14480+K13822+K13822+K08757+K03156+K13822+K13822
Metabolism	Glycan biosynthesis and metabolism	Glycosaminoglycan biosynthesis - chondroitin sulfate / dermatan sulfate	4	20	0.0724869	0.747173	ko00532	ENSG00000182022;ENSG00000147119;ENSG00000149541;ENSG00000171310	K08106+K04743+K10158+K01017
Organismal Systems	Immune system	NOD-like receptor signaling pathway	10	76	0.0840941	0.834712	ko04621	XLOC_026608;ENSG00000169429;ENSG00000136244;ENSG00000163739;ENSG00000104825;ENSG00000081041;ENSG00000100906;ENSG00000023445;ENSG00000232810;ENSG00000118503	K07210+K10030+K05405+K05505+K02581+K05505+K04734+K16060+K03156+K11859
Metabolism	Metabolism of cofactors and vitamins	Nicotinate and nicotinamide metabolism	5	32	0.11159	1	ko00760	ENSG00000205309;ENSG00000166741;ENSG00000198805;ENSG00000125458;ENSG00000147813	K01081+K00541+K03783+K01081+K00763
Genetic Information Processing	Folding, sorting and degradation	Protein processing in endoplasmic reticulum	21	205	0.153406	1	ko04141	ENSG00000089248;ENSG00000173110;ENSG00000127191;ENSG00000075826;ENSG00000129562;ENSG00000180879;ENSG00000175197;ENSG00000106803;ENSG00000100387;ENSG00000087074;ENSG00000120725;ENSG00000133265;ENSG00000086061;ENSG00000128272;ENSG00000107262;ENSG00000160087;ENSG00000103266;ENSG00000087088;ENSG00000109846;ENSG00000204389;ENSG00000204389	K09586+K03283+K03173+K14005+K12668+K04571+K04452+K09481+K03868+K14019+K14001+K09562+K09502+K04374+K09555+K04554+K09561+K02159+K09542+K03283+K03283
Metabolism	Metabolism of terpenoids and polyketides	Terpenoid backbone biosynthesis	4	26	0.153778	1	ko00900	ENSG00000148377;ENSG00000110921;ENSG00000167508;ENSG00000163344	K01823+K00869+K01597+K13273
Environmental Information Processing	Signal transduction	MAPK signaling pathway	31	318	0.156437	1	ko04010	XLOC_003443;XLOC_011054;XLOC_022223;XLOC_026608;ENSG00000173110;ENSG00000168970;ENSG00000104856;ENSG00000127191;ENSG00000174775;ENSG00000169750;ENSG00000130222;ENSG00000066468;ENSG00000175197;ENSG00000136997;ENSG00000099860;ENSG00000138166;ENSG00000170458;ENSG00000153233;ENSG00000101109;ENSG00000128272;ENSG00000106211;ENSG00000138834;ENSG00000120129;ENSG00000126934;ENSG00000177606;ENSG00000138675…	K04459+K04466+K04359+K07210+K03283+K16342+K09253+K03173+K02833+K07861+K04402+K05093+K04452+K04377+K04402+K04459+K04391+K04458+K04411+K04374+K04455+K04436+K04459+K04369+K04448+K04358+K03156+K17386+K04465+K03283+K03283
Organismal Systems	Immune system	Cytosolic DNA-sensing pathway	9	76	0.158027	1	ko04623	XLOC_026608;ENSG00000088888;ENSG00000136244;ENSG00000099817;ENSG00000104825;ENSG00000161980;ENSG00000100142;ENSG00000100906;ENSG00000177700	K07210+K12648+K05405+K03013+K02581+K03019+K03014+K04734+K03007
Genetic Information Processing	Transcription	RNA polymerase	6	46	0.163775	1	ko03020	ENSG00000105258;ENSG00000099817;ENSG00000161980;ENSG00000100142;ENSG00000005075;ENSG00000177700	K03017+K03013+K03019+K03014+K03008+K03007
Cellular Processes	Cell growth and death	p53 signaling pathway	9	78	0.176259	1	ko04115	ENSG00000130222;ENSG00000146674;ENSG00000112576;ENSG00000099860;ENSG00000137801;ENSG00000106366;ENSG00000120471;ENSG00000087088;ENSG00000105327	K04402+K10138+K10152+K04402+K16857+K03982+K13773+K02159+K10132
Environmental Information Processing	Signal transduction	NF-kappa B signaling pathway	15	144	0.185574	1	ko04064	XLOC_011054;XLOC_026608;ENSG00000056558;ENSG00000169429;ENSG00000104856;ENSG00000127191;ENSG00000099860;ENSG00000170458;ENSG00000081041;ENSG00000243414;ENSG00000100906;ENSG00000120659;ENSG00000023445;ENSG00000232810;ENSG00000118503	K04466+K07210+K03172+K10030+K09253+K03173+K04402+K04391+K05505+K05409+K04734+K05473+K16060+K03156+K11859
Genetic Information Processing	Folding, sorting and degradation	SNARE interactions in vesicular transport	5	38	0.189317	1	ko04130	ENSG00000170310;ENSG00000099365;ENSG00000118640;ENSG00000104915;ENSG00000113734	K08501+K08486+K08512+K08498+K08497
Environmental Information Processing	Signal transduction	VEGF signaling pathway	8	70	0.201892	1	ko04370	ENSG00000112715;ENSG00000168970;ENSG00000002330;ENSG00000174775;ENSG00000169750;ENSG00000176170;ENSG00000106211;ENSG00000126934	K05448+K16342+K02158+K02833+K07861+K04718+K04455+K04369
Metabolism	Amino acid metabolism	Arginine and proline metabolism	6	51	0.227354	1	ko00330	ENSG00000122884;ENSG00000130005;ENSG00000141504;ENSG00000116649;ENSG00000104524;ENSG00000088826	K00472+K00542+K00657+K00797+K00286+K12259
Human Diseases	Cancers	Pathways in cancer	42	462	0.228733	1	ko05200	ENSG00000112715;ENSG00000056558;ENSG00000169429;ENSG00000127191;ENSG00000002330;ENSG00000068028;ENSG00000174775;ENSG00000167083;ENSG00000169750;ENSG00000160271;ENSG00000117394;ENSG00000103363;ENSG00000136244;ENSG00000066468;ENSG00000136997;ENSG00000169031;ENSG00000116016;ENSG00000089685;ENSG00000129521;ENSG00000121966;ENSG00000123975;ENSG00000084207;ENSG00000100387;ENSG00000101109;ENSG00000066336…	K05448+K03172+K10030+K03173+K02158+K09850+K02833+K04549+K07861+K08732+K07299+K03873+K05405+K05093+K04377+K06237+K09095+K08731+K09592+K04189+K02219+K00799+K03868+K04411+K09438+K09592+K04734+K04537+K16859+K02159+K04546+K04261+K04369+K04448+K04358+K09097+K16060+K01064+K06237+K03872+K17386+K02219
Metabolism	Amino acid metabolism	Glycine, serine and threonine metabolism	5	41	0.233863	1	ko00260	XLOC_023522;ENSG00000130005;ENSG00000145020;ENSG00000092621;ENSG00000139410	K15789+K00542+K00605+K00058+K17989
Human Diseases	Infectious diseases	Hepatitis B	18	185	0.237204	1	ko05161	ENSG00000169429;ENSG00000179388;ENSG00000002330;ENSG00000174775;ENSG00000088888;ENSG00000136244;ENSG00000136997;ENSG00000089685;ENSG00000170581;ENSG00000128272;ENSG00000243414;ENSG00000120899;ENSG00000100906;ENSG00000087088;ENSG00000126934;ENSG00000177606;ENSG00000232810;ENSG00000122877	K10030+K12497+K02158+K02833+K12648+K05405+K04377+K08731+K11221+K04374+K05409+K05871+K04734+K02159+K04369+K04448+K03156+K12496
Human Diseases	Neurodegenerative diseases	Amyotrophic lateral sclerosis (ALS)	7	63	0.24466	1	ko05014	ENSG00000002330;ENSG00000142168;ENSG00000233276;ENSG00000087088;ENSG00000135406;ENSG00000173992;ENSG00000232810	K02158+K04565+K00432+K02159+K07607+K04569+K03156
Human Diseases	Infectious diseases	Salmonella infection	11	107	0.245175	1	ko05132	ENSG00000169429;ENSG00000136244;ENSG00000163739;ENSG00000170458;ENSG00000081041;ENSG00000163734;ENSG00000108518;ENSG00000130429;ENSG00000136950;ENSG00000177606;ENSG00000164400	K10030+K05405+K05505+K04391+K05505+K05505+K05759+K05757+K05754+K04448+K05427
Genetic Information Processing	Replication and repair	DNA replication	5	43	0.265046	1	ko03030	ENSG00000106399;ENSG00000115350;ENSG00000168496;ENSG00000172922;ENSG00000104889	K10740+K03506+K04799+K10745+K10743
Human Diseases	Neurodegenerative diseases	Prion diseases	6	55	0.282993	1	ko05020	ENSG00000136244;ENSG00000120738;ENSG00000142168;ENSG00000087088;ENSG00000126934;ENSG00000204389	K05405+K09203+K04565+K02159+K04369+K03283
Metabolism	Amino acid metabolism	Valine, leucine and isoleucine biosynthesis	1	4	0.286144	1	ko00290	ENSG00000139410	K17989
Metabolism	Metabolism of other amino acids	Glutathione metabolism	6	56	0.297366	1	ko00480	ENSG00000084207;ENSG00000233276;ENSG00000148834;ENSG00000116649;ENSG00000065621;ENSG00000167468	K00799+K00432+K00799+K00797+K00799+K05361
Genetic Information Processing	Folding, sorting and degradation	Protein export	3	24	0.305945	1	ko03060	ENSG00000153037;ENSG00000106803;ENSG00000144867	K03105+K09481+K12272
Human Diseases	Cancers	Central carbon metabolism in cancer	8	80	0.318079	1	ko05230	ENSG00000174775;ENSG00000117394;ENSG00000066468;ENSG00000136997;ENSG00000159399;ENSG00000126934;ENSG00000152256;ENSG00000130489	K02833+K07299+K05093+K04377+K00844+K04369+K12077+K07152
Genetic Information Processing	Translation	Ribosome biogenesis in eukaryotes	10	104	0.330525	1	ko03008	ENSG00000145912;ENSG00000172336;ENSG00000162231;ENSG00000189306;ENSG00000182117;ENSG00000242372;ENSG00000167272;ENSG00000132661;ENSG00000105202;ENSG00000164967	K11129+K14527+K14284+K14545+K11130+K03264+K03537+K14285+K14563+K14525
Genetic Information Processing	Replication and repair	Base excision repair	4	36	0.331247	1	ko03410	ENSG00000103152;ENSG00000115350;ENSG00000168496;ENSG00000065057	K03652+K03506+K04799+K10773
Human Diseases	Cancers	Colorectal cancer	7	73	0.376455	1	ko05210	ENSG00000002330;ENSG00000169750;ENSG00000160271;ENSG00000136997;ENSG00000089685;ENSG00000087088;ENSG00000177606	K02158+K07861+K08732+K04377+K08731+K02159+K04448
Metabolism	Biosynthesis of other secondary metabolites	Butirosin and neomycin biosynthesis	1	6	0.396902	1	ko00524	ENSG00000159399	K00844
Organismal Systems	Immune system	Fc epsilon RI signaling pathway	8	87	0.405764	1	ko04664	ENSG00000168970;ENSG00000174775;ENSG00000169750;ENSG00000033327;ENSG00000168918;ENSG00000126934;ENSG00000232810;ENSG00000164400	K16342+K02833+K07861+K08091+K03084+K04369+K03156+K05427
Metabolism	Amino acid metabolism	Cysteine and methionine metabolism	4	40	0.406782	1	ko00270	ENSG00000128311;ENSG00000166796;ENSG00000116649;ENSG00000139410	K01011+K00016+K00797+K17989
Environmental Information Processing	Signal transduction	TGF-beta signaling pathway	9	99	0.40719	1	ko04350	ENSG00000122641;ENSG00000136997;ENSG00000100387;ENSG00000137801;ENSG00000156466;ENSG00000115738;ENSG00000104899;ENSG00000232810;ENSG00000139269	K04667+K04377+K03868+K16857+K04664+K17693+K04665+K03156+K04667
Human Diseases	Infectious diseases	Shigellosis	7	76	0.417234	1	ko05131	ENSG00000169429;ENSG00000104825;ENSG00000108518;ENSG00000100906;ENSG00000130429;ENSG00000136950;ENSG00000116670	K10030+K02581+K05759+K04734+K05757+K05754+K13728
Metabolism	Lipid metabolism	Primary bile acid biosynthesis	2	18	0.433419	1	ko00120	ENSG00000099377;ENSG00000136881	K12408+K00659
Cellular Processes	Cell growth and death	Cell cycle	12	138	0.439467	1	ko04110	ENSG00000176386;ENSG00000130222;ENSG00000136997;ENSG00000112576;ENSG00000099860;ENSG00000100387;ENSG00000164611;ENSG00000091651;ENSG00000141552;ENSG00000116670;ENSG00000127564;ENSG00000129757	K03359+K04402+K04377+K10152+K04402+K03868+K06635+K02608+K03358+K13728+K06633+K09993
Organismal Systems	Immune system	RIG-I-like receptor signaling pathway	8	90	0.443567	1	ko04622	XLOC_026608;ENSG00000169429;ENSG00000127191;ENSG00000088888;ENSG00000104825;ENSG00000100906;ENSG00000187608;ENSG00000232810	K07210+K10030+K03173+K12648+K02581+K04734+K12159+K03156
Human Diseases	Infectious diseases	Amoebiasis	12	139	0.449597	1	ko05146	ENSG00000169429;ENSG00000158473;ENSG00000136244;ENSG00000169031;ENSG00000163739;ENSG00000170458;ENSG00000106211;ENSG00000081052;ENSG00000232810;ENSG00000169896;ENSG00000164400;ENSG00000168542	K10030+K06448+K05405+K06237+K05505+K04391+K04455+K06237+K03156+K06461+K05427+K06236
Human Diseases	Cancers	Choline metabolism in cancer	10	115	0.452791	1	ko05231	ENSG00000168970;ENSG00000174775;ENSG00000169750;ENSG00000160271;ENSG00000187840;ENSG00000141934;ENSG00000077044;ENSG00000126934;ENSG00000177606;ENSG00000100311	K16342+K02833+K07861+K08732+K07205+K01080+K00901+K04369+K04448+K17386
Organismal Systems	Digestive system	Protein digestion and absorption	10	115	0.452791	1	ko04974	ENSG00000169031;ENSG00000164626;ENSG00000010438;ENSG00000168003;ENSG00000106688;ENSG00000137731;ENSG00000081052;ENSG00000141434;ENSG00000168542;ENSG00000112394	K06237+K04916+K01312+K06519+K05612+K01538+K06237+K08606+K06236+K08187
Organismal Systems	Development	Axon guidance	12	140	0.459709	1	ko04360	ENSG00000172602;ENSG00000174775;ENSG00000172757;ENSG00000169750;ENSG00000044524;ENSG00000095539;ENSG00000121966;ENSG00000130827;ENSG00000185033;ENSG00000173156;ENSG00000138623;ENSG00000182511	K07531+K02833+K05765+K07861+K05104+K06521+K04189+K06820+K06521+K07530+K06529+K07527
Metabolism	Energy metabolism	Nitrogen metabolism	2	19	0.461514	1	ko00910	ENSG00000107159;ENSG00000074410	K01672+K01672
Organismal Systems	Excretory system	Aldosterone-regulated sodium reabsorption	4	43	0.462374	1	ko04960	ENSG00000176387;ENSG00000065054;ENSG00000137731;ENSG00000118515	K00071+K13358+K01538+K13302
Organismal Systems	Environmental adaptation	Circadian rhythm	3	31	0.463065	1	ko04710	ENSG00000100387;ENSG00000134107;ENSG00000069667	K03868+K03729+K08532
Metabolism	Metabolism of other amino acids	beta-Alanine metabolism	3	31	0.463065	1	ko00410	ENSG00000127884;ENSG00000116649;ENSG00000088826	K07511+K00797+K12259
Genetic Information Processing	Folding, sorting and degradation	Ubiquitin mediated proteolysis	14	165	0.465208	1	ko04120	XLOC_008230;XLOC_008534;ENSG00000176386;ENSG00000114125;ENSG00000103363;ENSG00000108106;ENSG00000100387;ENSG00000099804;ENSG00000198642;ENSG00000160087;ENSG00000103266;ENSG00000141552;ENSG00000023445;ENSG00000154582	K10595+K10595+K03359+K10611+K03873+K10583+K03868+K02207+K10447+K04554+K09561+K03358+K16060+K03872
Environmental Information Processing	Signal transduction	FoxO signaling pathway	13	156	0.496335	1	ko04068	ENSG00000118046;ENSG00000174775;ENSG00000170296;ENSG00000176171;ENSG00000130222;ENSG00000136244;ENSG00000099860;ENSG00000173846;ENSG00000101109;ENSG00000145632;ENSG00000126934;ENSG00000051128;ENSG00000118515	K07298+K02833+K08341+K15464+K04402+K05405+K04402+K08862+K04411+K08861+K04369+K15010+K13302
Environmental Information Processing	Signal transduction	mTOR signaling pathway	6	71	0.516874	1	ko04150	ENSG00000112715;ENSG00000118046;ENSG00000167965;ENSG00000187840;ENSG00000168209;ENSG00000232810	K05448+K07298+K08266+K07205+K08270+K03156
Human Diseases	Cancers	Acute myeloid leukemia	6	71	0.516874	1	ko05221	ENSG00000002330;ENSG00000174775;ENSG00000136997;ENSG00000187840;ENSG00000066336;ENSG00000126934	K02158+K02833+K04377+K07205+K09438+K04369
Organismal Systems	Digestive system	Mineral absorption	5	59	0.524165	1	ko04978	ENSG00000087086;ENSG00000157765;ENSG00000147804;ENSG00000177556;ENSG00000137731	K13625+K14683+K14710+K07213+K01538
Organismal Systems	Immune system	B cell receptor signaling pathway	8	97	0.529867	1	ko04662	XLOC_026608;ENSG00000174775;ENSG00000169750;ENSG00000168918;ENSG00000104825;ENSG00000100906;ENSG00000126934;ENSG00000177606	K07210+K02833+K07861+K03084+K02581+K04734+K04369+K04448
Human Diseases	Cancers	Small cell lung cancer	9	110	0.535282	1	ko05222	ENSG00000056558;ENSG00000127191;ENSG00000136997;ENSG00000169031;ENSG00000123975;ENSG00000100906;ENSG00000023445;ENSG00000081052;ENSG00000173207	K03172+K03173+K04377+K06237+K02219+K04734+K16060+K06237+K02219
Human Diseases	Cancers	Prostate cancer	8	99	0.553659	1	ko05215	ENSG00000002330;ENSG00000174775;ENSG00000066468;ENSG00000084207;ENSG00000128272;ENSG00000100906;ENSG00000126934;ENSG00000100311	K02158+K02833+K05093+K00799+K04374+K04734+K04369+K17386
Cellular Processes	Cell growth and death	Apoptosis	9	112	0.557615	1	ko04210	XLOC_011054;XLOC_026608;ENSG00000127191;ENSG00000002330;ENSG00000100906;ENSG00000087088;ENSG00000023445;ENSG00000232810;ENSG00000167136	K04466+K07210+K03173+K02158+K04734+K02159+K16060+K03156+K01173
Metabolism	Energy metabolism	Sulfur metabolism	1	10	0.569585	1	ko00920	ENSG00000128311	K01011
Metabolism	Carbohydrate metabolism	Amino sugar and nucleotide sugar metabolism	4	50	0.583408	1	ko00520	ENSG00000159399;ENSG00000102032;ENSG00000108479;ENSG00000095380	K00844+K01787+K00849+K05304
Organismal Systems	Digestive system	Fat digestion and absorption	4	50	0.583408	1	ko04975	ENSG00000165029;ENSG00000015520;ENSG00000141934;ENSG00000118137	K05641+K14461+K01080+K08757
Metabolism	Carbohydrate metabolism	Galactose metabolism	3	37	0.584359	1	ko00052	ENSG00000085662;ENSG00000159399;ENSG00000108479	K00011+K00844+K00849
Metabolism	Lipid metabolism	Biosynthesis of unsaturated fatty acids	2	24	0.588697	1	ko01040	ENSG00000136881;ENSG00000099797	K00659+K10258
Genetic Information Processing	Replication and repair	Fanconi anemia pathway	6	77	0.598084	1	ko03460	ENSG00000132207;ENSG00000132207;ENSG00000130997;ENSG00000100726;ENSG00000106399;ENSG00000169689	K15078+K15078+K16618+K11137+K10740+K15360
Metabolism	Metabolism of other amino acids	Taurine and hypotaurine metabolism	1	11	0.604406	1	ko00430	ENSG00000136881	K00659
Metabolism	Lipid metabolism	Steroid biosynthesis	2	25	0.611298	1	ko00100	XLOC_002898;ENSG00000147383	K13373+K07748
Organismal Systems	Excretory system	Proximal tubule bicarbonate reclamation	2	25	0.611298	1	ko04964	ENSG00000183048;ENSG00000137731	K13577+K01538
Metabolism	Xenobiotics biodegradation and metabolism	Metabolism of xenobiotics by cytochrome P450	7	92	0.622232	1	ko00980	XLOC_001234;ENSG00000100197;ENSG00000187134;ENSG00000084207;ENSG00000159231;ENSG00000148834;ENSG00000065621	K15303+K17712+K00089+K00799+K00084+K00799+K00799
Organismal Systems	Immune system	T cell receptor signaling pathway	10	132	0.631791	1	ko04660	XLOC_011054;XLOC_026608;ENSG00000174775;ENSG00000104825;ENSG00000100906;ENSG00000126934;ENSG00000177606;ENSG00000232810;ENSG00000135605;ENSG00000164400	K04466+K07210+K02833+K02581+K04734+K04369+K04448+K03156+K07364+K05427
Metabolism	Glycan biosynthesis and metabolism	Glycosaminoglycan biosynthesis - heparan sulfate / heparin	2	26	0.632938	1	ko00534	ENSG00000166507;ENSG00000149541	K02577+K10158
Organismal Systems	Development	Osteoclast differentiation	16	210	0.635585	1	ko04380	XLOC_011054;XLOC_026608;ENSG00000104856;ENSG00000127191;ENSG00000033327;ENSG00000170581;ENSG00000066336;ENSG00000100906;ENSG00000120659;ENSG00000175592;ENSG00000177606;ENSG00000125740;ENSG00000232810;ENSG00000135605;ENSG00000075426;ENSG00000051523	K04466+K07210+K09253+K03173+K08091+K11221+K09438+K04734+K05473+K04502+K04448+K09029+K03156+K07364+K09030+K08009
Genetic Information Processing	Translation	RNA transport	16	210	0.635585	1	ko03013	ENSG00000162385;ENSG00000162385;ENSG00000172336;ENSG00000162231;ENSG00000183054;ENSG00000183054;ENSG00000187840;ENSG00000183684;ENSG00000243056;ENSG00000167272;ENSG00000101104;ENSG00000132661;ENSG00000241370;ENSG00000131652;ENSG00000130811;ENSG00000164967	K12877+K12877+K14527+K14284+K12172+K12172+K07205+K12881+K18645+K03537+K13126+K14285+K03540+K13175+K03248+K14525
Organismal Systems	Immune system	Chemokine signaling pathway	17	223	0.636616	1	ko04062	XLOC_026608;ENSG00000169429;ENSG00000160683;ENSG00000174775;ENSG00000167083;ENSG00000151882;ENSG00000163739;ENSG00000121966;ENSG00000115009;ENSG00000104825;ENSG00000081041;ENSG00000170581;ENSG00000163734;ENSG00000120899;ENSG00000100906;ENSG00000172354;ENSG00000127920	K07210+K10030+K04190+K02833+K04549+K05513+K05505+K04189+K14625+K02581+K05505+K11221+K05505+K05871+K04734+K04537+K04546
Human Diseases	Cancers	Thyroid cancer	3	40	0.63806	1	ko05216	ENSG00000174775;ENSG00000136997;ENSG00000126934	K02833+K04377+K04369
Environmental Information Processing	Signal transduction	Ras signaling pathway	20	262	0.640011	1	ko04014	XLOC_022223;XLOC_026608;ENSG00000112715;ENSG00000168970;ENSG00000002330;ENSG00000068028;ENSG00000174775;ENSG00000167083;ENSG00000169750;ENSG00000160271;ENSG00000066468;ENSG00000033327;ENSG00000101109;ENSG00000172354;ENSG00000119630;ENSG00000127920;ENSG00000126934;ENSG00000138675;ENSG00000100311;ENSG00000197283	K04359+K07210+K05448+K16342+K02158+K09850+K02833+K04549+K07861+K08732+K05093+K08091+K04411+K04537+K16859+K04546+K04369+K04358+K17386+K17631
Organismal Systems	Digestive system	Vitamin digestion and absorption	2	27	0.653625	1	ko04977	ENSG00000107611;ENSG00000118137	K14616+K08757
Organismal Systems	Endocrine system	Adipocytokine signaling pathway	7	95	0.656109	1	ko04920	XLOC_026608;ENSG00000127191;ENSG00000118046;ENSG00000117394;ENSG00000104825;ENSG00000100906;ENSG00000232810	K07210+K03173+K07298+K07299+K02581+K04734+K03156
Human Diseases	Infectious diseases	Epithelial cell signaling in Helicobacter pylori infection	6	82	0.659798	1	ko05120	ENSG00000169429;ENSG00000163739;ENSG00000100906;ENSG00000117410;ENSG00000177606;ENSG00000113732	K10030+K05505+K04734+K03661+K04448+K02153
Cellular Processes	Cell motility	Regulation of actin cytoskeleton	18	241	0.673014	1	ko04810	XLOC_004320;XLOC_022223;ENSG00000083457;ENSG00000174775;ENSG00000172757;ENSG00000169750;ENSG00000066468;ENSG00000170458;ENSG00000108518;ENSG00000205542;ENSG00000130429;ENSG00000136950;ENSG00000126934;ENSG00000138675;ENSG00000101306;ENSG00000100311;ENSG00000169896;ENSG00000183856	K05699+K04359+K06524+K02833+K05765+K07861+K05093+K04391+K05759+K05764+K05757+K05754+K04369+K04358+K00907+K17386+K06461+K05767
Metabolism	Carbohydrate metabolism	Propanoate metabolism	2	28	0.673372	1	ko00640	ENSG00000127884;ENSG00000166796	K07511+K00016
Genetic Information Processing	Folding, sorting and degradation	RNA degradation	8	111	0.683843	1	ko03018	ENSG00000159388;ENSG00000135473;ENSG00000130520;ENSG00000101104;ENSG00000170860;ENSG00000178896;ENSG00000130332;ENSG00000111674	K14443+K12571+K12623+K13126+K12622+K11600+K12626+K01689
Metabolism	Carbohydrate metabolism	Glyoxylate and dicarboxylate metabolism	2	29	0.692194	1	ko00630	ENSG00000145020;ENSG00000184207	K00605+K19269
Metabolism	Glycan biosynthesis and metabolism	Glycosylphosphatidylinositol(GPI)-anchor biosynthesis	2	30	0.710113	1	ko00563	ENSG00000136908;ENSG00000197858	K09658+K05289
Human Diseases	Cancers	Chronic myeloid leukemia	6	87	0.715265	1	ko05220	ENSG00000002330;ENSG00000174775;ENSG00000136997;ENSG00000033327;ENSG00000100906;ENSG00000126934	K02158+K02833+K04377+K08091+K04734+K04369
Organismal Systems	Immune system	Hematopoietic cell lineage	9	128	0.716681	1	ko04640	ENSG00000158473;ENSG00000136244;ENSG00000170458;ENSG00000185245;ENSG00000232810;ENSG00000169896;ENSG00000108342;ENSG00000164400;ENSG00000203618	K06448+K05405+K04391+K06261+K03156+K06461+K05423+K05427+K06262
Environmental Information Processing	Signal transduction	Hippo signaling pathway	12	170	0.729932	1	ko04390	ENSG00000068028;ENSG00000136997;ENSG00000112576;ENSG00000089685;ENSG00000118523;ENSG00000106366;ENSG00000156466;ENSG00000115738;ENSG00000104899;ENSG00000105327;ENSG00000143816;ENSG00000019549	K09850+K04377+K10152+K08731+K06827+K03982+K04664+K17693+K04665+K10132+K01064+K05706
Metabolism	Lipid metabolism	Ether lipid metabolism	3	46	0.730302	1	ko00565	ENSG00000168970;ENSG00000079462;ENSG00000141934	K16342+K16795+K01080
Organismal Systems	Endocrine system	GnRH signaling pathway	7	103	0.737021	1	ko04912	ENSG00000168970;ENSG00000174775;ENSG00000128272;ENSG00000120899;ENSG00000147437;ENSG00000126934;ENSG00000177606	K16342+K02833+K04374+K05871+K05252+K04369+K04448
Organismal Systems	Immune system	Leukocyte transendothelial migration	10	145	0.744908	1	ko04670	XLOC_004320;ENSG00000184697;ENSG00000168421;ENSG00000121966;ENSG00000074966;ENSG00000120899;ENSG00000149564;ENSG00000177300;ENSG00000169896;ENSG00000051523	K05699+K06087+K07873+K04189+K08016+K05871+K06787+K06087+K06461+K08009
Human Diseases	Infectious diseases	Pathogenic Escherichia coli infection	5	76	0.746096	1	ko05130	ENSG00000258947;ENSG00000183785;ENSG00000170458;ENSG00000130429;ENSG00000136950	K07375+K07374+K04391+K05757+K05754
Organismal Systems	Nervous system	Synaptic vesicle cycle	5	76	0.746096	1	ko04721	ENSG00000099365;ENSG00000042753;ENSG00000117410;ENSG00000175416;ENSG00000113732	K08486+K11827+K03661+K04645+K02153
Organismal Systems	Digestive system	Bile secretion	5	77	0.756375	1	ko04976	ENSG00000117394;ENSG00000012504;ENSG00000264324;ENSG00000136881;ENSG00000137731	K07299+K08537+K13857+K00659+K01538
Human Diseases	Cancers	Non-small cell lung cancer	5	77	0.756375	1	ko05223	ENSG00000002330;ENSG00000068028;ENSG00000174775;ENSG00000101109;ENSG00000126934	K02158+K09850+K02833+K04411+K04369
Metabolism	Lipid metabolism	Fatty acid elongation	2	33	0.758685	1	ko00062	ENSG00000127884;ENSG00000099797	K07511+K10258
Organismal Systems	Endocrine system	Thyroid hormone signaling pathway	10	147	0.760013	1	ko04919	ENSG00000002330;ENSG00000174775;ENSG00000117394;ENSG00000136997;ENSG00000159200;ENSG00000126934;ENSG00000137731;ENSG00000123836;ENSG00000160563;ENSG00000112394	K02158+K02833+K07299+K04377+K17901+K04369+K01538+K19029+K15170+K08187
Human Diseases	Cancers	Endometrial cancer	4	63	0.760382	1	ko05213	ENSG00000002330;ENSG00000174775;ENSG00000136997;ENSG00000126934	K02158+K02833+K04377+K04369
Metabolism	Amino acid metabolism	Phenylalanine metabolism	1	17	0.761587	1	ko00360	ENSG00000240972	K07253
Organismal Systems	Endocrine system	PPAR signaling pathway	5	78	0.766339	1	ko03320	ENSG00000170231;ENSG00000164687;ENSG00000155368;ENSG00000121769;ENSG00000118137	K08755+K08754+K08762+K08752+K08757
Cellular Processes	Cellular commiunity	Gap junction	7	107	0.772116	1	ko04540	XLOC_007068;XLOC_022223;ENSG00000258947;ENSG00000174775;ENSG00000183785;ENSG00000126934;ENSG00000100311	K12319+K04359+K07375+K02833+K07374+K04369+K17386
Organismal Systems	Endocrine system	Renin secretion	5	79	0.775992	1	ko04924	XLOC_001628;XLOC_007068;ENSG00000182500;ENSG00000169252;ENSG00000171522	K01380+K12319+K16056+K04142+K04261
Genetic Information Processing	Replication and repair	Non-homologous end-joining	1	18	0.780891	1	ko03450	ENSG00000168496	K04799
Metabolism	Metabolism of cofactors and vitamins	Pantothenate and CoA biosynthesis	1	18	0.780891	1	ko00770	ENSG00000138621	K01598
Metabolism	Glycan biosynthesis and metabolism	Other types of O-glycan biosynthesis	2	35	0.787018	1	ko00514	ENSG00000112309;ENSG00000169733	K10157+K05948
Genetic Information Processing	Replication and repair	Homologous recombination	2	35	0.787018	1	ko03440	ENSG00000106399;ENSG00000127922	K10740+K10881
Organismal Systems	Circulatory system	Vascular smooth muscle contraction	10	151	0.788334	1	ko04270	XLOC_007068;ENSG00000168970;ENSG00000128271;ENSG00000110680;ENSG00000078401;ENSG00000127129;ENSG00000196465;ENSG00000126934;ENSG00000092841;ENSG00000101306	K12319+K16342+K04266+K12332+K16366+K16367+K12751+K04369+K12751+K00907
Metabolism	Lipid metabolism	Arachidonic acid metabolism	4	66	0.791672	1	ko00590	ENSG00000168970;ENSG00000159231;ENSG00000233276;ENSG00000012779	K16342+K00084+K00432+K00461
Human Diseases	Cancers	Melanoma	5	81	0.794375	1	ko05218	ENSG00000002330;ENSG00000174775;ENSG00000126934;ENSG00000138675;ENSG00000100311	K02158+K02833+K04369+K04358+K17386
Organismal Systems	Immune system	Fc gamma R-mediated phagocytosis	7	110	0.796097	1	ko04666	ENSG00000172757;ENSG00000176170;ENSG00000033327;ENSG00000168918;ENSG00000141934;ENSG00000130429;ENSG00000136950	K05765+K04718+K08091+K03084+K01080+K05757+K05754
Environmental Information Processing	Signal transduction	ErbB signaling pathway	6	96	0.798625	1	ko04012	ENSG00000002330;ENSG00000174775;ENSG00000136997;ENSG00000187840;ENSG00000126934;ENSG00000177606	K02158+K02833+K04377+K07205+K04369+K04448
Organismal Systems	Nervous system	Serotonergic synapse	8	125	0.802074	1	ko04726	ENSG00000168970;ENSG00000174775;ENSG00000167083;ENSG00000100197;ENSG00000172354;ENSG00000127920;ENSG00000120129;ENSG00000012779	K16342+K02833+K04549+K17712+K04537+K04546+K04459+K00461
Organismal Systems	Excretory system	Endocrine and other factor-regulated calcium reabsorption	3	52	0.803013	1	ko04961	ENSG00000042753;ENSG00000137731;ENSG00000175416	K11827+K01538+K04645
Environmental Information Processing	Signal transduction	PI3K-Akt signaling pathway	29	411	0.807675	1	ko04151	XLOC_022223;XLOC_026608;ENSG00000112715;ENSG00000002330;ENSG00000118046;ENSG00000174775;ENSG00000167083;ENSG00000136244;ENSG00000167965;ENSG00000066468;ENSG00000136997;ENSG00000169031;ENSG00000112576;ENSG00000104812;ENSG00000187840;ENSG00000137801;ENSG00000168209;ENSG00000128272;ENSG00000172354;ENSG00000119630;ENSG00000127920;ENSG00000126934;ENSG00000138675;ENSG00000081052;ENSG00000100311;ENSG000…	K04359+K07210+K05448+K02158+K07298+K02833+K04549+K05405+K08266+K05093+K04377+K06237+K10152+K00693+K07205+K16857+K08270+K04374+K04537+K16859+K04546+K04369+K04358+K06237+K17386+K04465+K05423+K13302+K06236
Organismal Systems	Nervous system	Long-term depression	4	68	0.810652	1	ko04730	XLOC_007068;ENSG00000168970;ENSG00000174775;ENSG00000126934	K12319+K16342+K02833+K04369
Metabolism	Glycan biosynthesis and metabolism	N-Glycan biosynthesis	3	53	0.813381	1	ko00510	ENSG00000129562;ENSG00000136908;ENSG00000179085	K12668+K09658+K09659
Organismal Systems	Immune system	Toll-like receptor signaling pathway	9	141	0.814629	1	ko04620	XLOC_026608;ENSG00000169429;ENSG00000136244;ENSG00000170458;ENSG00000243414;ENSG00000100906;ENSG00000126934;ENSG00000177606;ENSG00000232810	K07210+K10030+K05405+K04391+K05409+K04734+K04369+K04448+K03156
Environmental Information Processing	Signaling molecules and interaction	Cytokine-cytokine receptor interaction	23	334	0.82029	1	ko04060	XLOC_022223;ENSG00000122641;ENSG00000112715;ENSG00000169429;ENSG00000160683;ENSG00000151882;ENSG00000136244;ENSG00000163739;ENSG00000121966;ENSG00000115009;ENSG00000081041;ENSG00000186891;ENSG00000163734;ENSG00000156466;ENSG00000120659;ENSG00000104899;ENSG00000128342;ENSG00000232810;ENSG00000100311;ENSG00000108342;ENSG00000164400;ENSG00000139269;ENSG00000175505	K04359+K04667+K05448+K10030+K04190+K05513+K05405+K05505+K04189+K14625+K05505+K05154+K05505+K04664+K05473+K04665+K05419+K03156+K17386+K05423+K05427+K04667+K05421
Organismal Systems	Endocrine system	Oxytocin signaling pathway	12	184	0.8204	1	ko04921	XLOC_007068;ENSG00000168970;ENSG00000174775;ENSG00000142185;ENSG00000159200;ENSG00000116741;ENSG00000196465;ENSG00000126934;ENSG00000177606;ENSG00000092841;ENSG00000101306;ENSG00000168135	K12319+K16342+K02833+K04977+K17901+K18154+K12751+K04369+K04448+K12751+K00907+K04998
Environmental Information Processing	Signal transduction	Sphingolipid signaling pathway	9	142	0.82096	1	ko04071	ENSG00000177076;ENSG00000127191;ENSG00000174775;ENSG00000169750;ENSG00000176170;ENSG00000033327;ENSG00000087088;ENSG00000126934;ENSG00000232810	K01441+K03173+K02833+K07861+K04718+K08091+K02159+K04369+K03156
Human Diseases	Substance dependence	Cocaine addiction	3	54	0.823284	1	ko05030	ENSG00000128272;ENSG00000177606;ENSG00000125740	K04374+K04448+K09029
Human Diseases	Infectious diseases	Pertussis	8	129	0.828899	1	ko05133	ENSG00000169429;ENSG00000172757;ENSG00000136244;ENSG00000170458;ENSG00000243414;ENSG00000177606;ENSG00000232810;ENSG00000169896	K10030+K05765+K05405+K04391+K05409+K04448+K03156+K06461
Organismal Systems	Nervous system	GABAergic synapse	6	100	0.829056	1	ko04727	ENSG00000167083;ENSG00000170296;ENSG00000204681;ENSG00000172354;ENSG00000127920;ENSG00000102287	K04549+K08341+K04615+K04537+K04546+K05185
Human Diseases	Infectious diseases	Epstein-Barr virus infection	23	339	0.840468	1	ko05169	ENSG00000105258;ENSG00000173110;ENSG00000056558;ENSG00000104856;ENSG00000127191;ENSG00000136997;ENSG00000099817;ENSG00000104825;ENSG00000161980;ENSG00000100142;ENSG00000165916;ENSG00000087191;ENSG00000066336;ENSG00000005075;ENSG00000106211;ENSG00000100906;ENSG00000127922;ENSG00000177606;ENSG00000177700;ENSG00000204389;ENSG00000204389;ENSG00000118503;ENSG00000011243	K03017+K03283+K03172+K09253+K03173+K04377+K03013+K02581+K03019+K03014+K03065+K03066+K09438+K03008+K04455+K04734+K10881+K04448+K03007+K03283+K03283+K11859+K15978
Human Diseases	Endocrine and metabolic diseases	Insulin resistance	8	131	0.841209	1	ko04931	ENSG00000117394;ENSG00000136244;ENSG00000068976;ENSG00000104812;ENSG00000101255;ENSG00000100906;ENSG00000173281;ENSG00000232810	K07299+K05405+K00688+K00693+K19518+K04734+K07189+K03156
Organismal Systems	Endocrine system	Ovarian Steroidogenesis	3	56	0.841748	1	ko04913	XLOC_002898;ENSG00000168970;ENSG00000012779	K13373+K16342+K00461
Metabolism	Metabolism of cofactors and vitamins	One carbon pool by folate	1	22	0.843709	1	ko00670	ENSG00000145020	K00605
Metabolism	Lipid metabolism	Glycerolipid metabolism	4	72	0.844373	1	ko00561	ENSG00000132793;ENSG00000085662;ENSG00000141934;ENSG00000077044	K15728+K00011+K01080+K00901
Environmental Information Processing	Signal transduction	Notch signaling pathway	3	57	0.850338	1	ko04330	ENSG00000090932;ENSG00000205155;ENSG00000169733	K06051+K06170+K05948
Metabolism	Xenobiotics biodegradation and metabolism	Drug metabolism - other enzymes	3	57	0.850338	1	ko00983	ENSG00000125877;ENSG00000167900;ENSG00000025708	K01519+K00857+K00758
Cellular Processes	Cellular commiunity	Signaling pathways regulating pluripotency of stem cells	10	163	0.858593	1	ko04550	ENSG00000122641;ENSG00000174775;ENSG00000066468;ENSG00000136997;ENSG00000115738;ENSG00000128342;ENSG00000126934;ENSG00000143816;ENSG00000139269;ENSG00000204531	K04667+K02833+K05093+K04377+K17693+K05419+K04369+K01064+K04667+K09367
Human Diseases	Immune diseases	Rheumatoid arthritis	12	192	0.860806	1	ko05323	ENSG00000112715;ENSG00000169429;ENSG00000136244;ENSG00000163739;ENSG00000115009;ENSG00000120659;ENSG00000117410;ENSG00000177606;ENSG00000204252;ENSG00000232810;ENSG00000164400;ENSG00000113732	K05448+K10030+K05405+K05505+K14625+K05473+K03661+K04448+K06752+K03156+K05427+K02153
Genetic Information Processing	Replication and repair	Nucleotide excision repair	4	75	0.866219	1	ko03420	ENSG00000272047;ENSG00000106399;ENSG00000115350;ENSG00000100387	K10845+K10740+K03506+K03868
Metabolism	Global and Overview	Carbon metabolism	8	136	0.868928	1	ko01200	ENSG00000127884;ENSG00000145020;ENSG00000092621;ENSG00000130313;ENSG00000139410;ENSG00000159399;ENSG00000184207;ENSG00000111674	K07511+K00605+K00058+K01057+K17989+K00844+K19269+K01689
Human Diseases	Infectious diseases	Hepatitis C	10	166	0.872916	1	ko05160	ENSG00000169429;ENSG00000127191;ENSG00000002330;ENSG00000174775;ENSG00000088888;ENSG00000184697;ENSG00000170581;ENSG00000100906;ENSG00000177300;ENSG00000232810	K10030+K03173+K02158+K02833+K12648+K06087+K11221+K04734+K06087+K03156
Metabolism	Lipid metabolism	Sphingolipid metabolism	3	60	0.873714	1	ko00600	ENSG00000177076;ENSG00000176170;ENSG00000141934	K01441+K04718+K01080
Environmental Information Processing	Signal transduction	cGMP - PKG signaling pathway	12	195	0.873982	1	ko04022	XLOC_007068;ENSG00000002330;ENSG00000138735;ENSG00000128272;ENSG00000169252;ENSG00000058668;ENSG00000116741;ENSG00000126934;ENSG00000137731;ENSG00000101306;ENSG00000213999;ENSG00000213999	K12319+K02158+K13762+K04374+K04142+K05850+K18154+K04369+K01538+K00907+K09261+K09261
Cellular Processes	Cellular commiunity	Focal adhesion	16	252	0.875662	1	ko04510	XLOC_004320;XLOC_022223;ENSG00000112715;ENSG00000002330;ENSG00000174775;ENSG00000169750;ENSG00000169031;ENSG00000112576;ENSG00000137801;ENSG00000119630;ENSG00000177606;ENSG00000023445;ENSG00000081052;ENSG00000101306;ENSG00000100311;ENSG00000168542	K05699+K04359+K05448+K02158+K02833+K07861+K06237+K10152+K16857+K16859+K04448+K16060+K06237+K00907+K17386+K06236
Organismal Systems	Endocrine system	Renin-angiotensin system	1	25	0.878705	1	ko04614	XLOC_001628	K01380
Metabolism	Carbohydrate metabolism	Starch and sucrose metabolism	4	77	0.879277	1	ko00500	ENSG00000114480;ENSG00000068976;ENSG00000104812;ENSG00000159399	K00700+K00688+K00693+K00844
Cellular Processes	Cell growth and death	Oocyte meiosis	7	124	0.883323	1	ko04114	ENSG00000176386;ENSG00000100387;ENSG00000164611;ENSG00000141552;ENSG00000163806;ENSG00000116670;ENSG00000127564	K03359+K03868+K06635+K03358+K08694+K13728+K06633
Human Diseases	Cancers	MicroRNAs in cancer	11	183	0.883853	1	ko05206	ENSG00000112715;ENSG00000068028;ENSG00000174775;ENSG00000136997;ENSG00000146670;ENSG00000137801;ENSG00000168209;ENSG00000149418;ENSG00000102287;ENSG00000126934;ENSG00000100311	K05448+K09850+K02833+K04377+K17390+K16857+K08270+K08670+K05185+K04369+K17386
Human Diseases	Substance dependence	Amphetamine addiction	4	78	0.885382	1	ko05031	ENSG00000128272;ENSG00000198576;ENSG00000177606;ENSG00000125740	K04374+K15867+K04448+K09029
Metabolism	Lipid metabolism	alpha-Linolenic acid metabolism	1	26	0.888536	1	ko00592	ENSG00000168970	K16342
Metabolism	Carbohydrate metabolism	Pentose and glucuronate interconversions	2	46	0.896049	1	ko00040	ENSG00000085662;ENSG00000169738	K00011+K03331
Organismal Systems	Nervous system	Neurotrophin signaling pathway	8	142	0.896851	1	ko04722	ENSG00000002330;ENSG00000174775;ENSG00000104825;ENSG00000128272;ENSG00000100906;ENSG00000087088;ENSG00000126934;ENSG00000177606	K02158+K02833+K02581+K04374+K04734+K02159+K04369+K04448
Organismal Systems	Endocrine system	Progesterone-mediated oocyte maturation	5	96	0.896925	1	ko04914	ENSG00000176386;ENSG00000141552;ENSG00000163806;ENSG00000116670;ENSG00000127564	K03359+K03358+K08694+K13728+K06633
Metabolism	Glycan biosynthesis and metabolism	Glycosphingolipid biosynthesis - lacto and neolacto series	1	27	0.897571	1	ko00601	ENSG00000130383	K07633
Human Diseases	Infectious diseases	HTLV-I infection	27	412	0.898957	1	ko05166	ENSG00000176386;ENSG00000104856;ENSG00000174775;ENSG00000117394;ENSG00000136244;ENSG00000136997;ENSG00000099901;ENSG00000120738;ENSG00000112576;ENSG00000128016;ENSG00000115350;ENSG00000100300;ENSG00000128272;ENSG00000164611;ENSG00000066336;ENSG00000100906;ENSG00000163132;ENSG00000087088;ENSG00000175592;ENSG00000141552;ENSG00000177606;ENSG00000204252;ENSG00000143816;ENSG00000232810;ENSG00000100311…	K03359+K09253+K02833+K07299+K05405+K04377+K15306+K09203+K10152+K15308+K03506+K05770+K04374+K06635+K09438+K04734+K09341+K02159+K04502+K03358+K04448+K06752+K01064+K03156+K17386+K05427+K12496
Organismal Systems	Endocrine system	Estrogen signaling pathway	8	143	0.900983	1	ko04915	ENSG00000173110;ENSG00000174775;ENSG00000204681;ENSG00000128272;ENSG00000126934;ENSG00000177606;ENSG00000204389;ENSG00000204389	K03283+K02833+K04615+K04374+K04369+K04448+K03283+K03283
Human Diseases	Cancers	Pancreatic cancer	4	81	0.902108	1	ko05212	ENSG00000112715;ENSG00000002330;ENSG00000169750;ENSG00000160271	K05448+K02158+K07861+K08732
Metabolism	Lipid metabolism	Fatty acid degradation	2	47	0.902819	1	ko00071	ENSG00000127884;ENSG00000167969	K07511+K13238
Human Diseases	Endocrine and metabolic diseases	Maturity onset diabetes of the young	1	28	0.905875	1	ko04950	ENSG00000163623	K08030
Organismal Systems	Endocrine system	Glucagon signaling pathway	6	114	0.907658	1	ko04922	ENSG00000117394;ENSG00000068976;ENSG00000166796;ENSG00000104812;ENSG00000128272;ENSG00000142178	K07299+K00688+K00016+K00693+K04374+K19008
Human Diseases	Infectious diseases	Measles	11	190	0.909755	1	ko05162	ENSG00000173110;ENSG00000088888;ENSG00000136244;ENSG00000112576;ENSG00000104825;ENSG00000170581;ENSG00000100906;ENSG00000105327;ENSG00000204389;ENSG00000204389;ENSG00000118503	K03283+K12648+K05405+K10152+K02581+K11221+K04734+K10132+K03283+K03283+K11859
Genetic Information Processing	Transcription	Basal transcription factors	3	66	0.910971	1	ko03022	ENSG00000197780;ENSG00000272047;ENSG00000162227	K03127+K10845+K03131
Metabolism	Xenobiotics biodegradation and metabolism	Drug metabolism - cytochrome P450	4	83	0.912027	1	ko00982	ENSG00000100197;ENSG00000084207;ENSG00000148834;ENSG00000065621	K17712+K00799+K00799+K00799
Metabolism	Carbohydrate metabolism	Butanoate metabolism	1	29	0.913506	1	ko00650	ENSG00000127884	K07511
Environmental Information Processing	Signal transduction	Rap1 signaling pathway	14	236	0.916541	1	ko04015	XLOC_022223;ENSG00000112715;ENSG00000128271;ENSG00000174775;ENSG00000169750;ENSG00000160271;ENSG00000066468;ENSG00000137801;ENSG00000108518;ENSG00000119630;ENSG00000126934;ENSG00000138675;ENSG00000100311;ENSG00000169896	K04359+K05448+K04266+K02833+K07861+K08732+K05093+K16857+K05759+K16859+K04369+K04358+K17386+K06461
Metabolism	Lipid metabolism	Linoleic acid metabolism	1	30	0.92052	1	ko00591	ENSG00000168970	K16342
Metabolism	Global and Overview	Biosynthesis of amino acids	4	85	0.921041	1	ko01230	ENSG00000092621;ENSG00000139410;ENSG00000104524;ENSG00000111674	K00058+K17989+K00286+K01689
Human Diseases	Substance dependence	Morphine addiction	5	102	0.923442	1	ko05032	ENSG00000167083;ENSG00000204681;ENSG00000172354;ENSG00000127920;ENSG00000102287	K04549+K04615+K04537+K04546+K05185
Human Diseases	Infectious diseases	Vibrio cholerae infection	3	69	0.925585	1	ko05110	ENSG00000106803;ENSG00000117410;ENSG00000113732	K09481+K03661+K02153
Environmental Information Processing	Signal transduction	Hedgehog signaling pathway	2	51	0.925985	1	ko04340	ENSG00000163501;ENSG00000143816	K11989+K01064
Environmental Information Processing	Signal transduction	Wnt signaling pathway	8	151	0.929268	1	ko04310	ENSG00000169750;ENSG00000136997;ENSG00000112576;ENSG00000100387;ENSG00000181274;ENSG00000175592;ENSG00000177606;ENSG00000143816	K07861+K04377+K10152+K03868+K03096+K04502+K04448+K01064
Organismal Systems	Nervous system	Glutamatergic synapse	6	120	0.930355	1	ko04724	ENSG00000168970;ENSG00000167083;ENSG00000172354;ENSG00000127920;ENSG00000106688;ENSG00000051128	K16342+K04549+K04537+K04546+K05612+K15010
Organismal Systems	Immune system	Complement and coagulation cascades	6	122	0.936745	1	ko04610	ENSG00000178726;ENSG00000197766;ENSG00000009724;ENSG00000106366;ENSG00000117601;ENSG00000117525	K03907+K01334+K03993+K03982+K03911+K03901
Genetic Information Processing	Replication and repair	Mismatch repair	1	33	0.938333	1	ko03430	ENSG00000106399	K10740
Organismal Systems	Nervous system	Cholinergic synapse	6	123	0.939741	1	ko04725	ENSG00000174775;ENSG00000167083;ENSG00000128272;ENSG00000172354;ENSG00000127920;ENSG00000168135	K02833+K04549+K04374+K04537+K04546+K04998
Metabolism	Metabolism of cofactors and vitamins	Porphyrin and chlorophyll metabolism	2	54	0.939829	1	ko00860	ENSG00000165060;ENSG00000139428	K19054+K00798
Cellular Processes	Cellular commiunity	Adherens junction	4	91	0.943322	1	ko04520	XLOC_004320;ENSG00000169750;ENSG00000124216;ENSG00000019549	K05699+K07861+K05707+K05706
Metabolism	Glycan biosynthesis and metabolism	Mucin type O-glycan biosynthesis	1	34	0.943336	1	ko00512	ENSG00000187210	K00727
Metabolism	Amino acid metabolism	Valine, leucine and isoleucine degradation	2	55	0.943871	1	ko00280	ENSG00000072506;ENSG00000127884	K08683+K07511
Genetic Information Processing	Translation	mRNA surveillance pathway	6	125	0.945356	1	ko03015	ENSG00000162385;ENSG00000162385;ENSG00000162231;ENSG00000183684;ENSG00000101104;ENSG00000132661	K12877+K12877+K14284+K12881+K13126+K14285
Environmental Information Processing	Signaling molecules and interaction	ECM-receptor interaction	6	125	0.945356	1	ko04512	ENSG00000169031;ENSG00000137801;ENSG00000185245;ENSG00000081052;ENSG00000203618;ENSG00000168542	K06237+K16857+K06261+K06237+K06262+K06236
Environmental Information Processing	Signal transduction	cAMP signaling pathway	13	234	0.946992	1	ko04024	ENSG00000128271;ENSG00000002330;ENSG00000169750;ENSG00000182500;ENSG00000204681;ENSG00000169252;ENSG00000100906;ENSG00000058668;ENSG00000104899;ENSG00000126934;ENSG00000177606;ENSG00000125398;ENSG00000137731	K04266+K02158+K07861+K16056+K04615+K04142+K04734+K05850+K04665+K04369+K04448+K18435+K01538
Metabolism	Amino acid metabolism	Tyrosine metabolism	1	35	0.947933	1	ko00350	ENSG00000240972	K07253
Organismal Systems	Sensory system	Phototransduction	1	35	0.947933	1	ko04744	ENSG00000185527	K13759
Metabolism	Carbohydrate metabolism	Pentose phosphate pathway	1	35	0.947933	1	ko00030	ENSG00000130313	K01057
Organismal Systems	Nervous system	Long-term potentiation	3	75	0.948427	1	ko04720	ENSG00000174775;ENSG00000128272;ENSG00000126934	K02833+K04374+K04369
Organismal Systems	Environmental adaptation	Circadian entrainment	5	110	0.949332	1	ko04713	XLOC_007068;ENSG00000167083;ENSG00000108551;ENSG00000172354;ENSG00000127920	K12319+K04549+K07843+K04537+K04546
Human Diseases	Infectious diseases	Bacterial invasion of epithelial cells	4	93	0.949366	1	ko05100	ENSG00000130429;ENSG00000136950;ENSG00000175416;ENSG00000116670	K05757+K05754+K04645+K13728
Metabolism	Global and Overview	Fatty acid metabolism	2	57	0.951192	1	ko01212	ENSG00000127884;ENSG00000099797	K07511+K10258
Organismal Systems	Digestive system	Salivary secretion	5	111	0.951938	1	ko04970	XLOC_007068;ENSG00000169252;ENSG00000101439;ENSG00000058668;ENSG00000137731	K12319+K04142+K13899+K05850+K01538
Organismal Systems	Excretory system	Collecting duct acid secretion	1	36	0.952159	1	ko04966	ENSG00000113732	K02153
Metabolism	Metabolism of cofactors and vitamins	Retinol metabolism	3	77	0.95446	1	ko00830	ENSG00000187630;ENSG00000187630;ENSG00000157326	K11147+K11147+K11147
Metabolism	Carbohydrate metabolism	Glycolysis / Gluconeogenesis	3	78	0.957224	1	ko00010	ENSG00000166796;ENSG00000159399;ENSG00000111674	K00016+K00844+K01689
Organismal Systems	Endocrine system	Thyroid hormone synthesis	3	78	0.957224	1	ko04918	ENSG00000233276;ENSG00000128272;ENSG00000137731	K00432+K04374+K01538
Human Diseases	Cancers	Chemical carcinogenesis	4	96	0.957332	1	ko05204	ENSG00000084207;ENSG00000148834;ENSG00000065621;ENSG00000143437	K00799+K00799+K00799+K09097
Metabolism	Amino acid metabolism	Alanine, aspartate and glutamate metabolism	1	38	0.959609	1	ko00250	ENSG00000177181	K18311
Cellular Processes	Transport and catabolism	Regulation of autophagy	1	39	0.962888	1	ko04140	ENSG00000170296	K08341
Organismal Systems	Endocrine system	Insulin signaling pathway	8	166	0.963885	1	ko04910	ENSG00000002330;ENSG00000174775;ENSG00000068976;ENSG00000104812;ENSG00000187840;ENSG00000159399;ENSG00000126934;ENSG00000173281	K02158+K02833+K00688+K00693+K07205+K00844+K04369+K07189
Cellular Processes	Transport and catabolism	Endocytosis	21	363	0.964102	1	ko04144	XLOC_001105;XLOC_005459;XLOC_006032;XLOC_020908;ENSG00000173110;ENSG00000174775;ENSG00000159210;ENSG00000066468;ENSG00000042753;ENSG00000121966;ENSG00000160948;ENSG00000130724;ENSG00000254505;ENSG00000169252;ENSG00000130429;ENSG00000141971;ENSG00000136950;ENSG00000004059;ENSG00000175416;ENSG00000204389;ENSG00000204389	K18461+K18461+K18461+K06751+K03283+K02833+K12188+K05093+K11827+K04189+K12184+K12191+K12194+K04142+K05757+K12186+K05754+K07940+K04645+K03283+K03283
Organismal Systems	Endocrine system	Prolactin signaling pathway	3	81	0.9646	1	ko04917	ENSG00000174775;ENSG00000120659;ENSG00000126934	K02833+K05473+K04369
Metabolism	Lipid metabolism	Steroid hormone biosynthesis	3	81	0.9646	1	ko00140	XLOC_002898;ENSG00000187134;ENSG00000176387	K13373+K00089+K00071
Environmental Information Processing	Signal transduction	AMPK signaling pathway	6	134	0.965241	1	ko04152	ENSG00000118046;ENSG00000170525;ENSG00000104812;ENSG00000187840;ENSG00000114268;ENSG00000123836	K07298+K01103+K00693+K07205+K19030+K19029
Organismal Systems	Digestive system	Carbohydrate digestion and absorption	2	62	0.965716	1	ko04973	ENSG00000159399;ENSG00000137731	K00844+K01538
Human Diseases	Endocrine and metabolic diseases	Type II diabetes mellitus	2	62	0.965716	1	ko04930	ENSG00000159399;ENSG00000232810	K00844+K03156
Human Diseases	Cancers	Glioma	3	82	0.96678	1	ko05214	ENSG00000174775;ENSG00000126934;ENSG00000100311	K02833+K04369+K17386
Metabolism	Amino acid metabolism	Lysine degradation	2	63	0.968074	1	ko00310	ENSG00000127884;ENSG00000152952	K07511+K13645
Organismal Systems	Immune system	Platelet activation	8	169	0.968617	1	ko04611	XLOC_007068;ENSG00000168970;ENSG00000118640;ENSG00000182500;ENSG00000185245;ENSG00000101306;ENSG00000203618;ENSG00000168542	K12319+K16342+K08512+K16056+K06261+K00907+K06262+K06236
Human Diseases	Substance dependence	Nicotine addiction	1	41	0.96867	1	ko05033	ENSG00000102287	K05185
Metabolism	Amino acid metabolism	Tryptophan metabolism	1	42	0.971214	1	ko00380	ENSG00000127884	K07511
Organismal Systems	Immune system	Intestinal immune network for IgA production	5	125	0.977628	1	ko04672	XLOC_011054;ENSG00000151882;ENSG00000136244;ENSG00000121966;ENSG00000204252	K04466+K05513+K05405+K04189+K06752
Organismal Systems	Nervous system	Retrograde endocannabinoid signaling	4	107	0.977645	1	ko04723	ENSG00000167083;ENSG00000172354;ENSG00000127920;ENSG00000102287	K04549+K04537+K04546+K05185
Metabolism	Carbohydrate metabolism	Pyruvate metabolism	1	45	0.977674	1	ko00620	ENSG00000166796	K00016
Human Diseases	Infectious diseases	Chagas disease (American trypanosomiasis)	6	145	0.980498	1	ko05142	ENSG00000169429;ENSG00000136244;ENSG00000106366;ENSG00000100906;ENSG00000177606;ENSG00000232810	K10030+K05405+K03982+K04734+K04448+K03156
Organismal Systems	Endocrine system	Melanogenesis	4	111	0.982445	1	ko04916	ENSG00000174775;ENSG00000078401;ENSG00000126934;ENSG00000143816	K02833+K16366+K04369+K01064
Organismal Systems	Excretory system	Vasopressin-regulated water reabsorption	1	48	0.982686	1	ko04962	ENSG00000165272	K09876
Organismal Systems	Endocrine system	Insulin secretion	3	93	0.983727	1	ko04911	ENSG00000117394;ENSG00000128272;ENSG00000137731	K07299+K04374+K01538
Environmental Information Processing	Signal transduction	Jak-STAT signaling pathway	8	185	0.985603	1	ko04630	ENSG00000136244;ENSG00000136997;ENSG00000112576;ENSG00000170581;ENSG00000128342;ENSG00000108342;ENSG00000164400;ENSG00000175505	K05405+K04377+K10152+K11221+K05419+K05423+K05427+K05421
Environmental Information Processing	Signal transduction	Calcium signaling pathway	9	202	0.985801	1	ko04020	ENSG00000128271;ENSG00000176170;ENSG00000182500;ENSG00000137825;ENSG00000169252;ENSG00000120899;ENSG00000058668;ENSG00000101470;ENSG00000101306	K04266+K04718+K16056+K00911+K04142+K05871+K05850+K12042+K00907
Metabolism	Lipid metabolism	Glycerophospholipid metabolism	4	116	0.987082	1	ko00564	ENSG00000168970;ENSG00000132793;ENSG00000141934;ENSG00000077044	K16342+K15728+K01080+K00901
Human Diseases	Infectious diseases	Leishmaniasis	7	171	0.987715	1	ko05140	ENSG00000104825;ENSG00000100906;ENSG00000177606;ENSG00000204252;ENSG00000232810;ENSG00000169896;ENSG00000051523	K02581+K04734+K04448+K06752+K03156+K06461+K08009
Human Diseases	Cardiovascular diseases	Hypertrophic cardiomyopathy (HCM)	4	117	0.987857	1	ko05410	ENSG00000136244;ENSG00000198467;ENSG00000078401;ENSG00000232810	K05405+K10374+K16366+K03156
Human Diseases	Infectious diseases	Influenza A	16	318	0.988119	1	ko05164	ENSG00000173110;ENSG00000169429;ENSG00000088888;ENSG00000136244;ENSG00000162231;ENSG00000104825;ENSG00000170581;ENSG00000010438;ENSG00000100906;ENSG00000132661;ENSG00000126934;ENSG00000177606;ENSG00000204252;ENSG00000232810;ENSG00000204389;ENSG00000204389	K03283+K10030+K12648+K05405+K14284+K02581+K11221+K01312+K04734+K14285+K04369+K04448+K06752+K03156+K03283+K03283
Human Diseases	Immune diseases	Inflammatiory bowel disease (IBD)	6	155	0.988711	1	ko05321	ENSG00000136244;ENSG00000069667;ENSG00000177606;ENSG00000204252;ENSG00000112116;ENSG00000232810	K05405+K08532+K04448+K06752+K05494+K03156
Organismal Systems	Endocrine system	Aldosterone synthesis and secretion	3	100	0.989792	1	ko04925	ENSG00000182500;ENSG00000128272;ENSG00000123358	K16056+K04374+K04465
Metabolism	Carbohydrate metabolism	Inositol phosphate metabolism	2	82	0.992013	1	ko00562	ENSG00000168918;ENSG00000137825	K03084+K00911
Cellular Processes	Cellular commiunity	Tight junction	6	165	0.993583	1	ko04530	XLOC_004320;ENSG00000174775;ENSG00000184697;ENSG00000164403;ENSG00000177300;ENSG00000143375	K05699+K02833+K06087+K18625+K06087+K06102
Human Diseases	Cancers	Basal cell carcinoma	1	60	0.993744	1	ko05217	ENSG00000143816	K01064
Genetic Information Processing	Translation	Aminoacyl-tRNA biosynthesis	1	60	0.993744	1	ko00970	ENSG00000162396	K01881
Organismal Systems	Digestive system	Pancreatic secretion	3	108	0.994069	1	ko04972	ENSG00000010438;ENSG00000058668;ENSG00000137731	K01312+K05850+K01538
Human Diseases	Immune diseases	Primary immunodeficiency	2	87	0.9945	1	ko05340	ENSG00000182500;ENSG00000064490	K16056+K08062
Organismal Systems	Endocrine system	Regulation of lipolysis in adipocyte	1	62	0.994721	1	ko04923	ENSG00000169252	K04142
Environmental Information Processing	Membrane transport	ABC transporters	1	62	0.994721	1	ko02010	ENSG00000165029	K05641
Cellular Processes	Transport and catabolism	Lysosome	5	151	0.995137	1	ko04142	ENSG00000103174;ENSG00000117410;ENSG00000135404;ENSG00000129354;ENSG00000175416	K01125+K03661+K06497+K12393+K04645
Organismal Systems	Digestive system	Gastric acid secretion	2	91	0.995927	1	ko04971	ENSG00000101306;ENSG00000159197	K00907+K04896
Organismal Systems	Sensory system	Inflammatory mediator regulation of TRP channels	3	115	0.996341	1	ko04750	ENSG00000168970;ENSG00000104321;ENSG00000171522	K16342+K04984+K04261
Human Diseases	Infectious diseases	Toxoplasmosis	10	247	0.996502	1	ko05145	ENSG00000173110;ENSG00000002330;ENSG00000104825;ENSG00000100906;ENSG00000204252;ENSG00000023445;ENSG00000232810;ENSG00000012779;ENSG00000204389;ENSG00000204389	K03283+K02158+K02581+K04734+K06752+K16060+K03156+K00461+K03283+K03283
Environmental Information Processing	Signal transduction	Phosphatidylinositol signaling system	3	116	0.996587	1	ko04070	ENSG00000168918;ENSG00000137825;ENSG00000077044	K03084+K00911+K00901
Environmental Information Processing	Signaling molecules and interaction	Neuroactive ligand-receptor interaction	15	332	0.996732	1	ko04080	ENSG00000128271;ENSG00000139574;ENSG00000182687;ENSG00000178623;ENSG00000204681;ENSG00000166863;ENSG00000100300;ENSG00000169252;ENSG00000123901;ENSG00000010438;ENSG00000171522;ENSG00000241563;ENSG00000127129;ENSG00000102287;ENSG00000129749	K04266+K05247+K04231+K04276+K04615+K05240+K05770+K04142+K04210+K01312+K04261+K05238+K16367+K05185+K04811
Human Diseases	Infectious diseases	Herpes simplex infection	17	365	0.996827	1	ko05168	ENSG00000056558;ENSG00000197780;ENSG00000127191;ENSG00000088888;ENSG00000136244;ENSG00000162231;ENSG00000104529;ENSG00000126759;ENSG00000099804;ENSG00000104825;ENSG00000183684;ENSG00000170581;ENSG00000100906;ENSG00000177606;ENSG00000204252;ENSG00000232810;ENSG00000162227	K03172+K03127+K03173+K12648+K05405+K14284+K15410+K15412+K02207+K02581+K12881+K11221+K04734+K04448+K06752+K03156+K03131
Organismal Systems	Circulatory system	Adrenergic signaling in cardiomyocytes	6	181	0.997487	1	ko04261	ENSG00000198336;ENSG00000198467;ENSG00000128272;ENSG00000169252;ENSG00000058668;ENSG00000137731	K12750+K10374+K04374+K04142+K05850+K01538
Human Diseases	Cancers	Proteoglycans in cancer	9	236	0.997507	1	ko05205	ENSG00000112715;ENSG00000174775;ENSG00000168101;ENSG00000136997;ENSG00000137801;ENSG00000135404;ENSG00000126934;ENSG00000143816;ENSG00000232810	K05448+K02833+K16867+K04377+K16857+K06497+K04369+K01064+K03156
Organismal Systems	Nervous system	Dopaminergic synapse	4	147	0.998244	1	ko04728	ENSG00000167083;ENSG00000128272;ENSG00000172354;ENSG00000127920	K04549+K04374+K04537+K04546
Human Diseases	Infectious diseases	Tuberculosis	12	296	0.998337	1	ko05152	ENSG00000002330;ENSG00000136244;ENSG00000176170;ENSG00000102879;ENSG00000173846;ENSG00000170458;ENSG00000117410;ENSG00000087088;ENSG00000204252;ENSG00000064490;ENSG00000232810;ENSG00000169896	K02158+K05405+K04718+K13882+K08862+K04391+K03661+K02159+K06752+K08062+K03156+K06461
Human Diseases	Infectious diseases	Staphylococcus aureus infection	5	176	0.998987	1	ko05150	ENSG00000186395;ENSG00000197766;ENSG00000009724;ENSG00000204252;ENSG00000169896	K07604+K01334+K03993+K06752+K06461
Organismal Systems	Sensory system	Taste transduction	1	82	0.999036	1	ko04742	ENSG00000127366	K08474
Human Diseases	Immune diseases	Asthma	2	110	0.999043	1	ko05310	ENSG00000204252;ENSG00000232810	K06752+K03156
Human Diseases	Cardiovascular diseases	Dilated cardiomyopathy (DCM)	2	121	0.999592	1	ko05414	ENSG00000198467;ENSG00000232810	K10374+K03156
Cellular Processes	Transport and catabolism	Phagosome	12	332	0.999749	1	ko04145	XLOC_020908;ENSG00000258947;ENSG00000183785;ENSG00000106803;ENSG00000102879;ENSG00000170458;ENSG00000137801;ENSG00000117410;ENSG00000204252;ENSG00000169896;ENSG00000113732;ENSG00000051523	K06751+K07375+K07374+K09481+K13882+K04391+K16857+K03661+K06752+K06461+K02153+K08009
Organismal Systems	Immune system	Antigen processing and presentation	9	282	0.999815	1	ko04612	XLOC_020908;ENSG00000173110;ENSG00000100911;ENSG00000204252;ENSG00000064490;ENSG00000232810;ENSG00000204389;ENSG00000204389;ENSG00000216490	K06751+K03283+K06697+K06752+K08062+K03156+K03283+K03283+K08059
Environmental Information Processing	Signaling molecules and interaction	Cell adhesion molecules (CAMs)	8	270	0.999881	1	ko04514	XLOC_020908;ENSG00000184697;ENSG00000120217;ENSG00000149564;ENSG00000177300;ENSG00000204252;ENSG00000169896;ENSG00000169760	K06751+K06087+K06745+K06787+K06087+K06752+K06461+K07378
Organismal Systems	Immune system	Natural killer cell mediated cytotoxicity	8	271	0.999888	1	ko04650	XLOC_020908;ENSG00000174775;ENSG00000169750;ENSG00000120899;ENSG00000087266;ENSG00000126934;ENSG00000232810;ENSG00000164400	K06751+K02833+K07861+K05871+K07984+K04369+K03156+K05427
Human Diseases	Immune diseases	Graft-versus-host disease	3	179	0.999965	1	ko05332	ENSG00000136244;ENSG00000204252;ENSG00000232810	K05405+K06752+K03156
Human Diseases	Immune diseases	Allograft rejection	2	159	0.99998	1	ko05330	ENSG00000204252;ENSG00000232810	K06752+K03156
Human Diseases	Endocrine and metabolic diseases	Type I diabetes mellitus	2	168	0.99999	1	ko04940	ENSG00000204252;ENSG00000232810	K06752+K03156
Human Diseases	Cardiovascular diseases	Viral myocarditis	2	186	0.999998	1	ko05416	ENSG00000169750;ENSG00000204252	K07861+K06752
Human Diseases	Immune diseases	Autoimmune thyroid disease	1	167	0.999999	1	ko05320	ENSG00000204252	K06752
Organismal Systems	Sensory system	Olfactory transduction	1	507	1	1	ko04740	ENSG00000243896	K04257
