# Supplementary material for: Integrated transcriptomic and proteomic profiling reveals the key molecular signatures of brain endothelial reperfusion injury
Source: Research Square preprint supplement (doi:10.21203/rs.3.rs-2216319/v1), 2022-11-02
Supplement: Supplementary file 2 [file 61831983b05b7ca17aba90e2.xlsx]

## Sheet: OGD-R vs. OGD
Accession	Gene Name	Majority protein IDs	Fasta headers	Peptides	Unique peptides	Sequence coverage [%]	Mol. weight [kDa]	OGD_R1	OGD_R2	OGD_R3	OGD1	OGD2	OGD3	P-value	log2(FC)	FC
A2RU49	HYKK	sp|A2RU49|HYKK_HUMAN	>sp|A2RU49|HYKK_HUMAN Hydroxylysine kinase OS=Homo sapiens OX=9606 GN=HYKK PE=1 SV=2	2	2	9.9	41.933	0	0	0	0	2.84276	2.90557	0.000119364	0	0
O00189	AP4M1	sp|O00189|AP4M1_HUMAN	>sp|O00189|AP4M1_HUMAN AP-4 complex subunit mu-1 OS=Homo sapiens OX=9606 GN=AP4M1 PE=1 SV=2	3	3	8.4	49.976	0	0	0	4.10086	0	4.17049	7.08638e-05	0	0
O00391	QSOX1	sp|O00391|QSOX1_HUMAN	>sp|O00391|QSOX1_HUMAN Sulfhydryl oxidase 1 OS=Homo sapiens OX=9606 GN=QSOX1 PE=1 SV=3	5	5	10	82.577	4.1894	4.33588	0	4.89638	4.9436	0	0.0134279	-0.657349	0.634042
O00461	GOLIM4	sp|O00461|GOLI4_HUMAN	>sp|O00461|GOLI4_HUMAN Golgi integral membrane protein 4 OS=Homo sapiens OX=9606 GN=GOLIM4 PE=1 SV=1	9	9	17.2	81.879	5.30643	5.83812	5.49551	6.48313	6.40454	6.31503	0.00633816	-0.854214	0.553167
O00481	BTN3A1	sp|O00481|BT3A1_HUMAN	>sp|O00481|BT3A1_HUMAN Butyrophilin subfamily 3 member A1 OS=Homo sapiens OX=9606 GN=BTN3A1 PE=1 SV=3	5	5	13.8	57.677	0	0	0	3.45632	3.18414	0	0.0016758	0	0
O00622	CCN1	sp|O00622|CCN1_HUMAN	>sp|O00622|CCN1_HUMAN CCN family member 1 OS=Homo sapiens OX=9606 GN=CCN1 PE=1 SV=1	14	14	42.8	42.026	7.09711	6.72564	6.75785	7.59971	7.82024	7.60457	0.00426476	-0.814643	0.568549
O00635	TRIM38	sp|O00635|TRI38_HUMAN	>sp|O00635|TRI38_HUMAN E3 ubiquitin-protein ligase TRIM38 OS=Homo sapiens OX=9606 GN=TRIM38 PE=1 SV=1	8	8	19.4	53.415	0	0	0	4.16869	0	5.12808	0.0104824	0	0
O14786	NRP1	sp|O14786|NRP1_HUMAN	>sp|O14786|NRP1_HUMAN Neuropilin-1 OS=Homo sapiens OX=9606 GN=NRP1 PE=1 SV=3	15	15	25.4	103.13	5.83103	6.1077	5.7648	6.66217	6.69153	6.59724	0.00231967	-0.749139	0.594959
O15015	ZNF646	sp|O15015|ZN646_HUMAN	>sp|O15015|ZN646_HUMAN Zinc finger protein 646 OS=Homo sapiens OX=9606 GN=ZNF646 PE=1 SV=2	2	2	2.6	200.82	0	0	0	2.87736	0	2.53	0.00410136	0	0
O15234	CASC3	sp|O15234|CASC3_HUMAN	>sp|O15234|CASC3_HUMAN Protein CASC3 OS=Homo sapiens OX=9606 GN=CASC3 PE=1 SV=2	6	6	11.9	76.277	0	0	0	4.1613	0	4.34012	0.000442171	0	0
O43439	CBFA2T2	sp|O43439|MTG8R_HUMAN	>sp|O43439|MTG8R_HUMAN Protein CBFA2T2 OS=Homo sapiens OX=9606 GN=CBFA2T2 PE=1 SV=1	5	5	12.3	67.132	0	0	0	2.42775	2.85399	2.92438	6.07904e-05	0	0
O43474	KLF4	sp|O43474|KLF4_HUMAN	>sp|O43474|KLF4_HUMAN Krueppel-like factor 4 OS=Homo sapiens OX=9606 GN=KLF4 PE=1 SV=3	2	2	7.8	54.67	2.72522	0	2.3402	0	0	0	0.00572798	inf	inf
O75027	ABCB7	sp|O75027|ABCB7_HUMAN	>sp|O75027|ABCB7_HUMAN ATP-binding cassette sub-family B member 7, mitochondrial OS=Homo sapiens OX=9606 GN=ABCB7 PE=1 SV=2	4	4	7	82.64	0	0	0	0	3.3421	3.55551	0.000955951	0	0
O75356	ENTPD5	sp|O75356|ENTP5_HUMAN	>sp|O75356|ENTP5_HUMAN Ectonucleoside triphosphate diphosphohydrolase 5 OS=Homo sapiens OX=9606 GN=ENTPD5 PE=1 SV=1	5	5	22.2	47.517	4.03039	3.69787	4.31191	0	0	0	2.26398e-05	inf	inf
O75380	NDUFS6	sp|O75380|NDUS6_HUMAN	>sp|O75380|NDUS6_HUMAN NADH dehydrogenase [ubiquinone] iron-sulfur protein 6, mitochondrial OS=Homo sapiens OX=9606 GN=NDUFS6 PE=1 SV=1	2	2	17.7	13.711	4.92325	5.61193	0	0	0	0	0.00424594	inf	inf
O75394	MRPL33	sp|O75394|RM33_HUMAN	>sp|O75394|RM33_HUMAN 39S ribosomal protein L33, mitochondrial OS=Homo sapiens OX=9606 GN=MRPL33 PE=1 SV=1	2	2	20	7.6191	0	0	0	0	3.4772	3.67635	0.000774158	0	0
O75531	BANF1	sp|O75531|BAF_HUMAN	>sp|O75531|BAF_HUMAN Barrier-to-autointegration factor OS=Homo sapiens OX=9606 GN=BANF1 PE=1 SV=1	7	7	73	10.058	9.59344	9.44706	9.9946	8.78764	9.32088	9.03367	0.0484672	0.630966	1.5486
O76061	STC2	sp|O76061|STC2_HUMAN	>sp|O76061|STC2_HUMAN Stanniocalcin-2 OS=Homo sapiens OX=9606 GN=STC2 PE=1 SV=1	3	3	21.9	33.248	4.52505	4.49887	4.13089	0	3.81499	3.54516	0.0352569	0.70486	1.62999
O95081	AGFG2	sp|O95081|AGFG2_HUMAN	>sp|O95081|AGFG2_HUMAN Arf-GAP domain and FG repeat-containing protein 2 OS=Homo sapiens OX=9606 GN=AGFG2 PE=1 SV=2	2	2	5.6	48.962	4.19987	4.25324	0	0	0	0	3.98658e-05	inf	inf
O95235	KIF20A	sp|O95235|KI20A_HUMAN	>sp|O95235|KI20A_HUMAN Kinesin-like protein KIF20A OS=Homo sapiens OX=9606 GN=KIF20A PE=1 SV=1	16	16	28.1	100.28	5.75281	5.42953	5.39269	5.15863	4.71149	4.83039	0.0237811	0.624835	1.54203
O95236	APOL3	sp|O95236|APOL3_HUMAN	>sp|O95236|APOL3_HUMAN Apolipoprotein L3 OS=Homo sapiens OX=9606 GN=APOL3 PE=1 SV=3	4	4	14.2	44.278	0	0	0	0	2.78735	3.08029	0.00248321	0	0
O95759	TBC1D8	sp|O95759|TBCD8_HUMAN	>sp|O95759|TBCD8_HUMAN TBC1 domain family member 8 OS=Homo sapiens OX=9606 GN=TBC1D8 PE=1 SV=3	6	5	8.9	130.83	3.62436	0	3.18083	0	0	0	0.00422099	inf	inf
O95873	C6orf47	sp|O95873|CF047_HUMAN	>sp|O95873|CF047_HUMAN Uncharacterized protein C6orf47 OS=Homo sapiens OX=9606 GN=C6orf47 PE=1 SV=2	2	2	11.6	31.71	0	0	0	2.19116	0	2.0467	0.0011599	0	0
P00167	CYB5A	sp|P00167|CYB5_HUMAN	>sp|P00167|CYB5_HUMAN Cytochrome b5 OS=Homo sapiens OX=9606 GN=CYB5A PE=1 SV=2	5	5	49.3	15.33	7.06181	7.39059	6.72192	7.8464	7.7802	7.57525	0.0321379	-0.675839	0.625968
P00519	ABL1	sp|P00519|ABL1_HUMAN	>sp|P00519|ABL1_HUMAN Tyrosine-protein kinase ABL1 OS=Homo sapiens OX=9606 GN=ABL1 PE=1 SV=4	5	4	8.2	122.87	3.8626	0	3.55951	0	0	0	0.00166342	inf	inf
P02462	COL4A1	sp|P02462|CO4A1_HUMAN	>sp|P02462|CO4A1_HUMAN Collagen alpha-1(IV) chain OS=Homo sapiens OX=9606 GN=COL4A1 PE=1 SV=4	3	2	2.9	160.61	0	0	0	0	4.61911	4.26278	0.00160561	0	0
P02533	KRT14	sp|P02533|K1C14_HUMAN	>sp|P02533|K1C14_HUMAN Keratin, type I cytoskeletal 14 OS=Homo sapiens OX=9606 GN=KRT14 PE=1 SV=4	14	5	33.1	51.561	5.63457	4.89231	5.4778	6.56641	6.00452	6.56483	0.0236076	-1.04369	0.485084
P02679	FGG	sp|P02679|FIBG_HUMAN	>sp|P02679|FIBG_HUMAN Fibrinogen gamma chain OS=Homo sapiens OX=9606 GN=FGG PE=1 SV=3	5	5	19.2	51.511	0	3.80401	3.39636	0	0	0	0.00318999	inf	inf
P04066	FUCA1	sp|P04066|FUCO_HUMAN	>sp|P04066|FUCO_HUMAN Tissue alpha-L-fucosidase OS=Homo sapiens OX=9606 GN=FUCA1 PE=1 SV=4	3	3	10.9	53.688	3.96716	0	3.85805	0	0	0	0.00019436	inf	inf
P04114	APOB	sp|P04114|APOB_HUMAN	>sp|P04114|APOB_HUMAN Apolipoprotein B-100 OS=Homo sapiens OX=9606 GN=APOB PE=1 SV=2	6	5	1.6	515.6	5.65477	0	6.33705	0	0	0	0.00322138	inf	inf
P05067	APP	sp|P05067|A4_HUMAN	>sp|P05067|A4_HUMAN Amyloid-beta precursor protein OS=Homo sapiens OX=9606 GN=APP PE=1 SV=3	3	3	5.7	86.942	0	3.822	3.7979	0	0	0	1.00029e-05	inf	inf
P05106	ITGB3	sp|P05106|ITB3_HUMAN	>sp|P05106|ITB3_HUMAN Integrin beta-3 OS=Homo sapiens OX=9606 GN=ITGB3 PE=1 SV=2	8	8	18.1	87.057	3.48731	3.90815	3.52619	4.98262	4.32171	0	0.0437735	-1.01161	0.495991
P05121	SERPINE1	sp|P05121|PAI1_HUMAN	>sp|P05121|PAI1_HUMAN Plasminogen activator inhibitor 1 OS=Homo sapiens OX=9606 GN=SERPINE1 PE=1 SV=1	12	12	41	45.059	9.12929	8.9504	8.08374	7.3819	7.21218	7.08722	0.011043	1.49405	2.81678
P07996	THBS1	sp|P07996|TSP1_HUMAN	>sp|P07996|TSP1_HUMAN Thrombospondin-1 OS=Homo sapiens OX=9606 GN=THBS1 PE=1 SV=2	17	5	21.6	129.38	6.57332	6.75094	6.6093	5.47254	5.35172	5.22273	0.000136743	1.29553	2.45466
P08134	RHOC	sp|P08134|RHOC_HUMAN	>sp|P08134|RHOC_HUMAN Rho-related GTP-binding protein RhoC OS=Homo sapiens OX=9606 GN=RHOC PE=1 SV=1	10	2	59.6	22.006	0	0	0	0	7.86813	7.37983	0.00102398	0	0
P08779	KRT16	sp|P08779|K1C16_HUMAN	>sp|P08779|K1C16_HUMAN Keratin, type I cytoskeletal 16 OS=Homo sapiens OX=9606 GN=KRT16 PE=1 SV=4	10	3	25.6	51.267	0	0	0	3.54198	0	3.63402	0.00016446	0	0
P0CG13	CHTF8	sp|P0CG13|CTF8_HUMAN	>sp|P0CG13|CTF8_HUMAN Chromosome transmission fidelity protein 8 homolog OS=Homo sapiens OX=9606 GN=CHTF8 PE=1 SV=1	3	3	45.5	13.313	4.1209	0	3.64138	0	0	0	0.00379455	inf	inf
P10398	ARAF	sp|P10398|ARAF_HUMAN	>sp|P10398|ARAF_HUMAN Serine/threonine-protein kinase A-Raf OS=Homo sapiens OX=9606 GN=ARAF PE=1 SV=2	13	11	32	67.585	5.51392	3.74635	5.40852	0	0	0	0.00103104	inf	inf
P11388	TOP2A	sp|P11388|TOP2A_HUMAN	>sp|P11388|TOP2A_HUMAN DNA topoisomerase 2-alpha OS=Homo sapiens OX=9606 GN=TOP2A PE=1 SV=3	29	25	26.4	174.38	7.73908	7.97422	8.10745	7.30787	7.25363	7.46908	0.00897135	0.596726	1.51228
P13645	KRT10	sp|P13645|K1C10_HUMAN	>sp|P13645|K1C10_HUMAN Keratin, type I cytoskeletal 10 OS=Homo sapiens OX=9606 GN=KRT10 PE=1 SV=6	25	19	44.5	58.826	9.18337	8.83499	9.46063	10.5045	10.404	9.88104	0.0140569	-1.10351	0.465382
P14921	ETS1	sp|P14921|ETS1_HUMAN	>sp|P14921|ETS1_HUMAN Protein C-ets-1 OS=Homo sapiens OX=9606 GN=ETS1 PE=1 SV=1	5	5	16.8	50.407	3.98938	4.24519	3.97462	0	0	0	1.29776e-06	inf	inf
P15559	NQO1	sp|P15559|NQO1_HUMAN	>sp|P15559|NQO1_HUMAN NAD(P)H dehydrogenase [quinone] 1 OS=Homo sapiens OX=9606 GN=NQO1 PE=1 SV=1	9	9	33.2	30.867	9.38444	9.17907	9.1053	8.32891	8.25147	8.17653	0.000504331	0.970634	1.9597
P16435	POR	sp|P16435|NCPR_HUMAN	>sp|P16435|NCPR_HUMAN NADPH--cytochrome P450 reductase OS=Homo sapiens OX=9606 GN=POR PE=1 SV=2	6	6	16.7	76.689	0	4.50978	4.51246	3.6641	0	3.55876	0.00341177	0.89969	1.86567
P17275	JUNB	sp|P17275|JUNB_HUMAN	>sp|P17275|JUNB_HUMAN Transcription factor jun-B OS=Homo sapiens OX=9606 GN=JUNB PE=1 SV=1	8	8	45.8	35.879	6.86047	6.74115	6.78035	5.54936	5.29158	5.51463	0.000108113	1.34213	2.53526
P22736	NR4A1	sp|P22736|NR4A1_HUMAN	>sp|P22736|NR4A1_HUMAN Nuclear receptor subfamily 4 group A member 1 OS=Homo sapiens OX=9606 GN=NR4A1 PE=1 SV=1	2	2	4.8	64.463	2.93091	0	3.58732	0	0	0	0.00998959	inf	inf
P25963	NFKBIA	sp|P25963|IKBA_HUMAN	>sp|P25963|IKBA_HUMAN NF-kappa-B inhibitor alpha OS=Homo sapiens OX=9606 GN=NFKBIA PE=1 SV=1	4	4	19.9	35.609	3.03213	0	2.64606	0	0	0	0.00459114	inf	inf
P28562	DUSP1	sp|P28562|DUS1_HUMAN	>sp|P28562|DUS1_HUMAN Dual specificity protein phosphatase 1 OS=Homo sapiens OX=9606 GN=DUSP1 PE=1 SV=3	5	5	19.1	39.297	2.98636	0	3.57433	0	0	0	0.00793611	inf	inf
P33897	ABCD1	sp|P33897|ABCD1_HUMAN	>sp|P33897|ABCD1_HUMAN ATP-binding cassette sub-family D member 1 OS=Homo sapiens OX=9606 GN=ABCD1 PE=1 SV=2	2	2	4.4	82.936	0	0	0	1.98655	1.86787	0	0.000946734	0	0
P33908	MAN1A1	sp|P33908|MA1A1_HUMAN	>sp|P33908|MA1A1_HUMAN Mannosyl-oligosaccharide 1,2-alpha-mannosidase IA OS=Homo sapiens OX=9606 GN=MAN1A1 PE=1 SV=3	4	4	10.3	72.968	0	0	0	3.61722	3.84412	3.90737	1.74545e-06	0	0
P34947	GRK5	sp|P34947|GRK5_HUMAN	>sp|P34947|GRK5_HUMAN G protein-coupled receptor kinase 5 OS=Homo sapiens OX=9606 GN=GRK5 PE=1 SV=1	2	2	5.1	67.786	1.3732	0	1.51586	0	0	0	0.00242976	inf	inf
P48723	HSPA13	sp|P48723|HSP13_HUMAN	>sp|P48723|HSP13_HUMAN Heat shock 70 kDa protein 13 OS=Homo sapiens OX=9606 GN=HSPA13 PE=1 SV=1	7	7	19.5	51.927	4.68905	4.75166	4.38495	5.27975	5.12011	5.22974	0.00803464	-0.601312	0.659154
P49427	CDC34	sp|P49427|UB2R1_HUMAN	>sp|P49427|UB2R1_HUMAN Ubiquitin-conjugating enzyme E2 R1 OS=Homo sapiens OX=9606 GN=CDC34 PE=1 SV=2	2	2	20.3	26.736	0	0	0	0	4.64255	4.5646	7.1677e-05	0	0
P49590	HARS2	sp|P49590|SYHM_HUMAN	>sp|P49590|SYHM_HUMAN Probable histidine--tRNA ligase, mitochondrial OS=Homo sapiens OX=9606 GN=HARS2 PE=1 SV=1	12	6	26.9	56.888	3.78072	0	4.07703	0	0	0	0.00141898	inf	inf
P49716	CEBPD	sp|P49716|CEBPD_HUMAN	>sp|P49716|CEBPD_HUMAN CCAAT/enhancer-binding protein delta OS=Homo sapiens OX=9606 GN=CEBPD PE=1 SV=2	4	4	26.4	28.467	6.7955	6.83102	6.87105	6.15932	6.18941	6.38016	0.00124461	0.589558	1.50479
P51159	RAB27A	sp|P51159|RB27A_HUMAN	>sp|P51159|RB27A_HUMAN Ras-related protein Rab-27A OS=Homo sapiens OX=9606 GN=RAB27A PE=1 SV=3	7	7	33.9	24.868	0	0	0	0	4.21755	4.21867	1.76583e-08	0	0
P51808	DYNLT3	sp|P51808|DYLT3_HUMAN	>sp|P51808|DYLT3_HUMAN Dynein light chain Tctex-type 3 OS=Homo sapiens OX=9606 GN=DYNLT3 PE=1 SV=1	3	3	64.7	13.062	4.12932	0	6.10059	0	0	0	0.0351839	inf	inf
P53671	LIMK2	sp|P53671|LIMK2_HUMAN	>sp|P53671|LIMK2_HUMAN LIM domain kinase 2 OS=Homo sapiens OX=9606 GN=LIMK2 PE=1 SV=1	5	5	14.6	72.231	0	1.33474	1.73194	0	0	0	0.016365	inf	inf
P55789	GFER	sp|P55789|ALR_HUMAN	>sp|P55789|ALR_HUMAN FAD-linked sulfhydryl oxidase ALR OS=Homo sapiens OX=9606 GN=GFER PE=1 SV=2	3	3	20.5	23.449	0	3.90023	4.28857	0	0	0	0.00224148	inf	inf
P56199	ITGA1	sp|P56199|ITA1_HUMAN	>sp|P56199|ITA1_HUMAN Integrin alpha-1 OS=Homo sapiens OX=9606 GN=ITGA1 PE=1 SV=2	6	6	6.3	130.85	0	0	0	0	3.18022	3.21247	2.54504e-05	0	0
P56270	MAZ	sp|P56270|MAZ_HUMAN	>sp|P56270|MAZ_HUMAN Myc-associated zinc finger protein OS=Homo sapiens OX=9606 GN=MAZ PE=1 SV=1	4	4	11.5	48.607	0	0	0	5.39992	5.1638	0	0.000499272	0	0
P57723	PCBP4	sp|P57723|PCBP4_HUMAN	>sp|P57723|PCBP4_HUMAN Poly(rC)-binding protein 4 OS=Homo sapiens OX=9606 GN=PCBP4 PE=2 SV=1	4	4	18.1	41.481	0	0	0	0	2.53674	3.19392	0.0128973	0	0
P61587	RND3	sp|P61587|RND3_HUMAN	>sp|P61587|RND3_HUMAN Rho-related GTP-binding protein RhoE OS=Homo sapiens OX=9606 GN=RND3 PE=1 SV=1	5	5	29.1	27.368	5.59055	6.06828	6.37455	4.44888	4.25614	4.55805	0.00288857	1.5901	3.0107
P62875	POLR2L	sp|P62875|RPAB5_HUMAN	>sp|P62875|RPAB5_HUMAN DNA-directed RNA polymerases I, II, and III subunit RPABC5 OS=Homo sapiens OX=9606 GN=POLR2L PE=1 SV=1	2	2	29.9	7.645	0	0	0	5.70976	0	6.21941	0.00182023	0	0
P98160	HSPG2	sp|P98160|PGBM_HUMAN	>sp|P98160|PGBM_HUMAN Basement membrane-specific heparan sulfate proteoglycan core protein OS=Homo sapiens OX=9606 GN=HSPG2 PE=1 SV=4	4	4	1.4	468.83	0	0	0	1.92843	2.05073	1.74323	2.85121e-05	0	0
P98174	FGD1	sp|P98174|FGD1_HUMAN	>sp|P98174|FGD1_HUMAN FYVE, RhoGEF and PH domain-containing protein 1 OS=Homo sapiens OX=9606 GN=FGD1 PE=1 SV=2	5	5	8.8	106.56	2.50629	0	2.43098	0	0	0	0.000232545	inf	inf
Q02127	DHODH	sp|Q02127|PYRD_HUMAN	>sp|Q02127|PYRD_HUMAN Dihydroorotate dehydrogenase (quinone), mitochondrial OS=Homo sapiens OX=9606 GN=DHODH PE=1 SV=3	4	4	14.2	42.867	0	0	0	3.34843	2.53452	0	0.0186082	0	0
Q03113	GNA12	sp|Q03113|GNA12_HUMAN	>sp|Q03113|GNA12_HUMAN Guanine nucleotide-binding protein subunit alpha-12 OS=Homo sapiens OX=9606 GN=GNA12 PE=1 SV=4	6	6	19.7	44.279	0	0	0	0	4.68294	4.70695	6.54104e-06	0	0
Q05823	RNASEL	sp|Q05823|RN5A_HUMAN	>sp|Q05823|RN5A_HUMAN 2-5A-dependent ribonuclease OS=Homo sapiens OX=9606 GN=RNASEL PE=1 SV=2	2	2	3.6	83.532	0	0	0	2.20114	2.55015	2.70583	7.60724e-05	0	0
Q0VG06	FAAP100	sp|Q0VG06|FP100_HUMAN	>sp|Q0VG06|FP100_HUMAN Fanconi anemia core complex-associated protein 100 OS=Homo sapiens OX=9606 GN=FAAP100 PE=1 SV=3	5	5	9.1	93.432	0	0	0	4.17161	3.93947	5.03426	0.000192777	0	0
Q12805	EFEMP1	sp|Q12805|FBLN3_HUMAN	>sp|Q12805|FBLN3_HUMAN EGF-containing fibulin-like extracellular matrix protein 1 OS=Homo sapiens OX=9606 GN=EFEMP1 PE=1 SV=2	11	11	34.1	54.64	5.84098	5.99976	5.81243	6.78563	7.2394	6.87135	0.00200902	-1.08107	0.472677
Q13216	ERCC8	sp|Q13216|ERCC8_HUMAN	>sp|Q13216|ERCC8_HUMAN DNA excision repair protein ERCC-8 OS=Homo sapiens OX=9606 GN=ERCC8 PE=1 SV=1	4	4	17.2	44.055	0	2.4362	2.77439	0	0	0	0.00418614	inf	inf
Q13433	SLC39A6	sp|Q13433|S39A6_HUMAN	>sp|Q13433|S39A6_HUMAN Zinc transporter ZIP6 OS=Homo sapiens OX=9606 GN=SLC39A6 PE=1 SV=3	2	2	4.2	85.046	0	0	0	0	3.34874	4.23394	0.0133559	0	0
Q13541	EIF4EBP1	sp|Q13541|4EBP1_HUMAN	>sp|Q13541|4EBP1_HUMAN Eukaryotic translation initiation factor 4E-binding protein 1 OS=Homo sapiens OX=9606 GN=EIF4EBP1 PE=1 SV=3	5	5	70.3	12.58	6.6707	6.77983	6.88823	7.58783	7.59864	7.56098	0.000229269	-0.802896	0.573197
Q13636	RAB31	sp|Q13636|RAB31_HUMAN	>sp|Q13636|RAB31_HUMAN Ras-related protein Rab-31 OS=Homo sapiens OX=9606 GN=RAB31 PE=1 SV=1	6	4	43.8	21.569	0	0	0	4.08171	0	3.78844	0.00138569	0	0
Q13683	ITGA7	sp|Q13683|ITA7_HUMAN	>sp|Q13683|ITA7_HUMAN Integrin alpha-7 OS=Homo sapiens OX=9606 GN=ITGA7 PE=1 SV=3	13	13	17.5	128.95	5.7069	5.72212	5.30317	6.20704	6.17881	6.28907	0.0101141	-0.647577	0.638352
Q13772	NCOA4	sp|Q13772|NCOA4_HUMAN	>sp|Q13772|NCOA4_HUMAN Nuclear receptor coactivator 4 OS=Homo sapiens OX=9606 GN=NCOA4 PE=1 SV=1	3	3	6.5	69.725	4.61563	4.08386	0	0	0	0	0.0037156	inf	inf
Q13950	RUNX2	sp|Q13950|RUNX2_HUMAN	>sp|Q13950|RUNX2_HUMAN Runt-related transcription factor 2 OS=Homo sapiens OX=9606 GN=RUNX2 PE=1 SV=2	3	3	7.9	56.647	0	0	0	3.5946	0	3.84781	0.00115548	0	0
Q14814	MEF2D	sp|Q14814|MEF2D_HUMAN	>sp|Q14814|MEF2D_HUMAN Myocyte-specific enhancer factor 2D OS=Homo sapiens OX=9606 GN=MEF2D PE=1 SV=1	3	2	9.8	55.937	0	3.89907	3.24999	0	0	0	0.00814276	inf	inf
Q149N8	SHPRH	sp|Q149N8|SHPRH_HUMAN	>sp|Q149N8|SHPRH_HUMAN E3 ubiquitin-protein ligase SHPRH OS=Homo sapiens OX=9606 GN=SHPRH PE=1 SV=2	6	6	5.2	193.08	0	0	0	2.17043	0	3.08736	0.0290931	0	0
Q15262	PTPRK	sp|Q15262|PTPRK_HUMAN	>sp|Q15262|PTPRK_HUMAN Receptor-type tyrosine-protein phosphatase kappa OS=Homo sapiens OX=9606 GN=PTPRK PE=1 SV=2	10	10	10.8	162.1	0	0	0	0	4.5273	4.87727	0.00138197	0	0
Q15653	NFKBIB	sp|Q15653|IKBB_HUMAN	>sp|Q15653|IKBB_HUMAN NF-kappa-B inhibitor beta OS=Homo sapiens OX=9606 GN=NFKBIB PE=1 SV=2	3	3	12.4	37.771	0	4.14813	4.58307	0	0	0	0.00247229	inf	inf
Q15831	STK11	sp|Q15831|STK11_HUMAN	>sp|Q15831|STK11_HUMAN Serine/threonine-protein kinase STK11 OS=Homo sapiens OX=9606 GN=STK11 PE=1 SV=1	3	3	11.5	48.635	0	4.70765	4.22786	0	0	0	0.00287074	inf	inf
Q16363	LAMA4	sp|Q16363|LAMA4_HUMAN	>sp|Q16363|LAMA4_HUMAN Laminin subunit alpha-4 OS=Homo sapiens OX=9606 GN=LAMA4 PE=1 SV=4	6	6	5.3	202.52	0	0	0	0	3.21307	3.30618	0.000203889	0	0
Q16649	NFIL3	sp|Q16649|NFIL3_HUMAN	>sp|Q16649|NFIL3_HUMAN Nuclear factor interleukin-3-regulated protein OS=Homo sapiens OX=9606 GN=NFIL3 PE=1 SV=2	5	5	20.8	51.471	4.14789	4.62656	4.25271	0	0	0	7.45967e-06	inf	inf
Q16739	UGCG	sp|Q16739|CEGT_HUMAN	>sp|Q16739|CEGT_HUMAN Ceramide glucosyltransferase OS=Homo sapiens OX=9606 GN=UGCG PE=1 SV=1	5	5	17.8	44.853	0	0	0	0	4.58563	4.55212	1.34483e-05	0	0
Q29983	MICA	sp|Q29983|MICA_HUMAN	>sp|Q29983|MICA_HUMAN MHC class I polypeptide-related sequence A OS=Homo sapiens OX=9606 GN=MICA PE=1 SV=1	2	2	6.5	42.915	0	0	0	4.8571	5.32978	0	0.00214613	0	0
Q2NKJ3	CTC1	sp|Q2NKJ3|CTC1_HUMAN	>sp|Q2NKJ3|CTC1_HUMAN CST complex subunit CTC1 OS=Homo sapiens OX=9606 GN=CTC1 PE=1 SV=2	5	5	5.4	134.61	2.75787	0	3.0094	0	3.45111	3.56481	0.0455556	-0.624323	0.648724
Q2VPB7	AP5B1	sp|Q2VPB7|AP5B1_HUMAN	>sp|Q2VPB7|AP5B1_HUMAN AP-5 complex subunit beta-1 OS=Homo sapiens OX=9606 GN=AP5B1 PE=1 SV=4	4	4	7.1	93.948	0	0	0	0	2.06156	2.30286	0.00304288	0	0
Q3KRA9	ALKBH6	sp|Q3KRA9|ALKB6_HUMAN	>sp|Q3KRA9|ALKB6_HUMAN Alpha-ketoglutarate-dependent dioxygenase alkB homolog 6 OS=Homo sapiens OX=9606 GN=ALKBH6 PE=1 SV=2	2	2	15.1	26.483	0	0	0	3.74467	4.25476	0	0.00404133	0	0
Q52LR7	EPC2	sp|Q52LR7|EPC2_HUMAN	>sp|Q52LR7|EPC2_HUMAN Enhancer of polycomb homolog 2 OS=Homo sapiens OX=9606 GN=EPC2 PE=1 SV=2	2	2	4.1	91.094	0	0	0	2.47975	0	1.61806	0.0414852	0	0
Q53EP0	FNDC3B	sp|Q53EP0|FND3B_HUMAN	>sp|Q53EP0|FND3B_HUMAN Fibronectin type III domain-containing protein 3B OS=Homo sapiens OX=9606 GN=FNDC3B PE=1 SV=2	5	5	6.7	132.89	0	0	0	4.7906	0	4.51736	0.000860664	0	0
Q56NI9	ESCO2	sp|Q56NI9|ESCO2_HUMAN	>sp|Q56NI9|ESCO2_HUMAN N-acetyltransferase ESCO2 OS=Homo sapiens OX=9606 GN=ESCO2 PE=1 SV=1	5	5	12.8	68.306	0	0	0	3.30583	3.28975	0	5.94637e-06	0	0
Q5HYI8	RABL3	sp|Q5HYI8|RABL3_HUMAN	>sp|Q5HYI8|RABL3_HUMAN Rab-like protein 3 OS=Homo sapiens OX=9606 GN=RABL3 PE=1 SV=1	5	5	30.9	26.422	0	6.42995	8.22023	0	0	0	0.014607	inf	inf
Q5ST30	VARS2	sp|Q5ST30|SYVM_HUMAN	>sp|Q5ST30|SYVM_HUMAN Valine--tRNA ligase, mitochondrial OS=Homo sapiens OX=9606 GN=VARS2 PE=1 SV=2	9	9	15.7	118.49	0	5.20132	5.07639	3.99162	3.68672	0	0.0156914	1.29968	2.46175
Q5TC84	OGFRL1	sp|Q5TC84|OGRL1_HUMAN	>sp|Q5TC84|OGRL1_HUMAN Opioid growth factor receptor-like protein 1 OS=Homo sapiens OX=9606 GN=OGFRL1 PE=2 SV=1	6	6	17.3	51.251	0	0	0	2.74374	2.65205	2.72596	6.93275e-08	0	0
Q5THK1	PRR14L	sp|Q5THK1|PR14L_HUMAN	>sp|Q5THK1|PR14L_HUMAN Protein PRR14L OS=Homo sapiens OX=9606 GN=PRR14L PE=1 SV=1	3	3	2.1	237.3	2.78562	3.86525	3.37731	0	0	0	0.00043085	inf	inf
Q5VT06	CEP350	sp|Q5VT06|CE350_HUMAN	>sp|Q5VT06|CE350_HUMAN Centrosome-associated protein 350 OS=Homo sapiens OX=9606 GN=CEP350 PE=1 SV=1	4	4	2.5	350.93	0	0	0	2.79293	0	2.02482	0.0244891	0	0
Q5XKP0	MICOS13	sp|Q5XKP0|MIC13_HUMAN	>sp|Q5XKP0|MIC13_HUMAN MICOS complex subunit MIC13 OS=Homo sapiens OX=9606 GN=MICOS13 PE=1 SV=1	2	2	44.1	13.087	5.26863	0	5.7765	0	0	0	0.0021076	inf	inf
Q66LE6	PPP2R2D	sp|Q66LE6|2ABD_HUMAN	>sp|Q66LE6|2ABD_HUMAN Serine/threonine-protein phosphatase 2A 55 kDa regulatory subunit B delta isoform OS=Homo sapiens OX=9606 GN=PPP2R2D PE=1 SV=1	7	4	30.7	52.042	0	0	0	4.59769	0	4.46821	0.000203911	0	0
Q6NXT4	SLC30A6	sp|Q6NXT4|ZNT6_HUMAN	>sp|Q6NXT4|ZNT6_HUMAN Zinc transporter 6 OS=Homo sapiens OX=9606 GN=SLC30A6 PE=1 SV=2	5	5	20.6	51.115	4.87476	5.04025	4.73073	5.62043	0	5.34258	0.0306024	-0.599595	0.659939
Q6P1L5	FAM117B	sp|Q6P1L5|F117B_HUMAN	>sp|Q6P1L5|F117B_HUMAN Protein FAM117B OS=Homo sapiens OX=9606 GN=FAM117B PE=1 SV=2	2	2	7.3	61.967	3.31362	0	2.96268	0	0	0	0.00311188	inf	inf
Q6PID6	TTC33	sp|Q6PID6|TTC33_HUMAN	>sp|Q6PID6|TTC33_HUMAN Tetratricopeptide repeat protein 33 OS=Homo sapiens OX=9606 GN=TTC33 PE=1 SV=2	3	3	23.7	29.411	3.8223	3.75542	0	0	0	0	7.78772e-05	inf	inf
Q6PII3	CCDC174	sp|Q6PII3|CC174_HUMAN	>sp|Q6PII3|CC174_HUMAN Coiled-coil domain-containing protein 174 OS=Homo sapiens OX=9606 GN=CCDC174 PE=1 SV=3	3	3	8.4	53.957	0	0	0	0	3.64315	3.61286	1.74252e-05	0	0
Q6ZN54	DEF8	sp|Q6ZN54|DEFI8_HUMAN	>sp|Q6ZN54|DEFI8_HUMAN Differentially expressed in FDCP 8 homolog OS=Homo sapiens OX=9606 GN=DEF8 PE=1 SV=2	4	4	12.9	58.71	0	3.11713	2.78978	0	0	0	0.0030571	inf	inf
Q70UQ0	IKBIP	sp|Q70UQ0|IKIP_HUMAN	>sp|Q70UQ0|IKIP_HUMAN Inhibitor of nuclear factor kappa-B kinase-interacting protein OS=Homo sapiens OX=9606 GN=IKBIP PE=1 SV=1	13	13	38	39.309	6.25869	6.28901	6.13753	7.73759	6.58547	7.22963	0.046868	-0.955818	0.515549
Q7L804	RAB11FIP2	sp|Q7L804|RFIP2_HUMAN	>sp|Q7L804|RFIP2_HUMAN Rab11 family-interacting protein 2 OS=Homo sapiens OX=9606 GN=RAB11FIP2 PE=1 SV=1	5	3	12.7	58.278	0	2.70472	3.47584	0	0	0	0.0152119	inf	inf
Q7Z333	SETX	sp|Q7Z333|SETX_HUMAN	>sp|Q7Z333|SETX_HUMAN Probable helicase senataxin OS=Homo sapiens OX=9606 GN=SETX PE=1 SV=4	3	3	1.9	302.88	0	2.22287	2.61594	0	0	0	0.00653397	inf	inf
Q7Z5Q1	CPEB2	sp|Q7Z5Q1|CPEB2_HUMAN	>sp|Q7Z5Q1|CPEB2_HUMAN Cytoplasmic polyadenylation element-binding protein 2 OS=Homo sapiens OX=9606 GN=CPEB2 PE=2 SV=3	3	2	10	64.943	0	2.65198	3.16617	0	0	0	0.00772004	inf	inf
Q7Z6K3	PTAR1	sp|Q7Z6K3|PTAR1_HUMAN	>sp|Q7Z6K3|PTAR1_HUMAN Protein prenyltransferase alpha subunit repeat-containing protein 1 OS=Homo sapiens OX=9606 GN=PTAR1 PE=1 SV=2	5	5	15.7	46.405	4.05515	3.43297	3.60556	0	4.44387	4.73878	0.0427277	-0.89343	0.538333
Q7Z7H8	MRPL10	sp|Q7Z7H8|RM10_HUMAN	>sp|Q7Z7H8|RM10_HUMAN 39S ribosomal protein L10, mitochondrial OS=Homo sapiens OX=9606 GN=MRPL10 PE=1 SV=3	3	3	20.7	29.282	0	0	0	4.59002	3.34982	3.81973	0.000410454	0	0
Q86TJ2	TADA2B	sp|Q86TJ2|TAD2B_HUMAN	>sp|Q86TJ2|TAD2B_HUMAN Transcriptional adapter 2-beta OS=Homo sapiens OX=9606 GN=TADA2B PE=1 SV=2	5	5	16.4	48.47	0	2.89318	2.82463	3.72886	3.61918	3.47775	0.00453745	-0.749692	0.594731
Q86UW9	DTX2	sp|Q86UW9|DTX2_HUMAN	>sp|Q86UW9|DTX2_HUMAN Probable E3 ubiquitin-protein ligase DTX2 OS=Homo sapiens OX=9606 GN=DTX2 PE=1 SV=3	5	5	16.1	67.246	0	0	0	3.02042	0	3.28573	0.00176531	0	0
Q86XJ1	GAS2L3	sp|Q86XJ1|GA2L3_HUMAN	>sp|Q86XJ1|GA2L3_HUMAN GAS2-like protein 3 OS=Homo sapiens OX=9606 GN=GAS2L3 PE=1 SV=1	2	2	4.6	75.213	1.53436	0	2.17173	0	0	0	0.028326	inf	inf
Q86YD1	PTOV1	sp|Q86YD1|PTOV1_HUMAN	>sp|Q86YD1|PTOV1_HUMAN Prostate tumor-overexpressed gene 1 protein OS=Homo sapiens OX=9606 GN=PTOV1 PE=1 SV=1	5	5	20.9	46.868	0	3.59715	3.76716	2.50943	2.2583	0	0.0133678	1.2983	2.45938
Q86YH6	PDSS2	sp|Q86YH6|DLP1_HUMAN	>sp|Q86YH6|DLP1_HUMAN Decaprenyl-diphosphate synthase subunit 2 OS=Homo sapiens OX=9606 GN=PDSS2 PE=1 SV=2	4	4	12.5	44.128	0	0	0	3.82998	3.9143	0	0.000118534	0	0
Q8IUZ5	PHYKPL	sp|Q8IUZ5|AT2L2_HUMAN	>sp|Q8IUZ5|AT2L2_HUMAN 5-phosphohydroxy-L-lysine phospho-lyase OS=Homo sapiens OX=9606 GN=PHYKPL PE=1 SV=1	4	4	10.2	49.71	3.2739	0	3.0946	0	2.64164	2.48382	0.0350008	0.621522	1.5385
Q8IVL5	P3H2	sp|Q8IVL5|P3H2_HUMAN	>sp|Q8IVL5|P3H2_HUMAN Prolyl 3-hydroxylase 2 OS=Homo sapiens OX=9606 GN=P3H2 PE=1 SV=1	7	7	17.9	80.984	0	3.8763	4.14731	4.77206	4.81956	4.61164	0.0113871	-0.722613	0.605999
Q8IWF6	DENND6A	sp|Q8IWF6|DEN6A_HUMAN	>sp|Q8IWF6|DEN6A_HUMAN Protein DENND6A OS=Homo sapiens OX=9606 GN=DENND6A PE=1 SV=1	2	2	3.9	69.574	2.14362	2.75573	0	0	0	0	0.0152532	inf	inf
Q8IY57	YAF2	sp|Q8IY57|YAF2_HUMAN	>sp|Q8IY57|YAF2_HUMAN YY1-associated factor 2 OS=Homo sapiens OX=9606 GN=YAF2 PE=1 SV=3	3	3	22.8	19.901	0	4.42561	5.22249	0	0	0	0.00675285	inf	inf
Q8IY95	TMEM192	sp|Q8IY95|TM192_HUMAN	>sp|Q8IY95|TM192_HUMAN Transmembrane protein 192 OS=Homo sapiens OX=9606 GN=TMEM192 PE=1 SV=1	2	2	10	30.922	0	0	0	4.02061	3.46709	0	0.00542036	0	0
Q8IZ52	CHPF	sp|Q8IZ52|CHSS2_HUMAN	>sp|Q8IZ52|CHSS2_HUMAN Chondroitin sulfate synthase 2 OS=Homo sapiens OX=9606 GN=CHPF PE=1 SV=2	3	3	5.4	85.466	0	0	0	3.5524	2.64931	0	0.0205532	0	0
Q8N2F6	ARMC10	sp|Q8N2F6|ARM10_HUMAN	>sp|Q8N2F6|ARM10_HUMAN Armadillo repeat-containing protein 10 OS=Homo sapiens OX=9606 GN=ARMC10 PE=1 SV=1	2	2	8.2	37.54	0	0	0	4.29728	3.67437	4.14114	2.72883e-05	0	0
Q8N4Q1	CHCHD4	sp|Q8N4Q1|MIA40_HUMAN	>sp|Q8N4Q1|MIA40_HUMAN Mitochondrial intermembrane space import and assembly protein 40 OS=Homo sapiens OX=9606 GN=CHCHD4 PE=1 SV=1	4	4	41.5	15.996	0	0	0	0	5.87399	5.25545	0.00307457	0	0
Q8N884	CGAS	sp|Q8N884|CGAS_HUMAN	>sp|Q8N884|CGAS_HUMAN Cyclic GMP-AMP synthase OS=Homo sapiens OX=9606 GN=CGAS PE=1 SV=2	4	4	10	58.814	0	0	0	3.36912	2.95791	0	0.00419746	0	0
Q8NB78	KDM1B	sp|Q8NB78|KDM1B_HUMAN	>sp|Q8NB78|KDM1B_HUMAN Lysine-specific histone demethylase 1B OS=Homo sapiens OX=9606 GN=KDM1B PE=1 SV=3	2	2	3.9	92.097	0	0	0	0	2.30612	2.75846	0.00788294	0	0
Q8NBP7	PCSK9	sp|Q8NBP7|PCSK9_HUMAN	>sp|Q8NBP7|PCSK9_HUMAN Proprotein convertase subtilisin/kexin type 9 OS=Homo sapiens OX=9606 GN=PCSK9 PE=1 SV=3	5	5	13.2	74.285	0	0	0	3.75239	3.47343	0	0.00148711	0	0
Q8NBZ0	INO80E	sp|Q8NBZ0|IN80E_HUMAN	>sp|Q8NBZ0|IN80E_HUMAN INO80 complex subunit E OS=Homo sapiens OX=9606 GN=INO80E PE=1 SV=1	3	3	22.1	26.478	0	0	0	4.83231	0	4.55784	0.000853247	0	0
Q8NCN4	RNF169	sp|Q8NCN4|RN169_HUMAN	>sp|Q8NCN4|RN169_HUMAN E3 ubiquitin-protein ligase RNF169 OS=Homo sapiens OX=9606 GN=RNF169 PE=1 SV=2	6	6	15.4	77.193	4.20722	4.11566	4.06609	3.31149	3.5004	3.55946	0.00140842	0.672538	1.59387
Q8ND90	PNMA1	sp|Q8ND90|PNMA1_HUMAN	>sp|Q8ND90|PNMA1_HUMAN Paraneoplastic antigen Ma1 OS=Homo sapiens OX=9606 GN=PNMA1 PE=1 SV=2	3	3	11.6	39.761	3.25456	3.40042	0	0	0	0	0.000480014	inf	inf
Q8NFG4	FLCN	sp|Q8NFG4|FLCN_HUMAN	>sp|Q8NFG4|FLCN_HUMAN Folliculin OS=Homo sapiens OX=9606 GN=FLCN PE=1 SV=1	8	8	21.2	64.473	5.64041	5.76908	5.53679	4.65475	5.32908	5.086	0.0398351	0.625483	1.54273
Q8TED1	GPX8	sp|Q8TED1|GPX8_HUMAN	>sp|Q8TED1|GPX8_HUMAN Probable glutathione peroxidase 8 OS=Homo sapiens OX=9606 GN=GPX8 PE=1 SV=2	6	6	32.5	23.881	3.86883	4.99906	0	0	0	0	0.0158584	inf	inf
Q8TEH3	DENND1A	sp|Q8TEH3|DEN1A_HUMAN	>sp|Q8TEH3|DEN1A_HUMAN DENN domain-containing protein 1A OS=Homo sapiens OX=9606 GN=DENND1A PE=1 SV=2	4	4	7.1	110.58	4.00284	3.7129	3.41861	0	0	0	2.52358e-05	inf	inf
Q8TEL6	TRPC4AP	sp|Q8TEL6|TP4AP_HUMAN	>sp|Q8TEL6|TP4AP_HUMAN Short transient receptor potential channel 4-associated protein OS=Homo sapiens OX=9606 GN=TRPC4AP PE=1 SV=2	3	3	5.4	90.851	2.51914	2.90808	2.14853	0	0	0	0.00032467	inf	inf
Q8WVZ9	KBTBD7	sp|Q8WVZ9|KBTB7_HUMAN	>sp|Q8WVZ9|KBTB7_HUMAN Kelch repeat and BTB domain-containing protein 7 OS=Homo sapiens OX=9606 GN=KBTBD7 PE=1 SV=1	2	2	4.7	77.163	2.7509	2.92299	3.66054	0	0	0	0.00036789	inf	inf
Q8WW59	SPRYD4	sp|Q8WW59|SPRY4_HUMAN	>sp|Q8WW59|SPRY4_HUMAN SPRY domain-containing protein 4 OS=Homo sapiens OX=9606 GN=SPRYD4 PE=1 SV=2	2	2	9.7	23.128	0	0	0	3.92358	3.64354	3.47967	9.1311e-06	0	0
Q92522	H1FX	sp|Q92522|H1X_HUMAN	>sp|Q92522|H1X_HUMAN Histone H1x OS=Homo sapiens OX=9606 GN=H1FX PE=1 SV=1	6	6	31.5	22.487	8.43726	8.98618	8.75391	7.71988	8.18794	7.82734	0.0187307	0.814065	1.75816
Q92791	P3H4	sp|Q92791|SC65_HUMAN	>sp|Q92791|SC65_HUMAN Endoplasmic reticulum protein SC65 OS=Homo sapiens OX=9606 GN=P3H4 PE=1 SV=1	6	6	17.2	50.381	4.30689	0	4.32648	4.95926	5.03032	4.74487	0.0127177	-0.594794	0.662139
Q92870	APBB2	sp|Q92870|APBB2_HUMAN	>sp|Q92870|APBB2_HUMAN Amyloid-beta A4 precursor protein-binding family B member 2 OS=Homo sapiens OX=9606 GN=APBB2 PE=1 SV=3	5	5	13.1	83.373	4.24159	0	5.19039	0	0	0	0.00996799	inf	inf
Q92896	GLG1	sp|Q92896|GSLG1_HUMAN	>sp|Q92896|GSLG1_HUMAN Golgi apparatus protein 1 OS=Homo sapiens OX=9606 GN=GLG1 PE=1 SV=2	27	27	35.4	134.55	6.41309	6.61015	5.62453	8.50734	8.32883	8.08533	0.00300077	-2.09124	0.234678
Q969N2	PIGT	sp|Q969N2|PIGT_HUMAN	>sp|Q969N2|PIGT_HUMAN GPI transamidase component PIG-T OS=Homo sapiens OX=9606 GN=PIGT PE=1 SV=1	5	5	12.6	65.699	4.62817	4.18349	4.24586	0	0	0	6.19937e-06	inf	inf
Q969Q5	RAB24	sp|Q969Q5|RAB24_HUMAN	>sp|Q969Q5|RAB24_HUMAN Ras-related protein Rab-24 OS=Homo sapiens OX=9606 GN=RAB24 PE=1 SV=1	5	5	29.6	23.124	0	4.68589	3.59052	0	0	0	0.0170692	inf	inf
Q969V5	MUL1	sp|Q969V5|MUL1_HUMAN	>sp|Q969V5|MUL1_HUMAN Mitochondrial ubiquitin ligase activator of NFKB 1 OS=Homo sapiens OX=9606 GN=MUL1 PE=1 SV=1	3	3	15.3	39.8	2.5682	3.03809	0	0	0	0	0.0069516	inf	inf
Q96AJ9	VTI1A	sp|Q96AJ9|VTI1A_HUMAN	>sp|Q96AJ9|VTI1A_HUMAN Vesicle transport through interaction with t-SNAREs homolog 1A OS=Homo sapiens OX=9606 GN=VTI1A PE=1 SV=2	3	3	24.4	25.217	0	0	0	3.29685	2.53708	0	0.0165409	0	0
Q96BD8	SKA1	sp|Q96BD8|SKA1_HUMAN	>sp|Q96BD8|SKA1_HUMAN Spindle and kinetochore-associated protein 1 OS=Homo sapiens OX=9606 GN=SKA1 PE=1 SV=1	3	3	13.7	29.484	0	4.29397	4.0296	0	0	0	0.00100724	inf	inf
Q96BK5	PINX1	sp|Q96BK5|PINX1_HUMAN	>sp|Q96BK5|PINX1_HUMAN PIN2/TERF1-interacting telomerase inhibitor 1 OS=Homo sapiens OX=9606 GN=PINX1 PE=1 SV=2	3	3	14.9	37.034	0	4.4014	4.84892	0	0	0	0.00233231	inf	inf
Q96EL2	MRPS24	sp|Q96EL2|RT24_HUMAN	>sp|Q96EL2|RT24_HUMAN 28S ribosomal protein S24, mitochondrial OS=Homo sapiens OX=9606 GN=MRPS24 PE=1 SV=1	6	6	50.9	19.015	4.9606	5.79472	4.7923	0	0	0	7.49372e-05	inf	inf
Q96EZ8	MCRS1	sp|Q96EZ8|MCRS1_HUMAN	>sp|Q96EZ8|MCRS1_HUMAN Microspherule protein 1 OS=Homo sapiens OX=9606 GN=MCRS1 PE=1 SV=1	4	4	12.6	51.803	0	0	0	3.39108	0	3.49694	0.00023613	0	0
Q96F07	CYFIP2	sp|Q96F07|CYFP2_HUMAN	>sp|Q96F07|CYFP2_HUMAN Cytoplasmic FMR1-interacting protein 2 OS=Homo sapiens OX=9606 GN=CYFIP2 PE=1 SV=2	15	3	14.2	148.4	0	5.59701	5.48565	0	0	0	0.000100945	inf	inf
Q96FQ6	S100A16	sp|Q96FQ6|S10AG_HUMAN	>sp|Q96FQ6|S10AG_HUMAN Protein S100-A16 OS=Homo sapiens OX=9606 GN=S100A16 PE=1 SV=1	8	8	76.7	11.801	7.43263	7.65593	7.72611	8.18639	8.5847	7.95956	0.0346478	-0.63866	0.642309
Q96JM2	ZNF462	sp|Q96JM2|ZN462_HUMAN	>sp|Q96JM2|ZN462_HUMAN Zinc finger protein 462 OS=Homo sapiens OX=9606 GN=ZNF462 PE=1 SV=3	3	3	1.6	284.68	0	0	0	2.43748	0	2.37763	0.000154462	0	0
Q96LW7	CARD19	sp|Q96LW7|CAR19_HUMAN	>sp|Q96LW7|CAR19_HUMAN Caspase recruitment domain-containing protein 19 OS=Homo sapiens OX=9606 GN=CARD19 PE=1 SV=1	2	2	8.3	25.589	0	0	0	3.22613	0	3.13833	0.000190266	0	0
Q96RD7	PANX1	sp|Q96RD7|PANX1_HUMAN	>sp|Q96RD7|PANX1_HUMAN Pannexin-1 OS=Homo sapiens OX=9606 GN=PANX1 PE=1 SV=4	3	3	11.7	48.05	4.31604	4.83381	0	0	0	0	0.00318682	inf	inf
Q96RQ1	ERGIC2	sp|Q96RQ1|ERGI2_HUMAN	>sp|Q96RQ1|ERGI2_HUMAN Endoplasmic reticulum-Golgi intermediate compartment protein 2 OS=Homo sapiens OX=9606 GN=ERGIC2 PE=1 SV=2	4	4	15.6	42.548	3.61117	3.44983	3.5056	4.80794	4.09382	4.10751	0.0276397	-0.814224	0.568714
Q96RT7	TUBGCP6	sp|Q96RT7|GCP6_HUMAN	>sp|Q96RT7|GCP6_HUMAN Gamma-tubulin complex component 6 OS=Homo sapiens OX=9606 GN=TUBGCP6 PE=1 SV=3	9	9	10.3	200.5	4.29171	0	4.0971	4.79195	0	4.95699	0.0334402	-0.680068	0.624136
Q99523	SORT1	sp|Q99523|SORT_HUMAN	>sp|Q99523|SORT_HUMAN Sortilin OS=Homo sapiens OX=9606 GN=SORT1 PE=1 SV=3	7	7	15.2	92.067	4.80633	5.0011	4.49061	5.34791	5.53724	5.17367	0.0321618	-0.586929	0.665759
Q99611	SEPHS2	sp|Q99611|SPS2_HUMAN	>sp|Q99611|SPS2_HUMAN Selenide, water dikinase 2 OS=Homo sapiens OX=9606 GN=SEPHS2 PE=1 SV=3	2	2	7.8	47.305	0	0	0	0	4.05534	3.06825	0.0186647	0	0
Q99638	RAD9A	sp|Q99638|RAD9A_HUMAN	>sp|Q99638|RAD9A_HUMAN Cell cycle checkpoint control protein RAD9A OS=Homo sapiens OX=9606 GN=RAD9A PE=1 SV=1	3	3	10.5	42.547	0	0	0	0	2.21407	2.47455	0.00307222	0	0
Q99719	SEPTIN5	sp|Q99719|SEPT5_HUMAN	>sp|Q99719|SEPT5_HUMAN Septin-5 OS=Homo sapiens OX=9606 GN=SEPTIN5 PE=1 SV=1	2	2	8.9	42.777	1.86117	0	1.96737	0	0	0	0.000768579	inf	inf
Q99758	ABCA3	sp|Q99758|ABCA3_HUMAN	>sp|Q99758|ABCA3_HUMAN ATP-binding cassette sub-family A member 3 OS=Homo sapiens OX=9606 GN=ABCA3 PE=1 SV=2	3	3	2.8	191.36	0	0	0	2.71309	2.20508	0	0.0105013	0	0
Q9BQQ3	GORASP1	sp|Q9BQQ3|GORS1_HUMAN	>sp|Q9BQQ3|GORS1_HUMAN Golgi reassembly-stacking protein 1 OS=Homo sapiens OX=9606 GN=GORASP1 PE=1 SV=3	3	3	14.3	46.482	0	0	0	4.28887	4.64908	0	0.00162023	0	0
Q9BRQ0	PYGO2	sp|Q9BRQ0|PYGO2_HUMAN	>sp|Q9BRQ0|PYGO2_HUMAN Pygopus homolog 2 OS=Homo sapiens OX=9606 GN=PYGO2 PE=1 SV=2	3	3	13.5	41.244	0	0	0	0	3.43334	3.01963	0.00408506	0	0
Q9BSR8	YIPF4	sp|Q9BSR8|YIPF4_HUMAN	>sp|Q9BSR8|YIPF4_HUMAN Protein YIPF4 OS=Homo sapiens OX=9606 GN=YIPF4 PE=1 SV=1	2	2	9	27.082	0	0	0	0	5.91507	6.13814	0.000342352	0	0
Q9BWG6	SCNM1	sp|Q9BWG6|SCNM1_HUMAN	>sp|Q9BWG6|SCNM1_HUMAN Sodium channel modifier 1 OS=Homo sapiens OX=9606 GN=SCNM1 PE=1 SV=1	5	5	31.3	25.949	0	0	0	0	1.62259	2.05352	0.013465	0	0
Q9BXK1	KLF16	sp|Q9BXK1|KLF16_HUMAN	>sp|Q9BXK1|KLF16_HUMAN Krueppel-like factor 16 OS=Homo sapiens OX=9606 GN=KLF16 PE=1 SV=1	3	3	21	25.43	5.40901	0	5.11187	0	0	0	0.000796708	inf	inf
Q9BZ67	FRMD8	sp|Q9BZ67|FRMD8_HUMAN	>sp|Q9BZ67|FRMD8_HUMAN FERM domain-containing protein 8 OS=Homo sapiens OX=9606 GN=FRMD8 PE=1 SV=1	4	4	13.1	51.217	0	0	0	3.75062	4.04058	0	0.00138217	0	0
Q9BZ95	NSD3	sp|Q9BZ95|NSD3_HUMAN	>sp|Q9BZ95|NSD3_HUMAN Histone-lysine N-methyltransferase NSD3 OS=Homo sapiens OX=9606 GN=NSD3 PE=1 SV=1	8	8	9.5	161.61	3.70864	4.63239	4.25254	0	0	0	9.71102e-05	inf	inf
Q9BZM5	ULBP2	sp|Q9BZM5|ULBP2_HUMAN	>sp|Q9BZM5|ULBP2_HUMAN UL16-binding protein 2 OS=Homo sapiens OX=9606 GN=ULBP2 PE=1 SV=1	3	3	15.9	27.368	0	0	0	4.12678	4.29094	0	0.000380113	0	0
Q9C086	INO80B	sp|Q9C086|IN80B_HUMAN	>sp|Q9C086|IN80B_HUMAN INO80 complex subunit B OS=Homo sapiens OX=9606 GN=INO80B PE=1 SV=2	2	2	7.9	38.637	3.17797	0	3.9128	0	0	0	0.0105697	inf	inf
Q9GZU1	MCOLN1	sp|Q9GZU1|MCLN1_HUMAN	>sp|Q9GZU1|MCLN1_HUMAN Mucolipin-1 OS=Homo sapiens OX=9606 GN=MCOLN1 PE=1 SV=1	3	3	5.5	65.022	0	3.86596	3.35061	0	0	0	0.00506091	inf	inf
Q9GZX9	TWSG1	sp|Q9GZX9|TWSG1_HUMAN	>sp|Q9GZX9|TWSG1_HUMAN Twisted gastrulation protein homolog 1 OS=Homo sapiens OX=9606 GN=TWSG1 PE=1 SV=1	3	3	26	25.017	5.03961	4.81107	5.20492	5.81517	5.68252	0	0.0182501	-0.730309	0.602775
Q9H082	RAB33B	sp|Q9H082|RB33B_HUMAN	>sp|Q9H082|RB33B_HUMAN Ras-related protein Rab-33B OS=Homo sapiens OX=9606 GN=RAB33B PE=1 SV=1	2	2	14.4	25.717	0	4.81816	4.43256	0	0	0	0.00173299	inf	inf
Q9H0J9	PARP12	sp|Q9H0J9|PAR12_HUMAN	>sp|Q9H0J9|PAR12_HUMAN Protein mono-ADP-ribosyltransferase PARP12 OS=Homo sapiens OX=9606 GN=PARP12 PE=1 SV=1	6	6	13	79.063	4.32266	4.5871	4.28249	0	0	0	1.33316e-06	inf	inf
Q9H211	CDT1	sp|Q9H211|CDT1_HUMAN	>sp|Q9H211|CDT1_HUMAN DNA replication factor Cdt1 OS=Homo sapiens OX=9606 GN=CDT1 PE=1 SV=3	3	3	10.1	60.39	0	3.68643	3.2293	0	0	0	0.00434076	inf	inf
Q9H3L0	MMADHC	sp|Q9H3L0|MMAD_HUMAN	>sp|Q9H3L0|MMAD_HUMAN Methylmalonic aciduria and homocystinuria type D protein, mitochondrial OS=Homo sapiens OX=9606 GN=MMADHC PE=1 SV=2	10	10	49	32.94	5.96389	5.32137	5.63836	0	0	0	6.9624e-06	inf	inf
Q9H672	ASB7	sp|Q9H672|ASB7_HUMAN	>sp|Q9H672|ASB7_HUMAN Ankyrin repeat and SOCS box protein 7 OS=Homo sapiens OX=9606 GN=ASB7 PE=1 SV=2	3	3	16.4	36.011	1.2107	0.915262	0	0	0	0	0.0187702	inf	inf
Q9H9Y4	GPN2	sp|Q9H9Y4|GPN2_HUMAN	>sp|Q9H9Y4|GPN2_HUMAN GPN-loop GTPase 2 OS=Homo sapiens OX=9606 GN=GPN2 PE=1 SV=2	3	3	12.3	34.56	0	0	0	3.76682	0	3.07631	0.010029	0	0
Q9HC52	CBX8	sp|Q9HC52|CBX8_HUMAN	>sp|Q9HC52|CBX8_HUMAN Chromobox protein homolog 8 OS=Homo sapiens OX=9606 GN=CBX8 PE=1 SV=3	4	4	17	43.395	0	0	0	3.87168	4.19476	0	0.00160028	0	0
Q9HC62	SENP2	sp|Q9HC62|SENP2_HUMAN	>sp|Q9HC62|SENP2_HUMAN Sentrin-specific protease 2 OS=Homo sapiens OX=9606 GN=SENP2 PE=1 SV=3	2	2	5.1	67.854	7.02589	6.50907	0	0	0	0	0.00145485	inf	inf
Q9NP84	TNFRSF12A	sp|Q9NP84|TNR12_HUMAN	>sp|Q9NP84|TNR12_HUMAN Tumor necrosis factor receptor superfamily member 12A OS=Homo sapiens OX=9606 GN=TNFRSF12A PE=1 SV=1	2	2	29.5	13.911	0	3.24283	2.9726	0	0	0	0.00188499	inf	inf
Q9NQV6	PRDM10	sp|Q9NQV6|PRD10_HUMAN	>sp|Q9NQV6|PRD10_HUMAN PR domain zinc finger protein 10 OS=Homo sapiens OX=9606 GN=PRDM10 PE=1 SV=3	3	3	3.9	130.13	0	0	0	2.77196	2.26164	0	0.0101227	0	0
Q9NRD1	FBXO6	sp|Q9NRD1|FBX6_HUMAN	>sp|Q9NRD1|FBX6_HUMAN F-box only protein 6 OS=Homo sapiens OX=9606 GN=FBXO6 PE=1 SV=1	2	2	9.9	33.932	0	0	0	0	3.53543	4.15118	0.00635591	0	0
Q9NUP1	BLOC1S4	sp|Q9NUP1|BL1S4_HUMAN	>sp|Q9NUP1|BL1S4_HUMAN Biogenesis of lysosome-related organelles complex 1 subunit 4 OS=Homo sapiens OX=9606 GN=BLOC1S4 PE=1 SV=1	4	4	35	23.351	5.1866	5.08675	0	0	0	0	9.44495e-05	inf	inf
Q9NVF7	FBXO28	sp|Q9NVF7|FBX28_HUMAN	>sp|Q9NVF7|FBX28_HUMAN F-box only protein 28 OS=Homo sapiens OX=9606 GN=FBXO28 PE=1 SV=1	4	4	18.8	41.149	0	0	0	0	3.38711	3.47394	0.00016013	0	0
Q9NWZ8	GEMIN8	sp|Q9NWZ8|GEMI8_HUMAN	>sp|Q9NWZ8|GEMI8_HUMAN Gem-associated protein 8 OS=Homo sapiens OX=9606 GN=GEMIN8 PE=1 SV=1	5	5	22.3	28.636	0	4.74629	4.72575	0	0	0	4.70404e-06	inf	inf
Q9NX74	DUS2	sp|Q9NX74|DUS2L_HUMAN	>sp|Q9NX74|DUS2L_HUMAN tRNA-dihydrouridine(20) synthase [NAD(P)+]-like OS=Homo sapiens OX=9606 GN=DUS2 PE=1 SV=1	6	6	15.4	55.05	0	3.83941	4.06919	0	0	0	0.000843081	inf	inf
Q9NXD2	MTMR10	sp|Q9NXD2|MTMRA_HUMAN	>sp|Q9NXD2|MTMRA_HUMAN Myotubularin-related protein 10 OS=Homo sapiens OX=9606 GN=MTMR10 PE=1 SV=3	7	7	13.3	88.272	3.57711	3.58746	3.4481	0	0	0	1.54537e-07	inf	inf
Q9P0P8	C6orf203	sp|Q9P0P8|CF203_HUMAN	>sp|Q9P0P8|CF203_HUMAN Uncharacterized protein C6orf203 OS=Homo sapiens OX=9606 GN=C6orf203 PE=1 SV=1	2	2	12.9	27.941	4.14761	4.70118	0	0	0	0	0.0038908	inf	inf
Q9P219	CCDC88C	sp|Q9P219|DAPLE_HUMAN	>sp|Q9P219|DAPLE_HUMAN Protein Daple OS=Homo sapiens OX=9606 GN=CCDC88C PE=1 SV=3	4	4	3.3	228.23	0	0	0	0	2.78864	2.87687	0.000242431	0	0
Q9P2L0	WDR35	sp|Q9P2L0|WDR35_HUMAN	>sp|Q9P2L0|WDR35_HUMAN WD repeat-containing protein 35 OS=Homo sapiens OX=9606 GN=WDR35 PE=1 SV=3	3	3	4.5	133.55	0	3.47051	3.68141	0	0	0	0.000868467	inf	inf
Q9UBU8	MORF4L1	sp|Q9UBU8|MO4L1_HUMAN	>sp|Q9UBU8|MO4L1_HUMAN Mortality factor 4-like protein 1 OS=Homo sapiens OX=9606 GN=MORF4L1 PE=1 SV=2	11	10	35.4	41.473	7.33432	7.2015	7.33744	6.74653	6.67091	6.5909	0.000608377	0.621643	1.53863
Q9UBZ4	APEX2	sp|Q9UBZ4|APEX2_HUMAN	>sp|Q9UBZ4|APEX2_HUMAN DNA-(apurinic or apyrimidinic site) lyase 2 OS=Homo sapiens OX=9606 GN=APEX2 PE=1 SV=1	2	2	6.2	57.4	3.55269	4.11228	3.13497	0	0	0	0.000220343	inf	inf
Q9UHG3	PCYOX1	sp|Q9UHG3|PCYOX_HUMAN	>sp|Q9UHG3|PCYOX_HUMAN Prenylcysteine oxidase 1 OS=Homo sapiens OX=9606 GN=PCYOX1 PE=1 SV=3	10	10	27.5	56.639	5.8865	5.67873	5.63816	6.83687	6.77237	6.52566	0.0013222	-0.977169	0.507975
Q9UIW2	PLXNA1	sp|Q9UIW2|PLXA1_HUMAN	>sp|Q9UIW2|PLXA1_HUMAN Plexin-A1 OS=Homo sapiens OX=9606 GN=PLXNA1 PE=1 SV=3	15	12	12.3	211.06	4.25264	4.57676	3.87707	5.14971	4.84159	4.84977	0.0346405	-0.711533	0.610671
Q9ULX9	MAFF	sp|Q9ULX9|MAFF_HUMAN	>sp|Q9ULX9|MAFF_HUMAN Transcription factor MafF OS=Homo sapiens OX=9606 GN=MAFF PE=1 SV=2	5	5	42.7	17.76	6.93742	7.1268	7.01567	6.17298	6.07194	5.92855	0.000416968	0.968803	1.95722
Q9UPW0	FOXJ3	sp|Q9UPW0|FOXJ3_HUMAN	>sp|Q9UPW0|FOXJ3_HUMAN Forkhead box protein J3 OS=Homo sapiens OX=9606 GN=FOXJ3 PE=1 SV=2	3	2	6.1	68.96	4.11928	0	4.16838	0	0	0	3.50975e-05	inf	inf
Q9Y289	SLC5A6	sp|Q9Y289|SC5A6_HUMAN	>sp|Q9Y289|SC5A6_HUMAN Sodium-dependent multivitamin transporter OS=Homo sapiens OX=9606 GN=SLC5A6 PE=2 SV=2	3	3	6.5	68.641	0	0	0	3.79391	3.7403	0	5.06434e-05	0	0
Q9Y3B1	PRELID3B	sp|Q9Y3B1|PLD3B_HUMAN	>sp|Q9Y3B1|PLD3B_HUMAN PRELI domain containing protein 3B OS=Homo sapiens OX=9606 GN=PRELID3B PE=1 SV=2	4	4	30.9	21.494	3.43724	3.55512	3.85967	0	0	0	8.71997e-06	inf	inf
Q9Y535	POLR3H	sp|Q9Y535|RPC8_HUMAN	>sp|Q9Y535|RPC8_HUMAN DNA-directed RNA polymerase III subunit RPC8 OS=Homo sapiens OX=9606 GN=POLR3H PE=1 SV=1	4	4	35.8	22.918	3.98135	3.2832	3.70108	0	0	0	5.57514e-05	inf	inf
Q9Y546	LRRC42	sp|Q9Y546|LRC42_HUMAN	>sp|Q9Y546|LRC42_HUMAN Leucine-rich repeat-containing protein 42 OS=Homo sapiens OX=9606 GN=LRRC42 PE=1 SV=1	6	6	17.1	48.571	0	0	0	4.29693	6.20903	0	0.0315646	0	0
Q9Y6J9	TAF6L	sp|Q9Y6J9|TAF6L_HUMAN	>sp|Q9Y6J9|TAF6L_HUMAN TAF6-like RNA polymerase II p300/CBP-associated factor-associated factor 65 kDa subunit 6L OS=Homo sapiens OX=9606 GN=TAF6L PE=1 SV=1	8	8	20.1	67.814	0	0	0	0	3.73943	4.34855	0.00562398	0	0
Q9Y6N1	COX11	sp|Q9Y6N1|COX11_HUMAN	>sp|Q9Y6N1|COX11_HUMAN Cytochrome c oxidase assembly protein COX11, mitochondrial OS=Homo sapiens OX=9606 GN=COX11 PE=1 SV=3	2	2	8.7	31.43	0	3.63834	2.62851	0	0	0	0.0249963	inf	inf
