# Supplementary material for: Integrated transcriptomic and proteomic profiling reveals the key molecular signatures of brain endothelial reperfusion injury
Source: Research Square preprint supplement (doi:10.21203/rs.3.rs-2216319/v1), 2022-11-02
Supplement: Supplementary file 3 [file 6a62ffafac940e769d2e378c.xlsx]

## Sheet: OGD vs. NC
id	NC_count	OGD_count	NC_fpkm	OGD_fpkm	log2(FC)	Pvalue	FDR	significant	Symbol	Description	KEGG_A_class	KEGG_B_class	Pathway	K_ID	GO Component	GO Function	GO Process
ENSG00000002016	41.6667	123.333	1.74333	7.03	1.57636	0.00126664	0.0186172	up	RAD52	RAD52 homolog (S. cerevisiae) [Source:HGNC Symbol;Acc:9824]	Genetic Information Processing	Replication and repair	ko03440//Homologous recombination	K10873	GO:0005575//cellular_component;GO:0044428//nuclear part;GO:0005634//nucleus;GO:0005623//cell;GO:0031981//nuclear lumen;GO:0044424//intracellular part;GO:0043231//intracellular membrane-bounded organelle;GO:0031974//membrane-enclosed lumen;GO:0070013//intracellular organelle lumen;GO:0044464//cell part;GO:0044422//organelle part;GO:0043226//organelle;GO:0044446//intracellular organelle part;GO:000…	GO:0005488//binding;GO:0003674//molecular_function;GO:0003676//nucleic acid binding;GO:1901363//heterocyclic compound binding;GO:0097159//organic cyclic compound binding;GO:0003677//DNA binding	GO:0006259//DNA metabolic process;GO:0050896//response to stimulus;GO:0044260//cellular macromolecule metabolic process;GO:0044085//cellular component biogenesis;GO:0071840//cellular component organization or biogenesis;GO:0016043//cellular component organization;GO:0044763//single-organism cellular process;GO:0071704//organic substance metabolic process;GO:0043933//macromolecular complex subunit…
ENSG00000002330	2463.63	547.66	169.707	56.4633	-2.09596	0.00036888	0.00937388	down	BAD	BCL2-associated agonist of cell death [Source:HGNC Symbol;Acc:936]	Organismal Systems;Cellular Processes;Environmental Information Processing;Human Diseases	Nervous system;Cellular commiunity;Cell growth and death;Infectious diseases;Cancers;Neurodegenerative diseases;Endocrine system;Signal transduction	ko05203//Viral carcinogenesis;ko05200//Pathways in cancer;ko04151//PI3K-Akt signaling pathway;ko05152//Tuberculosis;ko04014//Ras signaling pathway;ko04510//Focal adhesion;ko05145//Toxoplasmosis;ko04024//cAMP signaling pathway;ko05010//Alzheimer's disease;ko04022//cGMP - PKG signaling pathway;ko05161//Hepatitis B;ko05160//Hepatitis C;ko04910//Insulin signaling pathway;ko04919//Thyroid hormone sign…	K02158	GO:0044424//intracellular part;GO:0043226//organelle;GO:0005737//cytoplasm;GO:0005739//mitochondrion;GO:0005622//intracellular;GO:0005575//cellular_component;GO:0005623//cell;GO:0043229//intracellular organelle;GO:0044444//cytoplasmic part;GO:0043227//membrane-bounded organelle;GO:0005829//cytosol;GO:0043231//intracellular membrane-bounded organelle;GO:0044464//cell part	GO:0043167//ion binding;GO:0098772//molecular function regulator;GO:0003674//molecular_function;GO:0008289//lipid binding;GO:0030234//enzyme regulator activity;GO:0005488//binding;GO:0005515//protein binding;GO:0019899//enzyme binding	GO:0006950//response to stress;GO:0009987//cellular process;GO:0051716//cellular response to stimulus;GO:0008150//biological_process;GO:0007005//mitochondrion organization;GO:0061024//membrane organization;GO:0070271//protein complex biogenesis;GO:0065007//biological regulation;GO:0071840//cellular component organization or biogenesis;GO:0044238//primary metabolic process;GO:0022607//cellular com…
ENSG00000002586	5204	1948.33	243.013	122.653	-1.3732	0.00381206	0.0349302	down	CD99	-	Organismal Systems;Environmental Information Processing	Immune system;Signaling molecules and interaction	ko04514//Cell adhesion molecules (CAMs);ko04670//Leukocyte transendothelial migration	K06520	GO:0005622//intracellular;GO:0044464//cell part;GO:0005886//plasma membrane;GO:0044424//intracellular part;GO:0071944//cell periphery;GO:0016020//membrane;GO:0005737//cytoplasm;GO:0005623//cell;GO:0005575//cellular_component	-	GO:0022610//biological adhesion;GO:0008150//biological_process;GO:0007155//cell adhesion
ENSG00000004059	5178.33	1486	293.273	142.54	-1.7452	0.000966788	0.0160331	down	ARF5	ADP-ribosylation factor 5 [Source:HGNC Symbol;Acc:658]	Cellular Processes	Transport and catabolism	ko04144//Endocytosis	K07940	GO:0016020//membrane;GO:0005886//plasma membrane;GO:0044424//intracellular part;GO:0043229//intracellular organelle;GO:0043226//organelle;GO:0005634//nucleus;GO:0012505//endomembrane system;GO:0005737//cytoplasm;GO:0005794//Golgi apparatus;GO:0043227//membrane-bounded organelle;GO:0044464//cell part;GO:0005622//intracellular;GO:0005575//cellular_component;GO:0071944//cell periphery;GO:0044444//cy…	GO:0003674//molecular_function;GO:0017111//nucleoside-triphosphatase activity;GO:0004871//signal transducer activity;GO:0016817//hydrolase activity, acting on acid anhydrides;GO:0016462//pyrophosphatase activity;GO:0003824//catalytic activity;GO:0016787//hydrolase activity;GO:0043167//ion binding;GO:0005488//binding;GO:0016818//hydrolase activity, acting on acid anhydrides, in phosphorus-containi…	GO:0044700//single organism signaling;GO:0046700//heterocycle catabolic process;GO:1901360//organic cyclic compound metabolic process;GO:1901361//organic cyclic compound catabolic process;GO:0009056//catabolic process;GO:0044248//cellular catabolic process;GO:0044238//primary metabolic process;GO:0008150//biological_process;GO:0050896//response to stimulus;GO:0046483//heterocycle metabolic proces…
ENSG00000004779	1971.67	627	225.83	96.95	-1.61054	0.000281246	0.00841931	down	NDUFAB1	NADH dehydrogenase (ubiquinone) 1, alpha/beta subcomplex, 1, 8kDa [Source:HGNC Symbol;Acc:7694]	Metabolism;Human Diseases	Endocrine and metabolic diseases;Energy metabolism;Neurodegenerative diseases	ko05016//Huntington's disease;ko05010//Alzheimer's disease;ko04932//Non-alcoholic fatty liver disease (NAFLD);ko00190//Oxidative phosphorylation;ko05012//Parkinson's disease	K03955	GO:0043227//membrane-bounded organelle;GO:0005737//cytoplasm;GO:0044444//cytoplasmic part;GO:0005623//cell;GO:0005622//intracellular;GO:0044424//intracellular part;GO:0032991//macromolecular complex;GO:0005575//cellular_component;GO:0005739//mitochondrion;GO:0043226//organelle;GO:0043234//protein complex;GO:0043231//intracellular membrane-bounded organelle;GO:0044464//cell part;GO:0043229//intrac…	GO:0003674//molecular_function;GO:0016491//oxidoreductase activity;GO:0003824//catalytic activity;GO:0043167//ion binding;GO:0008289//lipid binding;GO:0005488//binding	GO:0006464//cellular protein modification process;GO:0044281//small molecule metabolic process;GO:0036211//protein modification process;GO:0044699//single-organism process;GO:0009987//cellular process;GO:0019538//protein metabolic process;GO:0044267//cellular protein metabolic process;GO:0006629//lipid metabolic process;GO:0043170//macromolecule metabolic process;GO:0043412//macromolecule modific…
ENSG00000005075	1114.13	291.747	75.3933	27.5	-1.87578	0.000455886	0.0105505	down	POLR2J	polymerase (RNA) II (DNA directed) polypeptide J, 13.3kDa [Source:HGNC Symbol;Acc:9197]	Genetic Information Processing;Metabolism;Human Diseases	Nucleotide metabolism;Infectious diseases;Transcription;Neurodegenerative diseases	ko05169//Epstein-Barr virus infection;ko05016//Huntington's disease;ko00230//Purine metabolism;ko00240//Pyrimidine metabolism;ko03020//RNA polymerase	K03008	GO:0005575//cellular_component;GO:0005634//nucleus;GO:0044464//cell part;GO:0032991//macromolecular complex;GO:0043233//organelle lumen;GO:0005654//nucleoplasm;GO:0044422//organelle part;GO:0043226//organelle;GO:0005623//cell;GO:0031981//nuclear lumen;GO:0043227//membrane-bounded organelle;GO:0043231//intracellular membrane-bounded organelle;GO:0005622//intracellular;GO:0043229//intracellular org…	GO:0016740//transferase activity;GO:0005488//binding;GO:0016779//nucleotidyltransferase activity;GO:0003674//molecular_function;GO:1901363//heterocyclic compound binding;GO:0003824//catalytic activity;GO:0003677//DNA binding;GO:0016772//transferase activity, transferring phosphorus-containing groups;GO:0097159//organic cyclic compound binding;GO:0003676//nucleic acid binding	GO:0046483//heterocycle metabolic process;GO:0071704//organic substance metabolic process;GO:0006396//RNA processing;GO:0090304//nucleic acid metabolic process;GO:0016071//mRNA metabolic process;GO:0043170//macromolecule metabolic process;GO:0006397//mRNA processing;GO:0009058//biosynthetic process;GO:0044260//cellular macromolecule metabolic process;GO:0006259//DNA metabolic process;GO:0034641//…
ENSG00000005108	40	144	0.44	1.03	1.8516	0.00113311	0.0176735	up	THSD7A	thrombospondin, type I, domain containing 7A [Source:HGNC Symbol;Acc:22207]	-	-	-	-	GO:0005575//cellular_component;GO:0005623//cell;GO:0005576//extracellular region;GO:0071944//cell periphery;GO:0016020//membrane;GO:0044464//cell part;GO:0005886//plasma membrane	-	GO:0044767//single-organism developmental process;GO:0009653//anatomical structure morphogenesis;GO:0008150//biological_process;GO:0030154//cell differentiation;GO:0044699//single-organism process;GO:0009987//cellular process;GO:0048869//cellular developmental process;GO:0048646//anatomical structure formation involved in morphogenesis;GO:0032502//developmental process;GO:0048856//anatomical stru…
ENSG00000005483	294.333	923.333	2.9	10.16	1.67191	0.00628872	0.0471928	up	KMT2E	lysine (K)-specific methyltransferase 2E [Source:HGNC Symbol;Acc:18541]	Metabolism	Amino acid metabolism	ko00310//Lysine degradation	K09189	GO:0005654//nucleoplasm;GO:0044446//intracellular organelle part;GO:0031974//membrane-enclosed lumen;GO:0044422//organelle part;GO:0044428//nuclear part;GO:0070013//intracellular organelle lumen;GO:0031981//nuclear lumen;GO:0044464//cell part;GO:0043233//organelle lumen;GO:0005622//intracellular;GO:0043227//membrane-bounded organelle;GO:0032991//macromolecular complex;GO:0005575//cellular_compone…	GO:0016740//transferase activity;GO:0043167//ion binding;GO:0016741//transferase activity, transferring one-carbon groups;GO:0003824//catalytic activity;GO:0003674//molecular_function;GO:0019899//enzyme binding;GO:0005488//binding;GO:0005515//protein binding;GO:0008168//methyltransferase activity;GO:0000988//transcription factor activity, protein binding	GO:0051716//cellular response to stimulus;GO:0043412//macromolecule modification;GO:0007049//cell cycle;GO:0071840//cellular component organization or biogenesis;GO:0050789//regulation of biological process;GO:0007165//signal transduction;GO:0006139//nucleobase-containing compound metabolic process;GO:0019538//protein metabolic process;GO:0006996//organelle organization;GO:0006259//DNA metabolic …
ENSG00000005486	1016.33	418	34.87	15.7633	-1.22961	0.00496156	0.0412355	down	RHBDD2	-	-	-	-	-	GO:0012505//endomembrane system;GO:0043226//organelle;GO:0044444//cytoplasmic part;GO:0043227//membrane-bounded organelle;GO:0005622//intracellular;GO:0043229//intracellular organelle;GO:0044464//cell part;GO:0044424//intracellular part;GO:0005623//cell;GO:0005575//cellular_component;GO:0005794//Golgi apparatus;GO:0043231//intracellular membrane-bounded organelle;GO:0005737//cytoplasm	GO:0003674//molecular_function;GO:0008233//peptidase activity;GO:0003824//catalytic activity;GO:0016787//hydrolase activity	-
ENSG00000006015	4021.67	646.333	313.89	68.8567	-2.55793	0.000116136	0.00506327	down	C19orf60	-	-	-	-	-	-	GO:0003674//molecular_function	-
ENSG00000007080	5752.33	1422	374.68	133.367	-1.95271	0.000619013	0.0125418	down	CCDC124	-	-	-	-	-	GO:0015630//microtubule cytoskeleton;GO:0043232//intracellular non-membrane-bounded organelle;GO:0043228//non-membrane-bounded organelle;GO:0043226//organelle;GO:0005622//intracellular;GO:0005815//microtubule organizing center;GO:0005737//cytoplasm;GO:0005623//cell;GO:0044464//cell part;GO:0005856//cytoskeleton;GO:0044446//intracellular organelle part;GO:0043229//intracellular organelle;GO:004443…	-	GO:0008150//biological_process;GO:0007049//cell cycle;GO:0009987//cellular process;GO:0044763//single-organism cellular process;GO:0044699//single-organism process;GO:0051301//cell division
ENSG00000007255	274.667	59	28.17	8.86	-2.12072	0.000689462	0.0132707	down	TRAPPC6A	trafficking protein particle complex 6A [Source:HGNC Symbol;Acc:23069]	-	-	-	-	GO:0043229//intracellular organelle;GO:0005575//cellular_component;GO:0005737//cytoplasm;GO:0044464//cell part;GO:0012505//endomembrane system;GO:0005783//endoplasmic reticulum;GO:0005794//Golgi apparatus;GO:0043231//intracellular membrane-bounded organelle;GO:0005622//intracellular;GO:0043227//membrane-bounded organelle;GO:0005623//cell;GO:0044444//cytoplasmic part;GO:0044424//intracellular part…	GO:0003674//molecular_function	GO:0051179//localization;GO:0006810//transport;GO:0016192//vesicle-mediated transport;GO:0051234//establishment of localization;GO:0008150//biological_process
ENSG00000007264	1049	382.667	25.2667	12.5967	-1.39075	0.00542542	0.0433962	down	MATK	-	Organismal Systems	Nervous system	ko04722//Neurotrophin signaling pathway	K08888	GO:0044464//cell part;GO:0005737//cytoplasm;GO:0044444//cytoplasmic part;GO:0043231//intracellular membrane-bounded organelle;GO:0005575//cellular_component;GO:0043227//membrane-bounded organelle;GO:0005829//cytosol;GO:0005634//nucleus;GO:0044424//intracellular part;GO:0005622//intracellular;GO:0005623//cell;GO:0043226//organelle;GO:0043229//intracellular organelle	GO:0016772//transferase activity, transferring phosphorus-containing groups;GO:0005488//binding;GO:0016740//transferase activity;GO:0003674//molecular_function;GO:0003824//catalytic activity;GO:0016301//kinase activity;GO:0043167//ion binding	GO:0043170//macromolecule metabolic process;GO:0019538//protein metabolic process;GO:0009987//cellular process;GO:0008152//metabolic process;GO:0043412//macromolecule modification;GO:0036211//protein modification process;GO:0032502//developmental process;GO:0044260//cellular macromolecule metabolic process;GO:0044237//cellular metabolic process;GO:0008283//cell proliferation;GO:0044238//primary m…
ENSG00000007376	2713.67	722.333	74.2	29.6533	-1.8535	0.000214095	0.00730871	down	RPUSD1	RNA pseudouridylate synthase domain containing 1 [Source:HGNC Symbol;Acc:14173]	-	-	-	-	GO:0005575//cellular_component	GO:0003674//molecular_function;GO:0016853//isomerase activity;GO:0003676//nucleic acid binding;GO:0097159//organic cyclic compound binding;GO:0003723//RNA binding;GO:0003824//catalytic activity;GO:1901363//heterocyclic compound binding;GO:0005488//binding	GO:0044237//cellular metabolic process;GO:0034641//cellular nitrogen compound metabolic process;GO:0008152//metabolic process;GO:0009987//cellular process;GO:0008150//biological_process;GO:0006807//nitrogen compound metabolic process
ENSG00000007392	2194	660	86.2367	29.8	-1.67995	7.00208e-05	0.00401637	down	LUC7L	LUC7-like (S. cerevisiae) [Source:HGNC Symbol;Acc:6723]	-	-	-	-	GO:0005634//nucleus;GO:0043227//membrane-bounded organelle;GO:0043231//intracellular membrane-bounded organelle;GO:0043229//intracellular organelle;GO:0005623//cell;GO:0043226//organelle;GO:0005622//intracellular;GO:0005575//cellular_component;GO:0044424//intracellular part;GO:0044464//cell part	GO:1901363//heterocyclic compound binding;GO:0044822//poly(A) RNA binding;GO:0003729//mRNA binding;GO:0097159//organic cyclic compound binding;GO:0003723//RNA binding;GO:0003676//nucleic acid binding;GO:0003674//molecular_function;GO:0005488//binding	GO:0022607//cellular component assembly;GO:0016070//RNA metabolic process;GO:0010467//gene expression;GO:0090304//nucleic acid metabolic process;GO:0008150//biological_process;GO:0071826//ribonucleoprotein complex subunit organization;GO:0022618//ribonucleoprotein complex assembly;GO:0034622//cellular macromolecular complex assembly;GO:0006807//nitrogen compound metabolic process;GO:0043170//macr…
ENSG00000007520	3382.31	798.667	151.71	51.2667	-2.00729	0.000712043	0.0134338	down	TSR3	TSR3, 20S rRNA accumulation, homolog (S. cerevisiae) [Source:HGNC Symbol;Acc:14175]	-	-	-	-	-	-	GO:0022613//ribonucleoprotein complex biogenesis;GO:0006807//nitrogen compound metabolic process;GO:0009987//cellular process;GO:0008152//metabolic process;GO:0071840//cellular component organization or biogenesis;GO:0044237//cellular metabolic process;GO:0008150//biological_process;GO:0042254//ribosome biogenesis;GO:0044085//cellular component biogenesis;GO:0034641//cellular nitrogen compound me…
ENSG00000008018	9715	3567.33	690.723	332.093	-1.40322	0.00182383	0.023076	down	PSMB1	proteasome (prosome, macropain) subunit, beta type, 1 [Source:HGNC Symbol;Acc:9537]	Genetic Information Processing	Folding, sorting and degradation	ko03050//Proteasome	K02732	GO:0044424//intracellular part;GO:0005829//cytosol;GO:0070013//intracellular organelle lumen;GO:0005575//cellular_component;GO:0031981//nuclear lumen;GO:0005737//cytoplasm;GO:0032991//macromolecular complex;GO:0043226//organelle;GO:0031974//membrane-enclosed lumen;GO:0005634//nucleus;GO:0043234//protein complex;GO:0044464//cell part;GO:0005654//nucleoplasm;GO:0043227//membrane-bounded organelle;G…	GO:0003824//catalytic activity;GO:0003674//molecular_function;GO:0008233//peptidase activity;GO:0016787//hydrolase activity	GO:0050896//response to stimulus;GO:0044700//single organism signaling;GO:0044403//symbiosis, encompassing mutualism through parasitism;GO:0050789//regulation of biological process;GO:0044699//single-organism process;GO:0044710//single-organism metabolic process;GO:0051716//cellular response to stimulus;GO:0007165//signal transduction;GO:0036211//protein modification process;GO:0009056//catabolic…
ENSG00000008324	265.667	113.333	24.2733	13.53	-1.19587	0.00527527	0.0427049	down	SS18L2	-	-	-	-	-	-	-	-
ENSG00000008382	794	199.667	27.5467	9.67	-1.92916	0.00063148	0.0126601	down	MPND	MPN domain containing [Source:HGNC Symbol;Acc:25934]	-	-	-	-	-	GO:0003824//catalytic activity;GO:0008233//peptidase activity;GO:0003674//molecular_function;GO:0016787//hydrolase activity	GO:0008150//biological_process
ENSG00000008516	29.3333	5.66667	0.443333	0.0966667	-2.29733	7.51304e-05	0.00412316	down	MMP25	matrix metallopeptidase 25 [Source:HGNC Symbol;Acc:14246]	-	-	-	-	GO:0005576//extracellular region;GO:0044464//cell part;GO:0005575//cellular_component;GO:0005623//cell;GO:0005886//plasma membrane;GO:0016020//membrane;GO:0044421//extracellular region part;GO:0005578//proteinaceous extracellular matrix;GO:0071944//cell periphery;GO:0031012//extracellular matrix	GO:0043167//ion binding;GO:0003824//catalytic activity;GO:0003674//molecular_function;GO:0016787//hydrolase activity;GO:0005488//binding;GO:0008233//peptidase activity	GO:0048856//anatomical structure development;GO:0006950//response to stress;GO:0032502//developmental process;GO:0008150//biological_process;GO:0050896//response to stimulus
ENSG00000008517	649.39	121.667	44.6267	12.1233	-2.34169	4.09357e-05	0.00291605	down	IL32	interleukin 32 [Source:HGNC Symbol;Acc:16830]	-	-	-	-	GO:0005575//cellular_component;GO:0044421//extracellular region part;GO:0005615//extracellular space;GO:0005576//extracellular region	GO:0003674//molecular_function	GO:0006950//response to stress;GO:0022610//biological adhesion;GO:0008150//biological_process;GO:0050896//response to stimulus;GO:0007155//cell adhesion;GO:0002376//immune system process
ENSG00000008869	250.333	772.333	1.95667	7.04	1.64056	0.0026405	0.0286247	up	HEATR5B	-	-	-	-	-	-	GO:0003674//molecular_function	-
ENSG00000008988	20826.7	5450.16	3113.97	1133.65	-1.87613	0.000403684	0.00984346	down	RPS20	-	Genetic Information Processing	Translation	ko03010//Ribosome	K02969	GO:0032991//macromolecular complex;GO:0043232//intracellular non-membrane-bounded organelle;GO:0044444//cytoplasmic part;GO:0005622//intracellular;GO:0005623//cell;GO:0044464//cell part;GO:0005575//cellular_component;GO:0005737//cytoplasm;GO:0044424//intracellular part;GO:0043228//non-membrane-bounded organelle;GO:0005840//ribosome;GO:0043229//intracellular organelle;GO:0030529//intracellular rib…	GO:0003735//structural constituent of ribosome;GO:0097159//organic cyclic compound binding;GO:0005488//binding;GO:0003676//nucleic acid binding;GO:1901363//heterocyclic compound binding;GO:0005198//structural molecule activity;GO:0003723//RNA binding;GO:0003674//molecular_function	GO:0051234//establishment of localization;GO:0071702//organic substance transport;GO:0008150//biological_process;GO:0044270//cellular nitrogen compound catabolic process;GO:1901575//organic substance catabolic process;GO:0046483//heterocycle metabolic process;GO:1901360//organic cyclic compound metabolic process;GO:0044237//cellular metabolic process;GO:0015031//protein transport;GO:0044248//cell…
ENSG00000009694	613.333	1737	2.35333	7.38667	1.53038	0.00546251	0.0435746	up	TENM1	teneurin transmembrane protein 1 [Source:HGNC Symbol;Acc:8117]	-	-	-	-	GO:0005623//cell;GO:0044446//intracellular organelle part;GO:0044428//nuclear part;GO:0070013//intracellular organelle lumen;GO:0043229//intracellular organelle;GO:0005737//cytoplasm;GO:0005856//cytoskeleton;GO:0005783//endoplasmic reticulum;GO:0012505//endomembrane system;GO:0043233//organelle lumen;GO:0043227//membrane-bounded organelle;GO:0005622//intracellular;GO:0005575//cellular_component;G…	GO:0005488//binding;GO:0003674//molecular_function;GO:0043167//ion binding	GO:0002376//immune system process;GO:0007165//signal transduction;GO:0009987//cellular process;GO:0044237//cellular metabolic process;GO:0006807//nitrogen compound metabolic process;GO:0050794//regulation of cellular process;GO:0023052//signaling;GO:0050789//regulation of biological process;GO:0006950//response to stress;GO:0044700//single organism signaling;GO:0050896//response to stimulus;GO:00…
ENSG00000010438	142.333	33.3333	10.8667	4.60333	-2.01776	0.00169827	0.0221694	down	PRSS3	protease, serine, 3 [Source:HGNC Symbol;Acc:9486]	Organismal Systems;Environmental Information Processing;Human Diseases	Infectious diseases;Digestive system;Signaling molecules and interaction	ko04080//Neuroactive ligand-receptor interaction;ko05164//Influenza A;ko04974//Protein digestion and absorption;ko04972//Pancreatic secretion	K01312	GO:0005615//extracellular space;GO:0044421//extracellular region part;GO:0005576//extracellular region;GO:0005575//cellular_component	GO:0008233//peptidase activity;GO:0003674//molecular_function;GO:0005488//binding;GO:0016787//hydrolase activity;GO:0043167//ion binding;GO:0003824//catalytic activity	GO:0044699//single-organism process;GO:0009987//cellular process;GO:0002376//immune system process;GO:0050896//response to stimulus;GO:0010467//gene expression;GO:0040011//locomotion;GO:0044281//small molecule metabolic process;GO:0051604//protein maturation;GO:0048870//cell motility;GO:0044710//single-organism metabolic process;GO:0071704//organic substance metabolic process;GO:0008150//biologic…
ENSG00000011009	2253	778.667	67.13	31.8033	-1.474	0.00265959	0.0287122	down	LYPLA2	lysophospholipase II [Source:HGNC Symbol;Acc:6738]	Metabolism	Lipid metabolism	ko00564//Glycerophospholipid metabolism	K06130	GO:0005623//cell;GO:0005622//intracellular;GO:0044464//cell part;GO:0044424//intracellular part;GO:0005575//cellular_component;GO:0005737//cytoplasm	GO:0003674//molecular_function	GO:0008152//metabolic process;GO:0071704//organic substance metabolic process;GO:0044710//single-organism metabolic process;GO:0044238//primary metabolic process;GO:0008150//biological_process;GO:0006629//lipid metabolic process;GO:0044281//small molecule metabolic process;GO:0044699//single-organism process
ENSG00000011052	347.717	99.0767	24.71	9.84	-1.76055	0.00380808	0.0349212	down	NME2	NME/NM23 nucleoside diphosphate kinase 2 [Source:HGNC Symbol;Acc:7850]	Metabolism	Nucleotide metabolism	ko00230//Purine metabolism;ko00230//Purine metabolism;ko00240//Pyrimidine metabolism;ko00240//Pyrimidine metabolism	K00940	GO:0005575//cellular_component;GO:0005634//nucleus;GO:0043232//intracellular non-membrane-bounded organelle;GO:0044430//cytoskeletal part;GO:0005623//cell;GO:0044422//organelle part;GO:0043231//intracellular membrane-bounded organelle;GO:0044424//intracellular part;GO:0044464//cell part;GO:0015630//microtubule cytoskeleton;GO:0005829//cytosol;GO:0043228//non-membrane-bounded organelle;GO:0043229/…	GO:0016301//kinase activity;GO:1901363//heterocyclic compound binding;GO:0003677//DNA binding;GO:0016772//transferase activity, transferring phosphorus-containing groups;GO:0003824//catalytic activity;GO:0005515//protein binding;GO:0097159//organic cyclic compound binding;GO:0005488//binding;GO:0019899//enzyme binding;GO:0003674//molecular_function;GO:0043167//ion binding;GO:0003676//nucleic acid…	GO:0044237//cellular metabolic process;GO:0048869//cellular developmental process;GO:0030154//cell differentiation;GO:0044767//single-organism developmental process;GO:0044763//single-organism cellular process;GO:0023052//signaling;GO:0008150//biological_process;GO:0009058//biosynthetic process;GO:0007154//cell communication;GO:0044700//single organism signaling;GO:0009987//cellular process;GO:00…
ENSG00000011243	3435.67	1193.33	83.0633	40.65	-1.46738	0.00129801	0.0188533	down	AKAP8L	A kinase (PRKA) anchor protein 8-like [Source:HGNC Symbol;Acc:29857]	Human Diseases	Infectious diseases	ko05169//Epstein-Barr virus infection	K15978	GO:0005575//cellular_component;GO:0005737//cytoplasm;GO:0005623//cell;GO:0043226//organelle;GO:0043229//intracellular organelle;GO:0044424//intracellular part;GO:0005622//intracellular;GO:0005634//nucleus;GO:0043231//intracellular membrane-bounded organelle;GO:0043227//membrane-bounded organelle;GO:0044464//cell part	GO:0003676//nucleic acid binding;GO:1901363//heterocyclic compound binding;GO:0003674//molecular_function;GO:0097159//organic cyclic compound binding;GO:0005515//protein binding;GO:0005488//binding;GO:0043167//ion binding;GO:0003677//DNA binding;GO:0019899//enzyme binding	GO:0008150//biological_process
ENSG00000011332	303.667	60.3333	7.75333	2.83	-2.27037	8.03503e-05	0.00426498	down	DPF1	-	-	-	-	-	GO:0043227//membrane-bounded organelle;GO:0005622//intracellular;GO:0005623//cell;GO:0043234//protein complex;GO:0043226//organelle;GO:0005634//nucleus;GO:0043231//intracellular membrane-bounded organelle;GO:0032991//macromolecular complex;GO:0044464//cell part;GO:0043229//intracellular organelle;GO:0005737//cytoplasm;GO:0005575//cellular_component;GO:0044424//intracellular part	GO:0005488//binding;GO:0043167//ion binding;GO:0003674//molecular_function	GO:0034641//cellular nitrogen compound metabolic process;GO:0008152//metabolic process;GO:0009058//biosynthetic process;GO:0008150//biological_process;GO:0009987//cellular process;GO:0044699//single-organism process;GO:0032502//developmental process;GO:0048856//anatomical structure development;GO:0044763//single-organism cellular process;GO:0006807//nitrogen compound metabolic process;GO:0008219/…
ENSG00000011426	4884.67	13867.7	73.0867	192.837	1.52508	0.000986906	0.0163069	up	ANLN	anillin, actin binding protein [Source:HGNC Symbol;Acc:14082]	-	-	-	-	GO:0043227//membrane-bounded organelle;GO:0043229//intracellular organelle;GO:0005575//cellular_component;GO:0043228//non-membrane-bounded organelle;GO:0043231//intracellular membrane-bounded organelle;GO:0044424//intracellular part;GO:0044464//cell part;GO:0005634//nucleus;GO:0005622//intracellular;GO:0043226//organelle;GO:0005737//cytoplasm;GO:0005856//cytoskeleton;GO:0043232//intracellular non…	GO:0008092//cytoskeletal protein binding;GO:0005515//protein binding;GO:0005488//binding;GO:0003674//molecular_function	GO:0070271//protein complex biogenesis;GO:0006996//organelle organization;GO:0071822//protein complex subunit organization;GO:0065003//macromolecular complex assembly;GO:0007010//cytoskeleton organization;GO:0044699//single-organism process;GO:0022607//cellular component assembly;GO:0000280//nuclear division;GO:0022402//cell cycle process;GO:0008150//biological_process;GO:0006461//protein complex…
ENSG00000012504	5.66667	0	0.146667	0.001	-5.54504	0.000914233	0.0154636	down	NR1H4	nuclear receptor subfamily 1, group H, member 4 [Source:HGNC Symbol;Acc:7967]	Organismal Systems	Digestive system	ko04976//Bile secretion	K08537	GO:0044422//organelle part;GO:0005575//cellular_component;GO:0031981//nuclear lumen;GO:0043231//intracellular membrane-bounded organelle;GO:0044464//cell part;GO:0043226//organelle;GO:0031974//membrane-enclosed lumen;GO:0043232//intracellular non-membrane-bounded organelle;GO:0043233//organelle lumen;GO:0005694//chromosome;GO:0043228//non-membrane-bounded organelle;GO:0044424//intracellular part;…	GO:0043167//ion binding;GO:0003676//nucleic acid binding;GO:0004871//signal transducer activity;GO:0097159//organic cyclic compound binding;GO:0008289//lipid binding;GO:0008134//transcription factor binding;GO:0003677//DNA binding;GO:0001071//nucleic acid binding transcription factor activity;GO:0005488//binding;GO:0003674//molecular_function;GO:1901363//heterocyclic compound binding;GO:0005515//…	GO:0008150//biological_process;GO:0050896//response to stimulus;GO:0023052//signaling;GO:0034641//cellular nitrogen compound metabolic process;GO:0044238//primary metabolic process;GO:0044763//single-organism cellular process;GO:0007165//signal transduction;GO:0065007//biological regulation;GO:0050794//regulation of cellular process;GO:0051716//cellular response to stimulus;GO:0006807//nitrogen c…
ENSG00000013275	3404.67	1526	124.173	70.07	-1.11761	0.00564071	0.0444528	down	PSMC4	proteasome (prosome, macropain) 26S subunit, ATPase, 4 [Source:HGNC Symbol;Acc:9551]	Genetic Information Processing;Human Diseases	Infectious diseases;Folding, sorting and degradation	ko05169//Epstein-Barr virus infection;ko03050//Proteasome	K03063	GO:0005634//nucleus;GO:0070013//intracellular organelle lumen;GO:0005737//cytoplasm;GO:0005623//cell;GO:0005622//intracellular;GO:0043233//organelle lumen;GO:0005654//nucleoplasm;GO:0005739//mitochondrion;GO:0043231//intracellular membrane-bounded organelle;GO:0044444//cytoplasmic part;GO:0043226//organelle;GO:0005575//cellular_component;GO:0044428//nuclear part;GO:0043234//protein complex;GO:004…	GO:0004386//helicase activity;GO:0043167//ion binding;GO:0003674//molecular_function;GO:0016787//hydrolase activity;GO:0016462//pyrophosphatase activity;GO:0016817//hydrolase activity, acting on acid anhydrides;GO:0003824//catalytic activity;GO:0017111//nucleoside-triphosphatase activity;GO:0016887//ATPase activity;GO:0016818//hydrolase activity, acting on acid anhydrides, in phosphorus-containin…	GO:0023052//signaling;GO:0044707//single-multicellular organism process;GO:0036211//protein modification process;GO:1901575//organic substance catabolic process;GO:0007165//signal transduction;GO:0044763//single-organism cellular process;GO:0051704//multi-organism process;GO:0050794//regulation of cellular process;GO:0006139//nucleobase-containing compound metabolic process;GO:0006725//cellular a…
ENSG00000013306	10151.7	3785.67	381.507	180.603	-1.37345	0.00339684	0.0329111	down	SLC25A39	-	-	-	-	-	GO:0043229//intracellular organelle;GO:0005737//cytoplasm;GO:0043231//intracellular membrane-bounded organelle;GO:0043226//organelle;GO:0044464//cell part;GO:0044424//intracellular part;GO:0005622//intracellular;GO:0043227//membrane-bounded organelle;GO:0005739//mitochondrion;GO:0005623//cell;GO:0005575//cellular_component;GO:0044444//cytoplasmic part	-	GO:0006810//transport;GO:0051179//localization;GO:0051234//establishment of localization;GO:0055085//transmembrane transport;GO:0034641//cellular nitrogen compound metabolic process;GO:0044237//cellular metabolic process;GO:0008150//biological_process;GO:0009987//cellular process;GO:0008152//metabolic process;GO:0051186//cofactor metabolic process;GO:0009058//biosynthetic process;GO:0006807//nitr…
ENSG00000014123	616.667	1557.67	7.57667	21.7967	1.35839	0.00229663	0.0265103	up	UFL1	UFM1-specific ligase 1 [Source:HGNC Symbol;Acc:23039]	-	-	-	-	GO:0005623//cell;GO:0044444//cytoplasmic part;GO:0005634//nucleus;GO:0043227//membrane-bounded organelle;GO:0005575//cellular_component;GO:0012505//endomembrane system;GO:0043226//organelle;GO:0005783//endoplasmic reticulum;GO:0005737//cytoplasm;GO:0044464//cell part;GO:0043229//intracellular organelle;GO:0005622//intracellular;GO:0044424//intracellular part;GO:0043231//intracellular membrane-bou…	GO:0016874//ligase activity;GO:0003824//catalytic activity;GO:0003674//molecular_function	GO:0050896//response to stimulus;GO:0043412//macromolecule modification;GO:0044260//cellular macromolecule metabolic process;GO:0009987//cellular process;GO:0044267//cellular protein metabolic process;GO:0006464//cellular protein modification process;GO:0044238//primary metabolic process;GO:0071704//organic substance metabolic process;GO:0006950//response to stress;GO:0043170//macromolecule metab…
ENSG00000014914	60.6667	138	1.97667	4.33	1.18622	0.0060717	0.0462549	up	MTMR11	myotubularin related protein 11 [Source:HGNC Symbol;Acc:24307]	-	-	-	-	-	GO:0003824//catalytic activity;GO:0016791//phosphatase activity;GO:0042578//phosphoric ester hydrolase activity;GO:0003674//molecular_function;GO:0016788//hydrolase activity, acting on ester bonds;GO:0016787//hydrolase activity	GO:0008150//biological_process
ENSG00000015520	20.3333	0.666667	0.19	0.01	-4.66341	1.76854e-08	5.71395e-06	down	NPC1L1	NPC1-like 1 [Source:HGNC Symbol;Acc:7898]	Organismal Systems	Digestive system	ko04975//Fat digestion and absorption	K14461	GO:0005623//cell;GO:0016020//membrane;GO:0005622//intracellular;GO:0044444//cytoplasmic part;GO:0031410//cytoplasmic vesicle;GO:0043227//membrane-bounded organelle;GO:0016023//cytoplasmic, membrane-bounded vesicle;GO:0031982//vesicle;GO:0043229//intracellular organelle;GO:0031988//membrane-bounded vesicle;GO:0071944//cell periphery;GO:0005737//cytoplasm;GO:0005575//cellular_component;GO:0044464//…	GO:0005515//protein binding;GO:0019899//enzyme binding;GO:0003674//molecular_function;GO:0004871//signal transducer activity;GO:0008092//cytoskeletal protein binding;GO:0005488//binding	GO:0042592//homeostatic process;GO:0065007//biological regulation;GO:0008150//biological_process;GO:0044238//primary metabolic process;GO:0044281//small molecule metabolic process;GO:0065008//regulation of biological quality;GO:0051179//localization;GO:0006810//transport;GO:0008152//metabolic process;GO:0009058//biosynthetic process;GO:0044699//single-organism process;GO:0006629//lipid metabolic …
ENSG00000016082	16	4.33333	0.323333	0.136667	-1.83776	0.00564255	0.0444528	down	ISL1	ISL LIM homeobox 1 [Source:HGNC Symbol;Acc:6132]	Cellular Processes	Cellular commiunity	ko04550//Signaling pathways regulating pluripotency of stem cells	K09370	GO:0043231//intracellular membrane-bounded organelle;GO:0005622//intracellular;GO:0043227//membrane-bounded organelle;GO:0005575//cellular_component;GO:0005623//cell;GO:0005634//nucleus;GO:0043229//intracellular organelle;GO:0044464//cell part;GO:0043226//organelle;GO:0005737//cytoplasm;GO:0044424//intracellular part	GO:0005515//protein binding;GO:0008134//transcription factor binding;GO:0005488//binding;GO:0000988//transcription factor activity, protein binding;GO:0003674//molecular_function;GO:0003677//DNA binding;GO:0003676//nucleic acid binding;GO:1901363//heterocyclic compound binding;GO:0001071//nucleic acid binding transcription factor activity;GO:0043167//ion binding;GO:0097159//organic cyclic compoun…	GO:0051674//localization of cell;GO:0048856//anatomical structure development;GO:0044767//single-organism developmental process;GO:0008150//biological_process;GO:0048646//anatomical structure formation involved in morphogenesis;GO:0032501//multicellular organismal process;GO:0032989//cellular component morphogenesis;GO:0009653//anatomical structure morphogenesis;GO:0032502//developmental process;…
ENSG00000017621	71.6667	17.6667	3.86	1.61	-1.94799	0.00190397	0.0238246	down	MAGIX	MAGI family member, X-linked [Source:HGNC Symbol;Acc:30006]	-	-	-	-	-	GO:0003674//molecular_function	-
ENSG00000018625	1	7.33333	0.0133333	0.146667	2.74296	0.00588069	0.0454141	up	ATP1A2	ATPase, Na+/K+ transporting, alpha 2 polypeptide [Source:HGNC Symbol;Acc:800]	Organismal Systems;Environmental Information Processing	Excretory system;Signal transduction;Digestive system;Endocrine system;Circulatory system	ko04024//cAMP signaling pathway;ko04022//cGMP - PKG signaling pathway;ko04261//Adrenergic signaling in cardiomyocytes;ko04919//Thyroid hormone signaling pathway;ko04974//Protein digestion and absorption;ko04970//Salivary secretion;ko04972//Pancreatic secretion;ko04911//Insulin secretion;ko04260//Cardiac muscle contraction;ko04971//Gastric acid secretion;ko04918//Thyroid hormone synthesis;ko04976/…	K01539	GO:0043227//membrane-bounded organelle;GO:0005773//vacuole;GO:0005768//endosome;GO:0005623//cell;GO:0043229//intracellular organelle;GO:0016020//membrane;GO:0005886//plasma membrane;GO:0043231//intracellular membrane-bounded organelle;GO:0005737//cytoplasm;GO:0005575//cellular_component;GO:0032991//macromolecular complex;GO:0005622//intracellular;GO:0044424//intracellular part;GO:0043226//organel…	GO:0016787//hydrolase activity;GO:0016818//hydrolase activity, acting on acid anhydrides, in phosphorus-containing anhydrides;GO:0017111//nucleoside-triphosphatase activity;GO:0022857//transmembrane transporter activity;GO:0003824//catalytic activity;GO:0003674//molecular_function;GO:0016817//hydrolase activity, acting on acid anhydrides;GO:0043167//ion binding;GO:0016887//ATPase activity;GO:0016…	GO:0003008//system process;GO:0044699//single-organism process;GO:0042592//homeostatic process;GO:0008152//metabolic process;GO:0051234//establishment of localization;GO:0007267//cell-cell signaling;GO:0003013//circulatory system process;GO:0040011//locomotion;GO:0023052//signaling;GO:0006807//nitrogen compound metabolic process;GO:0050877//neurological system process;GO:0032501//multicellular or…
ENSG00000023445	23	104.667	0.246667	1.19	2.21063	3.81401e-06	0.00052677	up	BIRC3	baculoviral IAP repeat containing 3 [Source:HGNC Symbol;Acc:591]	Genetic Information Processing;Organismal Systems;Cellular Processes;Environmental Information Processing;Human Diseases	Cellular commiunity;Immune system;Cell growth and death;Signal transduction;Infectious diseases;Folding, sorting and degradation;Cancers	ko05200//Pathways in cancer;ko05202//Transcriptional misregulation in cancers;ko04510//Focal adhesion;ko05145//Toxoplasmosis;ko04120//Ubiquitin mediated proteolysis;ko04064//NF-kappa B signaling pathway;ko04668//TNF signaling pathway;ko04210//Apoptosis;ko05222//Small cell lung cancer;ko04621//NOD-like receptor signaling pathway	K16060	GO:0044424//intracellular part;GO:0005829//cytosol;GO:0005575//cellular_component;GO:0043229//intracellular organelle;GO:0044444//cytoplasmic part;GO:0005737//cytoplasm;GO:0005634//nucleus;GO:0043226//organelle;GO:0043227//membrane-bounded organelle;GO:0005623//cell;GO:0005622//intracellular;GO:0043231//intracellular membrane-bounded organelle;GO:0044464//cell part	GO:0043167//ion binding;GO:0005488//binding;GO:0016874//ligase activity;GO:0003824//catalytic activity;GO:0003674//molecular_function	GO:0044699//single-organism process;GO:0007154//cell communication;GO:0002376//immune system process;GO:0050794//regulation of cellular process;GO:0008219//cell death;GO:0051716//cellular response to stimulus;GO:0009987//cellular process;GO:0044763//single-organism cellular process;GO:0050789//regulation of biological process;GO:0006950//response to stress;GO:0044700//single organism signaling;GO…
ENSG00000023516	603	1496.33	3.00667	8.38333	1.33795	0.00550413	0.043726	up	AKAP11	A kinase (PRKA) anchor protein 11 [Source:HGNC Symbol;Acc:369]	-	-	-	-	GO:0031981//nuclear lumen;GO:0070013//intracellular organelle lumen;GO:0044424//intracellular part;GO:0071944//cell periphery;GO:0005623//cell;GO:0031974//membrane-enclosed lumen;GO:0005634//nucleus;GO:0043233//organelle lumen;GO:0015630//microtubule cytoskeleton;GO:0043227//membrane-bounded organelle;GO:0043226//organelle;GO:0043231//intracellular membrane-bounded organelle;GO:0005737//cytoplasm…	GO:0003674//molecular_function;GO:0019899//enzyme binding;GO:0005515//protein binding;GO:0005488//binding	GO:0050789//regulation of biological process;GO:0023052//signaling;GO:0008150//biological_process;GO:0044700//single organism signaling;GO:0050896//response to stimulus;GO:0007154//cell communication;GO:0050794//regulation of cellular process;GO:0044763//single-organism cellular process;GO:0007165//signal transduction;GO:0065007//biological regulation;GO:0051716//cellular response to stimulus;GO:…
ENSG00000023572	1016.33	307.667	126.14	50.1433	-1.69088	5.34699e-05	0.00346277	down	GLRX2	glutaredoxin 2 [Source:HGNC Symbol;Acc:16065]	-	-	-	-	GO:0044444//cytoplasmic part;GO:0043231//intracellular membrane-bounded organelle;GO:0005739//mitochondrion;GO:0044424//intracellular part;GO:0005575//cellular_component;GO:0005634//nucleus;GO:0043226//organelle;GO:0044464//cell part;GO:0043227//membrane-bounded organelle;GO:0043229//intracellular organelle;GO:0005623//cell;GO:0005622//intracellular;GO:0005737//cytoplasm	GO:0005488//binding;GO:0003824//catalytic activity;GO:0016853//isomerase activity;GO:0003674//molecular_function;GO:0043167//ion binding;GO:0016491//oxidoreductase activity	GO:0006259//DNA metabolic process;GO:0006950//response to stress;GO:0008150//biological_process;GO:0065007//biological regulation;GO:0006520//cellular amino acid metabolic process;GO:0046483//heterocycle metabolic process;GO:0044260//cellular macromolecule metabolic process;GO:0044281//small molecule metabolic process;GO:0006807//nitrogen compound metabolic process;GO:0044699//single-organism pro…
ENSG00000023902	1292.33	448.333	43.6533	18.4167	-1.46334	0.00356418	0.0334996	down	PLEKHO1	pleckstrin homology domain containing, family O member 1 [Source:HGNC Symbol;Acc:24310]	-	-	-	-	GO:0005634//nucleus;GO:0043231//intracellular membrane-bounded organelle;GO:0044464//cell part;GO:0043227//membrane-bounded organelle;GO:0005886//plasma membrane;GO:0005737//cytoplasm;GO:0005575//cellular_component;GO:0043226//organelle;GO:0005622//intracellular;GO:0005623//cell;GO:0016020//membrane;GO:0071944//cell periphery;GO:0044424//intracellular part;GO:0043229//intracellular organelle	GO:0003674//molecular_function	-
ENSG00000025708	320.117	66.3333	9.34333	2.70667	-2.18578	0.000846506	0.0147979	down	TYMP	thymidine phosphorylase [Source:HGNC Symbol;Acc:3148]	Human Diseases;Metabolism	Xenobiotics biodegradation and metabolism;Nucleotide metabolism;Cancers	ko00240//Pyrimidine metabolism;ko00983//Drug metabolism - other enzymes;ko05219//Bladder cancer	K00758	GO:0005622//intracellular;GO:0005575//cellular_component;GO:0005829//cytosol;GO:0005623//cell;GO:0044464//cell part;GO:0005737//cytoplasm;GO:0044444//cytoplasmic part;GO:0044424//intracellular part	GO:0003824//catalytic activity;GO:0016740//transferase activity;GO:0003674//molecular_function;GO:0016757//transferase activity, transferring glycosyl groups	GO:0040011//locomotion;GO:0016043//cellular component organization;GO:0044767//single-organism developmental process;GO:0044248//cellular catabolic process;GO:0007005//mitochondrion organization;GO:0048869//cellular developmental process;GO:0006807//nitrogen compound metabolic process;GO:0043170//macromolecule metabolic process;GO:0034655//nucleobase-containing compound catabolic process;GO:00442…
ENSG00000025770	3492	1346.33	90.15	51.4167	-1.31825	0.00492306	0.0410443	down	NCAPH2	non-SMC condensin II complex, subunit H2 [Source:HGNC Symbol;Acc:25071]	-	-	-	-	GO:0043232//intracellular non-membrane-bounded organelle;GO:0043229//intracellular organelle;GO:0044424//intracellular part;GO:0044464//cell part;GO:0005623//cell;GO:0043231//intracellular membrane-bounded organelle;GO:0005622//intracellular;GO:0005575//cellular_component;GO:0005634//nucleus;GO:0043228//non-membrane-bounded organelle;GO:0043226//organelle;GO:0005694//chromosome;GO:0043227//membra…	GO:0003674//molecular_function	GO:0009987//cellular process;GO:0006807//nitrogen compound metabolic process;GO:0046483//heterocycle metabolic process;GO:0044238//primary metabolic process;GO:0090304//nucleic acid metabolic process;GO:0034641//cellular nitrogen compound metabolic process;GO:0008152//metabolic process;GO:0051276//chromosome organization;GO:1901360//organic cyclic compound metabolic process;GO:0071840//cellular c…
ENSG00000026950	48	113.613	0.8	2.78333	1.25221	0.00312406	0.0314894	up	BTN3A1	-	-	-	-	-	GO:0005623//cell;GO:0005575//cellular_component;GO:0005886//plasma membrane;GO:0071944//cell periphery;GO:0044464//cell part;GO:0016020//membrane	GO:0003674//molecular_function	GO:0065007//biological regulation;GO:0008150//biological_process;GO:0044700//single organism signaling;GO:0050896//response to stimulus;GO:0007154//cell communication;GO:0044699//single-organism process;GO:0044763//single-organism cellular process;GO:0002376//immune system process;GO:0008283//cell proliferation;GO:0009987//cellular process;GO:0023052//signaling;GO:0051716//cellular response to st…
ENSG00000028277	14	2.66667	0.22	0.13	-2.28698	0.00160726	0.0213667	down	POU2F2	POU class 2 homeobox 2 [Source:HGNC Symbol;Acc:9213]	-	-	-	-	GO:0044424//intracellular part;GO:0005575//cellular_component;GO:0005622//intracellular;GO:0044464//cell part;GO:0043229//intracellular organelle;GO:0043227//membrane-bounded organelle;GO:0043231//intracellular membrane-bounded organelle;GO:0005623//cell;GO:0005737//cytoplasm;GO:0005634//nucleus;GO:0043226//organelle	GO:0003674//molecular_function;GO:0003677//DNA binding;GO:1901363//heterocyclic compound binding;GO:0097159//organic cyclic compound binding;GO:0003676//nucleic acid binding;GO:0005488//binding;GO:0001071//nucleic acid binding transcription factor activity	GO:0021700//developmental maturation;GO:0051234//establishment of localization;GO:0008152//metabolic process;GO:0008150//biological_process;GO:0030154//cell differentiation;GO:0044763//single-organism cellular process;GO:0048869//cellular developmental process;GO:0006810//transport;GO:0009058//biosynthetic process;GO:0034641//cellular nitrogen compound metabolic process;GO:0044699//single-organis…
ENSG00000033011	1112.19	486.587	30.45	17.1033	-1.14732	0.00407654	0.0365366	down	ALG1	ALG1, chitobiosyldiphosphodolichol beta-mannosyltransferase [Source:HGNC Symbol;Acc:18294]	Metabolism	Glycan biosynthesis and metabolism	ko00510//N-Glycan biosynthesis	K03842	GO:0043229//intracellular organelle;GO:0005575//cellular_component;GO:0005737//cytoplasm;GO:0044444//cytoplasmic part;GO:0012505//endomembrane system;GO:0005783//endoplasmic reticulum;GO:0043231//intracellular membrane-bounded organelle;GO:0005622//intracellular;GO:0043226//organelle;GO:0043227//membrane-bounded organelle;GO:0044464//cell part;GO:0005623//cell;GO:0044424//intracellular part	GO:0003674//molecular_function;GO:0016740//transferase activity;GO:0003824//catalytic activity;GO:0016757//transferase activity, transferring glycosyl groups	GO:0044710//single-organism metabolic process;GO:0044238//primary metabolic process;GO:0044237//cellular metabolic process;GO:0044699//single-organism process;GO:0036211//protein modification process;GO:0006464//cellular protein modification process;GO:0008150//biological_process;GO:0044260//cellular macromolecule metabolic process;GO:0043170//macromolecule metabolic process;GO:0006629//lipid met…
ENSG00000033327	294.667	788	2.62	8.55667	1.43835	0.00129887	0.0188533	up	GAB2	GRB2-associated binding protein 2 [Source:HGNC Symbol;Acc:14458]	Organismal Systems;Environmental Information Processing;Human Diseases	Immune system;Signal transduction;Development;Cancers	ko04014//Ras signaling pathway;ko04380//Osteoclast differentiation;ko04071//Sphingolipid signaling pathway;ko04666//Fc gamma R-mediated phagocytosis;ko05220//Chronic myeloid leukemia;ko04664//Fc epsilon RI signaling pathway	K08091	GO:0005829//cytosol;GO:0005622//intracellular;GO:0005623//cell;GO:0044444//cytoplasmic part;GO:0005737//cytoplasm;GO:0071944//cell periphery;GO:0016020//membrane;GO:0005886//plasma membrane;GO:0005575//cellular_component;GO:0044424//intracellular part;GO:0044464//cell part	GO:0043167//ion binding;GO:0005515//protein binding;GO:0008289//lipid binding;GO:0003674//molecular_function;GO:0030674//protein binding, bridging;GO:0005488//binding;GO:0060090//binding, bridging	GO:0044699//single-organism process;GO:0051716//cellular response to stimulus;GO:0040011//locomotion;GO:0044763//single-organism cellular process;GO:0009987//cellular process;GO:0044700//single organism signaling;GO:0065007//biological regulation;GO:0030154//cell differentiation;GO:0032502//developmental process;GO:0023052//signaling;GO:0007154//cell communication;GO:0050794//regulation of cellul…
ENSG00000034152	1463.67	447	33.74	12.5233	-1.67558	5.38935e-05	0.00347009	down	MAP2K3	-	Organismal Systems;Environmental Information Processing;Human Diseases	Immune system;Signal transduction;Sensory system;Infectious diseases;Neurodegenerative diseases;Endocrine system	ko05169//Epstein-Barr virus infection;ko05164//Influenza A;ko04010//MAPK signaling pathway;ko05145//Toxoplasmosis;ko04015//Rap1 signaling pathway;ko04668//TNF signaling pathway;ko04620//Toll-like receptor signaling pathway;ko04750//Inflammatory mediator regulation of TRP channels;ko04912//GnRH signaling pathway;ko04664//Fc epsilon RI signaling pathway;ko05014//Amyotrophic lateral sclerosis (ALS)	K04432	GO:0031981//nuclear lumen;GO:0005634//nucleus;GO:0031974//membrane-enclosed lumen;GO:0043226//organelle;GO:0005623//cell;GO:0005829//cytosol;GO:0005575//cellular_component;GO:0044464//cell part;GO:0070013//intracellular organelle lumen;GO:0044424//intracellular part;GO:0005654//nucleoplasm;GO:0043233//organelle lumen;GO:0005737//cytoplasm;GO:0043227//membrane-bounded organelle;GO:0044444//cytopla…	GO:0019899//enzyme binding;GO:0016301//kinase activity;GO:0016772//transferase activity, transferring phosphorus-containing groups;GO:0003824//catalytic activity;GO:0005515//protein binding;GO:0016740//transferase activity;GO:0004871//signal transducer activity;GO:0043167//ion binding;GO:0003674//molecular_function;GO:0005488//binding	GO:0043170//macromolecule metabolic process;GO:0051716//cellular response to stimulus;GO:0043412//macromolecule modification;GO:0044260//cellular macromolecule metabolic process;GO:0007165//signal transduction;GO:0036211//protein modification process;GO:0003008//system process;GO:0065007//biological regulation;GO:0008150//biological_process;GO:0006464//cellular protein modification process;GO:004…
ENSG00000034510	64223.3	8752.33	16180.9	3745.16	-2.79544	5.35885e-05	0.00346277	down	TMSB10	thymosin beta 10 [Source:HGNC Symbol;Acc:11879]	-	-	-	-	GO:0043228//non-membrane-bounded organelle;GO:0043232//intracellular non-membrane-bounded organelle;GO:0043226//organelle;GO:0005856//cytoskeleton;GO:0005622//intracellular;GO:0044464//cell part;GO:0005623//cell;GO:0005575//cellular_component;GO:0043229//intracellular organelle;GO:0044424//intracellular part;GO:0005737//cytoplasm	GO:0005515//protein binding;GO:0005488//binding;GO:0003674//molecular_function;GO:0008092//cytoskeletal protein binding	GO:0007010//cytoskeleton organization;GO:0006996//organelle organization;GO:0016043//cellular component organization;GO:0071840//cellular component organization or biogenesis;GO:0008150//biological_process;GO:0009987//cellular process
ENSG00000037241	2050.33	756.667	270.31	119.277	-1.39899	0.000605675	0.0124105	down	RPL26L1	ribosomal protein L26-like 1 [Source:HGNC Symbol;Acc:17050]	Genetic Information Processing	Translation	ko03010//Ribosome	K02898	GO:0043229//intracellular organelle;GO:0005623//cell;GO:0043232//intracellular non-membrane-bounded organelle;GO:0005829//cytosol;GO:0032991//macromolecular complex;GO:0030529//intracellular ribonucleoprotein complex;GO:0043228//non-membrane-bounded organelle;GO:0005737//cytoplasm;GO:0005622//intracellular;GO:1990904//ribonucleoprotein complex;GO:0044444//cytoplasmic part;GO:0005840//ribosome;GO:…	GO:0003735//structural constituent of ribosome;GO:0003674//molecular_function;GO:0005198//structural molecule activity	GO:1901566//organonitrogen compound biosynthetic process;GO:0019538//protein metabolic process;GO:0019439//aromatic compound catabolic process;GO:0044248//cellular catabolic process;GO:0034641//cellular nitrogen compound metabolic process;GO:0043170//macromolecule metabolic process;GO:0008152//metabolic process;GO:1901360//organic cyclic compound metabolic process;GO:0006518//peptide metabolic pr…
ENSG00000037897	332.667	133.333	13.0633	5.45667	-1.26182	0.00533399	0.0429497	down	METTL1	methyltransferase like 1 [Source:HGNC Symbol;Acc:7030]	-	-	-	-	GO:0044464//cell part;GO:0005634//nucleus;GO:0005622//intracellular;GO:0005575//cellular_component;GO:0043229//intracellular organelle;GO:0043231//intracellular membrane-bounded organelle;GO:0005623//cell;GO:0044424//intracellular part;GO:0043226//organelle;GO:0005737//cytoplasm;GO:0043227//membrane-bounded organelle	GO:0005488//binding;GO:0003674//molecular_function;GO:0008168//methyltransferase activity;GO:0016741//transferase activity, transferring one-carbon groups;GO:1901363//heterocyclic compound binding;GO:0016740//transferase activity;GO:0003723//RNA binding;GO:0097159//organic cyclic compound binding;GO:0003824//catalytic activity;GO:0003676//nucleic acid binding	GO:0006399//tRNA metabolic process;GO:0034641//cellular nitrogen compound metabolic process;GO:0009987//cellular process;GO:0090304//nucleic acid metabolic process;GO:0043170//macromolecule metabolic process;GO:0008152//metabolic process;GO:0006139//nucleobase-containing compound metabolic process;GO:0006725//cellular aromatic compound metabolic process;GO:0006807//nitrogen compound metabolic pro…
ENSG00000038945	26	76.3333	0.83	2.29333	1.56619	0.00443502	0.0383753	up	MSR1	-	Cellular Processes	Transport and catabolism	ko04145//Phagosome	K06558	GO:0005576//extracellular region;GO:0043226//organelle;GO:0005615//extracellular space;GO:0016020//membrane;GO:0071944//cell periphery;GO:0005829//cytosol;GO:0043231//intracellular membrane-bounded organelle;GO:0031988//membrane-bounded vesicle;GO:0044464//cell part;GO:0016023//cytoplasmic, membrane-bounded vesicle;GO:0005622//intracellular;GO:0005886//plasma membrane;GO:0043227//membrane-bounded…	GO:0004871//signal transducer activity;GO:0001071//nucleic acid binding transcription factor activity;GO:0003674//molecular_function	GO:0051234//establishment of localization;GO:0051179//localization;GO:0007165//signal transduction;GO:0023052//signaling;GO:0065007//biological regulation;GO:0044763//single-organism cellular process;GO:0007154//cell communication;GO:0008150//biological_process;GO:0051716//cellular response to stimulus;GO:0016192//vesicle-mediated transport;GO:0044699//single-organism process;GO:0050794//regulati…
ENSG00000039987	6.66667	0	0.206667	0.001	-5.72597	0.000228097	0.00751722	down	BEST2	bestrophin 2 [Source:HGNC Symbol;Acc:17107]	Organismal Systems	Digestive system	ko04970//Salivary secretion	K13879	GO:0005929//cilium;GO:0005623//cell;GO:0005575//cellular_component;GO:0043226//organelle;GO:0032991//macromolecular complex;GO:0042995//cell projection;GO:0071944//cell periphery;GO:0016020//membrane;GO:0044464//cell part;GO:0043234//protein complex;GO:0005886//plasma membrane	GO:0005215//transporter activity;GO:0003674//molecular_function;GO:0022857//transmembrane transporter activity	GO:0050877//neurological system process;GO:0032501//multicellular organismal process;GO:0003008//system process;GO:0008150//biological_process
ENSG00000041988	1586.91	266.813	45.3267	15.0667	-2.48144	0.00034006	0.00906143	down	THAP3	THAP domain containing, apoptosis associated protein 3 [Source:HGNC Symbol;Acc:20855]	-	-	-	-	-	GO:0003677//DNA binding;GO:0043167//ion binding;GO:0003674//molecular_function;GO:0005488//binding;GO:0097159//organic cyclic compound binding;GO:0003676//nucleic acid binding;GO:1901363//heterocyclic compound binding	-
ENSG00000042493	7277.67	2642.67	325.127	153.703	-1.40872	0.00398654	0.0359743	down	CAPG	capping protein (actin filament), gelsolin-like [Source:HGNC Symbol;Acc:1474]	-	-	-	-	GO:0031975//envelope;GO:0043234//protein complex;GO:0044428//nuclear part;GO:0031974//membrane-enclosed lumen;GO:0044422//organelle part;GO:0005634//nucleus;GO:0005730//nucleolus;GO:0031988//membrane-bounded vesicle;GO:0097708//intracellular vesicle;GO:0031981//nuclear lumen;GO:0005856//cytoskeleton;GO:0005623//cell;GO:0044424//intracellular part;GO:0043228//non-membrane-bounded organelle;GO:0012…	GO:0005515//protein binding;GO:0005488//binding;GO:0008092//cytoskeletal protein binding;GO:0003674//molecular_function	GO:0065003//macromolecular complex assembly;GO:0070271//protein complex biogenesis;GO:0044085//cellular component biogenesis;GO:0006461//protein complex assembly;GO:0043933//macromolecular complex subunit organization;GO:0022607//cellular component assembly;GO:0016043//cellular component organization;GO:0071822//protein complex subunit organization;GO:0071840//cellular component organization or b…
ENSG00000042753	4815.67	924.667	477.753	105.273	-2.3126	0.000147392	0.00584818	down	AP2S1	adaptor-related protein complex 2, sigma 1 subunit [Source:HGNC Symbol;Acc:565]	Organismal Systems;Cellular Processes;Human Diseases	Nervous system;Excretory system;Transport and catabolism;Neurodegenerative diseases	ko04144//Endocytosis;ko05016//Huntington's disease;ko04721//Synaptic vesicle cycle;ko04961//Endocrine and other factor-regulated calcium reabsorption	K11827	GO:0043226//organelle;GO:0043231//intracellular membrane-bounded organelle;GO:0016023//cytoplasmic, membrane-bounded vesicle;GO:0044464//cell part;GO:0044424//intracellular part;GO:0097708//intracellular vesicle;GO:0005622//intracellular;GO:0043229//intracellular organelle;GO:0043234//protein complex;GO:0044444//cytoplasmic part;GO:0005886//plasma membrane;GO:0005623//cell;GO:0031410//cytoplasmic…	GO:0008565//protein transporter activity;GO:0022892//substrate-specific transporter activity;GO:0005215//transporter activity;GO:0003674//molecular_function	GO:0006810//transport;GO:0044767//single-organism developmental process;GO:0044403//symbiosis, encompassing mutualism through parasitism;GO:0051704//multi-organism process;GO:0065007//biological regulation;GO:0050877//neurological system process;GO:0022607//cellular component assembly;GO:0032989//cellular component morphogenesis;GO:0050794//regulation of cellular process;GO:0007154//cell communic…
ENSG00000046604	3581.57	9893.34	31.63	96.51	1.48471	0.00458969	0.0392826	up	DSG2	desmoglein 2 [Source:HGNC Symbol;Acc:3049]	Human Diseases	Cardiovascular diseases	ko05412//Arrhythmogenic right ventricular cardiomyopathy (ARVC)	K07597	GO:0016020//membrane;GO:0071944//cell periphery;GO:0005623//cell;GO:0005575//cellular_component;GO:0005886//plasma membrane;GO:0044464//cell part	GO:0003674//molecular_function;GO:0005488//binding;GO:0043167//ion binding	GO:0022610//biological adhesion;GO:0009987//cellular process;GO:0008219//cell death;GO:0007155//cell adhesion;GO:0044763//single-organism cellular process;GO:0008150//biological_process;GO:0044699//single-organism process
ENSG00000046653	7.66667	32	0.113333	0.496667	2.05674	0.00516299	0.0422687	up	GPM6B	glycoprotein M6B [Source:HGNC Symbol;Acc:4461]	-	-	-	-	GO:0005623//cell;GO:0071944//cell periphery;GO:0005886//plasma membrane;GO:0005575//cellular_component;GO:0044464//cell part;GO:0016020//membrane	GO:0003674//molecular_function	GO:0044699//single-organism process;GO:0022607//cellular component assembly;GO:0044085//cellular component biogenesis;GO:0044767//single-organism developmental process;GO:0044763//single-organism cellular process;GO:0051179//localization;GO:0048869//cellular developmental process;GO:0071840//cellular component organization or biogenesis;GO:0043062//extracellular structure organization;GO:0030198/…
ENSG00000046889	86.6667	317.333	1.62	2.51333	1.88962	0.000290082	0.00853771	up	PREX2	phosphatidylinositol-3,4,5-trisphosphate-dependent Rac exchange factor 2 [Source:HGNC Symbol;Acc:22950]	-	-	-	-	-	GO:0003674//molecular_function;GO:0098772//molecular function regulator;GO:0030234//enzyme regulator activity	GO:0008150//biological_process;GO:0044700//single organism signaling;GO:0007165//signal transduction;GO:0023052//signaling;GO:0044763//single-organism cellular process;GO:0050896//response to stimulus;GO:0050794//regulation of cellular process;GO:0050789//regulation of biological process;GO:0044699//single-organism process;GO:0009987//cellular process;GO:0051716//cellular response to stimulus;GO:…
ENSG00000047410	2616.99	6054	19.2833	42.4267	1.24039	0.00662836	0.04887	up	TPR	-	Genetic Information Processing;Human Diseases	Translation;Cancers	ko05200//Pathways in cancer;ko03013//RNA transport;ko05216//Thyroid cancer	K09291	GO:0005575//cellular_component;GO:0005635//nuclear envelope;GO:0043227//membrane-bounded organelle;GO:0031974//membrane-enclosed lumen;GO:0044446//intracellular organelle part;GO:0005856//cytoskeleton;GO:0005654//nucleoplasm;GO:0005623//cell;GO:0005737//cytoplasm;GO:0031967//organelle envelope;GO:0005694//chromosome;GO:0043231//intracellular membrane-bounded organelle;GO:0043234//protein complex;…	GO:0005488//binding;GO:0003824//catalytic activity;GO:0008092//cytoskeletal protein binding;GO:0097159//organic cyclic compound binding;GO:0003729//mRNA binding;GO:0044822//poly(A) RNA binding;GO:0003723//RNA binding;GO:0043167//ion binding;GO:0016874//ligase activity;GO:0019899//enzyme binding;GO:0003676//nucleic acid binding;GO:0005515//protein binding;GO:0003674//molecular_function;GO:1901363/…	GO:0007067//mitotic nuclear division;GO:0050789//regulation of biological process;GO:0000280//nuclear division;GO:0019538//protein metabolic process;GO:0044267//cellular protein metabolic process;GO:0071840//cellular component organization or biogenesis;GO:0016043//cellular component organization;GO:0006807//nitrogen compound metabolic process;GO:1901566//organonitrogen compound biosynthetic proc…
ENSG00000048028	778	1815.67	11.67	33.1633	1.24661	0.0025095	0.0278726	up	USP28	-	-	-	-	-	GO:0005575//cellular_component;GO:0044446//intracellular organelle part;GO:0031974//membrane-enclosed lumen;GO:0043226//organelle;GO:0032991//macromolecular complex;GO:0043233//organelle lumen;GO:0043227//membrane-bounded organelle;GO:0043229//intracellular organelle;GO:0044422//organelle part;GO:0005622//intracellular;GO:0044424//intracellular part;GO:0005654//nucleoplasm;GO:0005623//cell;GO:004…	GO:0016787//hydrolase activity;GO:0003674//molecular_function;GO:0008233//peptidase activity;GO:0003824//catalytic activity	GO:0006950//response to stress;GO:0046483//heterocycle metabolic process;GO:0071704//organic substance metabolic process;GO:0050794//regulation of cellular process;GO:0034641//cellular nitrogen compound metabolic process;GO:0006807//nitrogen compound metabolic process;GO:0008219//cell death;GO:0006259//DNA metabolic process;GO:0036211//protein modification process;GO:0044699//single-organism proc…
ENSG00000048162	948.197	286.44	51.4033	19.9167	-1.68024	4.79019e-05	0.00323882	down	NOP16	-	-	-	-	-	GO:0044428//nuclear part;GO:0005575//cellular_component;GO:0005634//nucleus;GO:0043227//membrane-bounded organelle;GO:0043229//intracellular organelle;GO:0043231//intracellular membrane-bounded organelle;GO:0005622//intracellular;GO:0044424//intracellular part;GO:0043226//organelle;GO:0043228//non-membrane-bounded organelle;GO:0043232//intracellular non-membrane-bounded organelle;GO:0005730//nucl…	-	-
ENSG00000048649	941.333	2214.67	15.3433	29.4467	1.26061	0.00583789	0.0452743	up	RSF1	-	-	-	-	-	GO:0031974//membrane-enclosed lumen;GO:0043226//organelle;GO:0044422//organelle part;GO:0044446//intracellular organelle part;GO:0044464//cell part;GO:0070013//intracellular organelle lumen;GO:0005623//cell;GO:0044428//nuclear part;GO:0044424//intracellular part;GO:0005622//intracellular;GO:0043227//membrane-bounded organelle;GO:0005654//nucleoplasm;GO:0031981//nuclear lumen;GO:0043233//organelle…	GO:0042393//histone binding;GO:0005515//protein binding;GO:0043167//ion binding;GO:0003674//molecular_function;GO:0005488//binding	GO:0070271//protein complex biogenesis;GO:0044260//cellular macromolecule metabolic process;GO:0044238//primary metabolic process;GO:0051276//chromosome organization;GO:0009987//cellular process;GO:0009058//biosynthetic process;GO:0071822//protein complex subunit organization;GO:0022607//cellular component assembly;GO:0006996//organelle organization;GO:0071704//organic substance metabolic process…
ENSG00000049246	711	1704	6.78	17.9733	1.27773	0.00678833	0.0496248	up	PER3	period circadian clock 3 [Source:HGNC Symbol;Acc:8847]	Organismal Systems;Human Diseases	Infectious diseases;Environmental adaptation	ko05168//Herpes simplex infection;ko04713//Circadian entrainment;ko04710//Circadian rhythm	K02633	GO:0043226//organelle;GO:0005622//intracellular;GO:0044464//cell part;GO:0043227//membrane-bounded organelle;GO:0043229//intracellular organelle;GO:0044424//intracellular part;GO:0005737//cytoplasm;GO:0005575//cellular_component;GO:0005634//nucleus;GO:0005623//cell;GO:0043231//intracellular membrane-bounded organelle	GO:0003674//molecular_function;GO:0004871//signal transducer activity	GO:0008150//biological_process;GO:0050789//regulation of biological process;GO:0007154//cell communication;GO:0051716//cellular response to stimulus;GO:0006807//nitrogen compound metabolic process;GO:0034641//cellular nitrogen compound metabolic process;GO:0044763//single-organism cellular process;GO:0050794//regulation of cellular process;GO:0009058//biosynthetic process;GO:0007165//signal trans…
ENSG00000049769	110.333	33	2.05667	0.593333	-1.69504	0.000107016	0.0048848	down	PPP1R3F	-	Organismal Systems	Endocrine system	ko04910//Insulin signaling pathway	K17453	GO:0005575//cellular_component	GO:0005515//protein binding;GO:0005488//binding;GO:0003674//molecular_function;GO:0019899//enzyme binding	GO:0008150//biological_process
ENSG00000050030	48.6667	127.333	0.193333	0.596667	1.4146	0.00136449	0.0193721	up	KIAA2022	KIAA2022 [Source:HGNC Symbol;Acc:29433]	-	-	-	-	GO:0044428//nuclear part;GO:0043227//membrane-bounded organelle;GO:0005575//cellular_component;GO:0070013//intracellular organelle lumen;GO:0043229//intracellular organelle;GO:0044422//organelle part;GO:0000228//nuclear chromosome;GO:0043232//intracellular non-membrane-bounded organelle;GO:0005694//chromosome;GO:0005623//cell;GO:0044464//cell part;GO:0005634//nucleus;GO:0043228//non-membrane-boun…	GO:0016787//hydrolase activity;GO:0016772//transferase activity, transferring phosphorus-containing groups;GO:0016740//transferase activity;GO:0003674//molecular_function;GO:0016779//nucleotidyltransferase activity;GO:0004518//nuclease activity;GO:0016788//hydrolase activity, acting on ester bonds;GO:0003824//catalytic activity	GO:1901575//organic substance catabolic process;GO:0046483//heterocycle metabolic process;GO:0071704//organic substance metabolic process;GO:0090304//nucleic acid metabolic process;GO:0006259//DNA metabolic process;GO:0043170//macromolecule metabolic process;GO:0044238//primary metabolic process;GO:0044237//cellular metabolic process;GO:0044270//cellular nitrogen compound catabolic process;GO:004…
ENSG00000050820	5485.33	2413.33	89.3867	48.03	-1.14559	0.00353183	0.0333075	down	BCAR1	-	Organismal Systems;Cellular Processes;Environmental Information Processing;Human Diseases	Cellular commiunity;Immune system;Signal transduction;Cell motility;Infectious diseases	ko04510//Focal adhesion;ko04810//Regulation of actin cytoskeleton;ko04015//Rap1 signaling pathway;ko04062//Chemokine signaling pathway;ko04670//Leukocyte transendothelial migration;ko05100//Bacterial invasion of epithelial cells	K05726	GO:0005829//cytosol;GO:0005886//plasma membrane;GO:0005575//cellular_component;GO:0071944//cell periphery;GO:0016020//membrane;GO:0044444//cytoplasmic part;GO:0044424//intracellular part;GO:0005623//cell;GO:0044464//cell part;GO:0005622//intracellular;GO:0005737//cytoplasm	GO:0005488//binding;GO:0004871//signal transducer activity;GO:0005515//protein binding;GO:0019899//enzyme binding;GO:0003674//molecular_function	GO:0044763//single-organism cellular process;GO:0006928//movement of cell or subcellular component;GO:0050896//response to stimulus;GO:0022610//biological adhesion;GO:0008150//biological_process;GO:0051301//cell division;GO:0044700//single organism signaling;GO:0050789//regulation of biological process;GO:0051674//localization of cell;GO:0006950//response to stress;GO:0007154//cell communication;…
ENSG00000051128	8505.3	2182.67	292.283	115.71	-1.89148	0.000602927	0.0123682	down	HOMER3	-	Organismal Systems;Environmental Information Processing	Nervous system;Signal transduction	ko04068//FoxO signaling pathway;ko04724//Glutamatergic synapse	K15010	GO:0005886//plasma membrane;GO:0043228//non-membrane-bounded organelle;GO:0005737//cytoplasm;GO:0016020//membrane;GO:0071944//cell periphery;GO:0043229//intracellular organelle;GO:0005622//intracellular;GO:0043232//intracellular non-membrane-bounded organelle;GO:0044424//intracellular part;GO:0044444//cytoplasmic part;GO:0044464//cell part;GO:0005623//cell;GO:0005856//cytoskeleton;GO:0005575//cel…	GO:0003674//molecular_function	GO:0044763//single-organism cellular process;GO:0051641//cellular localization;GO:0046907//intracellular transport;GO:0006886//intracellular protein transport;GO:0051716//cellular response to stimulus;GO:0023052//signaling;GO:0050789//regulation of biological process;GO:0051179//localization;GO:0044700//single organism signaling;GO:0008104//protein localization;GO:0015031//protein transport;GO:00…
ENSG00000051523	4412	725	367.837	85.9467	-2.53236	0.000108691	0.00489504	down	CYBA	cytochrome b-245, alpha polypeptide [Source:HGNC Symbol;Acc:2577]	Organismal Systems;Cellular Processes;Human Diseases	Immune system;Infectious diseases;Development;Transport and catabolism	ko04145//Phagosome;ko04380//Osteoclast differentiation;ko05140//Leishmaniasis;ko04670//Leukocyte transendothelial migration	K08009	GO:0043226//organelle;GO:0031410//cytoplasmic vesicle;GO:0097708//intracellular vesicle;GO:0031982//vesicle;GO:0016023//cytoplasmic, membrane-bounded vesicle;GO:0044444//cytoplasmic part;GO:0005622//intracellular;GO:0005739//mitochondrion;GO:0043234//protein complex;GO:0043227//membrane-bounded organelle;GO:0071944//cell periphery;GO:0005737//cytoplasm;GO:0043229//intracellular organelle;GO:00329…	GO:0005488//binding;GO:0003824//catalytic activity;GO:0043167//ion binding;GO:0016491//oxidoreductase activity;GO:0003674//molecular_function	GO:0003013//circulatory system process;GO:0043933//macromolecular complex subunit organization;GO:0070271//protein complex biogenesis;GO:0065003//macromolecular complex assembly;GO:0008152//metabolic process;GO:0044403//symbiosis, encompassing mutualism through parasitism;GO:0071822//protein complex subunit organization;GO:0044419//interspecies interaction between organisms;GO:0050896//response t…
ENSG00000052126	225.333	648.667	5.20333	10.82	1.54041	0.00339662	0.0329111	up	PLEKHA5	-	-	-	-	-	GO:0044424//intracellular part;GO:0044464//cell part;GO:0005623//cell;GO:0005575//cellular_component;GO:0005622//intracellular;GO:0005737//cytoplasm	GO:0043167//ion binding;GO:0003674//molecular_function;GO:0008289//lipid binding;GO:0005488//binding	GO:0008150//biological_process
ENSG00000052749	825.667	361.333	13.8067	4.89	-1.14573	0.00340259	0.0329111	down	RRP12	ribosomal RNA processing 12 homolog (S. cerevisiae) [Source:HGNC Symbol;Acc:29100]	-	-	-	-	GO:0012505//endomembrane system;GO:0005622//intracellular;GO:0031974//membrane-enclosed lumen;GO:0005634//nucleus;GO:0005730//nucleolus;GO:0044424//intracellular part;GO:0031967//organelle envelope;GO:0044464//cell part;GO:0043226//organelle;GO:0044428//nuclear part;GO:0031981//nuclear lumen;GO:0043231//intracellular membrane-bounded organelle;GO:0043227//membrane-bounded organelle;GO:0044422//or…	GO:0003674//molecular_function	-
ENSG00000052795	180.667	450.667	1.56333	3.89	1.3376	0.00512161	0.0421017	up	FNIP2	folliculin interacting protein 2 [Source:HGNC Symbol;Acc:29280]	-	-	-	-	GO:0005634//nucleus;GO:0043226//organelle;GO:0044464//cell part;GO:0005623//cell;GO:0043227//membrane-bounded organelle;GO:0043231//intracellular membrane-bounded organelle;GO:0005886//plasma membrane;GO:0005737//cytoplasm;GO:0044424//intracellular part;GO:0005575//cellular_component;GO:0016020//membrane;GO:0005622//intracellular;GO:0071944//cell periphery;GO:0043229//intracellular organelle	GO:0003674//molecular_function	GO:0044763//single-organism cellular process;GO:0009987//cellular process;GO:0050794//regulation of cellular process;GO:0044700//single organism signaling;GO:0043412//macromolecule modification;GO:0044237//cellular metabolic process;GO:0051716//cellular response to stimulus;GO:0007154//cell communication;GO:0006950//response to stress;GO:0050896//response to stimulus;GO:0044699//single-organism p…
ENSG00000053372	3959.71	1214.33	84.1767	33.2533	-1.65902	0.0001779	0.00657655	down	MRTO4	mRNA turnover 4 homolog (S. cerevisiae) [Source:HGNC Symbol;Acc:18477]	-	-	-	-	GO:0005730//nucleolus;GO:0070013//intracellular organelle lumen;GO:0031975//envelope;GO:0005635//nuclear envelope;GO:0044446//intracellular organelle part;GO:0043227//membrane-bounded organelle;GO:0005634//nucleus;GO:0005575//cellular_component;GO:0005622//intracellular;GO:0043233//organelle lumen;GO:0012505//endomembrane system;GO:0044464//cell part;GO:0044428//nuclear part;GO:0031974//membrane-…	-	GO:0042254//ribosome biogenesis;GO:0044085//cellular component biogenesis;GO:0022613//ribonucleoprotein complex biogenesis;GO:0071840//cellular component organization or biogenesis;GO:0008150//biological_process
ENSG00000053501	918.667	283.667	79.8267	36.8467	-1.63925	0.0016239	0.0214887	down	USE1	unconventional SNARE in the ER 1 homolog (S. cerevisiae) [Source:HGNC Symbol;Acc:30882]	Genetic Information Processing	Folding, sorting and degradation	ko04130//SNARE interactions in vesicular transport	K08507	GO:0044424//intracellular part;GO:0043226//organelle;GO:0044464//cell part;GO:0005623//cell;GO:0012505//endomembrane system;GO:0005622//intracellular;GO:0044444//cytoplasmic part;GO:0005783//endoplasmic reticulum;GO:0043227//membrane-bounded organelle;GO:0005737//cytoplasm;GO:0043231//intracellular membrane-bounded organelle;GO:0005575//cellular_component;GO:0043229//intracellular organelle	GO:0003674//molecular_function	GO:0009056//catabolic process;GO:0006810//transport;GO:0008152//metabolic process;GO:0007034//vacuolar transport;GO:0051234//establishment of localization;GO:0008150//biological_process;GO:0051179//localization
ENSG00000054148	1851.67	489	131.62	43.2933	-1.84282	0.00257737	0.0282727	down	PHPT1	phosphohistidine phosphatase 1 [Source:HGNC Symbol;Acc:30033]	-	-	-	-	GO:0005829//cytosol;GO:0005622//intracellular;GO:0044464//cell part;GO:0044444//cytoplasmic part;GO:0044424//intracellular part;GO:0005737//cytoplasm;GO:0005623//cell;GO:0005575//cellular_component	GO:0042578//phosphoric ester hydrolase activity;GO:0003674//molecular_function;GO:0016791//phosphatase activity;GO:0003824//catalytic activity;GO:0016787//hydrolase activity;GO:0016788//hydrolase activity, acting on ester bonds	GO:0043412//macromolecule modification;GO:0043170//macromolecule metabolic process;GO:0008150//biological_process;GO:0044238//primary metabolic process;GO:0036211//protein modification process;GO:0044267//cellular protein metabolic process;GO:0008152//metabolic process;GO:0006464//cellular protein modification process;GO:0044260//cellular macromolecule metabolic process;GO:0009987//cellular proce…
ENSG00000054690	72.44	208.053	1.37667	3.22667	1.5395	0.000547027	0.0116166	up	PLEKHH1	pleckstrin homology domain containing, family H (with MyTH4 domain) member 1 [Source:HGNC Symbol;Acc:17733]	-	-	-	-	GO:0043226//organelle;GO:0044464//cell part;GO:0044424//intracellular part;GO:0005856//cytoskeleton;GO:0043229//intracellular organelle;GO:0005575//cellular_component;GO:0043228//non-membrane-bounded organelle;GO:0043232//intracellular non-membrane-bounded organelle;GO:0005623//cell;GO:0005622//intracellular	-	-
ENSG00000054793	341	751.667	2.23667	5.26	1.16185	0.00512396	0.0421017	up	ATP9A	ATPase, class II, type 9A [Source:HGNC Symbol;Acc:13540]	-	-	-	-	GO:0043227//membrane-bounded organelle;GO:0005794//Golgi apparatus;GO:0044464//cell part;GO:0005623//cell;GO:0044424//intracellular part;GO:0043226//organelle;GO:0005773//vacuole;GO:0012505//endomembrane system;GO:0043229//intracellular organelle;GO:0005575//cellular_component;GO:0043231//intracellular membrane-bounded organelle;GO:0005768//endosome;GO:0005737//cytoplasm;GO:0044444//cytoplasmic p…	GO:0017111//nucleoside-triphosphatase activity;GO:0022857//transmembrane transporter activity;GO:0003674//molecular_function;GO:0016887//ATPase activity;GO:0016817//hydrolase activity, acting on acid anhydrides;GO:0016462//pyrophosphatase activity;GO:0016818//hydrolase activity, acting on acid anhydrides, in phosphorus-containing anhydrides;GO:0005488//binding;GO:0005215//transporter activity;GO:…	GO:0009987//cellular process;GO:0051234//establishment of localization;GO:0006810//transport;GO:0016043//cellular component organization;GO:0071840//cellular component organization or biogenesis;GO:0051179//localization;GO:0061024//membrane organization;GO:0008150//biological_process
ENSG00000058668	1014.33	2486	7.78	16.1	1.31756	0.00258031	0.0282727	up	ATP2B4	ATPase, Ca++ transporting, plasma membrane 4 [Source:HGNC Symbol;Acc:817]	Organismal Systems;Environmental Information Processing	Signal transduction;Digestive system;Circulatory system	ko04024//cAMP signaling pathway;ko04020//Calcium signaling pathway;ko04022//cGMP - PKG signaling pathway;ko04261//Adrenergic signaling in cardiomyocytes;ko04970//Salivary secretion;ko04972//Pancreatic secretion	K05850	GO:0016020//membrane;GO:0032991//macromolecular complex;GO:0071944//cell periphery;GO:0044464//cell part;GO:0005886//plasma membrane;GO:0005575//cellular_component;GO:0005623//cell;GO:0043234//protein complex	GO:0003674//molecular_function;GO:0043167//ion binding;GO:0016818//hydrolase activity, acting on acid anhydrides, in phosphorus-containing anhydrides;GO:0016817//hydrolase activity, acting on acid anhydrides;GO:0005488//binding;GO:0003824//catalytic activity;GO:0016787//hydrolase activity;GO:0022857//transmembrane transporter activity;GO:0005215//transporter activity;GO:0016462//pyrophosphatase a…	GO:0006810//transport;GO:0050896//response to stimulus;GO:0006950//response to stress;GO:0055085//transmembrane transport;GO:0051179//localization;GO:0008150//biological_process;GO:0051234//establishment of localization
ENSG00000062370	42.6667	147	0.62	2.95667	1.79073	0.000206065	0.00714242	up	ZNF112	zinc finger protein 112 [Source:HGNC Symbol;Acc:12892]	-	-	-	-	GO:0044464//cell part;GO:0043227//membrane-bounded organelle;GO:0043231//intracellular membrane-bounded organelle;GO:0005575//cellular_component;GO:0043226//organelle;GO:0005622//intracellular;GO:0005623//cell;GO:0005634//nucleus;GO:0043229//intracellular organelle;GO:0044424//intracellular part	GO:0005488//binding;GO:0097159//organic cyclic compound binding;GO:1901363//heterocyclic compound binding;GO:0003674//molecular_function;GO:0043167//ion binding;GO:0003677//DNA binding;GO:0003676//nucleic acid binding	GO:0006807//nitrogen compound metabolic process;GO:0034641//cellular nitrogen compound metabolic process;GO:0008150//biological_process;GO:0009987//cellular process;GO:0008152//metabolic process;GO:0009058//biosynthetic process;GO:0044237//cellular metabolic process
ENSG00000062582	2862.56	644.067	310.107	101.067	-2.08765	0.000142192	0.00578131	down	MRPS24	-	-	-	-	-	GO:0043226//organelle;GO:0043229//intracellular organelle;GO:0005575//cellular_component;GO:0043231//intracellular membrane-bounded organelle;GO:0005739//mitochondrion;GO:0005622//intracellular;GO:0005737//cytoplasm;GO:0005623//cell;GO:0044424//intracellular part;GO:0005840//ribosome;GO:0043232//intracellular non-membrane-bounded organelle;GO:0032991//macromolecular complex;GO:1990904//ribonucleo…	GO:0005198//structural molecule activity;GO:0003674//molecular_function;GO:0003735//structural constituent of ribosome	GO:0009058//biosynthetic process;GO:0034641//cellular nitrogen compound metabolic process;GO:1901576//organic substance biosynthetic process;GO:0044271//cellular nitrogen compound biosynthetic process;GO:0043603//cellular amide metabolic process;GO:0044260//cellular macromolecule metabolic process;GO:0034645//cellular macromolecule biosynthetic process;GO:0044238//primary metabolic process;GO:000…
ENSG00000063177	25260	4999.67	2555.68	670.923	-2.26941	8.53865e-05	0.00436727	down	RPL18	ribosomal protein L18 [Source:HGNC Symbol;Acc:10310]	Genetic Information Processing	Translation	ko03010//Ribosome	K02883	GO:0044464//cell part;GO:0005829//cytosol;GO:0043228//non-membrane-bounded organelle;GO:0030529//intracellular ribonucleoprotein complex;GO:0005623//cell;GO:0005737//cytoplasm;GO:0005575//cellular_component;GO:0043226//organelle;GO:1990904//ribonucleoprotein complex;GO:0005840//ribosome;GO:0044444//cytoplasmic part;GO:0043229//intracellular organelle;GO:0044424//intracellular part;GO:0032991//mac…	GO:0003723//RNA binding;GO:0003674//molecular_function;GO:0097159//organic cyclic compound binding;GO:1901363//heterocyclic compound binding;GO:0005488//binding;GO:0005198//structural molecule activity;GO:0003735//structural constituent of ribosome;GO:0003676//nucleic acid binding	GO:0051234//establishment of localization;GO:0006518//peptide metabolic process;GO:0006810//transport;GO:0015031//protein transport;GO:0019538//protein metabolic process;GO:0044271//cellular nitrogen compound biosynthetic process;GO:0044237//cellular metabolic process;GO:0006725//cellular aromatic compound metabolic process;GO:0008150//biological_process;GO:0044267//cellular protein metabolic pro…
ENSG00000063180	117.333	36.3333	4.55667	1.31	-1.62437	0.00410451	0.0366438	down	CA11	-	-	-	-	-	GO:0005575//cellular_component;GO:0044464//cell part;GO:0071944//cell periphery;GO:0005576//extracellular region;GO:0005623//cell;GO:0005886//plasma membrane;GO:0016020//membrane	-	-
ENSG00000063241	996.333	229	49.5067	16.2967	-2.05934	0.000466942	0.0106784	down	ISOC2	isochorismatase domain containing 2 [Source:HGNC Symbol;Acc:26278]	-	-	-	-	GO:0005739//mitochondrion;GO:0005623//cell;GO:0043231//intracellular membrane-bounded organelle;GO:0044464//cell part;GO:0005622//intracellular;GO:0043229//intracellular organelle;GO:0043227//membrane-bounded organelle;GO:0005737//cytoplasm;GO:0005634//nucleus;GO:0005575//cellular_component;GO:0043226//organelle;GO:0044444//cytoplasmic part;GO:0044424//intracellular part	GO:0003674//molecular_function	GO:0008150//biological_process
ENSG00000064489	414.473	154.75	14.2367	8.52333	-1.38445	0.00185308	0.0233712	down	MEF2BNB-MEF2B	MEF2BNB-MEF2B readthrough [Source:HGNC Symbol;Acc:39979]	Environmental Information Processing	Signal transduction	ko04022//cGMP - PKG signaling pathway	K09261	GO:0043234//protein complex;GO:0043229//intracellular organelle;GO:0043226//organelle;GO:0005575//cellular_component;GO:0032991//macromolecular complex;GO:0044424//intracellular part;GO:0044464//cell part;GO:0043231//intracellular membrane-bounded organelle;GO:0005634//nucleus;GO:0043227//membrane-bounded organelle;GO:0005622//intracellular;GO:0005623//cell	GO:0019899//enzyme binding;GO:1901363//heterocyclic compound binding;GO:0003674//molecular_function;GO:0003676//nucleic acid binding;GO:0005488//binding;GO:0097159//organic cyclic compound binding;GO:0005515//protein binding;GO:0001071//nucleic acid binding transcription factor activity;GO:0003677//DNA binding	GO:0008152//metabolic process;GO:0034641//cellular nitrogen compound metabolic process;GO:0009987//cellular process;GO:0006807//nitrogen compound metabolic process;GO:0048856//anatomical structure development;GO:0009058//biosynthetic process;GO:0008150//biological_process;GO:0032502//developmental process;GO:0044237//cellular metabolic process
ENSG00000064490	2961.7	702.14	195.37	61.43	-2.00932	0.000376385	0.00944512	down	RFXANK	regulatory factor X-associated ankyrin-containing protein [Source:HGNC Symbol;Acc:9987]	Organismal Systems;Human Diseases	Immune diseases;Immune system;Infectious diseases	ko05152//Tuberculosis;ko04612//Antigen processing and presentation;ko05340//Primary immunodeficiency	K08062	GO:0044464//cell part;GO:0005634//nucleus;GO:0005737//cytoplasm;GO:0005622//intracellular;GO:0043229//intracellular organelle;GO:0005575//cellular_component;GO:0043226//organelle;GO:0005623//cell;GO:0044424//intracellular part;GO:0043227//membrane-bounded organelle;GO:0043231//intracellular membrane-bounded organelle	GO:0097159//organic cyclic compound binding;GO:0000988//transcription factor activity, protein binding;GO:0019899//enzyme binding;GO:0003677//DNA binding;GO:1901363//heterocyclic compound binding;GO:0005515//protein binding;GO:0003674//molecular_function;GO:0003676//nucleic acid binding;GO:0001071//nucleic acid binding transcription factor activity;GO:0005488//binding	GO:0009987//cellular process;GO:0044699//single-organism process;GO:0044237//cellular metabolic process;GO:0050794//regulation of cellular process;GO:0007154//cell communication;GO:0044700//single organism signaling;GO:0023052//signaling;GO:0050789//regulation of biological process;GO:0051716//cellular response to stimulus;GO:0009058//biosynthetic process;GO:0008150//biological_process;GO:0007165…
ENSG00000064545	2253	839.333	77.2167	36.6533	-1.37067	0.00418014	0.0370016	down	TMEM161A	transmembrane protein 161A [Source:HGNC Symbol;Acc:26020]	-	-	-	-	GO:0005575//cellular_component	-	GO:0008150//biological_process;GO:0050896//response to stimulus;GO:0006950//response to stress
ENSG00000065054	1302	371	53.6033	22.02	-1.74919	0.00115356	0.0178235	down	SLC9A3R2	-	Organismal Systems	Excretory system	ko04960//Aldosterone-regulated sodium reabsorption	K13358	GO:0043229//intracellular organelle;GO:0005737//cytoplasm;GO:0005623//cell;GO:0005634//nucleus;GO:0016020//membrane;GO:0043227//membrane-bounded organelle;GO:0005622//intracellular;GO:0043231//intracellular membrane-bounded organelle;GO:0005575//cellular_component;GO:0044464//cell part;GO:0044424//intracellular part;GO:0043226//organelle;GO:0071944//cell periphery;GO:0005886//plasma membrane	GO:0019899//enzyme binding;GO:0005488//binding;GO:0005515//protein binding;GO:0003674//molecular_function	GO:0044085//cellular component biogenesis;GO:0070271//protein complex biogenesis;GO:0065003//macromolecular complex assembly;GO:0009987//cellular process;GO:0006461//protein complex assembly;GO:0071822//protein complex subunit organization;GO:0008150//biological_process;GO:0071840//cellular component organization or biogenesis;GO:0016043//cellular component organization;GO:0043933//macromolecular…
ENSG00000065057	934.333	177	51.3767	13.5433	-2.33298	8.1801e-05	0.0042652	down	NTHL1	-	Genetic Information Processing	Replication and repair	ko03410//Base excision repair	K10773	GO:0005623//cell;GO:0043227//membrane-bounded organelle;GO:0044424//intracellular part;GO:0005739//mitochondrion;GO:0044444//cytoplasmic part;GO:0005634//nucleus;GO:0031974//membrane-enclosed lumen;GO:0043233//organelle lumen;GO:0043226//organelle;GO:0044446//intracellular organelle part;GO:0005622//intracellular;GO:0044464//cell part;GO:0031981//nuclear lumen;GO:0044428//nuclear part;GO:0043229/…	GO:0005488//binding;GO:0097159//organic cyclic compound binding;GO:0004518//nuclease activity;GO:0043167//ion binding;GO:0003824//catalytic activity;GO:0016798//hydrolase activity, acting on glycosyl bonds;GO:0016788//hydrolase activity, acting on ester bonds;GO:1901363//heterocyclic compound binding;GO:0003676//nucleic acid binding;GO:0016829//lyase activity;GO:0016787//hydrolase activity;GO:000…	GO:0044238//primary metabolic process;GO:0006807//nitrogen compound metabolic process;GO:0044248//cellular catabolic process;GO:0044237//cellular metabolic process;GO:0044281//small molecule metabolic process;GO:0044260//cellular macromolecule metabolic process;GO:0006259//DNA metabolic process;GO:0090304//nucleic acid metabolic process;GO:0046483//heterocycle metabolic process;GO:0044699//single…
ENSG00000065268	4573	1164.67	155.243	55.45	-1.90188	0.000756437	0.0138384	down	WDR18	-	-	-	-	-	GO:0044428//nuclear part;GO:0005623//cell;GO:0044422//organelle part;GO:0043226//organelle;GO:0031974//membrane-enclosed lumen;GO:0043227//membrane-bounded organelle;GO:0043231//intracellular membrane-bounded organelle;GO:0005575//cellular_component;GO:0005634//nucleus;GO:0043233//organelle lumen;GO:0044464//cell part;GO:0070013//intracellular organelle lumen;GO:0043229//intracellular organelle;G…	GO:0003674//molecular_function	GO:0008150//biological_process
ENSG00000065621	86	27.6667	4.61	1.65333	-1.58541	0.00499599	0.0414075	down	GSTO2	glutathione S-transferase omega 2 [Source:HGNC Symbol;Acc:23064]	Metabolism;Human Diseases	Xenobiotics biodegradation and metabolism;Cancers;Metabolism of other amino acids	ko05204//Chemical carcinogenesis;ko00980//Metabolism of xenobiotics by cytochrome P450;ko00982//Drug metabolism - cytochrome P450;ko00480//Glutathione metabolism	K00799	GO:0005575//cellular_component;GO:0044424//intracellular part;GO:0005622//intracellular;GO:0044464//cell part;GO:0005623//cell;GO:0005829//cytosol;GO:0044444//cytoplasmic part;GO:0005737//cytoplasm	GO:0016491//oxidoreductase activity;GO:0016740//transferase activity;GO:0003674//molecular_function;GO:0003824//catalytic activity;GO:0016765//transferase activity, transferring alkyl or aryl (other than methyl) groups	GO:0008152//metabolic process;GO:0009058//biosynthetic process;GO:0044238//primary metabolic process;GO:0065008//regulation of biological quality;GO:0005975//carbohydrate metabolic process;GO:0044710//single-organism metabolic process;GO:0071704//organic substance metabolic process;GO:0008150//biological_process;GO:0044281//small molecule metabolic process;GO:0042592//homeostatic process;GO:00650…
ENSG00000066336	15.3333	1	0.603333	0.0733333	-3.71377	0.00125441	0.0185752	down	SPI1	-	Organismal Systems;Human Diseases	Development;Infectious diseases;Cancers	ko05200//Pathways in cancer;ko05166//HTLV-I infection;ko05169//Epstein-Barr virus infection;ko05202//Transcriptional misregulation in cancers;ko04380//Osteoclast differentiation;ko05221//Acute myeloid leukemia	K09438	GO:0043233//organelle lumen;GO:0000228//nuclear chromosome;GO:0005623//cell;GO:0043229//intracellular organelle;GO:0043231//intracellular membrane-bounded organelle;GO:0031981//nuclear lumen;GO:0005694//chromosome;GO:0043232//intracellular non-membrane-bounded organelle;GO:0043227//membrane-bounded organelle;GO:0043228//non-membrane-bounded organelle;GO:0005622//intracellular;GO:0044422//organell…	GO:1901363//heterocyclic compound binding;GO:0003676//nucleic acid binding;GO:0003723//RNA binding;GO:0005488//binding;GO:0001071//nucleic acid binding transcription factor activity;GO:0008134//transcription factor binding;GO:0005515//protein binding;GO:0003677//DNA binding;GO:0097159//organic cyclic compound binding;GO:0003674//molecular_function	GO:0006464//cellular protein modification process;GO:0048869//cellular developmental process;GO:0008152//metabolic process;GO:0044267//cellular protein metabolic process;GO:0071704//organic substance metabolic process;GO:0009987//cellular process;GO:0044237//cellular metabolic process;GO:0030154//cell differentiation;GO:0048856//anatomical structure development;GO:0043170//macromolecule metabolic…
ENSG00000066379	313	105.333	26.3633	11.5067	-1.51615	0.00272859	0.0290573	down	ZNRD1	zinc ribbon domain containing 1 [Source:HGNC Symbol;Acc:13182]	Genetic Information Processing;Metabolism	Nucleotide metabolism;Transcription	ko00230//Purine metabolism;ko00240//Pyrimidine metabolism;ko03020//RNA polymerase	K03000	GO:0044424//intracellular part;GO:0043229//intracellular organelle;GO:0043232//intracellular non-membrane-bounded organelle;GO:0005575//cellular_component;GO:0031981//nuclear lumen;GO:0044422//organelle part;GO:0005634//nucleus;GO:0043228//non-membrane-bounded organelle;GO:0043231//intracellular membrane-bounded organelle;GO:0043227//membrane-bounded organelle;GO:0070013//intracellular organelle …	GO:0003674//molecular_function;GO:0016740//transferase activity;GO:0043167//ion binding;GO:0003824//catalytic activity;GO:0016772//transferase activity, transferring phosphorus-containing groups;GO:0005488//binding;GO:0016779//nucleotidyltransferase activity	GO:0008152//metabolic process;GO:0044237//cellular metabolic process;GO:0006807//nitrogen compound metabolic process;GO:0009987//cellular process;GO:0009058//biosynthetic process;GO:0008150//biological_process;GO:0034641//cellular nitrogen compound metabolic process
ENSG00000066933	848.333	2187.67	4.69333	14.3233	1.38904	0.00636398	0.047521	up	MYO9A	myosin IXA [Source:HGNC Symbol;Acc:7608]	-	-	-	-	GO:0005623//cell;GO:0043228//non-membrane-bounded organelle;GO:0044424//intracellular part;GO:0044464//cell part;GO:0043232//intracellular non-membrane-bounded organelle;GO:0043229//intracellular organelle;GO:0005856//cytoskeleton;GO:0044444//cytoplasmic part;GO:0005737//cytoplasm;GO:0032991//macromolecular complex;GO:0005575//cellular_component;GO:0005829//cytosol;GO:0043234//protein complex;GO:…	GO:0005515//protein binding;GO:0003674//molecular_function;GO:0005488//binding;GO:0098772//molecular function regulator;GO:0043167//ion binding;GO:0008092//cytoskeletal protein binding;GO:0030234//enzyme regulator activity	GO:0044700//single organism signaling;GO:0050789//regulation of biological process;GO:0044699//single-organism process;GO:0008150//biological_process;GO:0050877//neurological system process;GO:0065007//biological regulation;GO:0007165//signal transduction;GO:0032501//multicellular organismal process;GO:0050896//response to stimulus;GO:0050794//regulation of cellular process;GO:0023052//signaling;…
ENSG00000067082	2117.33	4754.33	25.9867	69.4333	1.18293	0.00343476	0.0330147	up	KLF6	Kruppel-like factor 6 [Source:HGNC Symbol;Acc:2235]	-	-	-	-	GO:0043231//intracellular membrane-bounded organelle;GO:0005622//intracellular;GO:0005575//cellular_component;GO:0044464//cell part;GO:0043226//organelle;GO:0044424//intracellular part;GO:0043227//membrane-bounded organelle;GO:0005737//cytoplasm;GO:0005623//cell;GO:0043229//intracellular organelle;GO:0005634//nucleus	GO:0097159//organic cyclic compound binding;GO:0003677//DNA binding;GO:0003676//nucleic acid binding;GO:1901363//heterocyclic compound binding;GO:0043167//ion binding;GO:0003674//molecular_function;GO:0005488//binding	GO:0048856//anatomical structure development;GO:0044699//single-organism process;GO:0048869//cellular developmental process;GO:0009058//biosynthetic process;GO:0023052//signaling;GO:0034641//cellular nitrogen compound metabolic process;GO:0006807//nitrogen compound metabolic process;GO:0065007//biological regulation;GO:0008150//biological_process;GO:0032502//developmental process;GO:0009987//cell…
ENSG00000067221	305	90.6667	8.19	3.08667	-1.69861	0.000368786	0.00937388	down	STOML1	stomatin (EPB72)-like 1 [Source:HGNC Symbol;Acc:14560]	-	-	-	-	GO:0005575//cellular_component	GO:0005488//binding;GO:0008289//lipid binding;GO:0003674//molecular_function	GO:0008150//biological_process
ENSG00000068079	904.333	254.333	40.7367	15.9933	-1.77208	0.000745676	0.0137528	down	IFI35	interferon-induced protein 35 [Source:HGNC Symbol;Acc:5399]	-	-	-	-	GO:0005575//cellular_component;GO:0044464//cell part;GO:0043226//organelle;GO:0005829//cytosol;GO:0043227//membrane-bounded organelle;GO:0005623//cell;GO:0043231//intracellular membrane-bounded organelle;GO:0005622//intracellular;GO:0005737//cytoplasm;GO:0044444//cytoplasmic part;GO:0044424//intracellular part;GO:0043229//intracellular organelle;GO:0005634//nucleus	GO:0003674//molecular_function	GO:0007154//cell communication;GO:0023052//signaling;GO:0044699//single-organism process;GO:0002376//immune system process;GO:0050789//regulation of biological process;GO:0007165//signal transduction;GO:0044700//single organism signaling;GO:0050794//regulation of cellular process;GO:0065007//biological regulation;GO:0006950//response to stress;GO:0009987//cellular process;GO:0044763//single-organ…
ENSG00000068885	272.197	650.167	5.38667	15.83	1.26737	0.00288806	0.0299963	up	IFT80	-	-	-	-	-	GO:0015630//microtubule cytoskeleton;GO:0044424//intracellular part;GO:0043232//intracellular non-membrane-bounded organelle;GO:0044430//cytoskeletal part;GO:0042995//cell projection;GO:0044464//cell part;GO:0005815//microtubule organizing center;GO:0043226//organelle;GO:0043229//intracellular organelle;GO:0005623//cell;GO:0005575//cellular_component;GO:0005737//cytoplasm;GO:0043228//non-membrane…	GO:0003674//molecular_function	GO:0023052//signaling;GO:0044763//single-organism cellular process;GO:0048856//anatomical structure development;GO:0032502//developmental process;GO:0000902//cell morphogenesis;GO:0071840//cellular component organization or biogenesis;GO:0065007//biological regulation;GO:0007154//cell communication;GO:0009653//anatomical structure morphogenesis;GO:0044699//single-organism process;GO:0008150//biol…
ENSG00000068976	140.333	29.6667	2.6	0.613333	-2.18767	4.08485e-07	7.86247e-05	down	PYGM	phosphorylase, glycogen, muscle [Source:HGNC Symbol;Acc:9726]	Organismal Systems;Metabolism;Human Diseases	Endocrine and metabolic diseases;Carbohydrate metabolism;Endocrine system	ko04910//Insulin signaling pathway;ko04931//Insulin resistance;ko04922//Glucagon signaling pathway;ko00500//Starch and sucrose metabolism	K00688	GO:0005575//cellular_component;GO:0005623//cell;GO:0005737//cytoplasm;GO:0044464//cell part;GO:0005829//cytosol;GO:0044424//intracellular part;GO:0005622//intracellular;GO:0044444//cytoplasmic part	GO:0016757//transferase activity, transferring glycosyl groups;GO:0016740//transferase activity;GO:0003674//molecular_function;GO:0005488//binding;GO:0043167//ion binding;GO:0003824//catalytic activity	GO:0005975//carbohydrate metabolic process;GO:0008152//metabolic process;GO:0071704//organic substance metabolic process;GO:0009056//catabolic process;GO:0044699//single-organism process;GO:0009987//cellular process;GO:0044710//single-organism metabolic process;GO:0006091//generation of precursor metabolites and energy;GO:0044237//cellular metabolic process;GO:0008150//biological_process;GO:00442…
ENSG00000069011	613.333	241.333	14.0367	9.86	-1.28104	0.00573824	0.0447895	down	PITX1	paired-like homeodomain 1 [Source:HGNC Symbol;Acc:9004]	-	-	-	-	GO:0044422//organelle part;GO:0005575//cellular_component;GO:0005737//cytoplasm;GO:0044464//cell part;GO:0005622//intracellular;GO:0032991//macromolecular complex;GO:0043228//non-membrane-bounded organelle;GO:0043226//organelle;GO:0043233//organelle lumen;GO:0043227//membrane-bounded organelle;GO:0044424//intracellular part;GO:0070013//intracellular organelle lumen;GO:0043234//protein complex;GO:…	GO:0003674//molecular_function;GO:0003676//nucleic acid binding;GO:1901363//heterocyclic compound binding;GO:0001071//nucleic acid binding transcription factor activity;GO:0097159//organic cyclic compound binding;GO:0005488//binding;GO:0003677//DNA binding;GO:0000988//transcription factor activity, protein binding	GO:0044767//single-organism developmental process;GO:0044707//single-multicellular organism process;GO:0009790//embryo development;GO:0032502//developmental process;GO:0008152//metabolic process;GO:0007275//multicellular organism development;GO:0009987//cellular process;GO:0048856//anatomical structure development;GO:0034641//cellular nitrogen compound metabolic process;GO:0044237//cellular metab…
ENSG00000069667	82.6667	977.667	0.743333	9.65667	3.5766	6.60018e-13	7.46357e-10	up	RORA	RAR-related orphan receptor A [Source:HGNC Symbol;Acc:10258]	Organismal Systems;Human Diseases	Immune diseases;Environmental adaptation	ko05321//Inflammatiory bowel disease (IBD);ko04710//Circadian rhythm	K08532	GO:0044424//intracellular part;GO:0044422//organelle part;GO:0043229//intracellular organelle;GO:0005575//cellular_component;GO:0044446//intracellular organelle part;GO:0005623//cell;GO:0043226//organelle;GO:0043231//intracellular membrane-bounded organelle;GO:0044428//nuclear part;GO:0031974//membrane-enclosed lumen;GO:0005622//intracellular;GO:0031981//nuclear lumen;GO:0043233//organelle lumen;…	GO:0003674//molecular_function;GO:0043167//ion binding;GO:0001071//nucleic acid binding transcription factor activity;GO:1901363//heterocyclic compound binding;GO:0004871//signal transducer activity;GO:0097159//organic cyclic compound binding;GO:0003676//nucleic acid binding;GO:0003677//DNA binding;GO:0005488//binding	GO:0044767//single-organism developmental process;GO:0050896//response to stimulus;GO:0048646//anatomical structure formation involved in morphogenesis;GO:0065007//biological regulation;GO:0050794//regulation of cellular process;GO:0009653//anatomical structure morphogenesis;GO:0007165//signal transduction;GO:0034641//cellular nitrogen compound metabolic process;GO:0044281//small molecule metabol…
ENSG00000069712	8	54.3333	0.0966667	0.686667	2.76396	8.11748e-05	0.00426498	up	KIAA1107	-	-	-	-	-	-	-	-
ENSG00000070182	56.4233	127.487	0.516667	0.88	1.20747	0.00656841	0.0485863	up	SPTB	spectrin, beta, erythrocytic [Source:HGNC Symbol;Acc:11274]	-	-	-	-	GO:0043228//non-membrane-bounded organelle;GO:0005623//cell;GO:0071944//cell periphery;GO:0005886//plasma membrane;GO:0005575//cellular_component;GO:0005737//cytoplasm;GO:0032991//macromolecular complex;GO:0005856//cytoskeleton;GO:0044464//cell part;GO:0005622//intracellular;GO:0044424//intracellular part;GO:0043229//intracellular organelle;GO:0043232//intracellular non-membrane-bounded organelle…	GO:0005198//structural molecule activity;GO:0008092//cytoskeletal protein binding;GO:0005488//binding;GO:0005515//protein binding;GO:0003674//molecular_function	GO:0010256//endomembrane system organization;GO:0051186//cofactor metabolic process;GO:0032502//developmental process;GO:0007009//plasma membrane organization;GO:0034641//cellular nitrogen compound metabolic process;GO:0048856//anatomical structure development;GO:0061024//membrane organization;GO:0044763//single-organism cellular process;GO:0009653//anatomical structure morphogenesis;GO:0040011//…
ENSG00000070731	885.667	164	6.79	1.72	-2.37218	9.89072e-05	0.00477208	down	ST6GALNAC2	-	-	-	-	-	GO:0043229//intracellular organelle;GO:0043226//organelle;GO:0044424//intracellular part;GO:0012505//endomembrane system;GO:0043227//membrane-bounded organelle;GO:0043231//intracellular membrane-bounded organelle;GO:0005622//intracellular;GO:0005623//cell;GO:0005575//cellular_component;GO:0005737//cytoplasm;GO:0005794//Golgi apparatus;GO:0044464//cell part;GO:0044444//cytoplasmic part	GO:0016740//transferase activity;GO:0003674//molecular_function;GO:0003824//catalytic activity;GO:0016757//transferase activity, transferring glycosyl groups	GO:0044238//primary metabolic process;GO:0044267//cellular protein metabolic process;GO:0019538//protein metabolic process;GO:0008150//biological_process;GO:0043412//macromolecule modification;GO:0006464//cellular protein modification process;GO:0071704//organic substance metabolic process;GO:0036211//protein modification process;GO:0008152//metabolic process;GO:0043170//macromolecule metabolic p…
ENSG00000071082	7313.67	2362	1627.22	1111.85	-1.5875	0.00159719	0.0213231	down	RPL31	ribosomal protein L31 [Source:HGNC Symbol;Acc:10334]	Genetic Information Processing	Translation	ko03010//Ribosome	K02910	GO:0044464//cell part;GO:0005622//intracellular;GO:0043229//intracellular organelle;GO:0043228//non-membrane-bounded organelle;GO:0005575//cellular_component;GO:1990904//ribonucleoprotein complex;GO:0044444//cytoplasmic part;GO:0044424//intracellular part;GO:0005737//cytoplasm;GO:0030529//intracellular ribonucleoprotein complex;GO:0043232//intracellular non-membrane-bounded organelle;GO:0043226//…	GO:0003674//molecular_function;GO:0005488//binding;GO:1901363//heterocyclic compound binding;GO:0097159//organic cyclic compound binding;GO:0003676//nucleic acid binding;GO:0003735//structural constituent of ribosome;GO:0005198//structural molecule activity;GO:0003723//RNA binding	GO:0019439//aromatic compound catabolic process;GO:0006886//intracellular protein transport;GO:0034613//cellular protein localization;GO:0008152//metabolic process;GO:0006518//peptide metabolic process;GO:0046700//heterocycle catabolic process;GO:0006807//nitrogen compound metabolic process;GO:0043170//macromolecule metabolic process;GO:0006412//translation;GO:1901564//organonitrogen compound met…
ENSG00000071462	2193.67	817.667	110.527	54.7	-1.38168	0.00156216	0.0210266	down	WBSCR22	-	-	-	-	-	GO:0005622//intracellular;GO:0005575//cellular_component;GO:0005623//cell;GO:0043226//organelle;GO:0043227//membrane-bounded organelle;GO:0043231//intracellular membrane-bounded organelle;GO:0044464//cell part;GO:0043229//intracellular organelle;GO:0044424//intracellular part;GO:0005634//nucleus	GO:0016740//transferase activity;GO:0003674//molecular_function;GO:0003824//catalytic activity;GO:0016741//transferase activity, transferring one-carbon groups;GO:0008168//methyltransferase activity	GO:0008152//metabolic process;GO:0034641//cellular nitrogen compound metabolic process;GO:0008150//biological_process;GO:0009987//cellular process;GO:0044237//cellular metabolic process;GO:0022613//ribonucleoprotein complex biogenesis;GO:0071840//cellular component organization or biogenesis;GO:0006807//nitrogen compound metabolic process;GO:0044085//cellular component biogenesis;GO:0042254//ribo…
ENSG00000071655	14118.8	3925.53	253.49	97.42	-1.77994	0.000881223	0.0151847	down	MBD3	methyl-CpG binding domain protein 3 [Source:HGNC Symbol;Acc:6918]	-	-	-	-	GO:0032991//macromolecular complex;GO:0044464//cell part;GO:0043226//organelle;GO:0031974//membrane-enclosed lumen;GO:0044446//intracellular organelle part;GO:0005575//cellular_component;GO:0005634//nucleus;GO:0043228//non-membrane-bounded organelle;GO:0005622//intracellular;GO:0043232//intracellular non-membrane-bounded organelle;GO:0043233//organelle lumen;GO:0044422//organelle part;GO:0043229/…	GO:1901363//heterocyclic compound binding;GO:0005488//binding;GO:0003674//molecular_function;GO:0003677//DNA binding;GO:0097159//organic cyclic compound binding;GO:0003676//nucleic acid binding	GO:0071704//organic substance metabolic process;GO:0043412//macromolecule modification;GO:0008150//biological_process;GO:0009790//embryo development;GO:0048856//anatomical structure development;GO:0034641//cellular nitrogen compound metabolic process;GO:0007275//multicellular organism development;GO:0006996//organelle organization;GO:0009058//biosynthetic process;GO:0044707//single-multicellular …
ENSG00000071859	4500	1514	176.933	82.4833	-1.50562	0.00311527	0.0314184	down	FAM50A	family with sequence similarity 50, member A [Source:HGNC Symbol;Acc:18786]	-	-	-	-	GO:0043227//membrane-bounded organelle;GO:0005575//cellular_component;GO:0005622//intracellular;GO:0044424//intracellular part;GO:0044464//cell part;GO:0043229//intracellular organelle;GO:0043226//organelle;GO:0005623//cell;GO:0043231//intracellular membrane-bounded organelle;GO:0005634//nucleus	GO:0003674//molecular_function	GO:0000003//reproduction;GO:0008150//biological_process
ENSG00000072506	3173.67	859	207.39	78.58	-1.82397	0.000500348	0.0110941	down	HSD17B10	hydroxysteroid (17-beta) dehydrogenase 10 [Source:HGNC Symbol;Acc:4800]	Metabolism;Human Diseases	Amino acid metabolism;Neurodegenerative diseases	ko05010//Alzheimer's disease;ko00280//Valine, leucine and isoleucine degradation	K08683	GO:0005739//mitochondrion;GO:0043227//membrane-bounded organelle;GO:0044424//intracellular part;GO:0043226//organelle;GO:0005623//cell;GO:0005886//plasma membrane;GO:0005783//endoplasmic reticulum;GO:0016020//membrane;GO:0005737//cytoplasm;GO:0012505//endomembrane system;GO:0071944//cell periphery;GO:0005622//intracellular;GO:0043231//intracellular membrane-bounded organelle;GO:0005575//cellular_…	GO:0003674//molecular_function;GO:0003824//catalytic activity;GO:0016491//oxidoreductase activity	GO:0034660//ncRNA metabolic process;GO:0046483//heterocycle metabolic process;GO:0006629//lipid metabolic process;GO:0006139//nucleobase-containing compound metabolic process;GO:0044710//single-organism metabolic process;GO:0090304//nucleic acid metabolic process;GO:0008150//biological_process;GO:0009056//catabolic process;GO:0044763//single-organism cellular process;GO:0016070//RNA metabolic pro…
ENSG00000072571	1054.33	2569	21.07	58.4933	1.29849	0.00611638	0.0463352	up	HMMR	hyaluronan-mediated motility receptor (RHAMM) [Source:HGNC Symbol;Acc:5012]	Environmental Information Processing	Signaling molecules and interaction	ko04512//ECM-receptor interaction	K06267	GO:0071944//cell periphery;GO:0044464//cell part;GO:0005623//cell;GO:0005737//cytoplasm;GO:0005886//plasma membrane;GO:0005575//cellular_component;GO:0016020//membrane;GO:0044424//intracellular part;GO:0005622//intracellular	GO:0003674//molecular_function	GO:0005975//carbohydrate metabolic process;GO:0009056//catabolic process;GO:0044710//single-organism metabolic process;GO:0071704//organic substance metabolic process;GO:0008152//metabolic process;GO:0044238//primary metabolic process;GO:0044699//single-organism process;GO:0008150//biological_process;GO:0044281//small molecule metabolic process
ENSG00000072832	41.6667	93.6667	0.876667	2.33667	1.19216	0.00572616	0.0447531	up	CRMP1	collapsin response mediator protein 1 [Source:HGNC Symbol;Acc:2365]	-	-	-	-	GO:0044444//cytoplasmic part;GO:0043229//intracellular organelle;GO:0005856//cytoskeleton;GO:0015630//microtubule cytoskeleton;GO:0043234//protein complex;GO:0005829//cytosol;GO:0044422//organelle part;GO:0005737//cytoplasm;GO:0005815//microtubule organizing center;GO:0032991//macromolecular complex;GO:0044446//intracellular organelle part;GO:0044430//cytoskeletal part;GO:0043228//non-membrane-bo…	GO:0003674//molecular_function;GO:0016787//hydrolase activity;GO:0016810//hydrolase activity, acting on carbon-nitrogen (but not peptide) bonds;GO:0003824//catalytic activity	GO:0048856//anatomical structure development;GO:0048869//cellular developmental process;GO:0000902//cell morphogenesis;GO:0008152//metabolic process;GO:0032502//developmental process;GO:0016043//cellular component organization;GO:0006807//nitrogen compound metabolic process;GO:0044767//single-organism developmental process;GO:0008150//biological_process;GO:0030154//cell differentiation;GO:0044763…
ENSG00000073169	1481.67	462	41.6167	16.4167	-1.61294	0.00169167	0.0221409	down	SELO	-	-	-	-	-	-	-	-
ENSG00000073331	76	176.333	1.19667	2.62	1.24059	0.00365217	0.0340287	up	ALPK1	-	-	-	-	-	-	GO:0043167//ion binding;GO:0016772//transferase activity, transferring phosphorus-containing groups;GO:0016740//transferase activity;GO:0016301//kinase activity;GO:0003674//molecular_function;GO:0005488//binding;GO:0003824//catalytic activity	GO:0044238//primary metabolic process;GO:0044237//cellular metabolic process;GO:0036211//protein modification process;GO:0043170//macromolecule metabolic process;GO:0044260//cellular macromolecule metabolic process;GO:0009987//cellular process;GO:0043412//macromolecule modification;GO:0006464//cellular protein modification process;GO:0008152//metabolic process;GO:0008150//biological_process;GO:00…
ENSG00000074047	156.667	423	1.45667	5.98667	1.43942	0.00258829	0.0282819	up	GLI2	GLI family zinc finger 2 [Source:HGNC Symbol;Acc:4318]	Environmental Information Processing;Human Diseases	Signal transduction;Cancers	ko05200//Pathways in cancer;ko04390//Hippo signaling pathway;ko05217//Basal cell carcinoma;ko04340//Hedgehog signaling pathway	K16798	GO:0042995//cell projection;GO:0031981//nuclear lumen;GO:0043227//membrane-bounded organelle;GO:0005622//intracellular;GO:0005929//cilium;GO:0031974//membrane-enclosed lumen;GO:0043229//intracellular organelle;GO:0043233//organelle lumen;GO:0005575//cellular_component;GO:0044422//organelle part;GO:0044428//nuclear part;GO:0005654//nucleoplasm;GO:0005737//cytoplasm;GO:0043231//intracellular membra…	GO:0003676//nucleic acid binding;GO:0003674//molecular_function;GO:0043167//ion binding;GO:1901363//heterocyclic compound binding;GO:0003677//DNA binding;GO:0005488//binding;GO:0097159//organic cyclic compound binding;GO:0001071//nucleic acid binding transcription factor activity	GO:0048646//anatomical structure formation involved in morphogenesis;GO:0032501//multicellular organismal process;GO:0008219//cell death;GO:0007275//multicellular organism development;GO:0040011//locomotion;GO:0032502//developmental process;GO:0044700//single organism signaling;GO:0007267//cell-cell signaling;GO:0044763//single-organism cellular process;GO:0009653//anatomical structure morphogene…
ENSG00000074071	5932.67	1618	347.97	131.703	-1.81414	0.000661558	0.0129401	down	MRPS34	mitochondrial ribosomal protein S34 [Source:HGNC Symbol;Acc:16618]	-	-	-	-	GO:0043231//intracellular membrane-bounded organelle;GO:0005623//cell;GO:0005737//cytoplasm;GO:0005739//mitochondrion;GO:0005840//ribosome;GO:0044464//cell part;GO:0043232//intracellular non-membrane-bounded organelle;GO:0005622//intracellular;GO:0043229//intracellular organelle;GO:0005575//cellular_component;GO:0043228//non-membrane-bounded organelle;GO:1990904//ribonucleoprotein complex;GO:0043…	-	-
ENSG00000074410	574.333	2173.67	6.13333	34.62	1.94	1.28991e-06	0.000210255	up	CA12	carbonic anhydrase XII [Source:HGNC Symbol;Acc:1371]	Metabolism	Energy metabolism	ko00910//Nitrogen metabolism	K01672	GO:0044464//cell part;GO:0071944//cell periphery;GO:0005575//cellular_component;GO:0005886//plasma membrane;GO:0005623//cell;GO:0016020//membrane	GO:0016829//lyase activity;GO:0005488//binding;GO:0043167//ion binding;GO:0003674//molecular_function;GO:0003824//catalytic activity	GO:0044281//small molecule metabolic process;GO:0051179//localization;GO:0051234//establishment of localization;GO:0008150//biological_process;GO:0006810//transport;GO:0044710//single-organism metabolic process;GO:0044699//single-organism process;GO:0008152//metabolic process
ENSG00000074842	6059.33	1762.33	362.987	147.077	-1.73088	0.000868705	0.0150356	down	C19orf10	chromosome 19 open reading frame 10 [Source:HGNC Symbol;Acc:16948]	-	-	-	-	GO:0043229//intracellular organelle;GO:0044424//intracellular part;GO:0005623//cell;GO:0005622//intracellular;GO:0043227//membrane-bounded organelle;GO:0012505//endomembrane system;GO:0005576//extracellular region;GO:0005575//cellular_component;GO:0043226//organelle;GO:0005783//endoplasmic reticulum;GO:0005737//cytoplasm;GO:0044464//cell part;GO:0044444//cytoplasmic part;GO:0043231//intracellular…	-	GO:0006950//response to stress;GO:0009987//cellular process;GO:0065007//biological regulation;GO:0050789//regulation of biological process;GO:0044700//single organism signaling;GO:0044699//single-organism process;GO:0044763//single-organism cellular process;GO:0007154//cell communication;GO:0023052//signaling;GO:0007165//signal transduction;GO:0051716//cellular response to stimulus;GO:0008150//bi…
ENSG00000074855	125	315.333	1.58333	4.47333	1.34338	0.00218278	0.0257284	up	ANO8	anoctamin 8 [Source:HGNC Symbol;Acc:29329]	-	-	-	-	GO:0005886//plasma membrane;GO:0005622//intracellular;GO:0044464//cell part;GO:0071944//cell periphery;GO:0005575//cellular_component;GO:0005623//cell;GO:0016020//membrane	-	GO:0051234//establishment of localization;GO:0055085//transmembrane transport;GO:0008150//biological_process;GO:0051179//localization;GO:0006810//transport
ENSG00000074966	10.6667	32.6667	0.306667	2.00333	1.62262	0.00326611	0.0321453	up	TXK	TXK tyrosine kinase [Source:HGNC Symbol;Acc:12434]	Organismal Systems	Immune system	ko04670//Leukocyte transendothelial migration	K08016	GO:0016020//membrane;GO:0005622//intracellular;GO:0043227//membrane-bounded organelle;GO:0043226//organelle;GO:0005634//nucleus;GO:0005575//cellular_component;GO:0043229//intracellular organelle;GO:0044424//intracellular part;GO:0005737//cytoplasm;GO:0044464//cell part;GO:0005623//cell;GO:0071944//cell periphery;GO:0005886//plasma membrane;GO:0043231//intracellular membrane-bounded organelle	GO:0016301//kinase activity;GO:0003677//DNA binding;GO:0005488//binding;GO:0016772//transferase activity, transferring phosphorus-containing groups;GO:1901363//heterocyclic compound binding;GO:0043167//ion binding;GO:0016740//transferase activity;GO:0003676//nucleic acid binding;GO:0097159//organic cyclic compound binding;GO:0003674//molecular_function;GO:0003824//catalytic activity	GO:0044238//primary metabolic process;GO:0044237//cellular metabolic process;GO:0006464//cellular protein modification process;GO:0043412//macromolecule modification;GO:0032502//developmental process;GO:0002376//immune system process;GO:0048869//cellular developmental process;GO:0034641//cellular nitrogen compound metabolic process;GO:0050794//regulation of cellular process;GO:0044699//single-org…
ENSG00000075407	435.333	1094	2.92667	8.63333	1.3587	0.0018723	0.0235246	up	ZNF37A	zinc finger protein 37A [Source:HGNC Symbol;Acc:13102]	-	-	-	-	GO:0005623//cell;GO:0043229//intracellular organelle;GO:0005575//cellular_component;GO:0044424//intracellular part;GO:0005622//intracellular;GO:0005634//nucleus;GO:0044464//cell part;GO:0043227//membrane-bounded organelle;GO:0043226//organelle;GO:0043231//intracellular membrane-bounded organelle	GO:0001071//nucleic acid binding transcription factor activity;GO:1901363//heterocyclic compound binding;GO:0097159//organic cyclic compound binding;GO:0003677//DNA binding;GO:0043167//ion binding;GO:0003676//nucleic acid binding;GO:0003674//molecular_function;GO:0005488//binding	GO:0009987//cellular process;GO:0008150//biological_process;GO:0006807//nitrogen compound metabolic process;GO:0009058//biosynthetic process;GO:0034641//cellular nitrogen compound metabolic process;GO:0008152//metabolic process;GO:0044237//cellular metabolic process
ENSG00000075420	1112	2562.67	11.8433	26.5733	1.22678	0.00525745	0.0426179	up	FNDC3B	-	-	-	-	-	GO:0044444//cytoplasmic part;GO:0005623//cell;GO:0012505//endomembrane system;GO:0044424//intracellular part;GO:0005575//cellular_component;GO:0005783//endoplasmic reticulum;GO:0043226//organelle;GO:0005737//cytoplasm;GO:0044464//cell part;GO:0043229//intracellular organelle;GO:0005622//intracellular;GO:0043231//intracellular membrane-bounded organelle;GO:0043227//membrane-bounded organelle	GO:0003674//molecular_function	GO:0008150//biological_process
ENSG00000075426	1899	4593	14.7367	38.4333	1.29257	0.00316853	0.0316158	up	FOSL2	FOS-like antigen 2 [Source:HGNC Symbol;Acc:3798]	Organismal Systems	Development	ko04380//Osteoclast differentiation	K09030	GO:0043226//organelle;GO:0043227//membrane-bounded organelle;GO:0043229//intracellular organelle;GO:0044424//intracellular part;GO:0005623//cell;GO:0005634//nucleus;GO:0044464//cell part;GO:0005622//intracellular;GO:0043231//intracellular membrane-bounded organelle;GO:0005575//cellular_component	GO:1901363//heterocyclic compound binding;GO:0001071//nucleic acid binding transcription factor activity;GO:0005488//binding;GO:0097159//organic cyclic compound binding;GO:0003676//nucleic acid binding;GO:0003677//DNA binding;GO:0003674//molecular_function	GO:0006807//nitrogen compound metabolic process;GO:0034641//cellular nitrogen compound metabolic process;GO:0008150//biological_process;GO:0008152//metabolic process;GO:0008219//cell death;GO:0009987//cellular process;GO:0009058//biosynthetic process;GO:0044699//single-organism process;GO:0044237//cellular metabolic process;GO:0044763//single-organism cellular process
ENSG00000075826	27.16	105.013	0.383333	1.54	1.96521	1.05269e-05	0.00116145	up	SEC31B	-	Genetic Information Processing	Folding, sorting and degradation	ko04141//Protein processing in endoplasmic reticulum	K14005	GO:0097708//intracellular vesicle;GO:0005623//cell;GO:0005737//cytoplasm;GO:0005783//endoplasmic reticulum;GO:0032991//macromolecular complex;GO:0031988//membrane-bounded vesicle;GO:0012505//endomembrane system;GO:0016023//cytoplasmic, membrane-bounded vesicle;GO:0044424//intracellular part;GO:0043234//protein complex;GO:0031982//vesicle;GO:0043227//membrane-bounded organelle;GO:0044444//cytoplas…	GO:0003674//molecular_function	GO:0016192//vesicle-mediated transport;GO:0006810//transport;GO:0008150//biological_process;GO:0051179//localization;GO:0051234//establishment of localization
ENSG00000075914	865	359.333	48.0333	27.5867	-1.21689	0.00455957	0.0391349	down	EXOSC7	exosome component 7 [Source:HGNC Symbol;Acc:28112]	Genetic Information Processing	Folding, sorting and degradation	ko03018//RNA degradation	K12589	GO:0043229//intracellular organelle;GO:0043228//non-membrane-bounded organelle;GO:0044444//cytoplasmic part;GO:0044464//cell part;GO:0032991//macromolecular complex;GO:0043226//organelle;GO:0043232//intracellular non-membrane-bounded organelle;GO:0043231//intracellular membrane-bounded organelle;GO:0005730//nucleolus;GO:0005623//cell;GO:0005737//cytoplasm;GO:0044422//organelle part;GO:0044424//in…	GO:0016788//hydrolase activity, acting on ester bonds;GO:0003824//catalytic activity;GO:0004518//nuclease activity;GO:0016787//hydrolase activity;GO:0003676//nucleic acid binding;GO:0003674//molecular_function;GO:1901363//heterocyclic compound binding;GO:0005488//binding;GO:0003723//RNA binding;GO:0097159//organic cyclic compound binding	GO:0034641//cellular nitrogen compound metabolic process;GO:0071840//cellular component organization or biogenesis;GO:0006725//cellular aromatic compound metabolic process;GO:0006807//nitrogen compound metabolic process;GO:1901360//organic cyclic compound metabolic process;GO:0046483//heterocycle metabolic process;GO:1901575//organic substance catabolic process;GO:0044248//cellular catabolic proc…
ENSG00000076604	1164	437	22.9967	15.9567	-1.36422	0.00143988	0.0199937	down	TRAF4	TNF receptor-associated factor 4 [Source:HGNC Symbol;Acc:12034]	Human Diseases	Cancers	ko05200//Pathways in cancer;ko05222//Small cell lung cancer	K09848	GO:0043231//intracellular membrane-bounded organelle;GO:0005856//cytoskeleton;GO:0043226//organelle;GO:0005622//intracellular;GO:0005886//plasma membrane;GO:0043227//membrane-bounded organelle;GO:0043229//intracellular organelle;GO:0044424//intracellular part;GO:0005623//cell;GO:0016020//membrane;GO:0044464//cell part;GO:0043232//intracellular non-membrane-bounded organelle;GO:0043228//non-membra…	GO:0003676//nucleic acid binding;GO:0005515//protein binding;GO:0097159//organic cyclic compound binding;GO:0003677//DNA binding;GO:0003824//catalytic activity;GO:0005488//binding;GO:0016874//ligase activity;GO:0043167//ion binding;GO:1901363//heterocyclic compound binding;GO:0003674//molecular_function;GO:0019899//enzyme binding	GO:0048856//anatomical structure development;GO:0009987//cellular process;GO:0051716//cellular response to stimulus;GO:0050794//regulation of cellular process;GO:0023052//signaling;GO:0007154//cell communication;GO:0044763//single-organism cellular process;GO:0032502//developmental process;GO:0044700//single organism signaling;GO:0008150//biological_process;GO:0008219//cell death;GO:0044699//sing…
ENSG00000076641	49	137.333	0.256667	0.9	1.49581	0.00125856	0.0185752	up	PAG1	phosphoprotein associated with glycosphingolipid microdomains 1 [Source:HGNC Symbol;Acc:30043]	-	-	-	-	GO:0071944//cell periphery;GO:0005623//cell;GO:0005575//cellular_component;GO:0016020//membrane;GO:0044464//cell part;GO:0005886//plasma membrane	GO:0030674//protein binding, bridging;GO:0003674//molecular_function;GO:0005488//binding;GO:0060090//binding, bridging;GO:0005515//protein binding	GO:0044700//single organism signaling;GO:0009987//cellular process;GO:0050794//regulation of cellular process;GO:0007165//signal transduction;GO:0044699//single-organism process;GO:0065007//biological regulation;GO:0023052//signaling;GO:0008150//biological_process;GO:0002376//immune system process;GO:0044763//single-organism cellular process;GO:0050896//response to stimulus;GO:0051716//cellular r…
ENSG00000077348	725.667	230.333	38.22	16.7433	-1.59607	0.00178439	0.0227783	down	EXOSC5	-	Genetic Information Processing	Folding, sorting and degradation	ko03018//RNA degradation	K12590	GO:0005623//cell;GO:0044444//cytoplasmic part;GO:0005694//chromosome;GO:0043234//protein complex;GO:0043232//intracellular non-membrane-bounded organelle;GO:0031981//nuclear lumen;GO:0005730//nucleolus;GO:0005634//nucleus;GO:0005737//cytoplasm;GO:0005622//intracellular;GO:0044446//intracellular organelle part;GO:0032991//macromolecular complex;GO:0005829//cytosol;GO:0044422//organelle part;GO:004…	GO:0005488//binding;GO:0016787//hydrolase activity;GO:0003723//RNA binding;GO:0016788//hydrolase activity, acting on ester bonds;GO:0097159//organic cyclic compound binding;GO:0003676//nucleic acid binding;GO:0003674//molecular_function;GO:1901363//heterocyclic compound binding;GO:0003824//catalytic activity;GO:0004518//nuclease activity	GO:0019439//aromatic compound catabolic process;GO:0002376//immune system process;GO:0090304//nucleic acid metabolic process;GO:0034655//nucleobase-containing compound catabolic process;GO:0043170//macromolecule metabolic process;GO:0044270//cellular nitrogen compound catabolic process;GO:0044260//cellular macromolecule metabolic process;GO:0044085//cellular component biogenesis;GO:1901361//organ…
ENSG00000077935	32	90.6667	0.4	1.39	1.52519	0.000411134	0.00994471	up	SMC1B	structural maintenance of chromosomes 1B [Source:HGNC Symbol;Acc:11112]	Cellular Processes	Cell growth and death	ko04110//Cell cycle;ko04114//Oocyte meiosis	K06636	GO:0043229//intracellular organelle;GO:0044428//nuclear part;GO:0043234//protein complex;GO:0044424//intracellular part;GO:0043232//intracellular non-membrane-bounded organelle;GO:0005622//intracellular;GO:0043227//membrane-bounded organelle;GO:0044446//intracellular organelle part;GO:0043226//organelle;GO:0031974//membrane-enclosed lumen;GO:0044464//cell part;GO:0044422//organelle part;GO:004323…	GO:0043167//ion binding;GO:0097159//organic cyclic compound binding;GO:0005488//binding;GO:1901363//heterocyclic compound binding;GO:0003677//DNA binding;GO:0003674//molecular_function;GO:0003676//nucleic acid binding	GO:0007067//mitotic nuclear division;GO:0044699//single-organism process;GO:0048285//organelle fission;GO:0000278//mitotic cell cycle;GO:0044260//cellular macromolecule metabolic process;GO:1903047//mitotic cell cycle process;GO:0000003//reproduction;GO:0034641//cellular nitrogen compound metabolic process;GO:0044763//single-organism cellular process;GO:1901360//organic cyclic compound metabolic …
ENSG00000078114	64.6667	157.333	0.813333	2.11	1.30067	0.00554876	0.0439193	up	NEBL	-	-	-	-	-	GO:0005575//cellular_component;GO:0005623//cell;GO:0005622//intracellular;GO:0043226//organelle;GO:0044464//cell part;GO:0005737//cytoplasm;GO:0043232//intracellular non-membrane-bounded organelle;GO:0043229//intracellular organelle;GO:0043228//non-membrane-bounded organelle;GO:0005856//cytoskeleton;GO:0044424//intracellular part	GO:0005198//structural molecule activity;GO:0005488//binding;GO:0003674//molecular_function;GO:0005515//protein binding;GO:0043167//ion binding;GO:0008092//cytoskeletal protein binding	GO:0009987//cellular process;GO:0006996//organelle organization;GO:0071840//cellular component organization or biogenesis;GO:0044767//single-organism developmental process;GO:0009653//anatomical structure morphogenesis;GO:0022607//cellular component assembly;GO:0048869//cellular developmental process;GO:0044763//single-organism cellular process;GO:0048856//anatomical structure development;GO:0008…
ENSG00000078177	156.667	387	0.84	2.44	1.32502	0.00654035	0.0484842	up	N4BP2	-	-	-	-	-	GO:0005622//intracellular;GO:0044444//cytoplasmic part;GO:0005737//cytoplasm;GO:0005623//cell;GO:0044424//intracellular part;GO:0044464//cell part;GO:0005829//cytosol;GO:0005575//cellular_component	GO:0016772//transferase activity, transferring phosphorus-containing groups;GO:0016301//kinase activity;GO:0043167//ion binding;GO:0003824//catalytic activity;GO:0004518//nuclease activity;GO:0005488//binding;GO:0016788//hydrolase activity, acting on ester bonds;GO:0016740//transferase activity;GO:0016787//hydrolase activity;GO:0003674//molecular_function	-
ENSG00000078401	331.333	975.667	9.09667	31.3133	1.57718	2.36286e-05	0.00201657	up	EDN1	endothelin 1 [Source:HGNC Symbol;Acc:3176]	Organismal Systems;Environmental Information Processing;Human Diseases	Cardiovascular diseases;Signal transduction;Endocrine system;Circulatory system	ko04270//Vascular smooth muscle contraction;ko04668//TNF signaling pathway;ko05410//Hypertrophic cardiomyopathy (HCM);ko04066//HIF-1 signaling pathway;ko04916//Melanogenesis	K16366	GO:0044464//cell part;GO:0005615//extracellular space;GO:0005576//extracellular region;GO:0044421//extracellular region part;GO:0005575//cellular_component;GO:0005623//cell;GO:0005622//intracellular;GO:0005737//cytoplasm;GO:0044424//intracellular part	GO:0003674//molecular_function	GO:0007568//aging;GO:0065007//biological regulation;GO:0044707//single-multicellular organism process;GO:0044700//single organism signaling;GO:0006950//response to stress;GO:0048856//anatomical structure development;GO:0006629//lipid metabolic process;GO:0044767//single-organism developmental process;GO:0003013//circulatory system process;GO:0050877//neurological system process;GO:0007267//cell-c…
ENSG00000078747	1125	2634.67	12.4533	36.9967	1.25299	0.00461065	0.039405	up	ITCH	itchy E3 ubiquitin protein ligase [Source:HGNC Symbol;Acc:13890]	Genetic Information Processing;Cellular Processes;Environmental Information Processing;Human Diseases	Endocrine and metabolic diseases;Signal transduction;Transport and catabolism;Folding, sorting and degradation	ko04144//Endocytosis;ko04932//Non-alcoholic fatty liver disease (NAFLD);ko04120//Ubiquitin mediated proteolysis;ko04668//TNF signaling pathway	K05632	GO:0005623//cell;GO:0005575//cellular_component;GO:0043227//membrane-bounded organelle;GO:0043229//intracellular organelle;GO:0044444//cytoplasmic part;GO:0043231//intracellular membrane-bounded organelle;GO:0044464//cell part;GO:0005737//cytoplasm;GO:0005622//intracellular;GO:0044424//intracellular part;GO:0071944//cell periphery;GO:0005634//nucleus;GO:0016020//membrane;GO:0005829//cytosol;GO:00…	GO:0003824//catalytic activity;GO:0003674//molecular_function;GO:0016874//ligase activity	GO:0043170//macromolecule metabolic process;GO:0051716//cellular response to stimulus;GO:0009056//catabolic process;GO:0044403//symbiosis, encompassing mutualism through parasitism;GO:0002376//immune system process;GO:0008152//metabolic process;GO:0044419//interspecies interaction between organisms;GO:0019538//protein metabolic process;GO:0040011//locomotion;GO:0071704//organic substance metaboli…
ENSG00000078967	152.333	67.6833	4.57333	2.45333	-1.13495	0.0043637	0.038008	down	UBE2D4	ubiquitin-conjugating enzyme E2D 4 (putative) [Source:HGNC Symbol;Acc:21647]	Genetic Information Processing	Folding, sorting and degradation	ko04141//Protein processing in endoplasmic reticulum;ko04120//Ubiquitin mediated proteolysis	K06689	-	GO:0016874//ligase activity;GO:0043167//ion binding;GO:0005488//binding;GO:0003824//catalytic activity;GO:0003674//molecular_function	GO:0044260//cellular macromolecule metabolic process;GO:0043170//macromolecule metabolic process;GO:0036211//protein modification process;GO:0008150//biological_process;GO:0008152//metabolic process;GO:0044267//cellular protein metabolic process;GO:0043412//macromolecule modification;GO:0071704//organic substance metabolic process;GO:0006464//cellular protein modification process;GO:0009987//cell…
ENSG00000079462	1913.37	488.57	116.583	43.18	-1.90321	0.000422145	0.0100538	down	PAFAH1B3	-	Metabolism	Lipid metabolism	ko00565//Ether lipid metabolism	K16795	GO:0005737//cytoplasm;GO:0005575//cellular_component;GO:0044444//cytoplasmic part;GO:0005622//intracellular;GO:0044424//intracellular part;GO:0044464//cell part;GO:0005829//cytosol;GO:0005623//cell	GO:0003674//molecular_function	GO:0044699//single-organism process;GO:0044710//single-organism metabolic process;GO:0008150//biological_process;GO:0009056//catabolic process;GO:0006629//lipid metabolic process;GO:0071704//organic substance metabolic process;GO:0048856//anatomical structure development;GO:0044238//primary metabolic process;GO:0032502//developmental process;GO:0008152//metabolic process;GO:0000003//reproduction
ENSG00000080200	326.693	823.86	5.19333	10.8833	1.35749	0.000704042	0.0133665	up	CRYBG3	-	-	-	-	-	-	-	-
ENSG00000080298	51.6667	122.667	0.45	1.17667	1.25655	0.00538899	0.043143	up	RFX3	regulatory factor X, 3 (influences HLA class II expression) [Source:HGNC Symbol;Acc:9984]	-	-	-	-	GO:0000228//nuclear chromosome;GO:0044424//intracellular part;GO:0044422//organelle part;GO:0005634//nucleus;GO:0044428//nuclear part;GO:0043228//non-membrane-bounded organelle;GO:0043229//intracellular organelle;GO:0005694//chromosome;GO:0043234//protein complex;GO:0005622//intracellular;GO:0043226//organelle;GO:0031974//membrane-enclosed lumen;GO:0005575//cellular_component;GO:0032991//macromol…	GO:0097159//organic cyclic compound binding;GO:1901363//heterocyclic compound binding;GO:0003674//molecular_function;GO:0005488//binding;GO:0001071//nucleic acid binding transcription factor activity;GO:0003676//nucleic acid binding;GO:0003677//DNA binding	GO:0000902//cell morphogenesis;GO:0051674//localization of cell;GO:0009058//biosynthetic process;GO:0040011//locomotion;GO:0008152//metabolic process;GO:0044767//single-organism developmental process;GO:0048869//cellular developmental process;GO:0016043//cellular component organization;GO:0034641//cellular nitrogen compound metabolic process;GO:0008150//biological_process;GO:0051179//localization…
ENSG00000081052	69.3333	174.667	0.343333	0.97	1.34503	0.00348652	0.0332173	up	COL4A4	collagen, type IV, alpha 4 [Source:HGNC Symbol;Acc:2206]	Organismal Systems;Cellular Processes;Environmental Information Processing;Human Diseases	Cellular commiunity;Signal transduction;Infectious diseases;Digestive system;Cancers;Signaling molecules and interaction	ko05200//Pathways in cancer;ko04151//PI3K-Akt signaling pathway;ko04510//Focal adhesion;ko05146//Amoebiasis;ko04512//ECM-receptor interaction;ko04974//Protein digestion and absorption;ko05222//Small cell lung cancer	K06237	GO:0043226//organelle;GO:0043229//intracellular organelle;GO:0043227//membrane-bounded organelle;GO:0044464//cell part;GO:0005578//proteinaceous extracellular matrix;GO:0005737//cytoplasm;GO:0044421//extracellular region part;GO:0031012//extracellular matrix;GO:0044424//intracellular part;GO:0012505//endomembrane system;GO:0005575//cellular_component;GO:0044444//cytoplasmic part;GO:0005576//extra…	GO:0003674//molecular_function;GO:0005198//structural molecule activity	GO:0008150//biological_process;GO:0030198//extracellular matrix organization;GO:0040011//locomotion;GO:0009653//anatomical structure morphogenesis;GO:0043062//extracellular structure organization;GO:0044763//single-organism cellular process;GO:0048869//cellular developmental process;GO:0030154//cell differentiation;GO:0044699//single-organism process;GO:0009987//cellular process;GO:0032502//devel…
ENSG00000081148	2	12.3333	0.0133333	0.0833333	2.58509	0.000781938	0.0141335	up	IMPG2	interphotoreceptor matrix proteoglycan 2 [Source:HGNC Symbol;Acc:18362]	-	-	-	-	GO:0044421//extracellular region part;GO:0005578//proteinaceous extracellular matrix;GO:0031012//extracellular matrix;GO:0005576//extracellular region;GO:0005575//cellular_component	GO:0043167//ion binding;GO:0005198//structural molecule activity;GO:0005488//binding;GO:0003674//molecular_function	GO:0050877//neurological system process;GO:0003008//system process;GO:0032501//multicellular organismal process;GO:0008150//biological_process
ENSG00000081692	1046.86	370.247	19.5067	9.96333	-1.44271	0.00331918	0.032444	down	JMJD4	jumonji domain containing 4 [Source:HGNC Symbol;Acc:25724]	-	-	-	-	-	GO:0003674//molecular_function	-
ENSG00000082258	460	1010	5.68667	16.5733	1.15699	0.00597356	0.0458644	up	CCNT2	cyclin T2 [Source:HGNC Symbol;Acc:1600]	Human Diseases	Cancers	ko05202//Transcriptional misregulation in cancers	K15188	GO:0005575//cellular_component;GO:0043233//organelle lumen;GO:0043229//intracellular organelle;GO:0043227//membrane-bounded organelle;GO:0005622//intracellular;GO:0070013//intracellular organelle lumen;GO:0031974//membrane-enclosed lumen;GO:0044446//intracellular organelle part;GO:0044464//cell part;GO:0005623//cell;GO:0044424//intracellular part;GO:0043226//organelle;GO:0044422//organelle part;G…	GO:0005515//protein binding;GO:0019899//enzyme binding;GO:0005488//binding;GO:0003674//molecular_function	GO:0006807//nitrogen compound metabolic process;GO:0009987//cellular process;GO:0044763//single-organism cellular process;GO:0007154//cell communication;GO:0050896//response to stimulus;GO:0007165//signal transduction;GO:0051716//cellular response to stimulus;GO:0050789//regulation of biological process;GO:0044419//interspecies interaction between organisms;GO:0065007//biological regulation;GO:00…
ENSG00000082512	253.333	559	4.15	11.0467	1.17575	0.0020688	0.0249459	up	TRAF5	TNF receptor-associated factor 5 [Source:HGNC Symbol;Acc:12035]	Environmental Information Processing;Human Diseases	Signal transduction;Infectious diseases;Cancers	ko05203//Viral carcinogenesis;ko05200//Pathways in cancer;ko05168//Herpes simplex infection;ko05169//Epstein-Barr virus infection;ko04064//NF-kappa B signaling pathway;ko04668//TNF signaling pathway;ko05222//Small cell lung cancer	K09849	GO:0043229//intracellular organelle;GO:0005622//intracellular;GO:0071944//cell periphery;GO:0015630//microtubule cytoskeleton;GO:0005737//cytoplasm;GO:0005829//cytosol;GO:0044430//cytoskeletal part;GO:0043234//protein complex;GO:0044422//organelle part;GO:0044424//intracellular part;GO:0044464//cell part;GO:0005623//cell;GO:0016020//membrane;GO:0043228//non-membrane-bounded organelle;GO:0005856//…	GO:0005488//binding;GO:0043167//ion binding;GO:0019899//enzyme binding;GO:0004871//signal transducer activity;GO:0016874//ligase activity;GO:0005515//protein binding;GO:0003824//catalytic activity;GO:0003674//molecular_function	GO:0023052//signaling;GO:0065007//biological regulation;GO:0009987//cellular process;GO:0050794//regulation of cellular process;GO:0007154//cell communication;GO:0008219//cell death;GO:0044763//single-organism cellular process;GO:0050896//response to stimulus;GO:0044700//single organism signaling;GO:0050789//regulation of biological process;GO:0051716//cellular response to stimulus;GO:0044699//si…
ENSG00000082515	1044.67	428.667	97.7567	44.3367	-1.24185	0.00222664	0.0259472	down	MRPL22	mitochondrial ribosomal protein L22 [Source:HGNC Symbol;Acc:14480]	Genetic Information Processing	Translation	ko03010//Ribosome	K02890	GO:0043228//non-membrane-bounded organelle;GO:0043227//membrane-bounded organelle;GO:0043231//intracellular membrane-bounded organelle;GO:0044444//cytoplasmic part;GO:0005737//cytoplasm;GO:0044464//cell part;GO:0005575//cellular_component;GO:0005840//ribosome;GO:0043226//organelle;GO:0043229//intracellular organelle;GO:0005739//mitochondrion;GO:0044424//intracellular part;GO:0005622//intracellula…	GO:0003735//structural constituent of ribosome;GO:0005198//structural molecule activity;GO:0003674//molecular_function	GO:0044237//cellular metabolic process;GO:0044271//cellular nitrogen compound biosynthetic process;GO:0006412//translation;GO:0034645//cellular macromolecule biosynthetic process;GO:0071704//organic substance metabolic process;GO:0043603//cellular amide metabolic process;GO:0006518//peptide metabolic process;GO:0044238//primary metabolic process;GO:1901576//organic substance biosynthetic process;…
ENSG00000083457	388.333	134.667	49.9267	23.21	-1.49443	0.00128841	0.0187993	down	ITGAE	integrin, alpha E (antigen CD103, human mucosal lymphocyte antigen 1; alpha polypeptide) [Source:HGNC Symbol;Acc:6147]	Cellular Processes	Cell motility	ko04810//Regulation of actin cytoskeleton	K06524	GO:0032991//macromolecular complex;GO:0044464//cell part;GO:0016020//membrane;GO:0005886//plasma membrane;GO:0005575//cellular_component;GO:0071944//cell periphery;GO:0005623//cell;GO:0043234//protein complex	GO:0003674//molecular_function;GO:0005488//binding;GO:0043167//ion binding	GO:0051716//cellular response to stimulus;GO:0007155//cell adhesion;GO:0044763//single-organism cellular process;GO:0007165//signal transduction;GO:0044699//single-organism process;GO:0008150//biological_process;GO:0023052//signaling;GO:0007154//cell communication;GO:0050789//regulation of biological process;GO:0022610//biological adhesion;GO:0050794//regulation of cellular process;GO:0044700//si…
ENSG00000083807	209.123	71.89	24.1767	8.72333	-1.48151	0.0062153	0.0468628	down	SLC27A5	solute carrier family 27 (fatty acid transporter), member 5 [Source:HGNC Symbol;Acc:10999]	Organismal Systems;Metabolism;Human Diseases	Endocrine and metabolic diseases;Digestive system;Lipid metabolism;Endocrine system	ko04931//Insulin resistance;ko03320//PPAR signaling pathway;ko04976//Bile secretion;ko00120//Primary bile acid biosynthesis	K08748	GO:0005886//plasma membrane;GO:0043229//intracellular organelle;GO:0032991//macromolecular complex;GO:0005575//cellular_component;GO:0043226//organelle;GO:0005783//endoplasmic reticulum;GO:0012505//endomembrane system;GO:0043234//protein complex;GO:0044444//cytoplasmic part;GO:0043231//intracellular membrane-bounded organelle;GO:0044464//cell part;GO:0005622//intracellular;GO:0005623//cell;GO:001…	GO:0003824//catalytic activity;GO:0005488//binding;GO:0016874//ligase activity;GO:0003674//molecular_function;GO:0043167//ion binding	GO:0009058//biosynthetic process;GO:0051179//localization;GO:0051234//establishment of localization;GO:0008150//biological_process;GO:0006810//transport;GO:0055085//transmembrane transport;GO:0071704//organic substance metabolic process;GO:0008152//metabolic process;GO:0006629//lipid metabolic process;GO:0044699//single-organism process;GO:0044281//small molecule metabolic process;GO:0044238//pri…
ENSG00000083845	23302.5	6302	2367.71	909.35	-1.82774	0.000470151	0.0106999	down	RPS5	ribosomal protein S5 [Source:HGNC Symbol;Acc:10426]	Genetic Information Processing	Translation	ko03010//Ribosome	K02989	GO:0005840//ribosome;GO:0044424//intracellular part;GO:0044464//cell part;GO:0043226//organelle;GO:0043228//non-membrane-bounded organelle;GO:0005623//cell;GO:1990904//ribonucleoprotein complex;GO:0030529//intracellular ribonucleoprotein complex;GO:0032991//macromolecular complex;GO:0005575//cellular_component;GO:0044444//cytoplasmic part;GO:0005829//cytosol;GO:0043229//intracellular organelle;GO…	GO:0003674//molecular_function;GO:0003735//structural constituent of ribosome;GO:0044822//poly(A) RNA binding;GO:0005488//binding;GO:0005198//structural molecule activity;GO:0003723//RNA binding;GO:0003676//nucleic acid binding;GO:0097159//organic cyclic compound binding;GO:0003729//mRNA binding;GO:1901363//heterocyclic compound binding	GO:1901566//organonitrogen compound biosynthetic process;GO:0051704//multi-organism process;GO:0044249//cellular biosynthetic process;GO:0034613//cellular protein localization;GO:0008150//biological_process;GO:0046700//heterocycle catabolic process;GO:0006605//protein targeting;GO:0044419//interspecies interaction between organisms;GO:0008152//metabolic process;GO:1901576//organic substance biosy…
ENSG00000084207	16172.7	4520	1174.69	411.383	-1.78165	0.00068566	0.0132539	down	GSTP1	glutathione S-transferase pi 1 [Source:HGNC Symbol;Acc:4638]	Metabolism;Human Diseases	Xenobiotics biodegradation and metabolism;Cancers;Metabolism of other amino acids	ko05200//Pathways in cancer;ko05215//Prostate cancer;ko05204//Chemical carcinogenesis;ko00980//Metabolism of xenobiotics by cytochrome P450;ko00982//Drug metabolism - cytochrome P450;ko00480//Glutathione metabolism	K00799	GO:0032991//macromolecular complex;GO:0043234//protein complex;GO:0044444//cytoplasmic part;GO:0043227//membrane-bounded organelle;GO:0005829//cytosol;GO:0005622//intracellular;GO:0005634//nucleus;GO:0043226//organelle;GO:0005575//cellular_component;GO:0044424//intracellular part;GO:0005737//cytoplasm;GO:0043231//intracellular membrane-bounded organelle;GO:0005623//cell;GO:0005739//mitochondrion;…	GO:0098772//molecular function regulator;GO:0003824//catalytic activity;GO:0005515//protein binding;GO:0003674//molecular_function;GO:0019899//enzyme binding;GO:0030234//enzyme regulator activity;GO:0016740//transferase activity;GO:0005488//binding;GO:0016765//transferase activity, transferring alkyl or aryl (other than methyl) groups	GO:0071704//organic substance metabolic process;GO:0006790//sulfur compound metabolic process;GO:0008152//metabolic process;GO:0019752//carboxylic acid metabolic process;GO:0009058//biosynthetic process;GO:0044237//cellular metabolic process;GO:0042592//homeostatic process;GO:0050896//response to stimulus;GO:0044763//single-organism cellular process;GO:0009987//cellular process;GO:0034641//cellul…
ENSG00000085224	964.667	3099	7.00333	29.9833	1.71068	0.00435003	0.0379484	up	ATRX	-	-	-	-	-	GO:0070013//intracellular organelle lumen;GO:0044464//cell part;GO:0005575//cellular_component;GO:0000228//nuclear chromosome;GO:0043229//intracellular organelle;GO:0005694//chromosome;GO:0005623//cell;GO:0043226//organelle;GO:0031974//membrane-enclosed lumen;GO:0044424//intracellular part;GO:0043228//non-membrane-bounded organelle;GO:0005622//intracellular;GO:0044446//intracellular organelle par…	GO:0017111//nucleoside-triphosphatase activity;GO:1901363//heterocyclic compound binding;GO:0004386//helicase activity;GO:0005488//binding;GO:0003676//nucleic acid binding;GO:0016817//hydrolase activity, acting on acid anhydrides;GO:0016787//hydrolase activity;GO:0043167//ion binding;GO:0016462//pyrophosphatase activity;GO:0016818//hydrolase activity, acting on acid anhydrides, in phosphorus-cont…	GO:0044238//primary metabolic process;GO:0034641//cellular nitrogen compound metabolic process;GO:0006259//DNA metabolic process;GO:0044237//cellular metabolic process;GO:0006725//cellular aromatic compound metabolic process;GO:0090304//nucleic acid metabolic process;GO:0006807//nitrogen compound metabolic process;GO:0043170//macromolecule metabolic process;GO:0048856//anatomical structure develo…
ENSG00000085365	695.667	1546	8.31333	20.1233	1.173	0.003832	0.0350695	up	SCAMP1	secretory carrier membrane protein 1 [Source:HGNC Symbol;Acc:10563]	-	-	-	-	GO:0005575//cellular_component	-	GO:0051234//establishment of localization;GO:0008150//biological_process;GO:0051179//localization;GO:0006810//transport
ENSG00000085382	220.667	561	3.63667	8.76667	1.35361	0.00528071	0.0427115	up	HACE1	HECT domain and ankyrin repeat containing E3 ubiquitin protein ligase 1 [Source:HGNC Symbol;Acc:21033]	-	-	-	-	GO:0005737//cytoplasm;GO:0005783//endoplasmic reticulum;GO:0044444//cytoplasmic part;GO:0044424//intracellular part;GO:0005622//intracellular;GO:0005575//cellular_component;GO:0012505//endomembrane system;GO:0005794//Golgi apparatus;GO:0043226//organelle;GO:0044464//cell part;GO:0043229//intracellular organelle;GO:0043231//intracellular membrane-bounded organelle;GO:0005634//nucleus;GO:0043227//m…	GO:0019899//enzyme binding;GO:0005488//binding;GO:0003824//catalytic activity;GO:0003674//molecular_function;GO:0016874//ligase activity;GO:0005515//protein binding	GO:0044260//cellular macromolecule metabolic process;GO:0008152//metabolic process;GO:0044267//cellular protein metabolic process;GO:0050896//response to stimulus;GO:0044238//primary metabolic process;GO:0034641//cellular nitrogen compound metabolic process;GO:0050794//regulation of cellular process;GO:0006464//cellular protein modification process;GO:0071840//cellular component organization or b…
ENSG00000085465	94	27.6667	2.23333	1.05	-1.71221	0.000738344	0.0136883	down	OVGP1	oviductal glycoprotein 1, 120kDa [Source:HGNC Symbol;Acc:8524]	-	-	-	-	GO:0016023//cytoplasmic, membrane-bounded vesicle;GO:0043226//organelle;GO:0044464//cell part;GO:0031982//vesicle;GO:0044424//intracellular part;GO:0043231//intracellular membrane-bounded organelle;GO:0005829//cytosol;GO:0043229//intracellular organelle;GO:0044444//cytoplasmic part;GO:0043227//membrane-bounded organelle;GO:0005575//cellular_component;GO:0031410//cytoplasmic vesicle;GO:0031988//me…	GO:0003674//molecular_function;GO:0016787//hydrolase activity;GO:0016798//hydrolase activity, acting on glycosyl bonds;GO:0003824//catalytic activity	GO:0071704//organic substance metabolic process;GO:0009056//catabolic process;GO:0044238//primary metabolic process;GO:0000003//reproduction;GO:0008152//metabolic process;GO:0008150//biological_process;GO:0005975//carbohydrate metabolic process
ENSG00000085662	22496.8	9278.19	865.1	471.08	-1.24035	0.00236139	0.0269047	down	AKR1B1	aldo-keto reductase family 1, member B1 (aldose reductase) [Source:HGNC Symbol;Acc:381]	Metabolism	Carbohydrate metabolism;Lipid metabolism	ko00561//Glycerolipid metabolism;ko00040//Pentose and glucuronate interconversions;ko00052//Galactose metabolism;ko00051//Fructose and mannose metabolism	K00011	GO:0043231//intracellular membrane-bounded organelle;GO:0044421//extracellular region part;GO:0005615//extracellular space;GO:0044444//cytoplasmic part;GO:0005622//intracellular;GO:0005737//cytoplasm;GO:0005634//nucleus;GO:0005576//extracellular region;GO:0005829//cytosol;GO:0044464//cell part;GO:0043226//organelle;GO:0005575//cellular_component;GO:0005623//cell;GO:0043229//intracellular organell…	GO:0003674//molecular_function;GO:0003824//catalytic activity;GO:0016491//oxidoreductase activity	GO:0044237//cellular metabolic process;GO:0050896//response to stimulus;GO:0005975//carbohydrate metabolic process;GO:0051186//cofactor metabolic process;GO:0009987//cellular process;GO:0006950//response to stress;GO:0006629//lipid metabolic process;GO:0071704//organic substance metabolic process;GO:0008150//biological_process;GO:0044699//single-organism process;GO:0044710//single-organism metabo…
ENSG00000086061	6275.67	2118	182.023	64.0667	-1.53969	2.93587e-05	0.00236083	down	DNAJA1	DnaJ (Hsp40) homolog, subfamily A, member 1 [Source:HGNC Symbol;Acc:5229]	Genetic Information Processing	Folding, sorting and degradation	ko04141//Protein processing in endoplasmic reticulum	K09502	GO:0005575//cellular_component	GO:0005515//protein binding;GO:0003674//molecular_function;GO:0043167//ion binding;GO:0005488//binding;GO:0051082//unfolded protein binding	GO:0007165//signal transduction;GO:0050794//regulation of cellular process;GO:0050789//regulation of biological process;GO:0006457//protein folding;GO:0006950//response to stress;GO:0023052//signaling;GO:0009987//cellular process;GO:0050896//response to stimulus;GO:0044700//single organism signaling;GO:0040011//locomotion;GO:0008150//biological_process;GO:0006928//movement of cell or subcellular …
ENSG00000086102	750.333	1615.16	9.78	24.41	1.13091	0.00457375	0.0392008	up	NFX1	nuclear transcription factor, X-box binding 1 [Source:HGNC Symbol;Acc:7803]	-	-	-	-	GO:0044464//cell part;GO:0005623//cell;GO:0043226//organelle;GO:0043227//membrane-bounded organelle;GO:0005575//cellular_component;GO:0044424//intracellular part;GO:0005622//intracellular;GO:0043229//intracellular organelle;GO:0005634//nucleus;GO:0043231//intracellular membrane-bounded organelle	GO:0001071//nucleic acid binding transcription factor activity;GO:0003824//catalytic activity;GO:0097159//organic cyclic compound binding;GO:0005488//binding;GO:0043167//ion binding;GO:0003676//nucleic acid binding;GO:0003674//molecular_function;GO:0003677//DNA binding;GO:1901363//heterocyclic compound binding;GO:0016874//ligase activity	GO:0006950//response to stress;GO:0008150//biological_process;GO:0044419//interspecies interaction between organisms;GO:0051704//multi-organism process;GO:0008152//metabolic process;GO:0044403//symbiosis, encompassing mutualism through parasitism;GO:0006807//nitrogen compound metabolic process;GO:0034641//cellular nitrogen compound metabolic process;GO:0009058//biosynthetic process;GO:0050896//re…
ENSG00000086504	3555.33	1070.67	199.867	93.72	-1.66643	0.00172157	0.0223446	down	MRPL28	mitochondrial ribosomal protein L28 [Source:HGNC Symbol;Acc:14484]	Genetic Information Processing	Translation	ko03010//Ribosome	K02902	GO:0043231//intracellular membrane-bounded organelle;GO:0043227//membrane-bounded organelle;GO:0044464//cell part;GO:0044424//intracellular part;GO:0032991//macromolecular complex;GO:0043229//intracellular organelle;GO:0005622//intracellular;GO:0030529//intracellular ribonucleoprotein complex;GO:0044444//cytoplasmic part;GO:0005840//ribosome;GO:0043228//non-membrane-bounded organelle;GO:0005623//…	GO:0005198//structural molecule activity;GO:0003674//molecular_function;GO:0003735//structural constituent of ribosome	GO:0009059//macromolecule biosynthetic process;GO:0044267//cellular protein metabolic process;GO:1901566//organonitrogen compound biosynthetic process;GO:0008152//metabolic process;GO:1901564//organonitrogen compound metabolic process;GO:0044249//cellular biosynthetic process;GO:0044271//cellular nitrogen compound biosynthetic process;GO:0044237//cellular metabolic process;GO:0034641//cellular ni…
ENSG00000086506	15	1	2.73	0.31	-3.65542	0.00450166	0.0388035	down	HBQ1	hemoglobin, theta 1 [Source:HGNC Symbol;Acc:4833]	-	-	-	-	GO:0005622//intracellular;GO:0005737//cytoplasm;GO:0005829//cytosol;GO:0005575//cellular_component;GO:0043234//protein complex;GO:0044424//intracellular part;GO:0044444//cytoplasmic part;GO:0032991//macromolecular complex;GO:0044464//cell part;GO:0005623//cell	GO:0003674//molecular_function;GO:0043167//ion binding;GO:0005488//binding	GO:0006810//transport;GO:0008150//biological_process;GO:0051234//establishment of localization;GO:0051179//localization
ENSG00000087074	8462.33	3203	178.807	84.9733	-1.36448	0.000372121	0.00941648	down	PPP1R15A	-	Genetic Information Processing	Folding, sorting and degradation	ko04141//Protein processing in endoplasmic reticulum	K14019	GO:0005783//endoplasmic reticulum;GO:0005623//cell;GO:0043231//intracellular membrane-bounded organelle;GO:0044464//cell part;GO:0005737//cytoplasm;GO:0043226//organelle;GO:0005575//cellular_component;GO:0012505//endomembrane system;GO:0005622//intracellular;GO:0043227//membrane-bounded organelle;GO:0044424//intracellular part;GO:0044444//cytoplasmic part;GO:0043229//intracellular organelle;GO:00…	GO:0003674//molecular_function;GO:0005488//binding;GO:0005515//protein binding;GO:0019899//enzyme binding	GO:0006950//response to stress;GO:0023052//signaling;GO:0044699//single-organism process;GO:0009987//cellular process;GO:0050896//response to stimulus;GO:0007165//signal transduction;GO:0044763//single-organism cellular process;GO:0007154//cell communication;GO:0044700//single organism signaling;GO:0007049//cell cycle;GO:0065007//biological regulation;GO:0008219//cell death;GO:0051716//cellular r…
ENSG00000087086	38073	11419	2864.86	1198.82	-1.67725	0.00101761	0.0165837	down	FTL	ferritin, light polypeptide [Source:HGNC Symbol;Acc:3999]	Organismal Systems	Digestive system	ko04978//Mineral absorption	K13625	GO:0044464//cell part;GO:0005829//cytosol;GO:0032991//macromolecular complex;GO:0005737//cytoplasm;GO:0043234//protein complex;GO:0005622//intracellular;GO:0005623//cell;GO:0044424//intracellular part;GO:0044444//cytoplasmic part;GO:0005575//cellular_component	GO:0043167//ion binding;GO:0003674//molecular_function;GO:0005488//binding	GO:0051234//establishment of localization;GO:0055085//transmembrane transport;GO:0016192//vesicle-mediated transport;GO:0044699//single-organism process;GO:0008150//biological_process;GO:0008219//cell death;GO:0009987//cellular process;GO:0042592//homeostatic process;GO:0006810//transport;GO:0065007//biological regulation;GO:0051179//localization;GO:0044763//single-organism cellular process;GO:00…
ENSG00000087088	1717.33	440.667	134.887	50.9233	-1.89957	0.00065956	0.0129401	down	BAX	BCL2-associated X protein [Source:HGNC Symbol;Acc:959]	Genetic Information Processing;Cellular Processes;Organismal Systems;Environmental Information Processing;Human Diseases	Endocrine and metabolic diseases;Nervous system;Cell growth and death;Infectious diseases;Cancers;Neurodegenerative diseases;Signal transduction;Folding, sorting and degradation	ko05203//Viral carcinogenesis;ko05200//Pathways in cancer;ko05166//HTLV-I infection;ko05152//Tuberculosis;ko05016//Huntington's disease;ko04141//Protein processing in endoplasmic reticulum;ko04932//Non-alcoholic fatty liver disease (NAFLD);ko05161//Hepatitis B;ko04722//Neurotrophin signaling pathway;ko04071//Sphingolipid signaling pathway;ko04210//Apoptosis;ko04115//p53 signaling pathway;ko05210/…	K02159	GO:0032991//macromolecular complex;GO:0043226//organelle;GO:0005575//cellular_component;GO:0043227//membrane-bounded organelle;GO:0044444//cytoplasmic part;GO:0043229//intracellular organelle;GO:0044424//intracellular part;GO:0044464//cell part;GO:0043234//protein complex;GO:0043231//intracellular membrane-bounded organelle;GO:0005623//cell;GO:0005737//cytoplasm;GO:0012505//endomembrane system;GO…	GO:0003674//molecular_function;GO:0022857//transmembrane transporter activity;GO:0008289//lipid binding;GO:0005215//transporter activity;GO:0005488//binding	GO:0040011//locomotion;GO:0002376//immune system process;GO:0071840//cellular component organization or biogenesis;GO:0048869//cellular developmental process;GO:0006461//protein complex assembly;GO:0044767//single-organism developmental process;GO:0071704//organic substance metabolic process;GO:0048856//anatomical structure development;GO:0051674//localization of cell;GO:0051704//multi-organism p…
ENSG00000087191	9600.33	3649.33	397.093	183.433	-1.34811	0.00214502	0.0254157	down	PSMC5	proteasome (prosome, macropain) 26S subunit, ATPase, 5 [Source:HGNC Symbol;Acc:9552]	Genetic Information Processing;Human Diseases	Infectious diseases;Folding, sorting and degradation	ko05169//Epstein-Barr virus infection;ko03050//Proteasome	K03066	GO:0044428//nuclear part;GO:0044446//intracellular organelle part;GO:0005623//cell;GO:0043229//intracellular organelle;GO:0005654//nucleoplasm;GO:0044424//intracellular part;GO:0005622//intracellular;GO:0044464//cell part;GO:0005575//cellular_component;GO:0005634//nucleus;GO:0044422//organelle part;GO:0031981//nuclear lumen;GO:0044444//cytoplasmic part;GO:0043231//intracellular membrane-bounded o…	GO:0008134//transcription factor binding;GO:0017111//nucleoside-triphosphatase activity;GO:0005515//protein binding;GO:0016787//hydrolase activity;GO:0016817//hydrolase activity, acting on acid anhydrides;GO:0005488//binding;GO:0003824//catalytic activity;GO:0043167//ion binding;GO:0016462//pyrophosphatase activity;GO:0004386//helicase activity;GO:0000988//transcription factor activity, protein b…	GO:0044710//single-organism metabolic process;GO:0051704//multi-organism process;GO:0043412//macromolecule modification;GO:0019538//protein metabolic process;GO:0071704//organic substance metabolic process;GO:0044237//cellular metabolic process;GO:0044419//interspecies interaction between organisms;GO:0044700//single organism signaling;GO:0006725//cellular aromatic compound metabolic process;GO:0…
ENSG00000087266	713.667	2108.67	12.17	39.7933	1.59918	1.3768e-05	0.00139946	up	SH3BP2	SH3-domain binding protein 2 [Source:HGNC Symbol;Acc:10825]	Organismal Systems	Immune system	ko04650//Natural killer cell mediated cytotoxicity	K07984	-	GO:0060090//binding, bridging;GO:0005488//binding;GO:0003674//molecular_function;GO:0005515//protein binding;GO:0030674//protein binding, bridging	GO:0023052//signaling;GO:0007154//cell communication;GO:0065007//biological regulation;GO:0050896//response to stimulus;GO:0044763//single-organism cellular process;GO:0007165//signal transduction;GO:0044700//single organism signaling;GO:0009987//cellular process;GO:0044699//single-organism process;GO:0008150//biological_process;GO:0050794//regulation of cellular process;GO:0051716//cellular resp…
ENSG00000087884	324.333	81.6667	62.7533	23.1033	-1.93799	0.000776138	0.0140604	down	AAMDC	adipogenesis associated, Mth938 domain containing [Source:HGNC Symbol;Acc:30205]	-	-	-	-	GO:0044464//cell part;GO:0044424//intracellular part;GO:0005623//cell;GO:0005575//cellular_component;GO:0005737//cytoplasm;GO:0005622//intracellular	-	GO:0008150//biological_process
ENSG00000088356	2207.33	645.667	87.4433	33.7033	-1.72964	0.000206866	0.00715513	down	PDRG1	p53 and DNA-damage regulated 1 [Source:HGNC Symbol;Acc:16119]	-	-	-	-	GO:0032991//macromolecular complex;GO:0005575//cellular_component;GO:0005623//cell;GO:0044424//intracellular part;GO:0005737//cytoplasm;GO:0005622//intracellular;GO:0044464//cell part;GO:0043234//protein complex	GO:0003674//molecular_function;GO:0005488//binding;GO:0051082//unfolded protein binding;GO:0005515//protein binding	GO:0009987//cellular process;GO:0008150//biological_process;GO:0006457//protein folding
ENSG00000088727	96.3333	34	7.54	3.82667	-1.46592	0.00447702	0.0386648	down	KIF9	kinesin family member 9 [Source:HGNC Symbol;Acc:16666]	-	-	-	-	GO:0043232//intracellular non-membrane-bounded organelle;GO:0005623//cell;GO:0043226//organelle;GO:0044464//cell part;GO:0005622//intracellular;GO:0043229//intracellular organelle;GO:0043228//non-membrane-bounded organelle;GO:0005575//cellular_component;GO:0005737//cytoplasm;GO:0044424//intracellular part;GO:0032991//macromolecular complex;GO:0005856//cytoskeleton;GO:0043234//protein complex	GO:0043167//ion binding;GO:0008092//cytoskeletal protein binding;GO:0005488//binding;GO:0005515//protein binding;GO:0003674//molecular_function	GO:0050896//response to stimulus;GO:0008150//biological_process;GO:0006950//response to stress
ENSG00000088854	332	824	2.56	7.12333	1.33116	0.00600519	0.045961	up	C20orf194	-	-	-	-	-	-	-	-
ENSG00000088986	5262.67	2023	600.083	310.497	-1.33894	0.00263068	0.0285524	down	DYNLL1	dynein, light chain, LC8-type 1 [Source:HGNC Symbol;Acc:15476]	Organismal Systems	Excretory system	ko04962//Vasopressin-regulated water reabsorption	K10418	GO:0005737//cytoplasm;GO:0044444//cytoplasmic part;GO:0032991//macromolecular complex;GO:0005575//cellular_component;GO:0071944//cell periphery;GO:0043234//protein complex;GO:0015630//microtubule cytoskeleton;GO:0044422//organelle part;GO:0044446//intracellular organelle part;GO:0043232//intracellular non-membrane-bounded organelle;GO:0044430//cytoskeletal part;GO:0005739//mitochondrion;GO:000585…	GO:0030234//enzyme regulator activity;GO:0005488//binding;GO:0005515//protein binding;GO:0098772//molecular function regulator;GO:0019899//enzyme binding;GO:0003674//molecular_function	GO:0006810//transport;GO:0023052//signaling;GO:0006996//organelle organization;GO:0050896//response to stimulus;GO:0044419//interspecies interaction between organisms;GO:0050794//regulation of cellular process;GO:0051704//multi-organism process;GO:0071840//cellular component organization or biogenesis;GO:0009987//cellular process;GO:0008152//metabolic process;GO:0034641//cellular nitrogen compoun…
ENSG00000089009	48182.3	20875.7	3365.05	1905.23	-1.16344	0.00608638	0.0462686	down	RPL6	ribosomal protein L6 [Source:HGNC Symbol;Acc:10362]	Genetic Information Processing	Translation	ko03010//Ribosome	K02934	GO:0005623//cell;GO:0043228//non-membrane-bounded organelle;GO:0005622//intracellular;GO:0030529//intracellular ribonucleoprotein complex;GO:0044444//cytoplasmic part;GO:0043229//intracellular organelle;GO:0043226//organelle;GO:0005575//cellular_component;GO:0043232//intracellular non-membrane-bounded organelle;GO:0044424//intracellular part;GO:0005737//cytoplasm;GO:0044464//cell part;GO:1990904/…	GO:0097159//organic cyclic compound binding;GO:0003676//nucleic acid binding;GO:1901363//heterocyclic compound binding;GO:0003677//DNA binding;GO:0003735//structural constituent of ribosome;GO:0003723//RNA binding;GO:0005488//binding;GO:0003674//molecular_function;GO:0005198//structural molecule activity	GO:0009059//macromolecule biosynthetic process;GO:0009987//cellular process;GO:1901360//organic cyclic compound metabolic process;GO:1901576//organic substance biosynthetic process;GO:0043043//peptide biosynthetic process;GO:0009058//biosynthetic process;GO:0043170//macromolecule metabolic process;GO:0044248//cellular catabolic process;GO:1901575//organic substance catabolic process;GO:0034613//c…
ENSG00000089157	78096.7	30062.7	3784.62	2066.54	-1.3271	0.00404626	0.0363682	down	RPLP0	ribosomal protein, large, P0 [Source:HGNC Symbol;Acc:10371]	Genetic Information Processing	Translation	ko03010//Ribosome	K02941	GO:0043231//intracellular membrane-bounded organelle;GO:0032991//macromolecular complex;GO:0043227//membrane-bounded organelle;GO:0005737//cytoplasm;GO:0044464//cell part;GO:0005622//intracellular;GO:0044424//intracellular part;GO:0005575//cellular_component;GO:0005829//cytosol;GO:0043232//intracellular non-membrane-bounded organelle;GO:0030529//intracellular ribonucleoprotein complex;GO:0044444/…	GO:0005198//structural molecule activity;GO:0097159//organic cyclic compound binding;GO:0003723//RNA binding;GO:0005488//binding;GO:1901363//heterocyclic compound binding;GO:0003676//nucleic acid binding;GO:0003735//structural constituent of ribosome;GO:0003674//molecular_function	GO:0034655//nucleobase-containing compound catabolic process;GO:0006810//transport;GO:0044267//cellular protein metabolic process;GO:0008150//biological_process;GO:0019439//aromatic compound catabolic process;GO:0071702//organic substance transport;GO:0051234//establishment of localization;GO:0033036//macromolecule localization;GO:0044260//cellular macromolecule metabolic process;GO:0009056//cata…
ENSG00000089248	8280	3363	265.773	136.677	-1.26167	0.00316553	0.0316158	down	ERP29	endoplasmic reticulum protein 29 [Source:HGNC Symbol;Acc:13799]	Genetic Information Processing	Folding, sorting and degradation	ko04141//Protein processing in endoplasmic reticulum	K09586	GO:0005783//endoplasmic reticulum;GO:0031982//vesicle;GO:0005623//cell;GO:0043226//organelle;GO:0044464//cell part;GO:0005575//cellular_component;GO:0005622//intracellular;GO:0043229//intracellular organelle;GO:0012505//endomembrane system;GO:0005737//cytoplasm;GO:0097708//intracellular vesicle;GO:0043227//membrane-bounded organelle;GO:0031410//cytoplasmic vesicle;GO:0043231//intracellular membra…	GO:0003674//molecular_function;GO:0003824//catalytic activity;GO:0016853//isomerase activity	GO:0008150//biological_process;GO:0051179//localization;GO:0009987//cellular process;GO:0006457//protein folding;GO:0006810//transport;GO:0051234//establishment of localization
ENSG00000089327	4483.33	1259.67	333.543	129.817	-1.76976	0.000702346	0.013364	down	FXYD5	-	-	-	-	-	GO:0005575//cellular_component	GO:0005515//protein binding;GO:0008092//cytoskeletal protein binding;GO:0005488//binding;GO:0022857//transmembrane transporter activity;GO:0003674//molecular_function;GO:0005215//transporter activity	GO:0071840//cellular component organization or biogenesis;GO:0051234//establishment of localization;GO:0016043//cellular component organization;GO:0044085//cellular component biogenesis;GO:0009987//cellular process;GO:0051179//localization;GO:0022607//cellular component assembly;GO:0008150//biological_process;GO:0006810//transport
ENSG00000089335	334.333	732	7.16	18.8533	1.14985	0.00374809	0.0345638	up	ZNF302	zinc finger protein 302 [Source:HGNC Symbol;Acc:13848]	-	-	-	-	GO:0005634//nucleus;GO:0043227//membrane-bounded organelle;GO:0043229//intracellular organelle;GO:0005575//cellular_component;GO:0043226//organelle;GO:0044464//cell part;GO:0005623//cell;GO:0044424//intracellular part;GO:0005622//intracellular;GO:0043231//intracellular membrane-bounded organelle	GO:0003676//nucleic acid binding;GO:0043167//ion binding;GO:0005488//binding;GO:1901363//heterocyclic compound binding;GO:0097159//organic cyclic compound binding;GO:0003677//DNA binding;GO:0003674//molecular_function	GO:0044237//cellular metabolic process;GO:0009987//cellular process;GO:0009058//biosynthetic process;GO:0034641//cellular nitrogen compound metabolic process;GO:0008152//metabolic process;GO:0006807//nitrogen compound metabolic process;GO:0008150//biological_process
ENSG00000089685	8818.93	3116.16	168.04	78.4767	-1.45784	0.000821263	0.0145109	down	BIRC5	baculoviral IAP repeat containing 5 [Source:HGNC Symbol;Acc:593]	Environmental Information Processing;Human Diseases	Signal transduction;Infectious diseases;Cancers	ko05200//Pathways in cancer;ko05161//Hepatitis B;ko04390//Hippo signaling pathway;ko05210//Colorectal cancer	K08731	GO:0044464//cell part;GO:0043234//protein complex;GO:0044428//nuclear part;GO:0044430//cytoskeletal part;GO:0043226//organelle;GO:0044444//cytoplasmic part;GO:0044422//organelle part;GO:0044446//intracellular organelle part;GO:0005856//cytoskeleton;GO:0000228//nuclear chromosome;GO:0043231//intracellular membrane-bounded organelle;GO:0043233//organelle lumen;GO:0005737//cytoplasm;GO:0005634//nucl…	GO:0003674//molecular_function;GO:0005515//protein binding;GO:0030234//enzyme regulator activity;GO:0008092//cytoskeletal protein binding;GO:0098772//molecular function regulator;GO:0005488//binding;GO:0019899//enzyme binding;GO:0043167//ion binding	GO:0016043//cellular component organization;GO:0000278//mitotic cell cycle;GO:0044238//primary metabolic process;GO:0048856//anatomical structure development;GO:0044707//single-multicellular organism process;GO:0071840//cellular component organization or biogenesis;GO:0007010//cytoskeleton organization;GO:0008150//biological_process;GO:0032502//developmental process;GO:0019538//protein metabolic …
ENSG00000089692	66.3333	11.6667	2.09333	0.48	-2.4515	1.35626e-05	0.00138638	down	LAG3	lymphocyte-activation gene 3 [Source:HGNC Symbol;Acc:6476]	-	-	-	-	GO:0016020//membrane;GO:0005886//plasma membrane;GO:0071944//cell periphery;GO:0005575//cellular_component;GO:0044464//cell part;GO:0005623//cell	GO:0003674//molecular_function;GO:0004871//signal transducer activity	GO:0009987//cellular process;GO:0008150//biological_process;GO:0050794//regulation of cellular process;GO:0050789//regulation of biological process;GO:0044699//single-organism process;GO:0007154//cell communication;GO:0050896//response to stimulus;GO:0065007//biological regulation;GO:0007165//signal transduction;GO:0044700//single organism signaling;GO:0051716//cellular response to stimulus;GO:00…
ENSG00000089775	116.357	330.877	1.66	5.63667	1.53455	5.02634e-05	0.00335578	up	ZBTB25	zinc finger and BTB domain containing 25 [Source:HGNC Symbol;Acc:13112]	-	-	-	-	GO:0043229//intracellular organelle;GO:0043227//membrane-bounded organelle;GO:0044424//intracellular part;GO:0044464//cell part;GO:0043231//intracellular membrane-bounded organelle;GO:0005575//cellular_component;GO:0005622//intracellular;GO:0043226//organelle;GO:0005634//nucleus;GO:0005737//cytoplasm;GO:0005623//cell	GO:0043167//ion binding;GO:0003677//DNA binding;GO:1901363//heterocyclic compound binding;GO:0005488//binding;GO:0097159//organic cyclic compound binding;GO:0003676//nucleic acid binding;GO:0001071//nucleic acid binding transcription factor activity;GO:0003674//molecular_function	GO:0044237//cellular metabolic process;GO:0034641//cellular nitrogen compound metabolic process;GO:0006807//nitrogen compound metabolic process;GO:0008150//biological_process;GO:0009058//biosynthetic process;GO:0009987//cellular process;GO:0008152//metabolic process
ENSG00000089916	521.667	1522	5.12667	17.0967	1.57318	0.00101832	0.0165837	up	GPATCH2L	G patch domain containing 2-like [Source:HGNC Symbol;Acc:20210]	-	-	-	-	-	GO:0003674//molecular_function	-
ENSG00000090266	2727.84	446.203	653.237	164.76	-2.55169	6.08566e-05	0.00374579	down	NDUFB2	NADH dehydrogenase (ubiquinone) 1 beta subcomplex, 2, 8kDa [Source:HGNC Symbol;Acc:7697]	Metabolism;Human Diseases	Endocrine and metabolic diseases;Energy metabolism;Neurodegenerative diseases	ko05016//Huntington's disease;ko05010//Alzheimer's disease;ko04932//Non-alcoholic fatty liver disease (NAFLD);ko00190//Oxidative phosphorylation;ko05012//Parkinson's disease	K03958	GO:0043229//intracellular organelle;GO:0043226//organelle;GO:0044424//intracellular part;GO:0005737//cytoplasm;GO:0044444//cytoplasmic part;GO:0005575//cellular_component;GO:0005739//mitochondrion;GO:0032991//macromolecular complex;GO:0005622//intracellular;GO:0043234//protein complex;GO:0005623//cell;GO:0043227//membrane-bounded organelle;GO:0043231//intracellular membrane-bounded organelle;GO:0…	GO:0003824//catalytic activity;GO:0003674//molecular_function;GO:0016491//oxidoreductase activity	GO:0008152//metabolic process;GO:0044710//single-organism metabolic process;GO:0044237//cellular metabolic process;GO:0006091//generation of precursor metabolites and energy;GO:0009987//cellular process;GO:0044699//single-organism process;GO:0044281//small molecule metabolic process;GO:0008150//biological_process
ENSG00000090273	7652.34	2248.95	213.853	84.3867	-1.7123	0.000308175	0.00871221	down	NUDC	nudC nuclear distribution protein [Source:HGNC Symbol;Acc:8045]	-	-	-	-	GO:0043228//non-membrane-bounded organelle;GO:0005654//nucleoplasm;GO:0044446//intracellular organelle part;GO:0043233//organelle lumen;GO:0044424//intracellular part;GO:0043227//membrane-bounded organelle;GO:0005623//cell;GO:0005737//cytoplasm;GO:0044422//organelle part;GO:0044444//cytoplasmic part;GO:0044428//nuclear part;GO:0005829//cytosol;GO:0043234//protein complex;GO:0043229//intracellular…	-	GO:0008150//biological_process;GO:0071840//cellular component organization or biogenesis;GO:0006996//organelle organization;GO:0044699//single-organism process;GO:0000278//mitotic cell cycle;GO:0048285//organelle fission;GO:0009987//cellular process;GO:1903047//mitotic cell cycle process;GO:0022402//cell cycle process;GO:0016043//cellular component organization;GO:0008283//cell proliferation;GO:0…
ENSG00000090674	846.667	359.333	25.9733	12.1333	-1.18653	0.00431172	0.0377599	down	MCOLN1	mucolipin 1 [Source:HGNC Symbol;Acc:13356]	Cellular Processes	Transport and catabolism	ko04142//Lysosome	K04992	GO:0005764//lysosome;GO:0044424//intracellular part;GO:0012505//endomembrane system;GO:0005623//cell;GO:0043226//organelle;GO:0005575//cellular_component;GO:0044444//cytoplasmic part;GO:0043227//membrane-bounded organelle;GO:0071944//cell periphery;GO:0000323//lytic vacuole;GO:0016020//membrane;GO:0043231//intracellular membrane-bounded organelle;GO:0043229//intracellular organelle;GO:0005768//en…	GO:0005215//transporter activity;GO:0022857//transmembrane transporter activity;GO:0003674//molecular_function	GO:0065008//regulation of biological quality;GO:0055085//transmembrane transport;GO:0051179//localization;GO:0006810//transport;GO:0042592//homeostatic process;GO:0008150//biological_process;GO:0051234//establishment of localization;GO:0065007//biological regulation
ENSG00000090932	103.333	28.6667	2.31333	0.856667	-1.77767	0.00261765	0.0284623	down	DLL3	delta-like 3 (Drosophila) [Source:HGNC Symbol;Acc:2909]	Environmental Information Processing	Signal transduction	ko04330//Notch signaling pathway	K06051	GO:0005575//cellular_component	GO:0003674//molecular_function;GO:0043167//ion binding;GO:0005488//binding	GO:0007165//signal transduction;GO:0048856//anatomical structure development;GO:0032502//developmental process;GO:0032501//multicellular organismal process;GO:0044767//single-organism developmental process;GO:0009653//anatomical structure morphogenesis;GO:0023052//signaling;GO:0044700//single organism signaling;GO:0065007//biological regulation;GO:0030154//cell differentiation;GO:0008150//biologi…
ENSG00000090971	704.667	190.667	24.4033	9.21	-1.8184	0.00205723	0.0248609	down	NAT14	N-acetyltransferase 14 (GCN5-related, putative) [Source:HGNC Symbol;Acc:28918]	-	-	-	-	GO:0044424//intracellular part;GO:0043227//membrane-bounded organelle;GO:0043226//organelle;GO:0043229//intracellular organelle;GO:0043231//intracellular membrane-bounded organelle;GO:0005623//cell;GO:0005622//intracellular;GO:0044464//cell part;GO:0005575//cellular_component;GO:0005634//nucleus	GO:0097159//organic cyclic compound binding;GO:0003676//nucleic acid binding;GO:0016740//transferase activity;GO:0016746//transferase activity, transferring acyl groups;GO:0005488//binding;GO:1901363//heterocyclic compound binding;GO:0003824//catalytic activity;GO:0003677//DNA binding;GO:0003674//molecular_function	GO:0006807//nitrogen compound metabolic process;GO:0034641//cellular nitrogen compound metabolic process;GO:0009987//cellular process;GO:0044237//cellular metabolic process;GO:0009058//biosynthetic process;GO:0008150//biological_process;GO:0008152//metabolic process
ENSG00000091640	1152	456.667	69.2733	37.6433	-1.27945	0.00612818	0.0463888	down	SPAG7	sperm associated antigen 7 [Source:HGNC Symbol;Acc:11216]	-	-	-	-	GO:0005623//cell;GO:0044464//cell part;GO:0043231//intracellular membrane-bounded organelle;GO:0005634//nucleus;GO:0005622//intracellular;GO:0043229//intracellular organelle;GO:0043226//organelle;GO:0005575//cellular_component;GO:0044424//intracellular part;GO:0043227//membrane-bounded organelle	GO:0003674//molecular_function	-
ENSG00000091656	12.3333	45.3333	0.04	0.286667	1.88477	0.000454093	0.0105505	up	ZFHX4	zinc finger homeobox 4 [Source:HGNC Symbol;Acc:30939]	-	-	-	-	GO:0043229//intracellular organelle;GO:0043231//intracellular membrane-bounded organelle;GO:0005622//intracellular;GO:0043226//organelle;GO:0044424//intracellular part;GO:0005575//cellular_component;GO:0044464//cell part;GO:0043227//membrane-bounded organelle;GO:0005634//nucleus;GO:0005623//cell	GO:1901363//heterocyclic compound binding;GO:0008092//cytoskeletal protein binding;GO:0003676//nucleic acid binding;GO:0097159//organic cyclic compound binding;GO:0003677//DNA binding;GO:0003674//molecular_function;GO:0001071//nucleic acid binding transcription factor activity;GO:0043167//ion binding;GO:0005488//binding;GO:0005515//protein binding	GO:0007010//cytoskeleton organization;GO:0034641//cellular nitrogen compound metabolic process;GO:0071840//cellular component organization or biogenesis;GO:0009058//biosynthetic process;GO:0016043//cellular component organization;GO:0006807//nitrogen compound metabolic process;GO:0009987//cellular process;GO:0006996//organelle organization;GO:0008152//metabolic process;GO:0044237//cellular metabo…
ENSG00000092010	2406	998	153.953	85.1	-1.2229	0.00419755	0.0371012	down	PSME1	proteasome (prosome, macropain) activator subunit 1 (PA28 alpha) [Source:HGNC Symbol;Acc:9568]	Genetic Information Processing;Organismal Systems	Immune system;Folding, sorting and degradation	ko04612//Antigen processing and presentation;ko03050//Proteasome	K06696	GO:0005575//cellular_component;GO:0005829//cytosol;GO:0043226//organelle;GO:0005634//nucleus;GO:0032991//macromolecular complex;GO:0070013//intracellular organelle lumen;GO:0031981//nuclear lumen;GO:0044444//cytoplasmic part;GO:0043234//protein complex;GO:0043231//intracellular membrane-bounded organelle;GO:0005622//intracellular;GO:0005654//nucleoplasm;GO:0005623//cell;GO:0031974//membrane-enclo…	GO:0098772//molecular function regulator;GO:0030234//enzyme regulator activity;GO:0003674//molecular_function	GO:0019538//protein metabolic process;GO:0023052//signaling;GO:0044281//small molecule metabolic process;GO:0034641//cellular nitrogen compound metabolic process;GO:0036211//protein modification process;GO:0051716//cellular response to stimulus;GO:0071704//organic substance metabolic process;GO:0007049//cell cycle;GO:0007165//signal transduction;GO:0008219//cell death;GO:0009987//cellular process…
ENSG00000092621	1286	413.333	34.6867	14.4367	-1.59603	0.000180607	0.00663528	down	PHGDH	phosphoglycerate dehydrogenase [Source:HGNC Symbol;Acc:8923]	Metabolism	Amino acid metabolism;Global and Overview	ko01200//Carbon metabolism;ko01230//Biosynthesis of amino acids;ko00260//Glycine, serine and threonine metabolism	K00058	GO:0005623//cell;GO:0005829//cytosol;GO:0044424//intracellular part;GO:0044444//cytoplasmic part;GO:0005575//cellular_component;GO:0005622//intracellular;GO:0044464//cell part;GO:0005737//cytoplasm	GO:0003824//catalytic activity;GO:0016491//oxidoreductase activity;GO:0003674//molecular_function	GO:0044238//primary metabolic process;GO:1901564//organonitrogen compound metabolic process;GO:0006520//cellular amino acid metabolic process;GO:0044707//single-multicellular organism process;GO:0048869//cellular developmental process;GO:0071704//organic substance metabolic process;GO:0006807//nitrogen compound metabolic process;GO:0009058//biosynthetic process;GO:0007275//multicellular organism …
ENSG00000092841	30936.9	7190.45	3638.26	1183.1	-2.04332	0.000234053	0.00758911	down	MYL6	myosin, light chain 6, alkali, smooth muscle and non-muscle [Source:HGNC Symbol;Acc:7587]	Organismal Systems	Circulatory system;Endocrine system	ko04921//Oxytocin signaling pathway;ko04270//Vascular smooth muscle contraction	K12751	GO:0044444//cytoplasmic part;GO:0043229//intracellular organelle;GO:0032991//macromolecular complex;GO:0005623//cell;GO:0044424//intracellular part;GO:0043232//intracellular non-membrane-bounded organelle;GO:0043234//protein complex;GO:0043228//non-membrane-bounded organelle;GO:0005737//cytoplasm;GO:0043226//organelle;GO:0005856//cytoskeleton;GO:0044464//cell part;GO:0005622//intracellular;GO:000…	GO:0016818//hydrolase activity, acting on acid anhydrides, in phosphorus-containing anhydrides;GO:0003824//catalytic activity;GO:0016462//pyrophosphatase activity;GO:0043167//ion binding;GO:0005488//binding;GO:0017111//nucleoside-triphosphatase activity;GO:0016787//hydrolase activity;GO:0016817//hydrolase activity, acting on acid anhydrides;GO:0003674//molecular_function;GO:0016887//ATPase activi…	GO:0040011//locomotion;GO:0000902//cell morphogenesis;GO:0048869//cellular developmental process;GO:0016043//cellular component organization;GO:0044763//single-organism cellular process;GO:0044699//single-organism process;GO:0032502//developmental process;GO:0008150//biological_process;GO:0044767//single-organism developmental process;GO:0009987//cellular process;GO:0030154//cell differentiation;…
ENSG00000095380	3570.86	1069.33	175.607	71.3267	-1.68319	0.000467433	0.0106784	down	NANS	N-acetylneuraminic acid synthase [Source:HGNC Symbol;Acc:19237]	Metabolism	Carbohydrate metabolism	ko00520//Amino sugar and nucleotide sugar metabolism	K05304	GO:0044444//cytoplasmic part;GO:0005575//cellular_component;GO:0044424//intracellular part;GO:0005737//cytoplasm;GO:0005623//cell;GO:0005622//intracellular;GO:0005829//cytosol;GO:0044464//cell part	GO:0003824//catalytic activity;GO:0016779//nucleotidyltransferase activity;GO:0016740//transferase activity;GO:0016765//transferase activity, transferring alkyl or aryl (other than methyl) groups;GO:0016772//transferase activity, transferring phosphorus-containing groups;GO:0003674//molecular_function	GO:0009058//biosynthetic process;GO:0006629//lipid metabolic process;GO:0044710//single-organism metabolic process;GO:0044699//single-organism process;GO:0044238//primary metabolic process;GO:0008150//biological_process;GO:0071704//organic substance metabolic process;GO:0005975//carbohydrate metabolic process;GO:0008152//metabolic process
ENSG00000095539	31	78.3333	0.72	1.33	1.36212	0.00238318	0.0270677	up	SEMA4G	sema domain, immunoglobulin domain (Ig), transmembrane domain (TM) and short cytoplasmic domain, (semaphorin) 4G [Source:HGNC Symbol;Acc:10735]	Organismal Systems	Development	ko04360//Axon guidance	K06521	GO:0044464//cell part;GO:0016020//membrane;GO:0005575//cellular_component;GO:0005623//cell;GO:0005886//plasma membrane;GO:0071944//cell periphery	GO:0003674//molecular_function	GO:0044763//single-organism cellular process;GO:0044767//single-organism developmental process;GO:0044699//single-organism process;GO:0009987//cellular process;GO:0048856//anatomical structure development;GO:0032502//developmental process;GO:0048869//cellular developmental process;GO:0030154//cell differentiation;GO:0008150//biological_process
ENSG00000095564	887.667	2942.33	7.91	31.9667	1.74958	0.00312834	0.0314975	up	BTAF1	BTAF1 RNA polymerase II, B-TFIID transcription factor-associated, 170kDa [Source:HGNC Symbol;Acc:17307]	-	-	-	-	GO:0043226//organelle;GO:0043229//intracellular organelle;GO:0005622//intracellular;GO:0005623//cell;GO:0005575//cellular_component;GO:0043227//membrane-bounded organelle;GO:0005634//nucleus;GO:0043231//intracellular membrane-bounded organelle;GO:0044424//intracellular part;GO:0044464//cell part	GO:0016462//pyrophosphatase activity;GO:0004386//helicase activity;GO:0016817//hydrolase activity, acting on acid anhydrides;GO:1901363//heterocyclic compound binding;GO:0003676//nucleic acid binding;GO:0016787//hydrolase activity;GO:0001071//nucleic acid binding transcription factor activity;GO:0003677//DNA binding;GO:0016818//hydrolase activity, acting on acid anhydrides, in phosphorus-containi…	GO:0008150//biological_process
ENSG00000095739	938.667	408.667	26.93	14.36	-1.17156	0.00103038	0.0166414	down	BAMBI	BMP and activin membrane-bound inhibitor [Source:HGNC Symbol;Acc:30251]	Environmental Information Processing	Signal transduction	ko04310//Wnt signaling pathway;ko04350//TGF-beta signaling pathway	K10162	GO:0044424//intracellular part;GO:0016020//membrane;GO:0044464//cell part;GO:0005575//cellular_component;GO:0005622//intracellular;GO:0005737//cytoplasm;GO:0005623//cell;GO:0005886//plasma membrane;GO:0071944//cell periphery	GO:0016740//transferase activity;GO:0004871//signal transducer activity;GO:0003824//catalytic activity;GO:0016301//kinase activity;GO:0003674//molecular_function;GO:0016772//transferase activity, transferring phosphorus-containing groups	GO:0048870//cell motility;GO:0007154//cell communication;GO:0044700//single organism signaling;GO:0040011//locomotion;GO:0050794//regulation of cellular process;GO:0006928//movement of cell or subcellular component;GO:0050896//response to stimulus;GO:0051674//localization of cell;GO:0023052//signaling;GO:0044763//single-organism cellular process;GO:0008150//biological_process;GO:0050789//regulati…
ENSG00000095752	14.6667	1.33333	0.33	0.103333	-3.30414	7.8724e-05	0.00423915	down	IL11	interleukin 11 [Source:HGNC Symbol;Acc:5966]	Organismal Systems;Environmental Information Processing;Human Diseases	Immune system;Signal transduction;Immune diseases;Signaling molecules and interaction	ko04060//Cytokine-cytokine receptor interaction;ko05323//Rheumatoid arthritis;ko04630//Jak-STAT signaling pathway;ko04640//Hematopoietic cell lineage	K05417	GO:0044424//intracellular part;GO:0044421//extracellular region part;GO:0005615//extracellular space;GO:0005737//cytoplasm;GO:0005575//cellular_component;GO:0005576//extracellular region;GO:0044464//cell part;GO:0005623//cell;GO:0005622//intracellular	GO:0003674//molecular_function	GO:0044699//single-organism process;GO:0048869//cellular developmental process;GO:0006950//response to stress;GO:0007154//cell communication;GO:0050896//response to stimulus;GO:0048856//anatomical structure development;GO:0002376//immune system process;GO:0030154//cell differentiation;GO:0032502//developmental process;GO:0044700//single organism signaling;GO:0023052//signaling;GO:0007267//cell-ce…
ENSG00000095906	2238.67	568.667	96.9833	32.6667	-1.91131	0.000728812	0.0135942	down	NUBP2	-	-	-	-	-	GO:0043226//organelle;GO:0043228//non-membrane-bounded organelle;GO:0044446//intracellular organelle part;GO:0043231//intracellular membrane-bounded organelle;GO:0044430//cytoskeletal part;GO:0005737//cytoplasm;GO:0044464//cell part;GO:0005623//cell;GO:0044424//intracellular part;GO:0005815//microtubule organizing center;GO:0005856//cytoskeleton;GO:0043229//intracellular organelle;GO:0015630//mic…	GO:0003674//molecular_function;GO:0005488//binding;GO:0043167//ion binding	GO:0009058//biosynthetic process;GO:0044710//single-organism metabolic process;GO:0022607//cellular component assembly;GO:0009987//cellular process;GO:0008152//metabolic process;GO:0044281//small molecule metabolic process;GO:0044085//cellular component biogenesis;GO:0071840//cellular component organization or biogenesis;GO:0044699//single-organism process;GO:0016043//cellular component organizat…
ENSG00000095951	440.333	1300.33	4.63	12.6067	1.58388	0.00525641	0.0426179	up	HIVEP1	human immunodeficiency virus type I enhancer binding protein 1 [Source:HGNC Symbol;Acc:4920]	-	-	-	-	GO:0005737//cytoplasm;GO:0043226//organelle;GO:0044464//cell part;GO:0005623//cell;GO:0043231//intracellular membrane-bounded organelle;GO:0005622//intracellular;GO:0043227//membrane-bounded organelle;GO:0005634//nucleus;GO:0043229//intracellular organelle;GO:0005575//cellular_component;GO:0044424//intracellular part	GO:0005488//binding;GO:0003674//molecular_function;GO:0003677//DNA binding;GO:0043167//ion binding;GO:1901363//heterocyclic compound binding;GO:0097159//organic cyclic compound binding;GO:0003676//nucleic acid binding	GO:0008152//metabolic process;GO:0009058//biosynthetic process;GO:0008150//biological_process;GO:0034641//cellular nitrogen compound metabolic process;GO:0044237//cellular metabolic process;GO:0006807//nitrogen compound metabolic process;GO:0009987//cellular process
ENSG00000096872	132	266.333	3.40333	8.19333	1.04297	0.00601086	0.0459655	up	IFT74	intraflagellar transport 74 homolog (Chlamydomonas) [Source:HGNC Symbol;Acc:21424]	-	-	-	-	GO:0043228//non-membrane-bounded organelle;GO:0031988//membrane-bounded vesicle;GO:0043227//membrane-bounded organelle;GO:0043226//organelle;GO:0097708//intracellular vesicle;GO:0044430//cytoskeletal part;GO:0044424//intracellular part;GO:0005634//nucleus;GO:0005737//cytoplasm;GO:0016023//cytoplasmic, membrane-bounded vesicle;GO:0042995//cell projection;GO:0031410//cytoplasmic vesicle;GO:0044464/…	GO:0005515//protein binding;GO:0008092//cytoskeletal protein binding;GO:0005488//binding;GO:0003674//molecular_function	GO:0048869//cellular developmental process;GO:0030705//cytoskeleton-dependent intracellular transport;GO:0044763//single-organism cellular process;GO:0022607//cellular component assembly;GO:0000902//cell morphogenesis;GO:0032989//cellular component morphogenesis;GO:0044699//single-organism process;GO:0006810//transport;GO:0046907//intracellular transport;GO:0071840//cellular component organizatio…
ENSG00000097021	4426.67	1880	165.787	88.8167	-1.19173	0.00497027	0.0412662	down	ACOT7	-	Metabolism	Lipid metabolism	ko00062//Fatty acid elongation;ko01040//Biosynthesis of unsaturated fatty acids	K17360	GO:0044464//cell part;GO:0005739//mitochondrion;GO:0005737//cytoplasm;GO:0043226//organelle;GO:0043227//membrane-bounded organelle;GO:0043229//intracellular organelle;GO:0005623//cell;GO:0043231//intracellular membrane-bounded organelle;GO:0005575//cellular_component;GO:0005622//intracellular;GO:0044444//cytoplasmic part;GO:0044424//intracellular part;GO:0005829//cytosol	GO:0005488//binding;GO:0003674//molecular_function;GO:0043167//ion binding	GO:0044710//single-organism metabolic process;GO:0008150//biological_process;GO:0006629//lipid metabolic process;GO:0008152//metabolic process;GO:0044281//small molecule metabolic process;GO:0071704//organic substance metabolic process;GO:0009056//catabolic process;GO:0044238//primary metabolic process;GO:0044699//single-organism process
ENSG00000099203	1960.47	712.403	81.03	39.9767	-1.40244	0.00347634	0.0331738	down	TMED1	-	-	-	-	-	GO:0016020//membrane;GO:0005737//cytoplasm;GO:0043226//organelle;GO:0043231//intracellular membrane-bounded organelle;GO:0005622//intracellular;GO:0071944//cell periphery;GO:0005886//plasma membrane;GO:0005623//cell;GO:0043227//membrane-bounded organelle;GO:0005575//cellular_component;GO:0005783//endoplasmic reticulum;GO:0044424//intracellular part;GO:0043229//intracellular organelle;GO:0012505//…	GO:0003674//molecular_function	GO:0065007//biological regulation;GO:0007165//signal transduction;GO:0050896//response to stimulus;GO:0006810//transport;GO:0050789//regulation of biological process;GO:0051234//establishment of localization;GO:0044699//single-organism process;GO:0051716//cellular response to stimulus;GO:0007154//cell communication;GO:0051179//localization;GO:0044763//single-organism cellular process;GO:0008150//…
ENSG00000099385	2667	494.333	73.05	19.64	-2.3465	0.000119245	0.00513689	down	BCL7C	-	-	-	-	-	-	-	GO:0009987//cellular process;GO:0008219//cell death;GO:0044763//single-organism cellular process;GO:0044699//single-organism process;GO:0008150//biological_process
ENSG00000099624	7607.67	1187.67	651.77	158.233	-2.6008	0.000102243	0.00484264	down	ATP5D	ATP synthase, H+ transporting, mitochondrial F1 complex, delta subunit [Source:HGNC Symbol;Acc:837]	Metabolism;Human Diseases	Energy metabolism;Neurodegenerative diseases	ko05016//Huntington's disease;ko05010//Alzheimer's disease;ko00190//Oxidative phosphorylation;ko05012//Parkinson's disease	K02134	GO:0005739//mitochondrion;GO:0043226//organelle;GO:0044444//cytoplasmic part;GO:0043234//protein complex;GO:0043229//intracellular organelle;GO:0043231//intracellular membrane-bounded organelle;GO:0044424//intracellular part;GO:0032991//macromolecular complex;GO:0044464//cell part;GO:0005737//cytoplasm;GO:0043227//membrane-bounded organelle;GO:0005623//cell;GO:0005575//cellular_component;GO:00056…	GO:0005215//transporter activity;GO:0005488//binding;GO:0016787//hydrolase activity;GO:0003674//molecular_function;GO:0003824//catalytic activity;GO:0016817//hydrolase activity, acting on acid anhydrides;GO:0016887//ATPase activity;GO:0017111//nucleoside-triphosphatase activity;GO:0016462//pyrophosphatase activity;GO:0043167//ion binding;GO:0016818//hydrolase activity, acting on acid anhydrides, …	GO:0071704//organic substance metabolic process;GO:0008152//metabolic process;GO:0044699//single-organism process;GO:0009987//cellular process;GO:0055085//transmembrane transport;GO:1901360//organic cyclic compound metabolic process;GO:0044248//cellular catabolic process;GO:0044710//single-organism metabolic process;GO:0051234//establishment of localization;GO:0009056//catabolic process;GO:001943…
ENSG00000099795	4140	602	828.687	198.07	-2.7049	8.98937e-05	0.00450539	down	NDUFB7	-	Metabolism;Human Diseases	Endocrine and metabolic diseases;Energy metabolism;Neurodegenerative diseases	ko05016//Huntington's disease;ko05010//Alzheimer's disease;ko04932//Non-alcoholic fatty liver disease (NAFLD);ko00190//Oxidative phosphorylation;ko05012//Parkinson's disease	K03963	GO:0032991//macromolecular complex;GO:0043231//intracellular membrane-bounded organelle;GO:0005622//intracellular;GO:0043227//membrane-bounded organelle;GO:0043226//organelle;GO:0043234//protein complex;GO:0005737//cytoplasm;GO:0005575//cellular_component;GO:0005739//mitochondrion;GO:0044424//intracellular part;GO:0043229//intracellular organelle;GO:0005623//cell;GO:0044464//cell part;GO:0044444/…	GO:0003824//catalytic activity;GO:0003674//molecular_function;GO:0016491//oxidoreductase activity	GO:0044699//single-organism process;GO:0006091//generation of precursor metabolites and energy;GO:0044237//cellular metabolic process;GO:0008150//biological_process;GO:0009987//cellular process;GO:0044281//small molecule metabolic process;GO:0044710//single-organism metabolic process;GO:0008152//metabolic process
ENSG00000099797	5656	1658.33	333.04	114.457	-1.71026	0.000581933	0.0120883	down	TECR	-	Metabolism	Global and Overview;Lipid metabolism	ko01212//Fatty acid metabolism;ko00062//Fatty acid elongation;ko01040//Biosynthesis of unsaturated fatty acids	K10258	GO:0005623//cell;GO:0005622//intracellular;GO:0012505//endomembrane system;GO:0043227//membrane-bounded organelle;GO:0043226//organelle;GO:0044444//cytoplasmic part;GO:0043231//intracellular membrane-bounded organelle;GO:0005737//cytoplasm;GO:0005575//cellular_component;GO:0044424//intracellular part;GO:0005783//endoplasmic reticulum;GO:0043229//intracellular organelle;GO:0044464//cell part	GO:0003824//catalytic activity;GO:0003674//molecular_function;GO:0016491//oxidoreductase activity	GO:0008152//metabolic process;GO:0044237//cellular metabolic process;GO:0044281//small molecule metabolic process;GO:0006629//lipid metabolic process;GO:0044699//single-organism process;GO:0051186//cofactor metabolic process;GO:0009058//biosynthetic process;GO:0044238//primary metabolic process;GO:0009987//cellular process;GO:0071704//organic substance metabolic process;GO:0044710//single-organis…
ENSG00000099800	4893.63	792.653	233.17	42.1967	-2.5573	6.06927e-05	0.00374579	down	TIMM13	translocase of inner mitochondrial membrane 13 homolog (yeast) [Source:HGNC Symbol;Acc:11816]	-	-	-	-	GO:0005623//cell;GO:0005622//intracellular;GO:0043229//intracellular organelle;GO:0044424//intracellular part;GO:0043226//organelle;GO:0043231//intracellular membrane-bounded organelle;GO:0005739//mitochondrion;GO:0005575//cellular_component;GO:0043227//membrane-bounded organelle;GO:0032991//macromolecular complex;GO:0043234//protein complex;GO:0005737//cytoplasm;GO:0044464//cell part;GO:0044444/…	GO:0043167//ion binding;GO:0003674//molecular_function;GO:0005488//binding	GO:0034613//cellular protein localization;GO:0006605//protein targeting;GO:0070727//cellular macromolecule localization;GO:0003008//system process;GO:0071702//organic substance transport;GO:0006996//organelle organization;GO:0016043//cellular component organization;GO:0051641//cellular localization;GO:0045184//establishment of protein localization;GO:0051179//localization;GO:0008104//protein loca…
ENSG00000099804	5006	1231	210.5	70.05	-1.95604	0.000526486	0.0113672	down	CDC34	-	Genetic Information Processing;Human Diseases	Infectious diseases;Folding, sorting and degradation	ko05168//Herpes simplex infection;ko04120//Ubiquitin mediated proteolysis	K02207	GO:0043229//intracellular organelle;GO:0043231//intracellular membrane-bounded organelle;GO:0043226//organelle;GO:0005634//nucleus;GO:0043227//membrane-bounded organelle;GO:0044424//intracellular part;GO:0005623//cell;GO:0005737//cytoplasm;GO:0005622//intracellular;GO:0005575//cellular_component;GO:0044464//cell part	GO:0016874//ligase activity;GO:0005488//binding;GO:0043167//ion binding;GO:0003824//catalytic activity;GO:0003674//molecular_function	GO:0044260//cellular macromolecule metabolic process;GO:0046483//heterocycle metabolic process;GO:0006725//cellular aromatic compound metabolic process;GO:0044699//single-organism process;GO:0034641//cellular nitrogen compound metabolic process;GO:0044763//single-organism cellular process;GO:0006464//cellular protein modification process;GO:0044267//cellular protein metabolic process;GO:0090304//…
ENSG00000099817	11671.3	3294.33	450.387	175.957	-1.76472	0.000784952	0.0141455	down	POLR2E	polymerase (RNA) II (DNA directed) polypeptide E, 25kDa [Source:HGNC Symbol;Acc:9192]	Genetic Information Processing;Organismal Systems;Metabolism;Human Diseases	Immune system;Nucleotide metabolism;Infectious diseases;Transcription;Neurodegenerative diseases	ko05169//Epstein-Barr virus infection;ko05016//Huntington's disease;ko00230//Purine metabolism;ko00240//Pyrimidine metabolism;ko04623//Cytosolic DNA-sensing pathway;ko03020//RNA polymerase	K03013	GO:0044464//cell part;GO:0031981//nuclear lumen;GO:0005737//cytoplasm;GO:0043233//organelle lumen;GO:0005622//intracellular;GO:0070013//intracellular organelle lumen;GO:0005634//nucleus;GO:0043232//intracellular non-membrane-bounded organelle;GO:0005829//cytosol;GO:0044422//organelle part;GO:0043234//protein complex;GO:0005654//nucleoplasm;GO:0044444//cytoplasmic part;GO:0043227//membrane-bounded…	GO:0003674//molecular_function;GO:0016740//transferase activity;GO:0003676//nucleic acid binding;GO:0005488//binding;GO:1901363//heterocyclic compound binding;GO:0016779//nucleotidyltransferase activity;GO:0003824//catalytic activity;GO:0097159//organic cyclic compound binding;GO:0003677//DNA binding;GO:0016772//transferase activity, transferring phosphorus-containing groups	GO:0050896//response to stimulus;GO:0006807//nitrogen compound metabolic process;GO:0044238//primary metabolic process;GO:0051704//multi-organism process;GO:0006259//DNA metabolic process;GO:0044237//cellular metabolic process;GO:0043170//macromolecule metabolic process;GO:0071704//organic substance metabolic process;GO:0008150//biological_process;GO:0006396//RNA processing;GO:0010467//gene expre…
ENSG00000099860	6261.67	1564.33	270.23	88.5067	-1.95548	6.76401e-06	0.000849869	down	GADD45B	growth arrest and DNA-damage-inducible, beta [Source:HGNC Symbol;Acc:4096]	Cellular Processes;Environmental Information Processing	Cell growth and death;Signal transduction	ko04010//MAPK signaling pathway;ko04068//FoxO signaling pathway;ko04064//NF-kappa B signaling pathway;ko04110//Cell cycle;ko04115//p53 signaling pathway	K04402	GO:0005634//nucleus;GO:0005623//cell;GO:0005575//cellular_component;GO:0043227//membrane-bounded organelle;GO:0044424//intracellular part;GO:0043229//intracellular organelle;GO:0043226//organelle;GO:0005737//cytoplasm;GO:0044464//cell part;GO:0043231//intracellular membrane-bounded organelle;GO:0005622//intracellular	GO:0003674//molecular_function	GO:0008219//cell death;GO:0044699//single-organism process;GO:0048869//cellular developmental process;GO:0006950//response to stress;GO:0009987//cellular process;GO:0008150//biological_process;GO:0030154//cell differentiation;GO:0050896//response to stimulus;GO:0044763//single-organism cellular process;GO:0032502//developmental process;GO:0044767//single-organism developmental process
ENSG00000099899	1142.18	498.13	38.7567	18.2833	-1.15192	0.00503811	0.041604	down	TRMT2A	tRNA methyltransferase 2 homolog A (S. cerevisiae) [Source:HGNC Symbol;Acc:24974]	-	-	-	-	-	GO:0003824//catalytic activity;GO:1901363//heterocyclic compound binding;GO:0003723//RNA binding;GO:0097159//organic cyclic compound binding;GO:0008168//methyltransferase activity;GO:0016741//transferase activity, transferring one-carbon groups;GO:0003676//nucleic acid binding;GO:0016740//transferase activity;GO:0003674//molecular_function;GO:0005488//binding	GO:0043170//macromolecule metabolic process;GO:0006139//nucleobase-containing compound metabolic process;GO:0043412//macromolecule modification;GO:0090304//nucleic acid metabolic process;GO:1901360//organic cyclic compound metabolic process;GO:0022613//ribonucleoprotein complex biogenesis;GO:0044267//cellular protein metabolic process;GO:0044238//primary metabolic process;GO:0034660//ncRNA metabo…
ENSG00000099901	13255.5	4500.87	972.39	456.573	-1.51093	0.0010127	0.0165518	down	RANBP1	-	Human Diseases	Infectious diseases;Cancers	ko05203//Viral carcinogenesis;ko05166//HTLV-I infection	K15306	GO:0043228//non-membrane-bounded organelle;GO:0043227//membrane-bounded organelle;GO:0005622//intracellular;GO:0043231//intracellular membrane-bounded organelle;GO:0044464//cell part;GO:0031975//envelope;GO:0015630//microtubule cytoskeleton;GO:0005737//cytoplasm;GO:0005635//nuclear envelope;GO:0012505//endomembrane system;GO:0044428//nuclear part;GO:0005634//nucleus;GO:0044446//intracellular orga…	GO:0003674//molecular_function;GO:0005515//protein binding;GO:0019899//enzyme binding;GO:0005488//binding;GO:0098772//molecular function regulator;GO:0030234//enzyme regulator activity	GO:0006996//organelle organization;GO:0051234//establishment of localization;GO:0051179//localization;GO:0050789//regulation of biological process;GO:0009987//cellular process;GO:0023052//signaling;GO:0007154//cell communication;GO:0044419//interspecies interaction between organisms;GO:0071840//cellular component organization or biogenesis;GO:0007165//signal transduction;GO:0050794//regulation of…
ENSG00000099977	3571.53	1158.97	420.517	195.74	-1.5619	0.00445158	0.0384986	down	DDT	-	-	-	-	-	GO:0044424//intracellular part;GO:0044464//cell part;GO:0005623//cell;GO:0005737//cytoplasm;GO:0005575//cellular_component;GO:0005622//intracellular	GO:0016829//lyase activity;GO:0003674//molecular_function;GO:0016853//isomerase activity;GO:0003824//catalytic activity	GO:0044710//single-organism metabolic process;GO:0019748//secondary metabolic process;GO:0008152//metabolic process;GO:0009058//biosynthetic process;GO:0008150//biological_process;GO:0044699//single-organism process
ENSG00000100028	4591.38	1529.77	284.047	137.17	-1.53369	0.000935767	0.0156767	down	SNRPD3	small nuclear ribonucleoprotein D3 polypeptide 18kDa [Source:HGNC Symbol;Acc:11160]	Genetic Information Processing;Human Diseases	Immune diseases;Transcription	ko05322//Systemic lupus erythematosus;ko03040//Spliceosome	K11088	GO:0044446//intracellular organelle part;GO:0043227//membrane-bounded organelle;GO:0044422//organelle part;GO:0044464//cell part;GO:0043231//intracellular membrane-bounded organelle;GO:0044424//intracellular part;GO:0031974//membrane-enclosed lumen;GO:0005829//cytosol;GO:0005634//nucleus;GO:0005654//nucleoplasm;GO:0070013//intracellular organelle lumen;GO:0044428//nuclear part;GO:0005622//intrace…	GO:0097159//organic cyclic compound binding;GO:0003674//molecular_function;GO:0005488//binding;GO:0019899//enzyme binding;GO:0003723//RNA binding;GO:0003676//nucleic acid binding;GO:0005515//protein binding;GO:1901363//heterocyclic compound binding	GO:0009987//cellular process;GO:1901360//organic cyclic compound metabolic process;GO:0065003//macromolecular complex assembly;GO:0016043//cellular component organization;GO:0071840//cellular component organization or biogenesis;GO:0090304//nucleic acid metabolic process;GO:0022618//ribonucleoprotein complex assembly;GO:0043933//macromolecular complex subunit organization;GO:0071826//ribonucleopr…
ENSG00000100075	5552.33	2083	173.95	89.9633	-1.35307	0.0054782	0.0436012	down	SLC25A1	solute carrier family 25 (mitochondrial carrier; citrate transporter), member 1 [Source:HGNC Symbol;Acc:10979]	-	-	-	-	GO:0005575//cellular_component;GO:0044444//cytoplasmic part;GO:0044424//intracellular part;GO:0043229//intracellular organelle;GO:0044464//cell part;GO:0005623//cell;GO:0043226//organelle;GO:0005739//mitochondrion;GO:0043231//intracellular membrane-bounded organelle;GO:0005737//cytoplasm;GO:0043227//membrane-bounded organelle;GO:0005622//intracellular	GO:0005215//transporter activity;GO:0022857//transmembrane transporter activity;GO:0003674//molecular_function	GO:0005975//carbohydrate metabolic process;GO:0009987//cellular process;GO:0044710//single-organism metabolic process;GO:0071704//organic substance metabolic process;GO:0009058//biosynthetic process;GO:0006629//lipid metabolic process;GO:0044699//single-organism process;GO:0008152//metabolic process;GO:0008150//biological_process;GO:0051179//localization;GO:0044237//cellular metabolic process;GO:…
ENSG00000100097	29658.7	8214.67	5472.75	2310.41	-1.78993	0.00158275	0.0212281	down	LGALS1	-	-	-	-	-	GO:0043227//membrane-bounded organelle;GO:0005615//extracellular space;GO:0043231//intracellular membrane-bounded organelle;GO:0044421//extracellular region part;GO:0044424//intracellular part;GO:0043229//intracellular organelle;GO:0005576//extracellular region;GO:0005737//cytoplasm;GO:0005634//nucleus;GO:0005578//proteinaceous extracellular matrix;GO:0043226//organelle;GO:0044464//cell part;GO:0…	GO:0004871//signal transducer activity;GO:0003674//molecular_function	GO:0008150//biological_process;GO:0050896//response to stimulus;GO:0050789//regulation of biological process;GO:0002376//immune system process;GO:0048856//anatomical structure development;GO:0007165//signal transduction;GO:0009987//cellular process;GO:0007154//cell communication;GO:0051716//cellular response to stimulus;GO:0044763//single-organism cellular process;GO:0050794//regulation of cellul…
ENSG00000100100	14	40.6667	0.32	0.993333	1.54982	0.00205034	0.0248421	up	PIK3IP1	phosphoinositide-3-kinase interacting protein 1 [Source:HGNC Symbol;Acc:24942]	-	-	-	-	GO:0005623//cell;GO:0005575//cellular_component;GO:0005886//plasma membrane;GO:0071944//cell periphery;GO:0016020//membrane;GO:0044464//cell part	GO:0005515//protein binding;GO:0005488//binding;GO:0019899//enzyme binding;GO:0003674//molecular_function	GO:0008150//biological_process
ENSG00000100101	1037.38	305.647	65.06	24.0633	-1.71072	0.000628742	0.0126258	down	NOL12	-	-	-	-	-	GO:0043227//membrane-bounded organelle;GO:0031974//membrane-enclosed lumen;GO:0044424//intracellular part;GO:0005575//cellular_component;GO:0043231//intracellular membrane-bounded organelle;GO:0005622//intracellular;GO:0044428//nuclear part;GO:0031981//nuclear lumen;GO:0005634//nucleus;GO:0005623//cell;GO:0043233//organelle lumen;GO:0044464//cell part;GO:0043232//intracellular non-membrane-bounde…	GO:1901363//heterocyclic compound binding;GO:0005488//binding;GO:0003723//RNA binding;GO:0003676//nucleic acid binding;GO:0003674//molecular_function;GO:0097159//organic cyclic compound binding;GO:0019843//rRNA binding	-
ENSG00000100116	779	281	30.31	18.89	-1.40955	0.00330276	0.0323535	down	GCAT	-	Metabolism	Amino acid metabolism	ko00260//Glycine, serine and threonine metabolism	K00639	GO:0005575//cellular_component;GO:0005737//cytoplasm;GO:0043231//intracellular membrane-bounded organelle;GO:0005739//mitochondrion;GO:0044444//cytoplasmic part;GO:0043226//organelle;GO:0044424//intracellular part;GO:0005634//nucleus;GO:0005622//intracellular;GO:0043229//intracellular organelle;GO:0044464//cell part;GO:0005623//cell;GO:0043227//membrane-bounded organelle	GO:0016740//transferase activity;GO:0016746//transferase activity, transferring acyl groups;GO:0003674//molecular_function;GO:0003824//catalytic activity;GO:0043167//ion binding;GO:0005488//binding	GO:0071704//organic substance metabolic process;GO:0044763//single-organism cellular process;GO:0009056//catabolic process;GO:0044237//cellular metabolic process;GO:0006082//organic acid metabolic process;GO:0044238//primary metabolic process;GO:0008150//biological_process;GO:0009058//biosynthetic process;GO:0044710//single-organism metabolic process;GO:0009987//cellular process;GO:0006807//nitro…
ENSG00000100124	1603.69	745.383	40.98	33.0067	-1.07275	0.00462379	0.0394987	down	ANKRD54	ankyrin repeat domain 54 [Source:HGNC Symbol;Acc:25185]	-	-	-	-	GO:0043226//organelle;GO:0005634//nucleus;GO:0043231//intracellular membrane-bounded organelle;GO:0043229//intracellular organelle;GO:0044424//intracellular part;GO:0005737//cytoplasm;GO:0044464//cell part;GO:0005575//cellular_component;GO:0005622//intracellular;GO:0043227//membrane-bounded organelle;GO:0005623//cell	GO:0003674//molecular_function;GO:0098772//molecular function regulator;GO:0030234//enzyme regulator activity	GO:0007049//cell cycle;GO:0051641//cellular localization;GO:0044699//single-organism process;GO:0044763//single-organism cellular process;GO:0006810//transport;GO:0008150//biological_process;GO:0051179//localization;GO:0051649//establishment of localization in cell;GO:0009987//cellular process;GO:0051234//establishment of localization;GO:0051169//nuclear transport;GO:0006913//nucleocytoplasmic tr…
ENSG00000100138	5469	2314.33	195.95	105.803	-1.20208	0.00384866	0.0351508	down	NHP2L1	NHP2 non-histone chromosome protein 2-like 1 (S. cerevisiae) [Source:HGNC Symbol;Acc:7819]	Genetic Information Processing	Translation;Transcription	ko03040//Spliceosome;ko03008//Ribosome biogenesis in eukaryotes	K12845	GO:0043227//membrane-bounded organelle;GO:0044464//cell part;GO:0043228//non-membrane-bounded organelle;GO:0044422//organelle part;GO:0005623//cell;GO:0044446//intracellular organelle part;GO:0070013//intracellular organelle lumen;GO:0031974//membrane-enclosed lumen;GO:0005634//nucleus;GO:0043233//organelle lumen;GO:0031981//nuclear lumen;GO:0005654//nucleoplasm;GO:0043229//intracellular organell…	GO:0003674//molecular_function;GO:0003723//RNA binding;GO:0003676//nucleic acid binding;GO:1901363//heterocyclic compound binding;GO:0097159//organic cyclic compound binding;GO:0005488//binding	GO:0046483//heterocycle metabolic process;GO:0006396//RNA processing;GO:0044260//cellular macromolecule metabolic process;GO:0043170//macromolecule metabolic process;GO:0090304//nucleic acid metabolic process;GO:0022613//ribonucleoprotein complex biogenesis;GO:0016071//mRNA metabolic process;GO:0008150//biological_process;GO:0006397//mRNA processing;GO:0010467//gene expression;GO:0042254//ribosom…
ENSG00000100142	2062.67	449.333	187.71	55.9367	-2.13577	8.13716e-05	0.00426498	down	POLR2F	-	Genetic Information Processing;Organismal Systems;Metabolism;Human Diseases	Immune system;Nucleotide metabolism;Infectious diseases;Transcription;Neurodegenerative diseases	ko05169//Epstein-Barr virus infection;ko05016//Huntington's disease;ko00230//Purine metabolism;ko00240//Pyrimidine metabolism;ko04623//Cytosolic DNA-sensing pathway;ko03020//RNA polymerase	K03014	GO:0043227//membrane-bounded organelle;GO:0070013//intracellular organelle lumen;GO:0005622//intracellular;GO:0044422//organelle part;GO:0005575//cellular_component;GO:0043233//organelle lumen;GO:0044444//cytoplasmic part;GO:0032991//macromolecular complex;GO:0043234//protein complex;GO:0005623//cell;GO:0044424//intracellular part;GO:0043229//intracellular organelle;GO:0005654//nucleoplasm;GO:004…	GO:0003677//DNA binding;GO:0097159//organic cyclic compound binding;GO:0016740//transferase activity;GO:0003824//catalytic activity;GO:0005488//binding;GO:0016779//nucleotidyltransferase activity;GO:0016772//transferase activity, transferring phosphorus-containing groups;GO:1901363//heterocyclic compound binding;GO:0003676//nucleic acid binding;GO:0003674//molecular_function	GO:0046483//heterocycle metabolic process;GO:0044260//cellular macromolecule metabolic process;GO:0006725//cellular aromatic compound metabolic process;GO:0044237//cellular metabolic process;GO:0006807//nitrogen compound metabolic process;GO:0006950//response to stress;GO:0051704//multi-organism process;GO:0090304//nucleic acid metabolic process;GO:0043170//macromolecule metabolic process;GO:0071…
ENSG00000100147	292	120.333	13.31	7.37	-1.22322	0.00486798	0.0408139	down	CCDC134	-	-	-	-	-	GO:0005576//extracellular region;GO:0005575//cellular_component	-	-
ENSG00000100162	3260	729	211.237	66.9733	-2.09844	0.000175207	0.00653614	down	CENPM	-	-	-	-	-	GO:0043231//intracellular membrane-bounded organelle;GO:0005623//cell;GO:0005575//cellular_component;GO:0005634//nucleus;GO:0043234//protein complex;GO:0043228//non-membrane-bounded organelle;GO:0005737//cytoplasm;GO:0043232//intracellular non-membrane-bounded organelle;GO:0005694//chromosome;GO:0005829//cytosol;GO:0043226//organelle;GO:0043229//intracellular organelle;GO:0005622//intracellular;G…	-	GO:0044763//single-organism cellular process;GO:0044699//single-organism process;GO:0007049//cell cycle;GO:0008150//biological_process;GO:0009987//cellular process
ENSG00000100209	569.637	238.58	38.5567	22.48	-1.21203	0.00477998	0.0403001	down	HSCB	HscB mitochondrial iron-sulfur cluster co-chaperone [Source:HGNC Symbol;Acc:28913]	-	-	-	-	GO:0044464//cell part;GO:0005623//cell;GO:0043226//organelle;GO:0043227//membrane-bounded organelle;GO:0005575//cellular_component;GO:0044444//cytoplasmic part;GO:0005737//cytoplasm;GO:0043231//intracellular membrane-bounded organelle;GO:0005739//mitochondrion;GO:0044424//intracellular part;GO:0005622//intracellular;GO:0043229//intracellular organelle	GO:0043167//ion binding;GO:0005488//binding;GO:0003674//molecular_function	GO:0008152//metabolic process;GO:0043933//macromolecular complex subunit organization;GO:0071840//cellular component organization or biogenesis;GO:0065003//macromolecular complex assembly;GO:0070271//protein complex biogenesis;GO:0044085//cellular component biogenesis;GO:0016043//cellular component organization;GO:0006457//protein folding;GO:0009987//cellular process;GO:0071822//protein complex s…
ENSG00000100263	1157.33	401.333	46.2633	25.93	-1.46651	0.00256353	0.02823	down	RHBDD3	-	-	-	-	-	GO:0005575//cellular_component	GO:0003674//molecular_function;GO:0016787//hydrolase activity;GO:0008233//peptidase activity;GO:0003824//catalytic activity	-
ENSG00000100292	2794.67	1068.67	83.94	48.16	-1.35699	0.000678841	0.0131643	down	HMOX1	heme oxygenase (decycling) 1 [Source:HGNC Symbol;Acc:5013]	Organismal Systems;Environmental Information Processing;Metabolism;Human Diseases	Metabolism of cofactors and vitamins;Signal transduction;Digestive system;Cancers	ko05206//MicroRNAs in cancer;ko04066//HIF-1 signaling pathway;ko04978//Mineral absorption;ko00860//Porphyrin and chlorophyll metabolism	K00510	GO:0005634//nucleus;GO:0043232//intracellular non-membrane-bounded organelle;GO:0043226//organelle;GO:0044421//extracellular region part;GO:0005615//extracellular space;GO:0005886//plasma membrane;GO:0005576//extracellular region;GO:0070013//intracellular organelle lumen;GO:0044446//intracellular organelle part;GO:0071944//cell periphery;GO:0016020//membrane;GO:0043231//intracellular membrane-bou…	GO:0003824//catalytic activity;GO:0016491//oxidoreductase activity;GO:0043167//ion binding;GO:0019899//enzyme binding;GO:0004871//signal transducer activity;GO:0005515//protein binding;GO:0005488//binding;GO:0003674//molecular_function	GO:0009987//cellular process;GO:0051234//establishment of localization;GO:0023052//signaling;GO:0044085//cellular component biogenesis;GO:0009653//anatomical structure morphogenesis;GO:0051716//cellular response to stimulus;GO:0051179//localization;GO:0008283//cell proliferation;GO:0048646//anatomical structure formation involved in morphogenesis;GO:0070271//protein complex biogenesis;GO:0006810/…
ENSG00000100294	1092	415	36.8967	16.8633	-1.33957	0.00241873	0.0272652	down	MCAT	malonyl CoA:ACP acyltransferase (mitochondrial) [Source:HGNC Symbol;Acc:29622]	Metabolism	Global and Overview;Lipid metabolism	ko01212//Fatty acid metabolism;ko00061//Fatty acid biosynthesis	K00645	GO:0044424//intracellular part;GO:0044464//cell part;GO:0005575//cellular_component;GO:0005622//intracellular;GO:0005623//cell;GO:0043229//intracellular organelle;GO:0005739//mitochondrion;GO:0043226//organelle;GO:0043231//intracellular membrane-bounded organelle;GO:0044444//cytoplasmic part;GO:0005737//cytoplasm;GO:0043227//membrane-bounded organelle	GO:0003674//molecular_function;GO:0016740//transferase activity;GO:0016746//transferase activity, transferring acyl groups;GO:0003824//catalytic activity	GO:0044238//primary metabolic process;GO:0044699//single-organism process;GO:0006629//lipid metabolic process;GO:0008152//metabolic process;GO:0044281//small molecule metabolic process;GO:0071704//organic substance metabolic process;GO:0008150//biological_process;GO:0009058//biosynthetic process;GO:0044710//single-organism metabolic process
ENSG00000100300	10687.7	2243	803.083	240.53	-2.18478	0.000248843	0.00784883	down	TSPO	translocator protein (18kDa) [Source:HGNC Symbol;Acc:1158]	Environmental Information Processing;Human Diseases	Infectious diseases;Signaling molecules and interaction	ko05166//HTLV-I infection;ko04080//Neuroactive ligand-receptor interaction	K05770	GO:0043229//intracellular organelle;GO:0044464//cell part;GO:0005737//cytoplasm;GO:0043226//organelle;GO:0043227//membrane-bounded organelle;GO:0005623//cell;GO:0005575//cellular_component;GO:0044444//cytoplasmic part;GO:0005622//intracellular;GO:0043231//intracellular membrane-bounded organelle;GO:0005739//mitochondrion;GO:0044424//intracellular part	GO:0008289//lipid binding;GO:0003674//molecular_function;GO:0004871//signal transducer activity;GO:0005488//binding	GO:0070727//cellular macromolecule localization;GO:0044710//single-organism metabolic process;GO:0051674//localization of cell;GO:0008150//biological_process;GO:0044237//cellular metabolic process;GO:0008219//cell death;GO:0046907//intracellular transport;GO:0071840//cellular component organization or biogenesis;GO:0044238//primary metabolic process;GO:0009987//cellular process;GO:0006605//protei…
ENSG00000100311	335	719	5.18	15.8233	1.12351	0.0017642	0.0226541	up	PDGFB	platelet-derived growth factor beta polypeptide [Source:HGNC Symbol;Acc:8800]	Cellular Processes;Environmental Information Processing;Human Diseases	Cellular commiunity;Cell motility;Signal transduction;Infectious diseases;Cancers;Signaling molecules and interaction	ko05200//Pathways in cancer;ko05166//HTLV-I infection;ko04151//PI3K-Akt signaling pathway;ko04060//Cytokine-cytokine receptor interaction;ko04010//MAPK signaling pathway;ko04014//Ras signaling pathway;ko04510//Focal adhesion;ko04810//Regulation of actin cytoskeleton;ko04015//Rap1 signaling pathway;ko05206//MicroRNAs in cancer;ko05231//Choline metabolism in cancer;ko04540//Gap junction;ko05215//Pr…	K17386	GO:0005622//intracellular;GO:0097708//intracellular vesicle;GO:0031982//vesicle;GO:0031988//membrane-bounded vesicle;GO:0044421//extracellular region part;GO:0005623//cell;GO:0044424//intracellular part;GO:0016023//cytoplasmic, membrane-bounded vesicle;GO:0005783//endoplasmic reticulum;GO:0071944//cell periphery;GO:0005886//plasma membrane;GO:0043227//membrane-bounded organelle;GO:0031410//cytopl…	GO:0030234//enzyme regulator activity;GO:0098772//molecular function regulator;GO:0003674//molecular_function	GO:0007275//multicellular organism development;GO:0051674//localization of cell;GO:0008152//metabolic process;GO:0043170//macromolecule metabolic process;GO:0007010//cytoskeleton organization;GO:0044700//single organism signaling;GO:0044260//cellular macromolecule metabolic process;GO:0040011//locomotion;GO:0044763//single-organism cellular process;GO:0050896//response to stimulus;GO:0006807//nit…
ENSG00000100314	10.91	2.02333	0.156667	0.0366667	-2.34589	0.00355466	0.0334622	down	CABP7	calcium binding protein 7 [Source:HGNC Symbol;Acc:20834]	-	-	-	-	GO:0005886//plasma membrane;GO:0044424//intracellular part;GO:0043226//organelle;GO:0005794//Golgi apparatus;GO:0005623//cell;GO:0012505//endomembrane system;GO:0043227//membrane-bounded organelle;GO:0005737//cytoplasm;GO:0043231//intracellular membrane-bounded organelle;GO:0005575//cellular_component;GO:0043229//intracellular organelle;GO:0016020//membrane;GO:0044464//cell part;GO:0044444//cytop…	GO:0043167//ion binding;GO:0003674//molecular_function;GO:0005488//binding	-
ENSG00000100319	836.423	233.31	55.9	21.7367	-1.77961	0.000999326	0.0164565	down	ZMAT5	zinc finger, matrin-type 5 [Source:HGNC Symbol;Acc:28046]	-	-	-	-	GO:0043227//membrane-bounded organelle;GO:0005575//cellular_component;GO:0005623//cell;GO:0044464//cell part;GO:0044424//intracellular part;GO:0043231//intracellular membrane-bounded organelle;GO:0043226//organelle;GO:0005622//intracellular;GO:0005737//cytoplasm;GO:0005634//nucleus;GO:0043229//intracellular organelle	GO:0043167//ion binding;GO:0003674//molecular_function;GO:0005488//binding	GO:0044260//cellular macromolecule metabolic process;GO:0044238//primary metabolic process;GO:0090304//nucleic acid metabolic process;GO:0016071//mRNA metabolic process;GO:0071704//organic substance metabolic process;GO:0034641//cellular nitrogen compound metabolic process;GO:0006807//nitrogen compound metabolic process;GO:0006396//RNA processing;GO:0008150//biological_process;GO:0006725//cellula…
ENSG00000100342	1310.34	2861.4	29.6933	117.877	1.16668	0.00202504	0.0246396	up	APOL1	-	Human Diseases	Infectious diseases	ko05143//African trypanosomiasis	K14480	GO:0044421//extracellular region part;GO:0005615//extracellular space;GO:0005576//extracellular region;GO:0005575//cellular_component	GO:0005215//transporter activity;GO:0022857//transmembrane transporter activity;GO:0005488//binding;GO:0008289//lipid binding;GO:0003674//molecular_function	GO:0006950//response to stress;GO:0006629//lipid metabolic process;GO:0050896//response to stimulus;GO:0051234//establishment of localization;GO:0051179//localization;GO:0006810//transport;GO:0044699//single-organism process;GO:0008152//metabolic process;GO:0071704//organic substance metabolic process;GO:0044710//single-organism metabolic process;GO:0008150//biological_process;GO:0044238//primary…
ENSG00000100348	2088	676.667	80.16	32.41	-1.56621	0.00159833	0.0213231	down	TXN2	thioredoxin 2 [Source:HGNC Symbol;Acc:17772]	-	-	-	-	GO:0043232//intracellular non-membrane-bounded organelle;GO:0044444//cytoplasmic part;GO:0044422//organelle part;GO:0005622//intracellular;GO:0044428//nuclear part;GO:0005575//cellular_component;GO:0005737//cytoplasm;GO:0031981//nuclear lumen;GO:0043229//intracellular organelle;GO:0005634//nucleus;GO:0044446//intracellular organelle part;GO:0043227//membrane-bounded organelle;GO:0005730//nucleolu…	GO:0003824//catalytic activity;GO:0003674//molecular_function;GO:0016491//oxidoreductase activity	GO:0008152//metabolic process;GO:0042592//homeostatic process;GO:0065008//regulation of biological quality;GO:0006950//response to stress;GO:0065007//biological regulation;GO:0044710//single-organism metabolic process;GO:0050896//response to stimulus;GO:0008150//biological_process;GO:0044699//single-organism process;GO:0044281//small molecule metabolic process
ENSG00000100379	1140.67	405	38.6	21.98	-1.4371	0.00268976	0.0287963	down	KCTD17	potassium channel tetramerization domain containing 17 [Source:HGNC Symbol;Acc:25705]	-	-	-	-	-	GO:0003674//molecular_function	GO:0070271//protein complex biogenesis;GO:0016043//cellular component organization;GO:0008150//biological_process;GO:0043933//macromolecular complex subunit organization;GO:0009987//cellular process;GO:0071822//protein complex subunit organization;GO:0006461//protein complex assembly;GO:0022607//cellular component assembly;GO:0071840//cellular component organization or biogenesis;GO:0065003//macr…
ENSG00000100387	2524.67	736.667	122.137	47.5133	-1.73472	0.000676097	0.0131392	down	RBX1	ring-box 1, E3 ubiquitin protein ligase [Source:HGNC Symbol;Acc:9928]	Genetic Information Processing;Organismal Systems;Cellular Processes;Environmental Information Processing;Human Diseases	Replication and repair;Cell growth and death;Signal transduction;Environmental adaptation;Folding, sorting and degradation;Cancers	ko05200//Pathways in cancer;ko04141//Protein processing in endoplasmic reticulum;ko04120//Ubiquitin mediated proteolysis;ko04310//Wnt signaling pathway;ko04110//Cell cycle;ko04114//Oocyte meiosis;ko04066//HIF-1 signaling pathway;ko04350//TGF-beta signaling pathway;ko03420//Nucleotide excision repair;ko05211//Renal cell carcinoma;ko04710//Circadian rhythm	K03868	GO:0070013//intracellular organelle lumen;GO:0005829//cytosol;GO:0031981//nuclear lumen;GO:0043231//intracellular membrane-bounded organelle;GO:0044422//organelle part;GO:0044444//cytoplasmic part;GO:0032991//macromolecular complex;GO:0044428//nuclear part;GO:0005622//intracellular;GO:0005634//nucleus;GO:0044464//cell part;GO:0005737//cytoplasm;GO:0043227//membrane-bounded organelle;GO:0005623//c…	GO:0003674//molecular_function;GO:0019899//enzyme binding;GO:0016874//ligase activity;GO:0005515//protein binding;GO:0003824//catalytic activity;GO:0043167//ion binding;GO:0005488//binding	GO:0007154//cell communication;GO:0009987//cellular process;GO:0044419//interspecies interaction between organisms;GO:0008150//biological_process;GO:0050794//regulation of cellular process;GO:0043170//macromolecule metabolic process;GO:0050789//regulation of biological process;GO:0019538//protein metabolic process;GO:0006725//cellular aromatic compound metabolic process;GO:0009056//catabolic proc…
ENSG00000100401	13497	5631	206.087	111.62	-1.21143	0.0049721	0.0412662	down	RANGAP1	-	Genetic Information Processing	Translation	ko03013//RNA transport	K14319	GO:0005622//intracellular;GO:0031975//envelope;GO:0005623//cell;GO:0005829//cytosol;GO:0043232//intracellular non-membrane-bounded organelle;GO:0032991//macromolecular complex;GO:0043226//organelle;GO:0005575//cellular_component;GO:0044422//organelle part;GO:0005694//chromosome;GO:0031967//organelle envelope;GO:0044464//cell part;GO:0043231//intracellular membrane-bounded organelle;GO:0005634//nu…	GO:0003674//molecular_function;GO:0098772//molecular function regulator;GO:0030234//enzyme regulator activity	GO:0050789//regulation of biological process;GO:0050896//response to stimulus;GO:0007154//cell communication;GO:0009987//cellular process;GO:0044700//single organism signaling;GO:0050794//regulation of cellular process;GO:0023052//signaling;GO:0007049//cell cycle;GO:0007165//signal transduction;GO:0065007//biological regulation;GO:0008150//biological_process;GO:0044699//single-organism process;GO…
ENSG00000100410	1562	735.667	96.55	55.4233	-1.06515	0.00414929	0.0368542	down	PHF5A	PHD finger protein 5A [Source:HGNC Symbol;Acc:18000]	Genetic Information Processing	Transcription	ko03040//Spliceosome	K12834	GO:0044464//cell part;GO:0070013//intracellular organelle lumen;GO:0043229//intracellular organelle;GO:0043233//organelle lumen;GO:0044422//organelle part;GO:0044446//intracellular organelle part;GO:0005654//nucleoplasm;GO:0043227//membrane-bounded organelle;GO:0005623//cell;GO:0005575//cellular_component;GO:0043226//organelle;GO:0031974//membrane-enclosed lumen;GO:0031981//nuclear lumen;GO:00056…	GO:0001071//nucleic acid binding transcription factor activity;GO:1901363//heterocyclic compound binding;GO:0003674//molecular_function;GO:0003676//nucleic acid binding;GO:0005488//binding;GO:0003677//DNA binding;GO:0097159//organic cyclic compound binding	GO:0016070//RNA metabolic process;GO:0010467//gene expression;GO:0008152//metabolic process;GO:1901360//organic cyclic compound metabolic process;GO:0016071//mRNA metabolic process;GO:0043170//macromolecule metabolic process;GO:0009987//cellular process;GO:0046483//heterocycle metabolic process;GO:0044237//cellular metabolic process;GO:0006397//mRNA processing;GO:0044238//primary metabolic proces…
ENSG00000100413	2656.81	995.027	73.4333	30.9033	-1.37387	0.00100294	0.0164565	down	POLR3H	polymerase (RNA) III (DNA directed) polypeptide H (22.9kD) [Source:HGNC Symbol;Acc:30349]	Genetic Information Processing;Organismal Systems;Metabolism;Human Diseases	Immune system;Nucleotide metabolism;Infectious diseases;Transcription	ko05169//Epstein-Barr virus infection;ko00230//Purine metabolism;ko00240//Pyrimidine metabolism;ko04623//Cytosolic DNA-sensing pathway;ko03020//RNA polymerase	K03022	GO:0043226//organelle;GO:0015630//microtubule cytoskeleton;GO:0044428//nuclear part;GO:0043232//intracellular non-membrane-bounded organelle;GO:0005575//cellular_component;GO:0044424//intracellular part;GO:0043233//organelle lumen;GO:0005654//nucleoplasm;GO:0043234//protein complex;GO:0031981//nuclear lumen;GO:0043227//membrane-bounded organelle;GO:0043228//non-membrane-bounded organelle;GO:00058…	GO:0003676//nucleic acid binding;GO:0097159//organic cyclic compound binding;GO:0016740//transferase activity;GO:1901363//heterocyclic compound binding;GO:0016772//transferase activity, transferring phosphorus-containing groups;GO:0003677//DNA binding;GO:0003824//catalytic activity;GO:0003674//molecular_function;GO:0016779//nucleotidyltransferase activity;GO:0005488//binding	GO:0009987//cellular process;GO:0002376//immune system process;GO:0006807//nitrogen compound metabolic process;GO:0050896//response to stimulus;GO:0008152//metabolic process;GO:0008150//biological_process;GO:0044237//cellular metabolic process;GO:0006950//response to stress;GO:0034641//cellular nitrogen compound metabolic process;GO:0009058//biosynthetic process
ENSG00000100441	804.283	1867.07	9.11667	26.4467	1.23124	0.00369921	0.0343382	up	KHNYN	KH and NYN domain containing [Source:HGNC Symbol;Acc:20166]	-	-	-	-	GO:0005575//cellular_component	GO:0003674//molecular_function	GO:0008150//biological_process
ENSG00000100445	612.383	250.26	35.5967	16.6567	-1.2413	0.00598703	0.0458803	down	SDR39U1	short chain dehydrogenase/reductase family 39U, member 1 [Source:HGNC Symbol;Acc:20275]	-	-	-	-	-	GO:0003824//catalytic activity;GO:0016491//oxidoreductase activity;GO:0003674//molecular_function	GO:0008150//biological_process
ENSG00000100580	341.333	718	2.12667	5.18667	1.10125	0.00550938	0.043726	up	TMED8	transmembrane emp24 protein transport domain containing 8 [Source:HGNC Symbol;Acc:18633]	-	-	-	-	GO:0005575//cellular_component	-	GO:0051234//establishment of localization;GO:0051179//localization;GO:0008150//biological_process;GO:0006810//transport
ENSG00000100628	58	17.6667	1.21667	0.49	-1.67205	0.000882644	0.0151947	down	ASB2	ankyrin repeat and SOCS box containing 2 [Source:HGNC Symbol;Acc:16012]	-	-	-	-	GO:0043234//protein complex;GO:0005622//intracellular;GO:0005575//cellular_component;GO:0044464//cell part;GO:0032991//macromolecular complex;GO:0005623//cell	GO:0003824//catalytic activity;GO:0016874//ligase activity;GO:0003674//molecular_function	GO:0044763//single-organism cellular process;GO:0006464//cellular protein modification process;GO:0048856//anatomical structure development;GO:0044699//single-organism process;GO:0007165//signal transduction;GO:0030154//cell differentiation;GO:0050789//regulation of biological process;GO:0044237//cellular metabolic process;GO:0008150//biological_process;GO:0050794//regulation of cellular process;…
ENSG00000100697	712.667	1904	6.04667	26.0233	1.4409	0.00340668	0.0329111	up	DICER1	dicer 1, ribonuclease type III [Source:HGNC Symbol;Acc:17098]	Human Diseases	Cancers	ko05206//MicroRNAs in cancer	K11592	GO:0044464//cell part;GO:0005623//cell;GO:0005737//cytoplasm;GO:0044424//intracellular part;GO:0005829//cytosol;GO:0005575//cellular_component;GO:0005622//intracellular;GO:0044444//cytoplasmic part	GO:0003674//molecular_function;GO:0004386//helicase activity;GO:0003723//RNA binding;GO:0003676//nucleic acid binding;GO:1901363//heterocyclic compound binding;GO:0004518//nuclease activity;GO:0005488//binding;GO:0003677//DNA binding;GO:0016787//hydrolase activity;GO:0097159//organic cyclic compound binding;GO:0017111//nucleoside-triphosphatase activity;GO:0043167//ion binding;GO:0003824//catalyt…	GO:0070271//protein complex biogenesis;GO:0050896//response to stimulus;GO:0008152//metabolic process;GO:0044707//single-multicellular organism process;GO:0009653//anatomical structure morphogenesis;GO:0007010//cytoskeleton organization;GO:0007049//cell cycle;GO:0000902//cell morphogenesis;GO:0003008//system process;GO:0006461//protein complex assembly;GO:0071840//cellular component organization …
ENSG00000100726	2414.67	1008.67	43.2467	20.8433	-1.21255	0.00460147	0.0393452	down	TELO2	-	Genetic Information Processing	Replication and repair	ko03460//Fanconi anemia pathway	K11137	GO:0005575//cellular_component;GO:0044464//cell part;GO:0043227//membrane-bounded organelle;GO:0043228//non-membrane-bounded organelle;GO:0043231//intracellular membrane-bounded organelle;GO:0043232//intracellular non-membrane-bounded organelle;GO:0044424//intracellular part;GO:0005694//chromosome;GO:0032991//macromolecular complex;GO:0043226//organelle;GO:0005737//cytoplasm;GO:0043229//intracell…	GO:0003674//molecular_function;GO:0005198//structural molecule activity	GO:0008150//biological_process
ENSG00000100804	4851.33	2063	231.423	123.95	-1.19583	0.00608885	0.0462686	down	PSMB5	-	Genetic Information Processing	Folding, sorting and degradation	ko03050//Proteasome	K02737	GO:0032991//macromolecular complex;GO:0005623//cell;GO:0031974//membrane-enclosed lumen;GO:0005654//nucleoplasm;GO:0043233//organelle lumen;GO:0005622//intracellular;GO:0044424//intracellular part;GO:0043226//organelle;GO:0043227//membrane-bounded organelle;GO:0005737//cytoplasm;GO:0044446//intracellular organelle part;GO:0005634//nucleus;GO:0044422//organelle part;GO:0044444//cytoplasmic part;GO…	GO:0003674//molecular_function;GO:0016787//hydrolase activity;GO:0008233//peptidase activity;GO:0003824//catalytic activity	GO:0051704//multi-organism process;GO:0044281//small molecule metabolic process;GO:0006950//response to stress;GO:0071704//organic substance metabolic process;GO:0007049//cell cycle;GO:0044763//single-organism cellular process;GO:0044237//cellular metabolic process;GO:0008150//biological_process;GO:0019538//protein metabolic process;GO:0002376//immune system process;GO:0044403//symbiosis, encompa…
ENSG00000100815	551.683	1199.01	6.90333	13.9967	1.14998	0.00474354	0.040119	up	TRIP11	-	-	-	-	-	GO:0030529//intracellular ribonucleoprotein complex;GO:0005575//cellular_component;GO:0032991//macromolecular complex;GO:0043232//intracellular non-membrane-bounded organelle;GO:0005622//intracellular;GO:0005794//Golgi apparatus;GO:0043228//non-membrane-bounded organelle;GO:0044424//intracellular part;GO:0043229//intracellular organelle;GO:0005623//cell;GO:0043226//organelle;GO:0043227//membrane-…	GO:0003735//structural constituent of ribosome;GO:0000988//transcription factor activity, protein binding;GO:0003674//molecular_function;GO:0005198//structural molecule activity	GO:0043043//peptide biosynthetic process;GO:0019538//protein metabolic process;GO:0071704//organic substance metabolic process;GO:1901564//organonitrogen compound metabolic process;GO:0044267//cellular protein metabolic process;GO:0006807//nitrogen compound metabolic process;GO:0034613//cellular protein localization;GO:0006412//translation;GO:0008150//biological_process;GO:0006810//transport;GO:0…
ENSG00000100836	4555.68	1753.35	120.607	65.0467	-1.33312	0.00279212	0.0294737	down	PABPN1	poly(A) binding protein, nuclear 1 [Source:HGNC Symbol;Acc:8565]	Genetic Information Processing;Human Diseases	Infectious diseases;Translation	ko05164//Influenza A;ko03015//mRNA surveillance pathway	K14396	GO:0043231//intracellular membrane-bounded organelle;GO:0005622//intracellular;GO:0005737//cytoplasm;GO:0044446//intracellular organelle part;GO:0044424//intracellular part;GO:0031981//nuclear lumen;GO:0070013//intracellular organelle lumen;GO:0044428//nuclear part;GO:0043233//organelle lumen;GO:0043229//intracellular organelle;GO:0044464//cell part;GO:0031974//membrane-enclosed lumen;GO:0005575/…	GO:0097159//organic cyclic compound binding;GO:0005488//binding;GO:0003674//molecular_function;GO:0003723//RNA binding;GO:0003676//nucleic acid binding;GO:1901363//heterocyclic compound binding	GO:0006807//nitrogen compound metabolic process;GO:1901360//organic cyclic compound metabolic process;GO:0044260//cellular macromolecule metabolic process;GO:0044403//symbiosis, encompassing mutualism through parasitism;GO:0043170//macromolecule metabolic process;GO:0009987//cellular process;GO:0010467//gene expression;GO:0016071//mRNA metabolic process;GO:0090304//nucleic acid metabolic process;…
ENSG00000100906	1463.33	683.667	59.63	35.72	-1.07877	0.00267397	0.0287122	down	NFKBIA	-	Cellular Processes;Organismal Systems;Environmental Information Processing;Human Diseases	Endocrine and metabolic diseases;Nervous system;Cell growth and death;Infectious diseases;Cancers;Endocrine system;Signal transduction;Immune system;Development	ko05203//Viral carcinogenesis;ko05200//Pathways in cancer;ko05166//HTLV-I infection;ko05168//Herpes simplex infection;ko05169//Epstein-Barr virus infection;ko05164//Influenza A;ko05145//Toxoplasmosis;ko04024//cAMP signaling pathway;ko04062//Chemokine signaling pathway;ko04380//Osteoclast differentiation;ko05162//Measles;ko05161//Hepatitis B;ko05140//Leishmaniasis;ko05160//Hepatitis C;ko05142//Cha…	K04734	GO:0005623//cell;GO:0071944//cell periphery;GO:0044424//intracellular part;GO:0044444//cytoplasmic part;GO:0005829//cytosol;GO:0005737//cytoplasm;GO:0005886//plasma membrane;GO:0016020//membrane;GO:0043234//protein complex;GO:0043226//organelle;GO:0005575//cellular_component;GO:0032991//macromolecular complex;GO:0043229//intracellular organelle;GO:0043227//membrane-bounded organelle;GO:0005634//n…	GO:0005488//binding;GO:0008134//transcription factor binding;GO:0003674//molecular_function;GO:0005515//protein binding;GO:0019899//enzyme binding	GO:0050789//regulation of biological process;GO:0044763//single-organism cellular process;GO:0044419//interspecies interaction between organisms;GO:0007154//cell communication;GO:0008150//biological_process;GO:0008219//cell death;GO:0051179//localization;GO:0009987//cellular process;GO:0045184//establishment of protein localization;GO:0033036//macromolecule localization;GO:0071702//organic substa…
ENSG00000100908	809.667	240.333	60.93	27.67	-1.68194	0.00261414	0.0284411	down	EMC9	-	-	-	-	-	GO:0005622//intracellular;GO:0012505//endomembrane system;GO:0005623//cell;GO:0043234//protein complex;GO:0005783//endoplasmic reticulum;GO:0044464//cell part;GO:0044444//cytoplasmic part;GO:0005575//cellular_component;GO:0044424//intracellular part;GO:0043227//membrane-bounded organelle;GO:0005737//cytoplasm;GO:0043226//organelle;GO:0043231//intracellular membrane-bounded organelle;GO:0043229//i…	-	-
ENSG00000100911	1991	555.667	133.627	44.63	-1.78947	0.000196466	0.00693452	down	PSME2	-	Genetic Information Processing;Organismal Systems	Immune system;Folding, sorting and degradation	ko04612//Antigen processing and presentation;ko03050//Proteasome	K06697	GO:0005829//cytosol;GO:0043233//organelle lumen;GO:0005623//cell;GO:0031981//nuclear lumen;GO:0005654//nucleoplasm;GO:0044464//cell part;GO:0005634//nucleus;GO:0043227//membrane-bounded organelle;GO:0044444//cytoplasmic part;GO:0005575//cellular_component;GO:0044424//intracellular part;GO:0031974//membrane-enclosed lumen;GO:0043231//intracellular membrane-bounded organelle;GO:0043226//organelle;G…	-	GO:0002376//immune system process;GO:0008219//cell death;GO:0051716//cellular response to stimulus;GO:0071704//organic substance metabolic process;GO:0050896//response to stimulus;GO:0044260//cellular macromolecule metabolic process;GO:0044267//cellular protein metabolic process;GO:0043412//macromolecule modification;GO:0007049//cell cycle;GO:0044238//primary metabolic process;GO:0044710//single-…
ENSG00000101040	747.667	1813	9.07	29.9267	1.29955	0.00185415	0.0233712	up	ZMYND8	-	-	-	-	-	GO:0044424//intracellular part;GO:0043229//intracellular organelle;GO:0005622//intracellular;GO:0043231//intracellular membrane-bounded organelle;GO:0044464//cell part;GO:0043227//membrane-bounded organelle;GO:0005634//nucleus;GO:0005623//cell;GO:0043226//organelle;GO:0005575//cellular_component	GO:0005488//binding;GO:0016301//kinase activity;GO:0008134//transcription factor binding;GO:0016740//transferase activity;GO:0005515//protein binding;GO:0016772//transferase activity, transferring phosphorus-containing groups;GO:0003674//molecular_function;GO:0000988//transcription factor activity, protein binding;GO:0043167//ion binding;GO:0003824//catalytic activity	GO:0008150//biological_process
ENSG00000101084	3778.39	1493.18	212.893	107.547	-1.30621	0.00177081	0.0227013	down	C20orf24	chromosome 20 open reading frame 24 [Source:HGNC Symbol;Acc:15870]	-	-	-	-	GO:0005575//cellular_component	GO:0003674//molecular_function	GO:0008150//biological_process
ENSG00000101182	12682	4030.33	799.807	342.323	-1.60608	0.000850815	0.0148302	down	PSMA7	proteasome (prosome, macropain) subunit, alpha type, 7 [Source:HGNC Symbol;Acc:9536]	Genetic Information Processing	Folding, sorting and degradation	ko03050//Proteasome	K02731	GO:0070013//intracellular organelle lumen;GO:0043234//protein complex;GO:0043229//intracellular organelle;GO:0044422//organelle part;GO:0005622//intracellular;GO:0005575//cellular_component;GO:0043226//organelle;GO:0043233//organelle lumen;GO:0005623//cell;GO:0005737//cytoplasm;GO:0044464//cell part;GO:0005829//cytosol;GO:0031974//membrane-enclosed lumen;GO:0043227//membrane-bounded organelle;GO:…	GO:0008233//peptidase activity;GO:0003674//molecular_function;GO:0016787//hydrolase activity;GO:0003824//catalytic activity	GO:0044700//single organism signaling;GO:0007154//cell communication;GO:0044419//interspecies interaction between organisms;GO:0007165//signal transduction;GO:0071704//organic substance metabolic process;GO:0009056//catabolic process;GO:0036211//protein modification process;GO:0006464//cellular protein modification process;GO:0044267//cellular protein metabolic process;GO:0006807//nitrogen compou…
ENSG00000101197	27.6667	5.33333	1.08333	0.28	-2.28545	0.00325146	0.0321209	down	BIRC7	baculoviral IAP repeat containing 7 [Source:HGNC Symbol;Acc:13702]	Genetic Information Processing;Cellular Processes;Human Diseases	Cell growth and death;Infectious diseases;Folding, sorting and degradation;Cancers	ko05200//Pathways in cancer;ko05145//Toxoplasmosis;ko04120//Ubiquitin mediated proteolysis;ko04210//Apoptosis;ko05222//Small cell lung cancer	K16061	GO:0005634//nucleus;GO:0005575//cellular_component;GO:0012505//endomembrane system;GO:0044464//cell part;GO:0043231//intracellular membrane-bounded organelle;GO:0005622//intracellular;GO:0005794//Golgi apparatus;GO:0043226//organelle;GO:0043229//intracellular organelle;GO:0005737//cytoplasm;GO:0005623//cell;GO:0044424//intracellular part;GO:0043227//membrane-bounded organelle;GO:0044444//cytoplas…	GO:0043167//ion binding;GO:0003674//molecular_function;GO:0005488//binding;GO:0016874//ligase activity;GO:0098772//molecular function regulator;GO:0005515//protein binding;GO:0003824//catalytic activity;GO:0030234//enzyme regulator activity;GO:0019899//enzyme binding	GO:0044248//cellular catabolic process;GO:0036211//protein modification process;GO:0019439//aromatic compound catabolic process;GO:0043170//macromolecule metabolic process;GO:0008219//cell death;GO:0044763//single-organism cellular process;GO:0007154//cell communication;GO:1901360//organic cyclic compound metabolic process;GO:0050789//regulation of biological process;GO:0006807//nitrogen compound…
ENSG00000101220	3942.67	784.667	136.01	34.7833	-2.25776	0.000128851	0.00538621	down	C20orf27	chromosome 20 open reading frame 27 [Source:HGNC Symbol;Acc:15873]	-	-	-	-	GO:0005575//cellular_component	GO:0003674//molecular_function	GO:0008150//biological_process
ENSG00000101222	72.3333	6.33333	2.21667	0.266667	-3.42935	1.82022e-05	0.00169759	down	SPEF1	sperm flagellar 1 [Source:HGNC Symbol;Acc:15874]	-	-	-	-	GO:0043228//non-membrane-bounded organelle;GO:0005623//cell;GO:0043226//organelle;GO:0005622//intracellular;GO:0043229//intracellular organelle;GO:0005737//cytoplasm;GO:0005929//cilium;GO:0042995//cell projection;GO:0044424//intracellular part;GO:0043232//intracellular non-membrane-bounded organelle;GO:0044464//cell part;GO:0005856//cytoskeleton;GO:0005575//cellular_component	GO:0003674//molecular_function	GO:0008150//biological_process
ENSG00000101246	1319.67	411.667	43.0833	19.9667	-1.61763	0.00248107	0.0276404	down	ARFRP1	ADP-ribosylation factor related protein 1 [Source:HGNC Symbol;Acc:662]	-	-	-	-	GO:0005794//Golgi apparatus;GO:0005623//cell;GO:0043229//intracellular organelle;GO:0012505//endomembrane system;GO:0044444//cytoplasmic part;GO:0005622//intracellular;GO:0005634//nucleus;GO:0043226//organelle;GO:0044464//cell part;GO:0043231//intracellular membrane-bounded organelle;GO:0043227//membrane-bounded organelle;GO:0005575//cellular_component;GO:0005737//cytoplasm;GO:0044424//intracellu…	GO:0016787//hydrolase activity;GO:0003824//catalytic activity;GO:0016462//pyrophosphatase activity;GO:0017111//nucleoside-triphosphatase activity;GO:0016817//hydrolase activity, acting on acid anhydrides;GO:0003924//GTPase activity;GO:0043167//ion binding;GO:0004871//signal transducer activity;GO:0016818//hydrolase activity, acting on acid anhydrides, in phosphorus-containing anhydrides;GO:000367…	GO:0046700//heterocycle catabolic process;GO:0044802//single-organism membrane organization;GO:0044238//primary metabolic process;GO:0007165//signal transduction;GO:0006725//cellular aromatic compound metabolic process;GO:0034641//cellular nitrogen compound metabolic process;GO:1901360//organic cyclic compound metabolic process;GO:0010256//endomembrane system organization;GO:0051716//cellular res…
ENSG00000101265	43.3333	216.333	0.406667	2.28667	2.33059	1.10241e-07	2.77027e-05	up	RASSF2	Ras association (RalGDS/AF-6) domain family member 2 [Source:HGNC Symbol;Acc:9883]	-	-	-	-	GO:0005634//nucleus;GO:0043227//membrane-bounded organelle;GO:0005622//intracellular;GO:0005575//cellular_component;GO:0043229//intracellular organelle;GO:0044424//intracellular part;GO:0043226//organelle;GO:0044464//cell part;GO:0005737//cytoplasm;GO:0043231//intracellular membrane-bounded organelle;GO:0005623//cell	GO:0003674//molecular_function	GO:0044699//single-organism process;GO:0050794//regulation of cellular process;GO:0051716//cellular response to stimulus;GO:0007165//signal transduction;GO:0008150//biological_process;GO:0044763//single-organism cellular process;GO:0009987//cellular process;GO:0023052//signaling;GO:0050896//response to stimulus;GO:0044700//single organism signaling;GO:0007154//cell communication;GO:0050789//regul…
ENSG00000101306	120.667	28.6667	3.14667	0.866667	-2.02788	0.000158818	0.00612685	down	MYLK2	myosin light chain kinase 2 [Source:HGNC Symbol;Acc:16243]	Organismal Systems;Cellular Processes;Environmental Information Processing	Cellular commiunity;Immune system;Signal transduction;Cell motility;Digestive system;Circulatory system;Endocrine system	ko04510//Focal adhesion;ko04810//Regulation of actin cytoskeleton;ko04020//Calcium signaling pathway;ko04022//cGMP - PKG signaling pathway;ko04921//Oxytocin signaling pathway;ko04611//Platelet activation;ko04270//Vascular smooth muscle contraction;ko04971//Gastric acid secretion	K00907	GO:0043226//organelle;GO:0005623//cell;GO:0044464//cell part;GO:0043231//intracellular membrane-bounded organelle;GO:0005737//cytoplasm;GO:0044424//intracellular part;GO:0005634//nucleus;GO:0043229//intracellular organelle;GO:0005622//intracellular;GO:0043227//membrane-bounded organelle;GO:0005575//cellular_component	GO:0003824//catalytic activity;GO:0016740//transferase activity;GO:0005488//binding;GO:0003674//molecular_function;GO:0016301//kinase activity;GO:0043167//ion binding;GO:0016772//transferase activity, transferring phosphorus-containing groups	GO:0044767//single-organism developmental process;GO:0003008//system process;GO:0006464//cellular protein modification process;GO:0044237//cellular metabolic process;GO:0044699//single-organism process;GO:0008152//metabolic process;GO:0044763//single-organism cellular process;GO:0044238//primary metabolic process;GO:0071704//organic substance metabolic process;GO:0007267//cell-cell signaling;GO:0…
ENSG00000101335	83.3333	24	4.04667	1.59333	-1.72084	0.00411367	0.0367005	down	MYL9	myosin, light chain 9, regulatory [Source:HGNC Symbol;Acc:15754]	Organismal Systems;Cellular Processes;Environmental Information Processing	Cellular commiunity;Immune system;Signal transduction;Cell motility;Circulatory system;Endocrine system	ko04510//Focal adhesion;ko04810//Regulation of actin cytoskeleton;ko04024//cAMP signaling pathway;ko04022//cGMP - PKG signaling pathway;ko04921//Oxytocin signaling pathway;ko04530//Tight junction;ko04270//Vascular smooth muscle contraction;ko04670//Leukocyte transendothelial migration	K12755	GO:0043232//intracellular non-membrane-bounded organelle;GO:0044424//intracellular part;GO:0043229//intracellular organelle;GO:0044444//cytoplasmic part;GO:0005829//cytosol;GO:0043226//organelle;GO:0032991//macromolecular complex;GO:0005575//cellular_component;GO:0005623//cell;GO:0043234//protein complex;GO:0005856//cytoskeleton;GO:0005622//intracellular;GO:0043228//non-membrane-bounded organelle…	GO:0003674//molecular_function;GO:0043167//ion binding;GO:0005488//binding;GO:0005198//structural molecule activity	GO:0044699//single-organism process;GO:0032502//developmental process;GO:0030154//cell differentiation;GO:0032989//cellular component morphogenesis;GO:0044767//single-organism developmental process;GO:0048869//cellular developmental process;GO:0040011//locomotion;GO:0071840//cellular component organization or biogenesis;GO:0008150//biological_process;GO:0000902//cell morphogenesis;GO:0016043//cel…
ENSG00000101361	5331	2176.67	244.387	114.357	-1.2539	0.00146093	0.0202019	down	NOP56	-	Genetic Information Processing	Translation	ko03008//Ribosome biogenesis in eukaryotes	K14564	GO:0043233//organelle lumen;GO:0043226//organelle;GO:0005730//nucleolus;GO:0044428//nuclear part;GO:0043231//intracellular membrane-bounded organelle;GO:0044424//intracellular part;GO:0031974//membrane-enclosed lumen;GO:0043227//membrane-bounded organelle;GO:0031981//nuclear lumen;GO:0043228//non-membrane-bounded organelle;GO:0070013//intracellular organelle lumen;GO:0044446//intracellular organe…	GO:0003676//nucleic acid binding;GO:1901363//heterocyclic compound binding;GO:0003723//RNA binding;GO:0003674//molecular_function;GO:0097159//organic cyclic compound binding;GO:0005488//binding	GO:0006807//nitrogen compound metabolic process;GO:0044237//cellular metabolic process;GO:0008150//biological_process;GO:0008219//cell death;GO:0042254//ribosome biogenesis;GO:0034641//cellular nitrogen compound metabolic process;GO:0022613//ribonucleoprotein complex biogenesis;GO:0044699//single-organism process;GO:0009987//cellular process;GO:0044763//single-organism cellular process;GO:0008152…
ENSG00000101363	2231.67	945.667	100.127	54.2033	-1.18934	0.0059829	0.0458803	down	MANBAL	mannosidase, beta A, lysosomal-like [Source:HGNC Symbol;Acc:15799]	-	-	-	-	GO:0005575//cellular_component	-	-
ENSG00000101412	4218.67	1945.33	82.2967	48.24	-1.0764	0.00660337	0.0487652	down	E2F1	E2F transcription factor 1 [Source:HGNC Symbol;Acc:3113]	Cellular Processes;Human Diseases	Cell growth and death;Infectious diseases;Cancers	ko05200//Pathways in cancer;ko05166//HTLV-I infection;ko05161//Hepatitis B;ko05206//MicroRNAs in cancer;ko04110//Cell cycle;ko05222//Small cell lung cancer;ko05215//Prostate cancer;ko05220//Chronic myeloid leukemia;ko05214//Glioma;ko05212//Pancreatic cancer;ko05218//Melanoma;ko05223//Non-small cell lung cancer;ko05219//Bladder cancer	K17454	GO:0044428//nuclear part;GO:0031974//membrane-enclosed lumen;GO:0043231//intracellular membrane-bounded organelle;GO:0005575//cellular_component;GO:0043227//membrane-bounded organelle;GO:0044422//organelle part;GO:0043229//intracellular organelle;GO:0043226//organelle;GO:0005654//nucleoplasm;GO:0043234//protein complex;GO:0005737//cytoplasm;GO:0032991//macromolecular complex;GO:0043233//organelle…	GO:0003677//DNA binding;GO:0005488//binding;GO:0003676//nucleic acid binding;GO:0008134//transcription factor binding;GO:0097159//organic cyclic compound binding;GO:0001071//nucleic acid binding transcription factor activity;GO:0003674//molecular_function;GO:0005515//protein binding;GO:1901363//heterocyclic compound binding;GO:0000988//transcription factor activity, protein binding	GO:0044763//single-organism cellular process;GO:0007154//cell communication;GO:0044699//single-organism process;GO:0050794//regulation of cellular process;GO:0008150//biological_process;GO:0009987//cellular process;GO:0044700//single organism signaling;GO:0008152//metabolic process;GO:0023052//signaling;GO:0044237//cellular metabolic process;GO:0008283//cell proliferation;GO:0009058//biosynthetic…
ENSG00000101439	9607.67	2543.67	714.633	264.667	-1.85313	0.000641363	0.0127659	down	CST3	cystatin C [Source:HGNC Symbol;Acc:2475]	Organismal Systems	Digestive system	ko04970//Salivary secretion	K13899	GO:0044421//extracellular region part;GO:0005615//extracellular space;GO:0005575//cellular_component;GO:0005576//extracellular region	GO:0005515//protein binding;GO:0098772//molecular function regulator;GO:0003674//molecular_function;GO:0019899//enzyme binding;GO:0030234//enzyme regulator activity;GO:0005488//binding	GO:0043062//extracellular structure organization;GO:0030198//extracellular matrix organization;GO:0071840//cellular component organization or biogenesis;GO:0050896//response to stimulus;GO:0016043//cellular component organization;GO:0009987//cellular process;GO:0044699//single-organism process;GO:0006950//response to stress;GO:0044763//single-organism cellular process;GO:0008150//biological_proce…
ENSG00000101639	747	1965.67	12.89	18.85	1.41284	0.00284981	0.0297872	up	CEP192	-	-	-	-	-	GO:0005829//cytosol;GO:0044446//intracellular organelle part;GO:0005622//intracellular;GO:0044444//cytoplasmic part;GO:0044430//cytoskeletal part;GO:0043226//organelle;GO:0005856//cytoskeleton;GO:0043229//intracellular organelle;GO:0043228//non-membrane-bounded organelle;GO:0044422//organelle part;GO:0015630//microtubule cytoskeleton;GO:0005575//cellular_component;GO:0044424//intracellular part;G…	GO:0003674//molecular_function;GO:0005488//binding;GO:0005515//protein binding;GO:0019899//enzyme binding	GO:0022607//cellular component assembly;GO:0044699//single-organism process;GO:0008150//biological_process;GO:0006996//organelle organization;GO:0009987//cellular process;GO:0044085//cellular component biogenesis;GO:0007049//cell cycle;GO:0043933//macromolecular complex subunit organization;GO:0065003//macromolecular complex assembly;GO:0016043//cellular component organization;GO:0044763//single-…
ENSG00000101751	157.333	521.667	4.39333	15.1233	1.74056	4.22763e-05	0.00296669	up	POLI	polymerase (DNA directed) iota [Source:HGNC Symbol;Acc:9182]	Genetic Information Processing	Replication and repair	ko03460//Fanconi anemia pathway	K03510	GO:0005575//cellular_component;GO:0044446//intracellular organelle part;GO:0070013//intracellular organelle lumen;GO:0043226//organelle;GO:0031981//nuclear lumen;GO:0044422//organelle part;GO:0005622//intracellular;GO:0043231//intracellular membrane-bounded organelle;GO:0005623//cell;GO:0044464//cell part;GO:0044428//nuclear part;GO:0043233//organelle lumen;GO:0005654//nucleoplasm;GO:0043227//mem…	GO:0097159//organic cyclic compound binding;GO:0003824//catalytic activity;GO:0003674//molecular_function;GO:0016772//transferase activity, transferring phosphorus-containing groups;GO:1901363//heterocyclic compound binding;GO:0003677//DNA binding;GO:0005488//binding;GO:0003676//nucleic acid binding;GO:0043167//ion binding;GO:0016779//nucleotidyltransferase activity;GO:0016740//transferase activi…	GO:0050896//response to stimulus;GO:0090304//nucleic acid metabolic process;GO:0006725//cellular aromatic compound metabolic process;GO:0044238//primary metabolic process;GO:0006950//response to stress;GO:1901360//organic cyclic compound metabolic process;GO:0044260//cellular macromolecule metabolic process;GO:0008150//biological_process;GO:0046483//heterocycle metabolic process;GO:0006139//nucle…
ENSG00000101752	1241.67	3316.67	6.93667	20.9	1.43762	0.0024448	0.0273951	up	MIB1	mindbomb E3 ubiquitin protein ligase 1 [Source:HGNC Symbol;Acc:21086]	-	-	-	-	GO:0005856//cytoskeleton;GO:0044424//intracellular part;GO:0043232//intracellular non-membrane-bounded organelle;GO:0043228//non-membrane-bounded organelle;GO:0005886//plasma membrane;GO:0071944//cell periphery;GO:0044422//organelle part;GO:0005829//cytosol;GO:0043226//organelle;GO:0005737//cytoplasm;GO:0044430//cytoskeletal part;GO:0016020//membrane;GO:0005623//cell;GO:0005635//nuclear envelope;…	GO:0005488//binding;GO:0003674//molecular_function;GO:0043167//ion binding;GO:0016874//ligase activity;GO:0003824//catalytic activity	GO:0048869//cellular developmental process;GO:0044767//single-organism developmental process;GO:0050789//regulation of biological process;GO:0048646//anatomical structure formation involved in morphogenesis;GO:0050896//response to stimulus;GO:0008152//metabolic process;GO:0007165//signal transduction;GO:0030154//cell differentiation;GO:0009790//embryo development;GO:0044267//cellular protein meta…
ENSG00000101782	2170.67	4853.33	42.6867	103.163	1.18565	0.0019571	0.0241212	up	RIOK3	RIO kinase 3 [Source:HGNC Symbol;Acc:11451]	-	-	-	-	GO:0005575//cellular_component	GO:0005488//binding;GO:0003674//molecular_function;GO:0016740//transferase activity;GO:0043167//ion binding;GO:0016772//transferase activity, transferring phosphorus-containing groups;GO:0003824//catalytic activity;GO:0016301//kinase activity	GO:0044260//cellular macromolecule metabolic process;GO:0044237//cellular metabolic process;GO:0036211//protein modification process;GO:0005975//carbohydrate metabolic process;GO:0044267//cellular protein metabolic process;GO:0044763//single-organism cellular process;GO:0043170//macromolecule metabolic process;GO:0009058//biosynthetic process;GO:0006629//lipid metabolic process;GO:0007059//chromo…
ENSG00000102030	3400.85	873.667	260.487	128.733	-1.90779	0.000249871	0.00784883	down	NAA10	N(alpha)-acetyltransferase 10, NatA catalytic subunit [Source:HGNC Symbol;Acc:18704]	-	-	-	-	GO:0043226//organelle;GO:0043231//intracellular membrane-bounded organelle;GO:0005623//cell;GO:0005737//cytoplasm;GO:0005622//intracellular;GO:0043227//membrane-bounded organelle;GO:0044464//cell part;GO:0044424//intracellular part;GO:0043229//intracellular organelle;GO:0005575//cellular_component;GO:0005634//nucleus	GO:0016740//transferase activity;GO:0003824//catalytic activity;GO:0016746//transferase activity, transferring acyl groups;GO:0003674//molecular_function	GO:0006807//nitrogen compound metabolic process;GO:0006464//cellular protein modification process;GO:0044260//cellular macromolecule metabolic process;GO:0043170//macromolecule metabolic process;GO:0044238//primary metabolic process;GO:0044267//cellular protein metabolic process;GO:1901360//organic cyclic compound metabolic process;GO:0036211//protein modification process;GO:0006725//cellular aro…
ENSG00000102103	2868.33	834.333	185.427	75.28	-1.72633	0.000277914	0.00840851	down	PQBP1	polyglutamine binding protein 1 [Source:HGNC Symbol;Acc:9330]	Genetic Information Processing	Transcription	ko03040//Spliceosome	K12865	GO:0043231//intracellular membrane-bounded organelle;GO:0005622//intracellular;GO:0044424//intracellular part;GO:0005575//cellular_component;GO:0005623//cell;GO:0005634//nucleus;GO:0043229//intracellular organelle;GO:0005737//cytoplasm;GO:0043227//membrane-bounded organelle;GO:0044464//cell part;GO:0043226//organelle	GO:0097159//organic cyclic compound binding;GO:0003676//nucleic acid binding;GO:0003674//molecular_function;GO:0005488//binding;GO:0000988//transcription factor activity, protein binding;GO:1901363//heterocyclic compound binding;GO:0003677//DNA binding	GO:0022613//ribonucleoprotein complex biogenesis;GO:0071840//cellular component organization or biogenesis;GO:0009987//cellular process;GO:0009058//biosynthetic process;GO:0016043//cellular component organization;GO:0034622//cellular macromolecular complex assembly;GO:0008150//biological_process;GO:0065003//macromolecular complex assembly;GO:0071826//ribonucleoprotein complex subunit organization…
ENSG00000102109	4626.33	709.333	243.17	55.2167	-2.62163	0.000122787	0.00523958	down	PCSK1N	proprotein convertase subtilisin/kexin type 1 inhibitor [Source:HGNC Symbol;Acc:17301]	-	-	-	-	GO:0005737//cytoplasm;GO:0005576//extracellular region;GO:0012505//endomembrane system;GO:0044444//cytoplasmic part;GO:0031982//vesicle;GO:0005575//cellular_component;GO:0016023//cytoplasmic, membrane-bounded vesicle;GO:0005615//extracellular space;GO:0043226//organelle;GO:0043227//membrane-bounded organelle;GO:0005623//cell;GO:0005622//intracellular;GO:0044464//cell part;GO:0043229//intracellula…	GO:0030234//enzyme regulator activity;GO:0003674//molecular_function;GO:0098772//molecular function regulator	GO:0007165//signal transduction;GO:0006950//response to stress;GO:0008152//metabolic process;GO:0044700//single organism signaling;GO:0065007//biological regulation;GO:0050794//regulation of cellular process;GO:0051604//protein maturation;GO:0043170//macromolecule metabolic process;GO:0007154//cell communication;GO:0009987//cellular process;GO:0019538//protein metabolic process;GO:0044699//single…
ENSG00000102189	604	1563.67	3.56	9.76	1.39866	0.0036918	0.0342894	up	EEA1	early endosome antigen 1 [Source:HGNC Symbol;Acc:3185]	Cellular Processes;Human Diseases	Infectious diseases;Transport and catabolism	ko04144//Endocytosis;ko04145//Phagosome;ko05152//Tuberculosis	K12478	GO:0043234//protein complex;GO:0044464//cell part;GO:0005623//cell;GO:0005768//endosome;GO:0005829//cytosol;GO:0032991//macromolecular complex;GO:0005737//cytoplasm;GO:0016020//membrane;GO:0043226//organelle;GO:0043231//intracellular membrane-bounded organelle;GO:0005622//intracellular;GO:0043227//membrane-bounded organelle;GO:0005575//cellular_component;GO:0005886//plasma membrane;GO:0044444//cy…	GO:0043167//ion binding;GO:0005488//binding;GO:0008289//lipid binding;GO:0003674//molecular_function	GO:0016043//cellular component organization;GO:0044700//single organism signaling;GO:0044699//single-organism process;GO:0051179//localization;GO:0061024//membrane organization;GO:0016192//vesicle-mediated transport;GO:0050877//neurological system process;GO:0044763//single-organism cellular process;GO:0051234//establishment of localization;GO:0007267//cell-cell signaling;GO:0023052//signaling;GO…
ENSG00000102265	8904	2036	740.61	209.01	-2.06686	0.000181653	0.0066397	down	TIMP1	TIMP metallopeptidase inhibitor 1 [Source:HGNC Symbol;Acc:11820]	Environmental Information Processing	Signal transduction	ko04066//HIF-1 signaling pathway	K16451	GO:0005622//intracellular;GO:0043229//intracellular organelle;GO:0044464//cell part;GO:0043227//membrane-bounded organelle;GO:0005576//extracellular region;GO:0044444//cytoplasmic part;GO:0031988//membrane-bounded vesicle;GO:0016023//cytoplasmic, membrane-bounded vesicle;GO:0043231//intracellular membrane-bounded organelle;GO:0031012//extracellular matrix;GO:0005575//cellular_component;GO:0005623…	GO:0003674//molecular_function;GO:0005488//binding;GO:0030234//enzyme regulator activity;GO:0043167//ion binding;GO:0098772//molecular function regulator	GO:0044763//single-organism cellular process;GO:0043062//extracellular structure organization;GO:0006950//response to stress;GO:0044699//single-organism process;GO:0051234//establishment of localization;GO:0030154//cell differentiation;GO:0044767//single-organism developmental process;GO:0002376//immune system process;GO:0051179//localization;GO:0008150//biological_process;GO:0048856//anatomical …
ENSG00000102349	31.6667	110	0.493333	1.61333	1.82928	0.000100384	0.00479222	up	KLF8	-	-	-	-	-	GO:0043227//membrane-bounded organelle;GO:0043229//intracellular organelle;GO:0043226//organelle;GO:0044424//intracellular part;GO:0005622//intracellular;GO:0005575//cellular_component;GO:0043231//intracellular membrane-bounded organelle;GO:0005623//cell;GO:0044464//cell part;GO:0005634//nucleus	GO:0003677//DNA binding;GO:1901363//heterocyclic compound binding;GO:0003674//molecular_function;GO:0097159//organic cyclic compound binding;GO:0043167//ion binding;GO:0003676//nucleic acid binding;GO:0005488//binding	GO:0034641//cellular nitrogen compound metabolic process;GO:0009987//cellular process;GO:0044237//cellular metabolic process;GO:0009058//biosynthetic process;GO:0008150//biological_process;GO:0006807//nitrogen compound metabolic process;GO:0008152//metabolic process
ENSG00000102780	489.333	1800.03	2.04	7.18333	1.90138	0.000461973	0.0105985	up	DGKH	diacylglycerol kinase, eta [Source:HGNC Symbol;Acc:2854]	Environmental Information Processing;Human Diseases;Metabolism	Signal transduction;Cancers;Lipid metabolism	ko04070//Phosphatidylinositol signaling system;ko00564//Glycerophospholipid metabolism;ko05231//Choline metabolism in cancer;ko00561//Glycerolipid metabolism	K00901	GO:0043231//intracellular membrane-bounded organelle;GO:0005737//cytoplasm;GO:0044424//intracellular part;GO:0043226//organelle;GO:0071944//cell periphery;GO:0031967//organelle envelope;GO:0005773//vacuole;GO:0005886//plasma membrane;GO:0044446//intracellular organelle part;GO:0043229//intracellular organelle;GO:0005623//cell;GO:0031975//envelope;GO:0005635//nuclear envelope;GO:0044428//nuclear p…	GO:0016740//transferase activity;GO:0003674//molecular_function;GO:0005488//binding;GO:0043167//ion binding;GO:0016772//transferase activity, transferring phosphorus-containing groups;GO:0016301//kinase activity;GO:0003824//catalytic activity	GO:0050896//response to stimulus;GO:0051716//cellular response to stimulus;GO:0023052//signaling;GO:0044763//single-organism cellular process;GO:0007165//signal transduction;GO:0050794//regulation of cellular process;GO:0070271//protein complex biogenesis;GO:0065007//biological regulation;GO:0071840//cellular component organization or biogenesis;GO:0009987//cellular process;GO:0071822//protein co…
ENSG00000102854	1411.67	496	33.5567	14.54	-1.45	0.00310283	0.0313628	down	MSLN	-	-	-	-	-	GO:0005737//cytoplasm;GO:0005615//extracellular space;GO:0005794//Golgi apparatus;GO:0043226//organelle;GO:0005622//intracellular;GO:0071944//cell periphery;GO:0043227//membrane-bounded organelle;GO:0043229//intracellular organelle;GO:0016020//membrane;GO:0005575//cellular_component;GO:0043231//intracellular membrane-bounded organelle;GO:0005623//cell;GO:0044464//cell part;GO:0005886//plasma memb…	GO:0003674//molecular_function	GO:0008150//biological_process;GO:0032502//developmental process;GO:0048856//anatomical structure development;GO:0007155//cell adhesion;GO:0022610//biological adhesion
ENSG00000102879	35.3333	10	1.14333	0.836667	-1.77928	0.00345581	0.0330475	down	CORO1A	coronin, actin binding protein, 1A [Source:HGNC Symbol;Acc:2252]	Cellular Processes;Human Diseases	Infectious diseases;Transport and catabolism	ko04145//Phagosome;ko05152//Tuberculosis	K13882	GO:0044464//cell part;GO:0043234//protein complex;GO:0016023//cytoplasmic, membrane-bounded vesicle;GO:0097708//intracellular vesicle;GO:0016020//membrane;GO:0043231//intracellular membrane-bounded organelle;GO:0005886//plasma membrane;GO:0031410//cytoplasmic vesicle;GO:0005575//cellular_component;GO:0044444//cytoplasmic part;GO:0005623//cell;GO:0031988//membrane-bounded vesicle;GO:0005622//intra…	GO:0005488//binding;GO:0003674//molecular_function;GO:0005515//protein binding;GO:0008092//cytoskeletal protein binding	GO:0044085//cellular component biogenesis;GO:0002376//immune system process;GO:0051674//localization of cell;GO:0022610//biological adhesion;GO:0007155//cell adhesion;GO:0006928//movement of cell or subcellular component;GO:0022607//cellular component assembly;GO:0048870//cell motility;GO:0044699//single-organism process;GO:0016192//vesicle-mediated transport;GO:0042592//homeostatic process;GO:00…
ENSG00000102898	9413.67	4018.67	414.98	228.763	-1.18717	0.00546163	0.0435746	down	NUTF2	nuclear transport factor 2 [Source:HGNC Symbol;Acc:13722]	-	-	-	-	GO:0043231//intracellular membrane-bounded organelle;GO:0031967//organelle envelope;GO:0005737//cytoplasm;GO:0044446//intracellular organelle part;GO:0005575//cellular_component;GO:0043229//intracellular organelle;GO:0012505//endomembrane system;GO:0005829//cytosol;GO:0044444//cytoplasmic part;GO:0005634//nucleus;GO:0044428//nuclear part;GO:0043232//intracellular non-membrane-bounded organelle;GO…	GO:0003674//molecular_function	GO:0046907//intracellular transport;GO:0051641//cellular localization;GO:0008150//biological_process;GO:0051649//establishment of localization in cell;GO:0051179//localization;GO:0051169//nuclear transport;GO:0006913//nucleocytoplasmic transport;GO:0006810//transport;GO:0051234//establishment of localization
ENSG00000102977	2974.67	1059.67	85.0667	42.4567	-1.43526	0.00215199	0.0254317	down	ACD	-	-	-	-	-	GO:0031974//membrane-enclosed lumen;GO:0005634//nucleus;GO:0070013//intracellular organelle lumen;GO:0044424//intracellular part;GO:0005623//cell;GO:0043231//intracellular membrane-bounded organelle;GO:0043232//intracellular non-membrane-bounded organelle;GO:0044464//cell part;GO:0005575//cellular_component;GO:0044446//intracellular organelle part;GO:0031981//nuclear lumen;GO:0044422//organelle p…	GO:0019899//enzyme binding;GO:0003677//DNA binding;GO:0003676//nucleic acid binding;GO:0003674//molecular_function;GO:1901363//heterocyclic compound binding;GO:0005488//binding;GO:0097159//organic cyclic compound binding;GO:0005515//protein binding	GO:0043170//macromolecule metabolic process;GO:0034641//cellular nitrogen compound metabolic process;GO:0032502//developmental process;GO:0044260//cellular macromolecule metabolic process;GO:0071704//organic substance metabolic process;GO:0044699//single-organism process;GO:0050896//response to stimulus;GO:0065008//regulation of biological quality;GO:0006996//organelle organization;GO:0006950//re…
ENSG00000102981	181	64.6667	8.11667	3.84	-1.4428	0.00513693	0.042189	down	PARD6A	par-6 family cell polarity regulator alpha [Source:HGNC Symbol;Acc:15943]	Cellular Processes;Environmental Information Processing	Cellular commiunity;Signal transduction;Transport and catabolism	ko04144//Endocytosis;ko04015//Rap1 signaling pathway;ko04390//Hippo signaling pathway;ko04530//Tight junction	K06093	GO:0005886//plasma membrane;GO:0005737//cytoplasm;GO:0005634//nucleus;GO:0043234//protein complex;GO:0005623//cell;GO:0005622//intracellular;GO:0071944//cell periphery;GO:0043227//membrane-bounded organelle;GO:0043231//intracellular membrane-bounded organelle;GO:0016020//membrane;GO:0005575//cellular_component;GO:0044444//cytoplasmic part;GO:0044464//cell part;GO:0043229//intracellular organelle;…	GO:0005515//protein binding;GO:0003674//molecular_function;GO:0005488//binding;GO:0008134//transcription factor binding;GO:0019899//enzyme binding	GO:0044699//single-organism process;GO:0034330//cell junction organization;GO:0050794//regulation of cellular process;GO:0051301//cell division;GO:0044403//symbiosis, encompassing mutualism through parasitism;GO:0023052//signaling;GO:0051704//multi-organism process;GO:0044419//interspecies interaction between organisms;GO:0007165//signal transduction;GO:0044085//cellular component biogenesis;GO:0…
ENSG00000103024	835.667	183.667	51.1333	16.1133	-2.11038	0.000384815	0.00957697	down	NME3	NME/NM23 nucleoside diphosphate kinase 3 [Source:HGNC Symbol;Acc:7851]	Metabolism	Nucleotide metabolism	ko00230//Purine metabolism;ko00240//Pyrimidine metabolism	K00940	GO:0043226//organelle;GO:0044444//cytoplasmic part;GO:0005623//cell;GO:0044464//cell part;GO:0043229//intracellular organelle;GO:0044424//intracellular part;GO:0043227//membrane-bounded organelle;GO:0043231//intracellular membrane-bounded organelle;GO:0005622//intracellular;GO:0005739//mitochondrion;GO:0005737//cytoplasm;GO:0005575//cellular_component	GO:0005488//binding;GO:0043167//ion binding;GO:0016740//transferase activity;GO:0003824//catalytic activity;GO:0003674//molecular_function;GO:0016772//transferase activity, transferring phosphorus-containing groups;GO:0016301//kinase activity	GO:0009058//biosynthetic process;GO:0044710//single-organism metabolic process;GO:0009987//cellular process;GO:0034641//cellular nitrogen compound metabolic process;GO:0044281//small molecule metabolic process;GO:0008152//metabolic process;GO:0008219//cell death;GO:0044699//single-organism process;GO:0006807//nitrogen compound metabolic process;GO:0044763//single-organism cellular process;GO:0008…
ENSG00000103066	1950.33	820.333	35.2233	21.9	-1.19735	0.00657845	0.0486407	down	PLA2G15	phospholipase A2, group XV [Source:HGNC Symbol;Acc:17163]	Cellular Processes;Metabolism	Transport and catabolism;Lipid metabolism	ko04142//Lysosome;ko00564//Glycerophospholipid metabolism	K06129	GO:0043227//membrane-bounded organelle;GO:0005622//intracellular;GO:0005575//cellular_component;GO:0005773//vacuole;GO:0043226//organelle;GO:0043231//intracellular membrane-bounded organelle;GO:0005739//mitochondrion;GO:0005576//extracellular region;GO:0005737//cytoplasm;GO:0005764//lysosome;GO:0000323//lytic vacuole;GO:0044424//intracellular part;GO:0044464//cell part;GO:0005623//cell;GO:0044444…	GO:0008289//lipid binding;GO:0016746//transferase activity, transferring acyl groups;GO:0003674//molecular_function;GO:0043167//ion binding;GO:0003824//catalytic activity;GO:0005488//binding;GO:0016740//transferase activity	GO:0008150//biological_process;GO:0006807//nitrogen compound metabolic process;GO:0034641//cellular nitrogen compound metabolic process;GO:0071704//organic substance metabolic process;GO:0044699//single-organism process;GO:0006629//lipid metabolic process;GO:0044238//primary metabolic process;GO:0008152//metabolic process;GO:0044710//single-organism metabolic process;GO:0044237//cellular metaboli…
ENSG00000103121	1550.86	616.383	191.61	113.577	-1.29305	0.00217916	0.0257024	down	CMC2	-	-	-	-	-	GO:0044424//intracellular part;GO:0043229//intracellular organelle;GO:0005623//cell;GO:0043231//intracellular membrane-bounded organelle;GO:0005622//intracellular;GO:0005739//mitochondrion;GO:0005575//cellular_component;GO:0005737//cytoplasm;GO:0043226//organelle;GO:0044444//cytoplasmic part;GO:0044464//cell part;GO:0043227//membrane-bounded organelle	-	-
ENSG00000103145	1675	381	142.547	42.2767	-2.07391	0.000254027	0.00791956	down	HCFC1R1	host cell factor C1 regulator 1 (XPO1 dependent) [Source:HGNC Symbol;Acc:21198]	-	-	-	-	GO:0044424//intracellular part;GO:0005737//cytoplasm;GO:0043231//intracellular membrane-bounded organelle;GO:0044464//cell part;GO:0005623//cell;GO:0005622//intracellular;GO:0005634//nucleus;GO:0043229//intracellular organelle;GO:0043227//membrane-bounded organelle;GO:0043226//organelle;GO:0005575//cellular_component	-	-
ENSG00000103152	4822.09	1440.39	223.26	92.3967	-1.67989	0.00170364	0.0222075	down	MPG	N-methylpurine-DNA glycosylase [Source:HGNC Symbol;Acc:7211]	Genetic Information Processing	Replication and repair	ko03410//Base excision repair	K03652	GO:0043226//organelle;GO:0043233//organelle lumen;GO:0044464//cell part;GO:0005654//nucleoplasm;GO:0044424//intracellular part;GO:0044446//intracellular organelle part;GO:0044428//nuclear part;GO:0005634//nucleus;GO:0005575//cellular_component;GO:0031974//membrane-enclosed lumen;GO:0031981//nuclear lumen;GO:0005623//cell;GO:0070013//intracellular organelle lumen;GO:0044422//organelle part;GO:0005…	GO:0003676//nucleic acid binding;GO:0016787//hydrolase activity;GO:0003677//DNA binding;GO:0097159//organic cyclic compound binding;GO:0016798//hydrolase activity, acting on glycosyl bonds;GO:0005488//binding;GO:0003824//catalytic activity;GO:0003674//molecular_function;GO:1901363//heterocyclic compound binding	GO:0006807//nitrogen compound metabolic process;GO:0090304//nucleic acid metabolic process;GO:0006950//response to stress;GO:0046483//heterocycle metabolic process;GO:0034641//cellular nitrogen compound metabolic process;GO:0044260//cellular macromolecule metabolic process;GO:0006725//cellular aromatic compound metabolic process;GO:0050896//response to stimulus;GO:0006259//DNA metabolic process;G…
ENSG00000103187	20176.7	8336.33	598.683	313.21	-1.23017	0.00310081	0.03136	down	COTL1	coactosin-like 1 (Dictyostelium) [Source:HGNC Symbol;Acc:18304]	-	-	-	-	GO:0005856//cytoskeleton;GO:0044422//organelle part;GO:0005634//nucleus;GO:0031967//organelle envelope;GO:0044428//nuclear part;GO:0044424//intracellular part;GO:0005737//cytoplasm;GO:0043227//membrane-bounded organelle;GO:0043232//intracellular non-membrane-bounded organelle;GO:0005635//nuclear envelope;GO:0043231//intracellular membrane-bounded organelle;GO:0043229//intracellular organelle;GO:0…	GO:0019899//enzyme binding;GO:0003674//molecular_function;GO:0005488//binding;GO:0008092//cytoskeletal protein binding;GO:0005515//protein binding	GO:0050896//response to stimulus;GO:0006950//response to stress;GO:0008150//biological_process
ENSG00000103245	1122.33	419.397	26.1	14.93	-1.36365	0.00519132	0.0423599	down	NARFL	-	-	-	-	-	GO:0005575//cellular_component;GO:0005622//intracellular;GO:0032991//macromolecular complex;GO:0005737//cytoplasm;GO:0044464//cell part;GO:0005829//cytosol;GO:0005623//cell;GO:0044424//intracellular part;GO:0043234//protein complex;GO:0044444//cytoplasmic part	GO:0005488//binding;GO:0043167//ion binding;GO:0003674//molecular_function	GO:0065008//regulation of biological quality;GO:0071840//cellular component organization or biogenesis;GO:0044085//cellular component biogenesis;GO:0016043//cellular component organization;GO:0044710//single-organism metabolic process;GO:0008150//biological_process;GO:0044699//single-organism process;GO:0050896//response to stimulus;GO:0006950//response to stress;GO:0042592//homeostatic process;G…
ENSG00000103254	1326.67	186.667	80.6633	15.28	-2.74511	7.10393e-05	0.00403003	down	FAM173A	-	-	-	-	-	GO:0005575//cellular_component	-	-
ENSG00000103260	2039.67	386.333	85.1667	23.84	-2.30634	0.00041359	0.00997746	down	METRN	meteorin, glial cell differentiation regulator [Source:HGNC Symbol;Acc:14151]	-	-	-	-	GO:0005576//extracellular region;GO:0044421//extracellular region part;GO:0005575//cellular_component;GO:0005615//extracellular space	-	GO:0030154//cell differentiation;GO:0032502//developmental process;GO:0048856//anatomical structure development;GO:0044763//single-organism cellular process;GO:0048869//cellular developmental process;GO:0044767//single-organism developmental process;GO:0008150//biological_process;GO:0044699//single-organism process;GO:0009987//cellular process
ENSG00000103266	4565.78	1267.02	172.867	69.73	-1.78499	0.000829877	0.0145635	down	STUB1	-	Genetic Information Processing	Folding, sorting and degradation	ko04141//Protein processing in endoplasmic reticulum;ko04120//Ubiquitin mediated proteolysis	K09561	GO:0043226//organelle;GO:0005737//cytoplasm;GO:0005829//cytosol;GO:0005575//cellular_component;GO:0044444//cytoplasmic part;GO:0044424//intracellular part;GO:0005634//nucleus;GO:0032991//macromolecular complex;GO:0043227//membrane-bounded organelle;GO:0005623//cell;GO:0043231//intracellular membrane-bounded organelle;GO:0044464//cell part;GO:0043234//protein complex;GO:0005622//intracellular;GO:0…	GO:0060090//binding, bridging;GO:0019899//enzyme binding;GO:0003824//catalytic activity;GO:0016874//ligase activity;GO:0030674//protein binding, bridging;GO:0005488//binding;GO:0003674//molecular_function;GO:0005515//protein binding	GO:0043170//macromolecule metabolic process;GO:0050789//regulation of biological process;GO:0036211//protein modification process;GO:0051604//protein maturation;GO:0051716//cellular response to stimulus;GO:0044237//cellular metabolic process;GO:0006139//nucleobase-containing compound metabolic process;GO:0065007//biological regulation;GO:0044260//cellular macromolecule metabolic process;GO:009030…
ENSG00000103363	5009	739.333	456.407	109.54	-2.68673	6.22627e-05	0.00378027	down	TCEB2	transcription elongation factor B (SIII), polypeptide 2 (18kDa, elongin B) [Source:HGNC Symbol;Acc:11619]	Genetic Information Processing;Environmental Information Processing;Human Diseases	Signal transduction;Folding, sorting and degradation;Cancers	ko05200//Pathways in cancer;ko04120//Ubiquitin mediated proteolysis;ko04066//HIF-1 signaling pathway;ko05211//Renal cell carcinoma	K03873	GO:0031974//membrane-enclosed lumen;GO:0044446//intracellular organelle part;GO:0005634//nucleus;GO:0005622//intracellular;GO:0005737//cytoplasm;GO:0032991//macromolecular complex;GO:0043234//protein complex;GO:0005623//cell;GO:0044428//nuclear part;GO:0043226//organelle;GO:0044422//organelle part;GO:0044424//intracellular part;GO:0043231//intracellular membrane-bounded organelle;GO:0044464//cell…	GO:0008135//translation factor activity, RNA binding;GO:0003723//RNA binding;GO:0003674//molecular_function;GO:0097159//organic cyclic compound binding;GO:0005488//binding;GO:1901363//heterocyclic compound binding;GO:0003676//nucleic acid binding;GO:0005515//protein binding;GO:0019899//enzyme binding	GO:0043412//macromolecule modification;GO:0022607//cellular component assembly;GO:0065003//macromolecular complex assembly;GO:0008152//metabolic process;GO:0070271//protein complex biogenesis;GO:0034641//cellular nitrogen compound metabolic process;GO:0009058//biosynthetic process;GO:0016043//cellular component organization;GO:0006464//cellular protein modification process;GO:0043170//macromolecu…
ENSG00000103415	2019	725.667	88.1267	44.43	-1.4299	0.00147984	0.0203147	down	HMOX2	heme oxygenase (decycling) 2 [Source:HGNC Symbol;Acc:5014]	Organismal Systems;Metabolism	Metabolism of cofactors and vitamins;Digestive system	ko04978//Mineral absorption;ko00860//Porphyrin and chlorophyll metabolism	K00510	GO:0005783//endoplasmic reticulum;GO:0071944//cell periphery;GO:0012505//endomembrane system;GO:0005575//cellular_component;GO:0005623//cell;GO:0043227//membrane-bounded organelle;GO:0005737//cytoplasm;GO:0005622//intracellular;GO:0016020//membrane;GO:0044464//cell part;GO:0043226//organelle;GO:0044444//cytoplasmic part;GO:0005886//plasma membrane;GO:0043229//intracellular organelle;GO:0043231//i…	GO:0003824//catalytic activity;GO:0016491//oxidoreductase activity;GO:0003674//molecular_function;GO:0043167//ion binding;GO:0005488//binding	GO:0050896//response to stimulus;GO:0034641//cellular nitrogen compound metabolic process;GO:0006950//response to stress;GO:0006807//nitrogen compound metabolic process;GO:0044699//single-organism process;GO:0051234//establishment of localization;GO:0055085//transmembrane transport;GO:0051179//localization;GO:0065007//biological regulation;GO:0009056//catabolic process;GO:0044237//cellular metabo…
ENSG00000103494	152.333	339	2.12	4.71667	1.18655	0.00634596	0.047406	up	RPGRIP1L	RPGRIP1-like [Source:HGNC Symbol;Acc:29168]	-	-	-	-	GO:0005575//cellular_component;GO:0005737//cytoplasm;GO:0044464//cell part;GO:0005623//cell;GO:0042995//cell projection;GO:0005856//cytoskeleton;GO:0043232//intracellular non-membrane-bounded organelle;GO:0044422//organelle part;GO:0043229//intracellular organelle;GO:0043226//organelle;GO:0005929//cilium;GO:0044430//cytoskeletal part;GO:0015630//microtubule cytoskeleton;GO:0044424//intracellular …	GO:0003674//molecular_function	GO:0044085//cellular component biogenesis;GO:0009987//cellular process;GO:0000902//cell morphogenesis;GO:0044763//single-organism cellular process;GO:0032989//cellular component morphogenesis;GO:0009653//anatomical structure morphogenesis;GO:0009790//embryo development;GO:0048646//anatomical structure formation involved in morphogenesis;GO:0016043//cellular component organization;GO:0032502//deve…
ENSG00000103995	313.667	869.333	2.87	9.05	1.50305	0.000783062	0.0141397	up	CEP152	-	-	-	-	-	GO:0043229//intracellular organelle;GO:0044430//cytoskeletal part;GO:0044422//organelle part;GO:0005829//cytosol;GO:0043231//intracellular membrane-bounded organelle;GO:0015630//microtubule cytoskeleton;GO:0005737//cytoplasm;GO:0005622//intracellular;GO:0044464//cell part;GO:0005623//cell;GO:0043226//organelle;GO:0043227//membrane-bounded organelle;GO:0044446//intracellular organelle part;GO:0044…	GO:0005515//protein binding;GO:0005488//binding;GO:0019899//enzyme binding;GO:0003674//molecular_function	GO:0009987//cellular process;GO:0071840//cellular component organization or biogenesis;GO:0006996//organelle organization;GO:0044763//single-organism cellular process;GO:0044699//single-organism process;GO:0007010//cytoskeleton organization;GO:0007049//cell cycle;GO:0008150//biological_process;GO:0016043//cellular component organization
ENSG00000104133	426.333	1055.67	6.77667	10.06	1.33463	0.00178772	0.0227783	up	SPG11	-	-	-	-	-	GO:0005730//nucleolus;GO:0005773//vacuole;GO:0044464//cell part;GO:0043227//membrane-bounded organelle;GO:0005737//cytoplasm;GO:0070013//intracellular organelle lumen;GO:0005886//plasma membrane;GO:0000323//lytic vacuole;GO:0044422//organelle part;GO:0005764//lysosome;GO:0043233//organelle lumen;GO:0031981//nuclear lumen;GO:0044446//intracellular organelle part;GO:0043229//intracellular organelle…	GO:0003674//molecular_function	GO:0044763//single-organism cellular process;GO:0008150//biological_process;GO:0009987//cellular process;GO:0044699//single-organism process;GO:0008219//cell death
ENSG00000104140	169	56.6667	5.02333	2.28667	-1.50538	0.00564597	0.0444528	down	RHOV	ras homolog family member V [Source:HGNC Symbol;Acc:18313]	-	-	-	-	GO:0005829//cytosol;GO:0044444//cytoplasmic part;GO:0044464//cell part;GO:0005886//plasma membrane;GO:0043226//organelle;GO:0005768//endosome;GO:0043229//intracellular organelle;GO:0005623//cell;GO:0043231//intracellular membrane-bounded organelle;GO:0005622//intracellular;GO:0012505//endomembrane system;GO:0005737//cytoplasm;GO:0044424//intracellular part;GO:0005773//vacuole;GO:0043227//membrane…	GO:0003674//molecular_function;GO:0043167//ion binding;GO:0005488//binding	GO:0006807//nitrogen compound metabolic process;GO:0065007//biological regulation;GO:0050896//response to stimulus;GO:0046483//heterocycle metabolic process;GO:0051716//cellular response to stimulus;GO:0009987//cellular process;GO:0009056//catabolic process;GO:0007165//signal transduction;GO:1901360//organic cyclic compound metabolic process;GO:0071704//organic substance metabolic process;GO:0044…
ENSG00000104321	0	8.13667	0.001	0.463333	6.02402	2.28662e-05	0.00199864	up	TRPA1	transient receptor potential cation channel, subfamily A, member 1 [Source:HGNC Symbol;Acc:497]	Organismal Systems	Sensory system	ko04750//Inflammatory mediator regulation of TRP channels	K04984	GO:0044464//cell part;GO:0005623//cell;GO:0005622//intracellular;GO:0043226//organelle;GO:0005575//cellular_component;GO:0071944//cell periphery;GO:0005886//plasma membrane;GO:0016020//membrane	GO:0005215//transporter activity;GO:0003674//molecular_function;GO:0022857//transmembrane transporter activity	GO:0050896//response to stimulus;GO:0051234//establishment of localization;GO:0050877//neurological system process;GO:0008150//biological_process;GO:0032501//multicellular organismal process;GO:0003008//system process;GO:0006810//transport;GO:0006950//response to stress;GO:0055085//transmembrane transport;GO:0051179//localization
ENSG00000104419	2632.67	17069	69.1167	599.737	2.71691	9.07772e-13	9.66136e-10	up	NDRG1	-	-	-	-	-	GO:0043234//protein complex;GO:0044422//organelle part;GO:0005622//intracellular;GO:0005856//cytoskeleton;GO:0005815//microtubule organizing center;GO:0043231//intracellular membrane-bounded organelle;GO:0044430//cytoskeletal part;GO:0043226//organelle;GO:0043232//intracellular non-membrane-bounded organelle;GO:0044444//cytoplasmic part;GO:0015630//microtubule cytoskeleton;GO:0005737//cytoplasm;G…	GO:0005488//binding;GO:0005515//protein binding;GO:0008092//cytoskeletal protein binding;GO:0019899//enzyme binding;GO:0003674//molecular_function	GO:0050789//regulation of biological process;GO:0007165//signal transduction;GO:0002376//immune system process;GO:0003008//system process;GO:0006950//response to stress;GO:0010256//endomembrane system organization;GO:0050877//neurological system process;GO:0008150//biological_process;GO:0044767//single-organism developmental process;GO:0032501//multicellular organismal process;GO:0048856//anatomi…
ENSG00000104518	3387	1059.67	114.98	42.35	-1.61317	0.00279502	0.0294871	down	GSDMD	-	-	-	-	-	-	-	GO:0008150//biological_process
ENSG00000104524	914.333	236	16.84	7.4	-1.89412	0.000241417	0.00775835	down	PYCRL	-	Metabolism	Amino acid metabolism;Global and Overview	ko01230//Biosynthesis of amino acids;ko00330//Arginine and proline metabolism	K00286	-	GO:0016491//oxidoreductase activity;GO:0003824//catalytic activity;GO:0003674//molecular_function	GO:0044710//single-organism metabolic process;GO:0044699//single-organism process;GO:0006807//nitrogen compound metabolic process;GO:0006082//organic acid metabolic process;GO:0071704//organic substance metabolic process;GO:0044238//primary metabolic process;GO:0006520//cellular amino acid metabolic process;GO:0044763//single-organism cellular process;GO:0044237//cellular metabolic process;GO:000…
ENSG00000104529	16566	4471	1013.69	344.97	-1.82101	0.000824342	0.0145227	down	EEF1D	-	Human Diseases	Infectious diseases	ko05168//Herpes simplex infection	K15410	GO:0044464//cell part;GO:0044424//intracellular part;GO:0005737//cytoplasm;GO:0005622//intracellular;GO:0005623//cell;GO:0043229//intracellular organelle;GO:0043226//organelle;GO:0043227//membrane-bounded organelle;GO:0005829//cytosol;GO:0005634//nucleus;GO:0044444//cytoplasmic part;GO:0043234//protein complex;GO:0043231//intracellular membrane-bounded organelle;GO:0032991//macromolecular complex…	GO:0008135//translation factor activity, RNA binding;GO:0005488//binding;GO:0003723//RNA binding;GO:1901363//heterocyclic compound binding;GO:0003677//DNA binding;GO:0003674//molecular_function;GO:0003676//nucleic acid binding;GO:0097159//organic cyclic compound binding;GO:0004871//signal transducer activity	GO:0050789//regulation of biological process;GO:0044249//cellular biosynthetic process;GO:0010467//gene expression;GO:0007154//cell communication;GO:0044267//cellular protein metabolic process;GO:0044699//single-organism process;GO:0034645//cellular macromolecule biosynthetic process;GO:0019538//protein metabolic process;GO:0043604//amide biosynthetic process;GO:0043603//cellular amide metabolic …
ENSG00000104679	1300	477	43.4867	23.4567	-1.38994	0.00262947	0.0285524	down	R3HCC1	R3H domain and coiled-coil containing 1 [Source:HGNC Symbol;Acc:27329]	-	-	-	-	-	GO:0003674//molecular_function	-
ENSG00000104731	854.37	335.777	23.7833	15.0133	-1.28921	0.00549745	0.0437018	down	KLHDC4	-	-	-	-	-	-	GO:0003674//molecular_function	-
ENSG00000104756	1013.33	2351	18.56	55.8667	1.23124	0.00453764	0.0389912	up	KCTD9	-	-	-	-	-	-	GO:0003674//molecular_function	GO:0070271//protein complex biogenesis;GO:0071822//protein complex subunit organization;GO:0008150//biological_process;GO:0006461//protein complex assembly;GO:0022607//cellular component assembly;GO:0071840//cellular component organization or biogenesis;GO:0043933//macromolecular complex subunit organization;GO:0016043//cellular component organization;GO:0009987//cellular process;GO:0065003//macr…
ENSG00000104765	1834.67	8001.7	32.9767	172.35	2.14968	1.89582e-08	5.91396e-06	up	BNIP3L	BCL2/adenovirus E1B 19kDa interacting protein 3-like [Source:HGNC Symbol;Acc:1085]	-	-	-	-	GO:0044428//nuclear part;GO:0005575//cellular_component;GO:0044422//organelle part;GO:0043227//membrane-bounded organelle;GO:0044446//intracellular organelle part;GO:0044444//cytoplasmic part;GO:0005737//cytoplasm;GO:0005783//endoplasmic reticulum;GO:0043229//intracellular organelle;GO:0031967//organelle envelope;GO:0005622//intracellular;GO:0044464//cell part;GO:0031975//envelope;GO:0005739//mit…	GO:0003674//molecular_function	GO:0044763//single-organism cellular process;GO:0009987//cellular process;GO:0006996//organelle organization;GO:0002376//immune system process;GO:0051704//multi-organism process;GO:0044419//interspecies interaction between organisms;GO:0007005//mitochondrion organization;GO:0009056//catabolic process;GO:0044699//single-organism process;GO:0008219//cell death;GO:0071840//cellular component organiz…
ENSG00000104812	865	2257.33	12.8867	45.1967	1.41973	8.10704e-05	0.00426498	up	GYS1	glycogen synthase 1 (muscle) [Source:HGNC Symbol;Acc:4706]	Organismal Systems;Environmental Information Processing;Metabolism;Human Diseases	Endocrine and metabolic diseases;Signal transduction;Carbohydrate metabolism;Endocrine system	ko04151//PI3K-Akt signaling pathway;ko04910//Insulin signaling pathway;ko04152//AMPK signaling pathway;ko04931//Insulin resistance;ko04922//Glucagon signaling pathway;ko00500//Starch and sucrose metabolism	K00693	GO:0005737//cytoplasm;GO:0044424//intracellular part;GO:0044444//cytoplasmic part;GO:0044464//cell part;GO:0005829//cytosol;GO:0005622//intracellular;GO:0005623//cell;GO:0005575//cellular_component	GO:0016740//transferase activity;GO:0005488//binding;GO:0005515//protein binding;GO:0016757//transferase activity, transferring glycosyl groups;GO:0003674//molecular_function;GO:0003824//catalytic activity;GO:0019899//enzyme binding	GO:0006091//generation of precursor metabolites and energy;GO:0044281//small molecule metabolic process;GO:0044237//cellular metabolic process;GO:0044710//single-organism metabolic process;GO:0044238//primary metabolic process;GO:0008152//metabolic process;GO:0005975//carbohydrate metabolic process;GO:0048856//anatomical structure development;GO:0009987//cellular process;GO:0008150//biological_pr…
ENSG00000104823	2023.08	684.54	86.9133	53.5333	-1.50909	0.00167114	0.0219578	down	ECH1	-	Cellular Processes	Transport and catabolism	ko04146//Peroxisome	K12663	GO:0005739//mitochondrion;GO:0005777//peroxisome;GO:0043229//intracellular organelle;GO:0044444//cytoplasmic part;GO:0005575//cellular_component;GO:0043226//organelle;GO:0044424//intracellular part;GO:0044464//cell part;GO:0042579//microbody;GO:0005737//cytoplasm;GO:0043231//intracellular membrane-bounded organelle;GO:0005623//cell;GO:0043227//membrane-bounded organelle;GO:0005622//intracellular	GO:0003824//catalytic activity;GO:0003674//molecular_function;GO:0016853//isomerase activity	GO:0006629//lipid metabolic process;GO:0071704//organic substance metabolic process;GO:0044699//single-organism process;GO:0009056//catabolic process;GO:0008150//biological_process;GO:0044238//primary metabolic process;GO:0044710//single-organism metabolic process;GO:0008152//metabolic process;GO:0044281//small molecule metabolic process
ENSG00000104825	1357.59	415.333	45.6767	18.44	-1.66293	0.000141298	0.00575791	down	NFKBIB	-	Organismal Systems;Human Diseases	Nervous system;Immune system;Infectious diseases;Endocrine system	ko05168//Herpes simplex infection;ko05169//Epstein-Barr virus infection;ko05164//Influenza A;ko05145//Toxoplasmosis;ko04062//Chemokine signaling pathway;ko05162//Measles;ko05140//Leishmaniasis;ko04722//Neurotrophin signaling pathway;ko04660//T cell receptor signaling pathway;ko04662//B cell receptor signaling pathway;ko04920//Adipocytokine signaling pathway;ko04622//RIG-I-like receptor signaling …	K02581	GO:0043226//organelle;GO:0044424//intracellular part;GO:0043227//membrane-bounded organelle;GO:0005575//cellular_component;GO:0043229//intracellular organelle;GO:0005829//cytosol;GO:0005737//cytoplasm;GO:0043231//intracellular membrane-bounded organelle;GO:0005622//intracellular;GO:0005623//cell;GO:0005634//nucleus;GO:0044464//cell part;GO:0044444//cytoplasmic part	GO:0004871//signal transducer activity;GO:0003674//molecular_function;GO:0000988//transcription factor activity, protein binding	GO:0008152//metabolic process;GO:0002376//immune system process;GO:0050789//regulation of biological process;GO:0009987//cellular process;GO:0006950//response to stress;GO:0044763//single-organism cellular process;GO:0051716//cellular response to stimulus;GO:0007165//signal transduction;GO:0050896//response to stimulus;GO:0044699//single-organism process;GO:0009058//biosynthetic process;GO:000715…
ENSG00000104852	8757.33	2902.33	257.413	100.35	-1.53626	0.0012569	0.0185752	down	SNRNP70	small nuclear ribonucleoprotein 70kDa (U1) [Source:HGNC Symbol;Acc:11150]	Genetic Information Processing	Transcription	ko03040//Spliceosome	K11093	GO:0005654//nucleoplasm;GO:0043226//organelle;GO:0044464//cell part;GO:0044446//intracellular organelle part;GO:0043231//intracellular membrane-bounded organelle;GO:0044422//organelle part;GO:0005622//intracellular;GO:0031981//nuclear lumen;GO:0005623//cell;GO:0005575//cellular_component;GO:0043229//intracellular organelle;GO:0031974//membrane-enclosed lumen;GO:0043227//membrane-bounded organelle…	GO:0005488//binding;GO:0097159//organic cyclic compound binding;GO:1901363//heterocyclic compound binding;GO:0003676//nucleic acid binding;GO:0003674//molecular_function;GO:0003723//RNA binding	GO:0046483//heterocycle metabolic process;GO:1901360//organic cyclic compound metabolic process;GO:0044238//primary metabolic process;GO:0044237//cellular metabolic process;GO:0044260//cellular macromolecule metabolic process;GO:0071704//organic substance metabolic process;GO:0008152//metabolic process;GO:0016071//mRNA metabolic process;GO:0008150//biological_process;GO:0090304//nucleic acid meta…
ENSG00000104856	866	308.333	20.1433	8.76	-1.43742	0.00266292	0.0287122	down	RELB	-	Organismal Systems;Environmental Information Processing;Human Diseases	Signal transduction;Development;Infectious diseases	ko05166//HTLV-I infection;ko05169//Epstein-Barr virus infection;ko04010//MAPK signaling pathway;ko04380//Osteoclast differentiation;ko04064//NF-kappa B signaling pathway	K09253	GO:0005856//cytoskeleton;GO:0044446//intracellular organelle part;GO:0044424//intracellular part;GO:0005737//cytoplasm;GO:0015630//microtubule cytoskeleton;GO:0044464//cell part;GO:0043229//intracellular organelle;GO:0043226//organelle;GO:0044422//organelle part;GO:0043231//intracellular membrane-bounded organelle;GO:0005622//intracellular;GO:0005634//nucleus;GO:0043232//intracellular non-membran…	GO:0005488//binding;GO:1901363//heterocyclic compound binding;GO:0000988//transcription factor activity, protein binding;GO:0097159//organic cyclic compound binding;GO:0003674//molecular_function;GO:0003677//DNA binding;GO:0001071//nucleic acid binding transcription factor activity;GO:0003676//nucleic acid binding	GO:0048856//anatomical structure development;GO:0048869//cellular developmental process;GO:0044767//single-organism developmental process;GO:0044237//cellular metabolic process;GO:0044699//single-organism process;GO:0002376//immune system process;GO:0008152//metabolic process;GO:0006807//nitrogen compound metabolic process;GO:0008150//biological_process;GO:0044763//single-organism cellular proces…
ENSG00000104872	1429.67	505.333	88.3133	42.05	-1.43827	0.00403108	0.0363038	down	PIH1D1	-	-	-	-	-	GO:0005622//intracellular;GO:0005575//cellular_component;GO:0044464//cell part;GO:0005623//cell	-	GO:0022613//ribonucleoprotein complex biogenesis;GO:0071840//cellular component organization or biogenesis;GO:0065003//macromolecular complex assembly;GO:0044085//cellular component biogenesis;GO:0043933//macromolecular complex subunit organization;GO:0016043//cellular component organization;GO:0071826//ribonucleoprotein complex subunit organization;GO:0008150//biological_process;GO:0022618//ribo…
ENSG00000104883	206.333	45.6667	11.2467	3.50333	-2.10531	0.000453222	0.0105505	down	PEX11G	peroxisomal biogenesis factor 11 gamma [Source:HGNC Symbol;Acc:20208]	Cellular Processes	Transport and catabolism	ko04146//Peroxisome	K13353	GO:0032991//macromolecular complex;GO:0043226//organelle;GO:0005777//peroxisome;GO:0043227//membrane-bounded organelle;GO:0005737//cytoplasm;GO:0043229//intracellular organelle;GO:0005623//cell;GO:0005575//cellular_component;GO:0044444//cytoplasmic part;GO:0044464//cell part;GO:0043231//intracellular membrane-bounded organelle;GO:0044424//intracellular part;GO:0042579//microbody;GO:0043234//prote…	GO:0003674//molecular_function	GO:0008150//biological_process
ENSG00000104886	2608.96	886.397	118.917	54.9	-1.49339	0.00482201	0.0405036	down	PLEKHJ1	-	-	-	-	-	-	-	-
ENSG00000104889	3929.33	1463	196.223	98.0267	-1.37455	0.00321653	0.0318537	down	RNASEH2A	ribonuclease H2, subunit A [Source:HGNC Symbol;Acc:18518]	Genetic Information Processing	Replication and repair	ko03030//DNA replication	K10743	GO:0005634//nucleus;GO:0043229//intracellular organelle;GO:0005623//cell;GO:0032991//macromolecular complex;GO:0005622//intracellular;GO:0044464//cell part;GO:0043231//intracellular membrane-bounded organelle;GO:0043226//organelle;GO:0043227//membrane-bounded organelle;GO:0005575//cellular_component;GO:0043234//protein complex;GO:0044424//intracellular part	GO:0005488//binding;GO:0097159//organic cyclic compound binding;GO:0003676//nucleic acid binding;GO:0003674//molecular_function;GO:0003824//catalytic activity;GO:0016787//hydrolase activity;GO:0004518//nuclease activity;GO:1901363//heterocyclic compound binding;GO:0016788//hydrolase activity, acting on ester bonds;GO:0043167//ion binding;GO:0003723//RNA binding	GO:0034655//nucleobase-containing compound catabolic process;GO:0006259//DNA metabolic process;GO:0044237//cellular metabolic process;GO:1901575//organic substance catabolic process;GO:0046700//heterocycle catabolic process;GO:0009056//catabolic process;GO:0006807//nitrogen compound metabolic process;GO:1901361//organic cyclic compound catabolic process;GO:0043170//macromolecule metabolic process…
ENSG00000104899	2226.67	465.667	60.6367	20.24	-2.17156	0.000281097	0.00841931	down	AMH	anti-Mullerian hormone [Source:HGNC Symbol;Acc:464]	Environmental Information Processing	Signal transduction;Signaling molecules and interaction	ko04060//Cytokine-cytokine receptor interaction;ko04024//cAMP signaling pathway;ko04390//Hippo signaling pathway;ko04350//TGF-beta signaling pathway	K04665	GO:0044421//extracellular region part;GO:0044464//cell part;GO:0005623//cell;GO:0005576//extracellular region;GO:0005622//intracellular;GO:0005737//cytoplasm;GO:0005575//cellular_component;GO:0044424//intracellular part;GO:0005615//extracellular space	GO:0003674//molecular_function	GO:0044700//single organism signaling;GO:0007568//aging;GO:0030154//cell differentiation;GO:0007267//cell-cell signaling;GO:0023052//signaling;GO:0032502//developmental process;GO:0048869//cellular developmental process;GO:0007154//cell communication;GO:0009987//cellular process;GO:0008150//biological_process;GO:0000003//reproduction;GO:0044699//single-organism process;GO:0048856//anatomical stru…
ENSG00000104904	35417.7	9471.12	2976.47	1070.97	-1.84648	0.000262579	0.00806594	down	OAZ1	ornithine decarboxylase antizyme 1 [Source:HGNC Symbol;Acc:8095]	-	-	-	-	GO:0005622//intracellular;GO:0005829//cytosol;GO:0005737//cytoplasm;GO:0005623//cell;GO:0005575//cellular_component;GO:0044464//cell part;GO:0044424//intracellular part;GO:0044444//cytoplasmic part	GO:0030234//enzyme regulator activity;GO:0098772//molecular function regulator;GO:0003674//molecular_function	GO:0009987//cellular process;GO:0044237//cellular metabolic process;GO:0008150//biological_process;GO:0044281//small molecule metabolic process;GO:0006807//nitrogen compound metabolic process;GO:0034641//cellular nitrogen compound metabolic process;GO:0044710//single-organism metabolic process;GO:0044699//single-organism process;GO:0008152//metabolic process;GO:0009058//biosynthetic process
ENSG00000104907	3452	1397.67	84.9033	51.94	-1.25424	0.00524574	0.0425802	down	TRMT1	tRNA methyltransferase 1 homolog (S. cerevisiae) [Source:HGNC Symbol;Acc:25980]	-	-	-	-	-	GO:1901363//heterocyclic compound binding;GO:0003824//catalytic activity;GO:0016741//transferase activity, transferring one-carbon groups;GO:0008168//methyltransferase activity;GO:0097159//organic cyclic compound binding;GO:0003674//molecular_function;GO:0016740//transferase activity;GO:0003723//RNA binding;GO:0005488//binding;GO:0003676//nucleic acid binding;GO:0043167//ion binding	GO:0090304//nucleic acid metabolic process;GO:0044237//cellular metabolic process;GO:0016070//RNA metabolic process;GO:0006139//nucleobase-containing compound metabolic process;GO:0044238//primary metabolic process;GO:0034641//cellular nitrogen compound metabolic process;GO:0008152//metabolic process;GO:0043170//macromolecule metabolic process;GO:0006399//tRNA metabolic process;GO:1901360//organi…
ENSG00000104915	3024.33	1171.33	161.393	84.2367	-1.31329	0.00429092	0.0376599	down	STX10	syntaxin 10 [Source:HGNC Symbol;Acc:11428]	Genetic Information Processing	Folding, sorting and degradation	ko04130//SNARE interactions in vesicular transport	K08498	GO:0044444//cytoplasmic part;GO:0005737//cytoplasm;GO:0012505//endomembrane system;GO:0032991//macromolecular complex;GO:0044424//intracellular part;GO:0043234//protein complex;GO:0043227//membrane-bounded organelle;GO:0005622//intracellular;GO:0044464//cell part;GO:0005575//cellular_component;GO:0043229//intracellular organelle;GO:0005794//Golgi apparatus;GO:0005623//cell;GO:0043226//organelle;G…	GO:0003674//molecular_function	GO:0071840//cellular component organization or biogenesis;GO:0008150//biological_process;GO:0016192//vesicle-mediated transport;GO:0009987//cellular process;GO:0051234//establishment of localization;GO:0061024//membrane organization;GO:0006810//transport;GO:0051179//localization;GO:0016043//cellular component organization
ENSG00000104951	70.3333	23	1.86667	1.04333	-1.55677	0.00443127	0.0383613	down	IL4I1	-	Metabolism	Amino acid metabolism	ko00280//Valine, leucine and isoleucine degradation;ko00380//Tryptophan metabolism;ko00270//Cysteine and methionine metabolism;ko00250//Alanine, aspartate and glutamate metabolism;ko00350//Tyrosine metabolism;ko00360//Phenylalanine metabolism;ko00400//Phenylalanine, tyrosine and tryptophan biosynthesis	K03334	GO:0005773//vacuole;GO:0005737//cytoplasm;GO:0005635//nuclear envelope;GO:0044424//intracellular part;GO:0044428//nuclear part;GO:0044446//intracellular organelle part;GO:0043227//membrane-bounded organelle;GO:0044444//cytoplasmic part;GO:0005623//cell;GO:0031975//envelope;GO:0044422//organelle part;GO:0005764//lysosome;GO:0043229//intracellular organelle;GO:0031967//organelle envelope;GO:0005576…	GO:0003824//catalytic activity;GO:0003674//molecular_function;GO:0016491//oxidoreductase activity;GO:0043167//ion binding;GO:0005488//binding	GO:0008150//biological_process
ENSG00000104960	3271.93	1129.67	110.263	53.7833	-1.47485	0.00403563	0.0363267	down	PTOV1	-	-	-	-	-	GO:0016020//membrane;GO:0043227//membrane-bounded organelle;GO:0043229//intracellular organelle;GO:0005623//cell;GO:0071944//cell periphery;GO:0005575//cellular_component;GO:0005622//intracellular;GO:0005737//cytoplasm;GO:0043231//intracellular membrane-bounded organelle;GO:0005634//nucleus;GO:0005886//plasma membrane;GO:0044424//intracellular part;GO:0044464//cell part;GO:0043226//organelle	-	GO:0008152//metabolic process;GO:0044237//cellular metabolic process;GO:0006807//nitrogen compound metabolic process;GO:0009058//biosynthetic process;GO:0009987//cellular process;GO:0034641//cellular nitrogen compound metabolic process;GO:0008150//biological_process
ENSG00000104964	14015.7	5270.33	544.613	255.177	-1.35819	0.00480539	0.0404014	down	AES	amino-terminal enhancer of split [Source:HGNC Symbol;Acc:307]	-	-	-	-	GO:0043231//intracellular membrane-bounded organelle;GO:0005622//intracellular;GO:0044424//intracellular part;GO:0005623//cell;GO:0044464//cell part;GO:0005634//nucleus;GO:0043229//intracellular organelle;GO:0005575//cellular_component;GO:0043226//organelle;GO:0043227//membrane-bounded organelle	GO:0000988//transcription factor activity, protein binding;GO:0003674//molecular_function	GO:0008152//metabolic process;GO:0048856//anatomical structure development;GO:0006807//nitrogen compound metabolic process;GO:0044699//single-organism process;GO:0044763//single-organism cellular process;GO:0044237//cellular metabolic process;GO:0050896//response to stimulus;GO:0009987//cellular process;GO:0009058//biosynthetic process;GO:0032502//developmental process;GO:0008150//biological_proc…
ENSG00000104969	8333	3486	175.19	98.2267	-1.2073	0.00451905	0.038904	down	SGTA	-	-	-	-	-	GO:0044464//cell part;GO:0044424//intracellular part;GO:0005622//intracellular;GO:0005575//cellular_component;GO:0005623//cell;GO:0005737//cytoplasm	GO:0003674//molecular_function	GO:0044403//symbiosis, encompassing mutualism through parasitism;GO:0051704//multi-organism process;GO:0044419//interspecies interaction between organisms;GO:0008150//biological_process
ENSG00000104979	5027.67	1322.33	397.57	145.003	-1.87087	0.000365718	0.00937388	down	C19orf53	-	-	-	-	-	-	-	-
ENSG00000104980	4251.33	1511.67	147.3	63.9767	-1.44531	0.000688931	0.0132707	down	TIMM44	-	-	-	-	-	GO:0005622//intracellular;GO:0044424//intracellular part;GO:0043226//organelle;GO:0044444//cytoplasmic part;GO:0005575//cellular_component;GO:0044464//cell part;GO:0043229//intracellular organelle;GO:0005737//cytoplasm;GO:0043227//membrane-bounded organelle;GO:0005623//cell;GO:0005739//mitochondrion;GO:0043231//intracellular membrane-bounded organelle	GO:0005215//transporter activity;GO:0003674//molecular_function;GO:0043167//ion binding;GO:0022892//substrate-specific transporter activity;GO:0008565//protein transporter activity;GO:0022857//transmembrane transporter activity;GO:0005488//binding	GO:0071840//cellular component organization or biogenesis;GO:0007005//mitochondrion organization;GO:0071702//organic substance transport;GO:0045184//establishment of protein localization;GO:0006810//transport;GO:0006996//organelle organization;GO:0008104//protein localization;GO:0033036//macromolecule localization;GO:0046907//intracellular transport;GO:0051234//establishment of localization;GO:00…
ENSG00000105048	1258.33	400.333	88.7967	36.4367	-1.58712	0.00348902	0.0332173	down	TNNT1	-	-	-	-	-	GO:0044424//intracellular part;GO:0043228//non-membrane-bounded organelle;GO:0044444//cytoplasmic part;GO:0043226//organelle;GO:0005829//cytosol;GO:0005856//cytoskeleton;GO:0044464//cell part;GO:0005737//cytoplasm;GO:0043234//protein complex;GO:0005575//cellular_component;GO:0032991//macromolecular complex;GO:0043229//intracellular organelle;GO:0043232//intracellular non-membrane-bounded organell…	GO:0008092//cytoskeletal protein binding;GO:0003674//molecular_function;GO:0005515//protein binding;GO:0005488//binding	GO:0008150//biological_process
ENSG00000105173	289	131	10.95	5.32333	-1.11152	0.00421284	0.0372182	down	CCNE1	cyclin E1 [Source:HGNC Symbol;Acc:1589]	Cellular Processes;Environmental Information Processing;Human Diseases	Cell growth and death;Signal transduction;Infectious diseases;Cancers	ko05203//Viral carcinogenesis;ko05200//Pathways in cancer;ko04151//PI3K-Akt signaling pathway;ko05162//Measles;ko05161//Hepatitis B;ko05206//MicroRNAs in cancer;ko04110//Cell cycle;ko04114//Oocyte meiosis;ko05222//Small cell lung cancer;ko05215//Prostate cancer;ko04115//p53 signaling pathway	K06626	GO:0070013//intracellular organelle lumen;GO:0005623//cell;GO:0005575//cellular_component;GO:0043233//organelle lumen;GO:0031974//membrane-enclosed lumen;GO:0005622//intracellular;GO:0043229//intracellular organelle;GO:0005634//nucleus;GO:0043234//protein complex;GO:0044446//intracellular organelle part;GO:0044424//intracellular part;GO:0005654//nucleoplasm;GO:0005737//cytoplasm;GO:0031981//nucle…	GO:0098772//molecular function regulator;GO:0000988//transcription factor activity, protein binding;GO:0016301//kinase activity;GO:0003824//catalytic activity;GO:0030234//enzyme regulator activity;GO:0016772//transferase activity, transferring phosphorus-containing groups;GO:0019899//enzyme binding;GO:0016740//transferase activity;GO:0005488//binding;GO:0005515//protein binding;GO:0003674//molecu…	GO:0050896//response to stimulus;GO:0007049//cell cycle;GO:0051716//cellular response to stimulus;GO:0006464//cellular protein modification process;GO:0006807//nitrogen compound metabolic process;GO:0065007//biological regulation;GO:0044260//cellular macromolecule metabolic process;GO:0036211//protein modification process;GO:0034641//cellular nitrogen compound metabolic process;GO:0044699//single…
ENSG00000105185	1649	712.333	200.833	113.787	-1.17463	0.00654366	0.0484842	down	PDCD5	programmed cell death 5 [Source:HGNC Symbol;Acc:8764]	-	-	-	-	GO:0044464//cell part;GO:0043227//membrane-bounded organelle;GO:0005623//cell;GO:0043229//intracellular organelle;GO:0005622//intracellular;GO:0044424//intracellular part;GO:0005737//cytoplasm;GO:0005575//cellular_component;GO:0043226//organelle;GO:0005634//nucleus;GO:0043231//intracellular membrane-bounded organelle	GO:0005488//binding;GO:0003676//nucleic acid binding;GO:0003674//molecular_function;GO:1901363//heterocyclic compound binding;GO:0097159//organic cyclic compound binding;GO:0003677//DNA binding	GO:0044699//single-organism process;GO:0008219//cell death;GO:0009987//cellular process;GO:0008150//biological_process;GO:0044763//single-organism cellular process
ENSG00000105193	23646.3	5854.66	4413.39	1625	-1.95472	0.000369122	0.00937388	down	RPS16	ribosomal protein S16 [Source:HGNC Symbol;Acc:10396]	Genetic Information Processing	Translation	ko03010//Ribosome	K02960	GO:0005575//cellular_component;GO:0043228//non-membrane-bounded organelle;GO:0005737//cytoplasm;GO:0005840//ribosome;GO:0005829//cytosol;GO:0005623//cell;GO:0005622//intracellular;GO:0044424//intracellular part;GO:0032991//macromolecular complex;GO:0043229//intracellular organelle;GO:0030529//intracellular ribonucleoprotein complex;GO:0043232//intracellular non-membrane-bounded organelle;GO:00432…	GO:1901363//heterocyclic compound binding;GO:0003674//molecular_function;GO:0003735//structural constituent of ribosome;GO:0003676//nucleic acid binding;GO:0097159//organic cyclic compound binding;GO:0005488//binding;GO:0003723//RNA binding;GO:0005198//structural molecule activity	GO:0045184//establishment of protein localization;GO:0044248//cellular catabolic process;GO:0043603//cellular amide metabolic process;GO:1901576//organic substance biosynthetic process;GO:0034641//cellular nitrogen compound metabolic process;GO:0061024//membrane organization;GO:0044270//cellular nitrogen compound catabolic process;GO:0015031//protein transport;GO:1901566//organonitrogen compound …
ENSG00000105197	3858.44	1439.71	168.74	80.74	-1.37181	0.00250442	0.0278332	down	TIMM50	-	-	-	-	-	GO:0043233//organelle lumen;GO:0005634//nucleus;GO:0070013//intracellular organelle lumen;GO:0044424//intracellular part;GO:0044428//nuclear part;GO:0044422//organelle part;GO:0005575//cellular_component;GO:0005739//mitochondrion;GO:0005623//cell;GO:0044446//intracellular organelle part;GO:0043231//intracellular membrane-bounded organelle;GO:0043226//organelle;GO:0044464//cell part;GO:0031981//nu…	GO:0016787//hydrolase activity;GO:0097159//organic cyclic compound binding;GO:0042578//phosphoric ester hydrolase activity;GO:0005488//binding;GO:0016788//hydrolase activity, acting on ester bonds;GO:0003676//nucleic acid binding;GO:0016791//phosphatase activity;GO:0003824//catalytic activity;GO:0003674//molecular_function;GO:0003723//RNA binding;GO:1901363//heterocyclic compound binding	GO:0071702//organic substance transport;GO:0034613//cellular protein localization;GO:0044238//primary metabolic process;GO:0023052//signaling;GO:0007165//signal transduction;GO:0050896//response to stimulus;GO:0008150//biological_process;GO:0044763//single-organism cellular process;GO:0006464//cellular protein modification process;GO:0061024//membrane organization;GO:0036211//protein modification…
ENSG00000105202	7892.33	2368.33	558.367	248.387	-1.67498	0.00110141	0.0173889	down	FBL	-	Genetic Information Processing	Translation	ko03008//Ribosome biogenesis in eukaryotes	K14563	GO:0032991//macromolecular complex;GO:0044428//nuclear part;GO:0005654//nucleoplasm;GO:0005575//cellular_component;GO:0043233//organelle lumen;GO:0005634//nucleus;GO:0031974//membrane-enclosed lumen;GO:0005623//cell;GO:0044424//intracellular part;GO:0044422//organelle part;GO:0005737//cytoplasm;GO:0043226//organelle;GO:0043234//protein complex;GO:0044446//intracellular organelle part;GO:0043228//…	GO:0003676//nucleic acid binding;GO:0003723//RNA binding;GO:0008168//methyltransferase activity;GO:0016741//transferase activity, transferring one-carbon groups;GO:0097159//organic cyclic compound binding;GO:0016740//transferase activity;GO:0003824//catalytic activity;GO:0005488//binding;GO:0003674//molecular_function;GO:1901363//heterocyclic compound binding	GO:0022613//ribonucleoprotein complex biogenesis;GO:0008150//biological_process;GO:0043170//macromolecule metabolic process;GO:0071840//cellular component organization or biogenesis;GO:0006725//cellular aromatic compound metabolic process;GO:0008152//metabolic process;GO:0006807//nitrogen compound metabolic process;GO:0071704//organic substance metabolic process;GO:0006139//nucleobase-containing …
ENSG00000105219	31.6667	1.33333	0.983333	0.0766667	-4.39937	2.55932e-07	5.51259e-05	down	CNTD2	-	-	-	-	-	GO:0044464//cell part;GO:0005622//intracellular;GO:0043231//intracellular membrane-bounded organelle;GO:0043226//organelle;GO:0043229//intracellular organelle;GO:0044424//intracellular part;GO:0005634//nucleus;GO:0005623//cell;GO:0005575//cellular_component;GO:0043227//membrane-bounded organelle	GO:0019899//enzyme binding;GO:0005488//binding;GO:0005515//protein binding;GO:0003674//molecular_function	GO:0008150//biological_process
ENSG00000105248	1443	421	52.69	20.9333	-1.71692	0.000655226	0.0129113	down	CCDC94	-	-	-	-	-	-	-	-
ENSG00000105254	3436.73	1310.46	234.807	122.797	-1.34286	0.00346326	0.0331013	down	TBCB	tubulin folding cofactor B [Source:HGNC Symbol;Acc:1989]	-	-	-	-	GO:0043232//intracellular non-membrane-bounded organelle;GO:0043228//non-membrane-bounded organelle;GO:0005856//cytoskeleton;GO:0043229//intracellular organelle;GO:0032991//macromolecular complex;GO:0005737//cytoplasm;GO:0044464//cell part;GO:0005575//cellular_component;GO:0043234//protein complex;GO:0005622//intracellular;GO:0005623//cell;GO:0043226//organelle;GO:0044424//intracellular part	GO:0003674//molecular_function	GO:0006457//protein folding;GO:0030154//cell differentiation;GO:0009987//cellular process;GO:0008150//biological_process;GO:0044763//single-organism cellular process;GO:0044699//single-organism process;GO:0048856//anatomical structure development;GO:0032502//developmental process;GO:0044767//single-organism developmental process;GO:0048869//cellular developmental process
ENSG00000105255	798.667	311.667	23.1267	11.8567	-1.30351	0.00666534	0.0489829	down	FSD1	fibronectin type III and SPRY domain containing 1 [Source:HGNC Symbol;Acc:13745]	-	-	-	-	GO:0044430//cytoskeletal part;GO:0005634//nucleus;GO:0032991//macromolecular complex;GO:0005623//cell;GO:0015630//microtubule cytoskeleton;GO:0005737//cytoplasm;GO:0005575//cellular_component;GO:0043226//organelle;GO:0005622//intracellular;GO:0044446//intracellular organelle part;GO:0043228//non-membrane-bounded organelle;GO:0044424//intracellular part;GO:0005856//cytoskeleton;GO:0043227//membran…	GO:0003674//molecular_function	GO:0071840//cellular component organization or biogenesis;GO:0048285//organelle fission;GO:0007067//mitotic nuclear division;GO:0009987//cellular process;GO:0022402//cell cycle process;GO:1903047//mitotic cell cycle process;GO:0007049//cell cycle;GO:0044699//single-organism process;GO:0051301//cell division;GO:0016043//cellular component organization;GO:0008150//biological_process;GO:0000280//nuc…
ENSG00000105258	951.6	176.207	104.13	26.7	-2.37061	0.00011014	0.00489504	down	POLR2I	-	Genetic Information Processing;Metabolism;Human Diseases	Nucleotide metabolism;Infectious diseases;Transcription;Neurodegenerative diseases	ko05169//Epstein-Barr virus infection;ko05016//Huntington's disease;ko00230//Purine metabolism;ko00240//Pyrimidine metabolism;ko03020//RNA polymerase	K03017	GO:0044424//intracellular part;GO:0044446//intracellular organelle part;GO:0031981//nuclear lumen;GO:0043234//protein complex;GO:0043233//organelle lumen;GO:0005623//cell;GO:0005654//nucleoplasm;GO:0043226//organelle;GO:0043229//intracellular organelle;GO:0044464//cell part;GO:0043227//membrane-bounded organelle;GO:0044422//organelle part;GO:0044428//nuclear part;GO:0043231//intracellular membran…	GO:0016772//transferase activity, transferring phosphorus-containing groups;GO:0005488//binding;GO:0016779//nucleotidyltransferase activity;GO:0097159//organic cyclic compound binding;GO:0043167//ion binding;GO:1901363//heterocyclic compound binding;GO:0016740//transferase activity;GO:0003824//catalytic activity;GO:0003676//nucleic acid binding;GO:0003677//DNA binding;GO:0003674//molecular_functi…	GO:0044238//primary metabolic process;GO:0016070//RNA metabolic process;GO:0006139//nucleobase-containing compound metabolic process;GO:0006950//response to stress;GO:0071704//organic substance metabolic process;GO:0044260//cellular macromolecule metabolic process;GO:0008152//metabolic process;GO:0006807//nitrogen compound metabolic process;GO:0050896//response to stimulus;GO:0044237//cellular me…
ENSG00000105364	4958	1238	191.58	63.3733	-1.93995	0.000133982	0.00552195	down	MRPL4	mitochondrial ribosomal protein L4 [Source:HGNC Symbol;Acc:14276]	Genetic Information Processing	Translation	ko03010//Ribosome	K02926	GO:0044424//intracellular part;GO:0005622//intracellular;GO:0043227//membrane-bounded organelle;GO:0043229//intracellular organelle;GO:0044464//cell part;GO:0043232//intracellular non-membrane-bounded organelle;GO:0044444//cytoplasmic part;GO:0032991//macromolecular complex;GO:0005575//cellular_component;GO:0005840//ribosome;GO:0043226//organelle;GO:0043228//non-membrane-bounded organelle;GO:0005…	GO:0003735//structural constituent of ribosome;GO:0005198//structural molecule activity;GO:0003674//molecular_function	GO:0043603//cellular amide metabolic process;GO:0044260//cellular macromolecule metabolic process;GO:0009059//macromolecule biosynthetic process;GO:0044249//cellular biosynthetic process;GO:0034641//cellular nitrogen compound metabolic process;GO:0043604//amide biosynthetic process;GO:0044267//cellular protein metabolic process;GO:0009058//biosynthetic process;GO:0008152//metabolic process;GO:000…
ENSG00000105369	6.66667	0.666667	0.303333	0.04	-3.05131	0.0057908	0.0450253	down	CD79A	CD79a molecule, immunoglobulin-associated alpha [Source:HGNC Symbol;Acc:1698]	Organismal Systems;Human Diseases	Immune diseases;Immune system	ko04662//B cell receptor signaling pathway;ko05340//Primary immunodeficiency	K06506	GO:0012505//endomembrane system;GO:0044464//cell part;GO:0005623//cell;GO:0005575//cellular_component;GO:0043227//membrane-bounded organelle;GO:0005886//plasma membrane;GO:0005768//endosome;GO:0043234//protein complex;GO:0032991//macromolecular complex;GO:0043226//organelle;GO:0043229//intracellular organelle;GO:0043231//intracellular membrane-bounded organelle;GO:0044424//intracellular part;GO:0…	GO:0004871//signal transducer activity;GO:0003674//molecular_function	GO:0009987//cellular process;GO:0008283//cell proliferation;GO:0065007//biological regulation;GO:0044700//single organism signaling;GO:0030154//cell differentiation;GO:0050896//response to stimulus;GO:0044763//single-organism cellular process;GO:0007154//cell communication;GO:0007165//signal transduction;GO:0008150//biological_process;GO:0032502//developmental process;GO:0051716//cellular respons…
ENSG00000105372	26056	4975.67	3004.98	792.887	-2.32087	0.000107908	0.00489504	down	RPS19	ribosomal protein S19 [Source:HGNC Symbol;Acc:10402]	Genetic Information Processing	Translation	ko03010//Ribosome	K02966	GO:0044464//cell part;GO:0005730//nucleolus;GO:0005623//cell;GO:0043229//intracellular organelle;GO:1990904//ribonucleoprotein complex;GO:0043231//intracellular membrane-bounded organelle;GO:0005622//intracellular;GO:0043226//organelle;GO:0005829//cytosol;GO:0043232//intracellular non-membrane-bounded organelle;GO:0030529//intracellular ribonucleoprotein complex;GO:0070013//intracellular organell…	GO:0005488//binding;GO:0005198//structural molecule activity;GO:0019899//enzyme binding;GO:0003674//molecular_function;GO:0005515//protein binding;GO:0003735//structural constituent of ribosome	GO:0043170//macromolecule metabolic process;GO:0043933//macromolecular complex subunit organization;GO:0006518//peptide metabolic process;GO:0044260//cellular macromolecule metabolic process;GO:0006461//protein complex assembly;GO:0070727//cellular macromolecule localization;GO:0071702//organic substance transport;GO:0051674//localization of cell;GO:0044085//cellular component biogenesis;GO:00511…
ENSG00000105373	7797.67	2546	271.963	157.287	-1.55066	0.0033338	0.032493	down	GLTSCR2	glioma tumor suppressor candidate region gene 2 [Source:HGNC Symbol;Acc:4333]	Human Diseases	Infectious diseases	ko05168//Herpes simplex infection	K14840	GO:0043227//membrane-bounded organelle;GO:0043226//organelle;GO:0031974//membrane-enclosed lumen;GO:0043228//non-membrane-bounded organelle;GO:0043232//intracellular non-membrane-bounded organelle;GO:0031981//nuclear lumen;GO:0005730//nucleolus;GO:0044424//intracellular part;GO:0044422//organelle part;GO:0044464//cell part;GO:0044446//intracellular organelle part;GO:0044428//nuclear part;GO:00432…	GO:0003674//molecular_function	GO:0008150//biological_process
ENSG00000105376	23	61.6667	0.573333	1.62667	1.42826	0.00247364	0.0275928	up	ICAM5	intercellular adhesion molecule 5, telencephalin [Source:HGNC Symbol;Acc:5348]	-	-	-	-	GO:0016020//membrane;GO:0005575//cellular_component;GO:0044464//cell part;GO:0071944//cell periphery;GO:0005886//plasma membrane;GO:0005623//cell	GO:0003674//molecular_function	GO:0016192//vesicle-mediated transport;GO:0007155//cell adhesion;GO:0006810//transport;GO:0051179//localization;GO:0008150//biological_process;GO:0051234//establishment of localization;GO:0022610//biological adhesion
ENSG00000105379	1989.33	413.72	133.83	37.2467	-2.19279	0.000299238	0.00862767	down	ETFB	electron-transfer-flavoprotein, beta polypeptide [Source:HGNC Symbol;Acc:3482]	-	-	-	-	GO:0005623//cell;GO:0005737//cytoplasm;GO:0005622//intracellular;GO:0044464//cell part;GO:0005739//mitochondrion;GO:0043229//intracellular organelle;GO:0005575//cellular_component;GO:0043226//organelle;GO:0044424//intracellular part;GO:0043227//membrane-bounded organelle;GO:0044444//cytoplasmic part;GO:0043231//intracellular membrane-bounded organelle	GO:0003674//molecular_function	GO:0008152//metabolic process;GO:0044281//small molecule metabolic process;GO:0006091//generation of precursor metabolites and energy;GO:0044237//cellular metabolic process;GO:0009987//cellular process;GO:0008150//biological_process;GO:0044710//single-organism metabolic process;GO:0044699//single-organism process
ENSG00000105393	4286.04	1767.78	183.617	114.113	-1.22947	0.00654969	0.0484937	down	BABAM1	BRISC and BRCA1 A complex member 1 [Source:HGNC Symbol;Acc:25008]	-	-	-	-	GO:0005575//cellular_component;GO:0005737//cytoplasm;GO:0043231//intracellular membrane-bounded organelle;GO:0044424//intracellular part;GO:0043234//protein complex;GO:0032991//macromolecular complex;GO:0043227//membrane-bounded organelle;GO:0005634//nucleus;GO:0044464//cell part;GO:0005622//intracellular;GO:0043229//intracellular organelle;GO:0005623//cell;GO:0043226//organelle	GO:0003674//molecular_function	GO:0006807//nitrogen compound metabolic process;GO:0036211//protein modification process;GO:0006464//cellular protein modification process;GO:0071704//organic substance metabolic process;GO:0008152//metabolic process;GO:0051276//chromosome organization;GO:0006996//organelle organization;GO:0050896//response to stimulus;GO:0006139//nucleobase-containing compound metabolic process;GO:0007049//cell …
ENSG00000105401	9010.67	3916.67	304.46	175.747	-1.15859	0.00663584	0.0488771	down	CDC37	cell division cycle 37 [Source:HGNC Symbol;Acc:1735]	Environmental Information Processing	Signal transduction	ko04151//PI3K-Akt signaling pathway	K09554	GO:0005622//intracellular;GO:0044464//cell part;GO:0032991//macromolecular complex;GO:0005575//cellular_component;GO:0005829//cytosol;GO:0005886//plasma membrane;GO:0005737//cytoplasm;GO:0005623//cell;GO:0044424//intracellular part;GO:0043234//protein complex;GO:0071944//cell periphery;GO:0044444//cytoplasmic part;GO:0016020//membrane	GO:0005488//binding;GO:0005515//protein binding;GO:0003674//molecular_function;GO:0051082//unfolded protein binding;GO:0019899//enzyme binding	GO:0008104//protein localization;GO:0051179//localization;GO:0045184//establishment of protein localization;GO:0006886//intracellular protein transport;GO:0006810//transport;GO:0046907//intracellular transport;GO:0015031//protein transport;GO:0034613//cellular protein localization;GO:0033036//macromolecule localization;GO:0051234//establishment of localization;GO:0051641//cellular localization;GO…
ENSG00000105404	3552	720	290.9	86.1333	-2.23341	0.000254749	0.00791956	down	RABAC1	Rab acceptor 1 (prenylated) [Source:HGNC Symbol;Acc:9794]	-	-	-	-	GO:0005886//plasma membrane;GO:0005622//intracellular;GO:0005794//Golgi apparatus;GO:0016020//membrane;GO:0031988//membrane-bounded vesicle;GO:0043227//membrane-bounded organelle;GO:0031410//cytoplasmic vesicle;GO:0044464//cell part;GO:0097708//intracellular vesicle;GO:0043226//organelle;GO:0044444//cytoplasmic part;GO:0071944//cell periphery;GO:0043231//intracellular membrane-bounded organelle;G…	GO:0003674//molecular_function	-
ENSG00000105447	2156.29	924	27.68	21.1733	-1.18049	0.00179797	0.0228446	down	GRWD1	glutamate-rich WD repeat containing 1 [Source:HGNC Symbol;Acc:21270]	-	-	-	-	GO:0043232//intracellular non-membrane-bounded organelle;GO:0044446//intracellular organelle part;GO:0005737//cytoplasm;GO:0043227//membrane-bounded organelle;GO:0044464//cell part;GO:0043231//intracellular membrane-bounded organelle;GO:0005575//cellular_component;GO:0044424//intracellular part;GO:0005623//cell;GO:0043228//non-membrane-bounded organelle;GO:0044428//nuclear part;GO:0031974//membra…	GO:0003674//molecular_function	-
ENSG00000105472	135.667	29.6667	4.77	1.49333	-2.11341	0.00194067	0.0240665	down	CLEC11A	C-type lectin domain family 11, member A [Source:HGNC Symbol;Acc:10576]	-	-	-	-	GO:0044422//organelle part;GO:0005623//cell;GO:0005737//cytoplasm;GO:0043226//organelle;GO:0005576//extracellular region;GO:0044424//intracellular part;GO:0044446//intracellular organelle part;GO:0015630//microtubule cytoskeleton;GO:0043229//intracellular organelle;GO:0043228//non-membrane-bounded organelle;GO:0044430//cytoskeletal part;GO:0043232//intracellular non-membrane-bounded organelle;GO:…	GO:0003674//molecular_function	GO:0008150//biological_process
ENSG00000105518	2053.21	626.923	178.843	75.1567	-1.65106	0.00194005	0.0240665	down	TMEM205	transmembrane protein 205 [Source:HGNC Symbol;Acc:29631]	-	-	-	-	GO:0005575//cellular_component	-	-
ENSG00000105583	4977.79	1345.91	270.377	76.0333	-1.82832	0.000594054	0.0122916	down	WDR83OS	WD repeat domain 83 opposite strand [Source:HGNC Symbol;Acc:30203]	-	-	-	-	GO:0005575//cellular_component	-	-
ENSG00000105617	319.163	85.6633	10.4133	3.88	-1.82715	0.001563	0.0210266	down	LENG1	leukocyte receptor cluster (LRC) member 1 [Source:HGNC Symbol;Acc:15502]	-	-	-	-	GO:0005575//cellular_component	GO:0003674//molecular_function	GO:0008150//biological_process
ENSG00000105618	3762.13	1467.67	93.7167	64.7433	-1.29776	0.00547997	0.0436012	down	PRPF31	pre-mRNA processing factor 31 [Source:HGNC Symbol;Acc:15446]	Genetic Information Processing	Transcription	ko03040//Spliceosome	K12844	GO:0043226//organelle;GO:0032991//macromolecular complex;GO:0044422//organelle part;GO:0043227//membrane-bounded organelle;GO:0070013//intracellular organelle lumen;GO:0044446//intracellular organelle part;GO:0044464//cell part;GO:0043234//protein complex;GO:0005575//cellular_component;GO:0044424//intracellular part;GO:0031974//membrane-enclosed lumen;GO:0043233//organelle lumen;GO:0031981//nucle…	GO:0005488//binding;GO:0003723//RNA binding;GO:0003674//molecular_function;GO:1901363//heterocyclic compound binding;GO:0003676//nucleic acid binding;GO:0097159//organic cyclic compound binding	GO:0044085//cellular component biogenesis;GO:0071826//ribonucleoprotein complex subunit organization;GO:0010467//gene expression;GO:0006725//cellular aromatic compound metabolic process;GO:0022618//ribonucleoprotein complex assembly;GO:0034622//cellular macromolecular complex assembly;GO:0071840//cellular component organization or biogenesis;GO:0044237//cellular metabolic process;GO:0006807//nitr…
ENSG00000105619	1084.87	184.333	56.5733	11.85	-2.48977	3.65684e-05	0.00269445	down	TFPT	TCF3 (E2A) fusion partner (in childhood Leukemia) [Source:HGNC Symbol;Acc:13630]	-	-	-	-	GO:0043233//organelle lumen;GO:0043228//non-membrane-bounded organelle;GO:0005634//nucleus;GO:0005737//cytoplasm;GO:0005694//chromosome;GO:0000228//nuclear chromosome;GO:0044446//intracellular organelle part;GO:0031974//membrane-enclosed lumen;GO:0043232//intracellular non-membrane-bounded organelle;GO:0043227//membrane-bounded organelle;GO:0070013//intracellular organelle lumen;GO:0043234//prote…	GO:0003674//molecular_function;GO:1901363//heterocyclic compound binding;GO:0003676//nucleic acid binding;GO:0003677//DNA binding;GO:0005515//protein binding;GO:0005488//binding;GO:0019899//enzyme binding;GO:0097159//organic cyclic compound binding	GO:0044700//single organism signaling;GO:0008150//biological_process;GO:0071704//organic substance metabolic process;GO:0006950//response to stress;GO:0044260//cellular macromolecule metabolic process;GO:0009058//biosynthetic process;GO:1901360//organic cyclic compound metabolic process;GO:0006139//nucleobase-containing compound metabolic process;GO:0044699//single-organism process;GO:0006725//ce…
ENSG00000105640	35894.3	7416.67	4391.46	1346.79	-2.2064	0.00016826	0.00640867	down	RPL18A	ribosomal protein L18a [Source:HGNC Symbol;Acc:10311]	Genetic Information Processing	Translation	ko03010//Ribosome	K02882	GO:0043232//intracellular non-membrane-bounded organelle;GO:0005623//cell;GO:0032991//macromolecular complex;GO:0043228//non-membrane-bounded organelle;GO:0005737//cytoplasm;GO:1990904//ribonucleoprotein complex;GO:0044464//cell part;GO:0005575//cellular_component;GO:0044424//intracellular part;GO:0043229//intracellular organelle;GO:0005840//ribosome;GO:0005829//cytosol;GO:0043226//organelle;GO:0…	GO:1901363//heterocyclic compound binding;GO:0005488//binding;GO:0003723//RNA binding;GO:0003676//nucleic acid binding;GO:0005198//structural molecule activity;GO:0003674//molecular_function;GO:0003735//structural constituent of ribosome;GO:0097159//organic cyclic compound binding	GO:0043604//amide biosynthetic process;GO:0071704//organic substance metabolic process;GO:0009987//cellular process;GO:0044248//cellular catabolic process;GO:0051641//cellular localization;GO:1901576//organic substance biosynthetic process;GO:0061024//membrane organization;GO:0043603//cellular amide metabolic process;GO:0044270//cellular nitrogen compound catabolic process;GO:0044271//cellular ni…
ENSG00000105650	12	1.66667	0.43	0.0333333	-2.67469	0.00280695	0.0294926	down	PDE4C	-	Environmental Information Processing;Human Diseases;Metabolism	Nucleotide metabolism;Signal transduction;Substance dependence	ko04024//cAMP signaling pathway;ko00230//Purine metabolism;ko05032//Morphine addiction	K13293	GO:0044464//cell part;GO:0042995//cell projection;GO:0005623//cell;GO:0044444//cytoplasmic part;GO:0005622//intracellular;GO:0005575//cellular_component;GO:0043226//organelle;GO:0005829//cytosol;GO:0005929//cilium;GO:0044424//intracellular part;GO:0005737//cytoplasm	GO:0003674//molecular_function;GO:0005488//binding;GO:0043167//ion binding	GO:0006807//nitrogen compound metabolic process;GO:0050794//regulation of cellular process;GO:0009056//catabolic process;GO:0065007//biological regulation;GO:0046700//heterocycle catabolic process;GO:1901575//organic substance catabolic process;GO:0008152//metabolic process;GO:0034641//cellular nitrogen compound metabolic process;GO:1901361//organic cyclic compound catabolic process;GO:0046483//h…
ENSG00000105669	8892.3	2353	476.877	167.837	-1.85572	0.000414714	0.00998935	down	COPE	coatomer protein complex, subunit epsilon [Source:HGNC Symbol;Acc:2234]	-	-	-	-	GO:0043231//intracellular membrane-bounded organelle;GO:0005794//Golgi apparatus;GO:0043234//protein complex;GO:0031988//membrane-bounded vesicle;GO:0005737//cytoplasm;GO:0016023//cytoplasmic, membrane-bounded vesicle;GO:0005623//cell;GO:0043229//intracellular organelle;GO:0043227//membrane-bounded organelle;GO:0005575//cellular_component;GO:0044424//intracellular part;GO:0044464//cell part;GO:00…	GO:0005198//structural molecule activity;GO:0003674//molecular_function	GO:0061024//membrane organization;GO:0016043//cellular component organization;GO:0008150//biological_process;GO:0006810//transport;GO:0016192//vesicle-mediated transport;GO:0051234//establishment of localization;GO:0071840//cellular component organization or biogenesis;GO:0051179//localization;GO:0009987//cellular process
ENSG00000105677	2827.67	923.667	208.727	93.2133	-1.56356	0.0013203	0.0190042	down	TMEM147	-	-	-	-	-	GO:0005737//cytoplasm;GO:0044444//cytoplasmic part;GO:0043229//intracellular organelle;GO:0005623//cell;GO:0005575//cellular_component;GO:0044424//intracellular part;GO:0005783//endoplasmic reticulum;GO:0044464//cell part;GO:0005622//intracellular;GO:0043231//intracellular membrane-bounded organelle;GO:0043227//membrane-bounded organelle;GO:0043226//organelle;GO:0012505//endomembrane system	-	-
ENSG00000105701	16135.7	5467	453.613	208.27	-1.50209	0.00365245	0.0340287	down	FKBP8	-	-	-	-	-	GO:0043226//organelle;GO:0012505//endomembrane system;GO:0044424//intracellular part;GO:0043227//membrane-bounded organelle;GO:0005623//cell;GO:0005739//mitochondrion;GO:0005783//endoplasmic reticulum;GO:0005575//cellular_component;GO:0043229//intracellular organelle;GO:0005622//intracellular;GO:0044444//cytoplasmic part;GO:0044464//cell part;GO:0043231//intracellular membrane-bounded organelle;G…	GO:0016853//isomerase activity;GO:0005488//binding;GO:0003674//molecular_function;GO:0003824//catalytic activity;GO:0043167//ion binding	GO:0006457//protein folding;GO:0032502//developmental process;GO:0051704//multi-organism process;GO:0048856//anatomical structure development;GO:0040007//growth;GO:0044699//single-organism process;GO:0019538//protein metabolic process;GO:0071704//organic substance metabolic process;GO:0044419//interspecies interaction between organisms;GO:0044260//cellular macromolecule metabolic process;GO:00442…
ENSG00000105755	1005.33	356	70.3367	33.8367	-1.44679	0.00215115	0.0254317	down	ETHE1	-	Metabolism	Energy metabolism	ko00920//Sulfur metabolism	K17725	GO:0044464//cell part;GO:0005622//intracellular;GO:0005739//mitochondrion;GO:0005575//cellular_component;GO:0044424//intracellular part;GO:0043231//intracellular membrane-bounded organelle;GO:0005634//nucleus;GO:0043226//organelle;GO:0005737//cytoplasm;GO:0043227//membrane-bounded organelle;GO:0043229//intracellular organelle;GO:0005623//cell;GO:0044444//cytoplasmic part	GO:0043167//ion binding;GO:0005488//binding;GO:0003674//molecular_function;GO:0003824//catalytic activity;GO:0016491//oxidoreductase activity	GO:0034641//cellular nitrogen compound metabolic process;GO:0006807//nitrogen compound metabolic process;GO:0044699//single-organism process;GO:0071704//organic substance metabolic process;GO:0009987//cellular process;GO:1901564//organonitrogen compound metabolic process;GO:0006082//organic acid metabolic process;GO:0009056//catabolic process;GO:0043436//oxoacid metabolic process;GO:0044710//sing…
ENSG00000106009	1802.67	663	28.7567	14.09	-1.38587	0.00336476	0.0326953	down	BRAT1	BRCA1-associated ATM activator 1 [Source:HGNC Symbol;Acc:21701]	-	-	-	-	GO:0005575//cellular_component;GO:0005623//cell;GO:0043229//intracellular organelle;GO:0043231//intracellular membrane-bounded organelle;GO:0044424//intracellular part;GO:0005634//nucleus;GO:0044464//cell part;GO:0043226//organelle;GO:0043227//membrane-bounded organelle;GO:0005622//intracellular	GO:0003674//molecular_function	GO:0008150//biological_process
ENSG00000106028	1971	914.333	271.613	163.59	-1.07298	0.00593153	0.0456483	down	SSBP1	single-stranded DNA binding protein 1, mitochondrial [Source:HGNC Symbol;Acc:11317]	Genetic Information Processing	Replication and repair	ko03030//DNA replication;ko03440//Homologous recombination;ko03430//Mismatch repair	K03111	GO:0005739//mitochondrion;GO:0044464//cell part;GO:0043226//organelle;GO:0043229//intracellular organelle;GO:0044444//cytoplasmic part;GO:0005575//cellular_component;GO:0043227//membrane-bounded organelle;GO:0005623//cell;GO:0005737//cytoplasm;GO:0044424//intracellular part;GO:0043231//intracellular membrane-bounded organelle;GO:0005622//intracellular	GO:0003677//DNA binding;GO:0003676//nucleic acid binding;GO:0005488//binding;GO:0003674//molecular_function;GO:1901363//heterocyclic compound binding;GO:0097159//organic cyclic compound binding	GO:0071840//cellular component organization or biogenesis;GO:0016043//cellular component organization;GO:0071704//organic substance metabolic process;GO:0048856//anatomical structure development;GO:0009058//biosynthetic process;GO:0006725//cellular aromatic compound metabolic process;GO:0043170//macromolecule metabolic process;GO:0046483//heterocycle metabolic process;GO:0009987//cellular process…
ENSG00000106031	66	174.667	1.20667	3.67667	1.43314	0.00152712	0.0206812	up	HOXA13	homeobox A13 [Source:HGNC Symbol;Acc:5102]	-	-	-	-	GO:0005575//cellular_component;GO:0005622//intracellular;GO:0044464//cell part;GO:0043231//intracellular membrane-bounded organelle;GO:0005634//nucleus;GO:0043226//organelle;GO:0043229//intracellular organelle;GO:0043227//membrane-bounded organelle;GO:0044424//intracellular part;GO:0005623//cell	GO:0001071//nucleic acid binding transcription factor activity;GO:1901363//heterocyclic compound binding;GO:0003676//nucleic acid binding;GO:0003674//molecular_function;GO:0003677//DNA binding;GO:0005488//binding;GO:0097159//organic cyclic compound binding	GO:0044699//single-organism process;GO:0008150//biological_process;GO:0044237//cellular metabolic process;GO:0016043//cellular component organization;GO:0006807//nitrogen compound metabolic process;GO:0030154//cell differentiation;GO:0009653//anatomical structure morphogenesis;GO:0032501//multicellular organismal process;GO:0009058//biosynthetic process;GO:0034641//cellular nitrogen compound meta…
ENSG00000106153	7220.67	2696.67	542.18	270.31	-1.37766	0.00209797	0.0251638	down	CHCHD2	coiled-coil-helix-coiled-coil-helix domain containing 2 [Source:HGNC Symbol;Acc:21645]	-	-	-	-	GO:0005622//intracellular;GO:0005575//cellular_component;GO:0005739//mitochondrion;GO:0043227//membrane-bounded organelle;GO:0043226//organelle;GO:0005623//cell;GO:0043229//intracellular organelle;GO:0044444//cytoplasmic part;GO:0044464//cell part;GO:0005737//cytoplasm;GO:0044424//intracellular part;GO:0043231//intracellular membrane-bounded organelle	-	-
ENSG00000106211	7046.67	1391	467.643	134.07	-2.26811	0.000211513	0.00725991	down	HSPB1	-	Environmental Information Processing;Human Diseases	Signal transduction;Infectious diseases	ko05169//Epstein-Barr virus infection;ko04010//MAPK signaling pathway;ko05146//Amoebiasis;ko04370//VEGF signaling pathway	K04455	GO:0005886//plasma membrane;GO:0043234//protein complex;GO:0044424//intracellular part;GO:0005856//cytoskeleton;GO:0043228//non-membrane-bounded organelle;GO:0005575//cellular_component;GO:0043227//membrane-bounded organelle;GO:0043226//organelle;GO:0016020//membrane;GO:0043229//intracellular organelle;GO:0032991//macromolecular complex;GO:0043231//intracellular membrane-bounded organelle;GO:0005…	GO:0005488//binding;GO:0030234//enzyme regulator activity;GO:0019899//enzyme binding;GO:0005515//protein binding;GO:0003674//molecular_function;GO:0032182//ubiquitin-like protein binding;GO:0098772//molecular function regulator	GO:0007165//signal transduction;GO:0006807//nitrogen compound metabolic process;GO:0051716//cellular response to stimulus;GO:0008219//cell death;GO:0044699//single-organism process;GO:0008150//biological_process;GO:0065007//biological regulation;GO:0007154//cell communication;GO:0006950//response to stress;GO:0044763//single-organism cellular process;GO:0044237//cellular metabolic process;GO:0050…
ENSG00000106236	146.333	31	2.69667	0.696667	-2.19219	2.61993e-06	0.00039834	down	NPTX2	neuronal pentraxin II [Source:HGNC Symbol;Acc:7953]	-	-	-	-	GO:0005576//extracellular region;GO:0005575//cellular_component	GO:0043167//ion binding;GO:0005488//binding;GO:0003674//molecular_function	GO:0044763//single-organism cellular process;GO:0050877//neurological system process;GO:0008150//biological_process;GO:0044699//single-organism process;GO:0007154//cell communication;GO:0009987//cellular process;GO:0007267//cell-cell signaling;GO:0044700//single organism signaling;GO:0032501//multicellular organismal process;GO:0023052//signaling;GO:0003008//system process
ENSG00000106245	3234.2	851.327	214.043	80.6367	-1.86649	0.000180799	0.00663528	down	BUD31	BUD31 homolog (S. cerevisiae) [Source:HGNC Symbol;Acc:29629]	Genetic Information Processing	Transcription	ko03040//Spliceosome	K12873	GO:0005623//cell;GO:0043226//organelle;GO:0005634//nucleus;GO:0005622//intracellular;GO:0044464//cell part;GO:0005575//cellular_component;GO:0043227//membrane-bounded organelle;GO:0044424//intracellular part;GO:0043229//intracellular organelle;GO:0043231//intracellular membrane-bounded organelle	GO:0003674//molecular_function;GO:0001071//nucleic acid binding transcription factor activity	GO:0008150//biological_process
ENSG00000106258	14.5133	36.9533	0.45	1.06	1.34061	0.00409003	0.0365821	up	CYP3A5	-	Metabolism;Human Diseases	Metabolism of cofactors and vitamins;Xenobiotics biodegradation and metabolism;Cancers;Lipid metabolism	ko05204//Chemical carcinogenesis;ko00980//Metabolism of xenobiotics by cytochrome P450;ko00982//Drug metabolism - cytochrome P450;ko00140//Steroid hormone biosynthesis;ko00830//Retinol metabolism	K17690	GO:0005737//cytoplasm;GO:0005623//cell;GO:0005783//endoplasmic reticulum;GO:0043226//organelle;GO:0012505//endomembrane system;GO:0044464//cell part;GO:0043227//membrane-bounded organelle;GO:0005622//intracellular;GO:0043229//intracellular organelle;GO:0044444//cytoplasmic part;GO:0044424//intracellular part;GO:0005575//cellular_component;GO:0043231//intracellular membrane-bounded organelle	GO:0003824//catalytic activity;GO:0003674//molecular_function;GO:0043167//ion binding;GO:0005488//binding;GO:0016491//oxidoreductase activity	GO:0044699//single-organism process;GO:0071704//organic substance metabolic process;GO:0006807//nitrogen compound metabolic process;GO:0006629//lipid metabolic process;GO:0008152//metabolic process;GO:0034641//cellular nitrogen compound metabolic process;GO:0009056//catabolic process;GO:0044237//cellular metabolic process;GO:0044710//single-organism metabolic process;GO:0044238//primary metabolic…
ENSG00000106261	367.667	982.887	2.36333	6.74333	1.44125	0.000631849	0.0126601	up	ZKSCAN1	zinc finger with KRAB and SCAN domains 1 [Source:HGNC Symbol;Acc:13101]	-	-	-	-	GO:0043229//intracellular organelle;GO:0005739//mitochondrion;GO:0044444//cytoplasmic part;GO:0044464//cell part;GO:0005622//intracellular;GO:0043231//intracellular membrane-bounded organelle;GO:0005634//nucleus;GO:0005623//cell;GO:0005575//cellular_component;GO:0044424//intracellular part;GO:0005737//cytoplasm;GO:0043226//organelle;GO:0043227//membrane-bounded organelle	GO:0003674//molecular_function;GO:0003677//DNA binding;GO:0097159//organic cyclic compound binding;GO:0001071//nucleic acid binding transcription factor activity;GO:0005488//binding;GO:0043167//ion binding;GO:1901363//heterocyclic compound binding;GO:0003676//nucleic acid binding	GO:0009058//biosynthetic process;GO:0009987//cellular process;GO:0006807//nitrogen compound metabolic process;GO:0034641//cellular nitrogen compound metabolic process;GO:0008150//biological_process;GO:0044237//cellular metabolic process;GO:0008152//metabolic process
ENSG00000106268	635.667	124.333	74.34	21.6467	-2.28148	0.000330278	0.00897256	down	NUDT1	nudix (nucleoside diphosphate linked moiety X)-type motif 1 [Source:HGNC Symbol;Acc:8048]	-	-	-	-	GO:0043227//membrane-bounded organelle;GO:0043229//intracellular organelle;GO:0005575//cellular_component;GO:0044424//intracellular part;GO:0005623//cell;GO:0005829//cytosol;GO:0043231//intracellular membrane-bounded organelle;GO:0005634//nucleus;GO:0005739//mitochondrion;GO:0043226//organelle;GO:0044444//cytoplasmic part;GO:0044464//cell part;GO:0005622//intracellular;GO:0005737//cytoplasm	GO:0043167//ion binding;GO:0016818//hydrolase activity, acting on acid anhydrides, in phosphorus-containing anhydrides;GO:1901363//heterocyclic compound binding;GO:0097159//organic cyclic compound binding;GO:0016817//hydrolase activity, acting on acid anhydrides;GO:0017111//nucleoside-triphosphatase activity;GO:0016462//pyrophosphatase activity;GO:0003676//nucleic acid binding;GO:0003924//GTPase …	GO:0044710//single-organism metabolic process;GO:0046483//heterocycle metabolic process;GO:0044238//primary metabolic process;GO:0044260//cellular macromolecule metabolic process;GO:0009056//catabolic process;GO:0044270//cellular nitrogen compound catabolic process;GO:0006725//cellular aromatic compound metabolic process;GO:0044248//cellular catabolic process;GO:0044237//cellular metabolic proces…
ENSG00000106399	621.667	202.333	36.7933	14.5533	-1.56923	0.00128046	0.0187742	down	RPA3	-	Genetic Information Processing	Replication and repair	ko03460//Fanconi anemia pathway;ko03420//Nucleotide excision repair;ko03030//DNA replication;ko03440//Homologous recombination;ko03430//Mismatch repair	K10740	GO:0005623//cell;GO:0005634//nucleus;GO:0000228//nuclear chromosome;GO:0043228//non-membrane-bounded organelle;GO:0005694//chromosome;GO:0043231//intracellular membrane-bounded organelle;GO:0005737//cytoplasm;GO:0043229//intracellular organelle;GO:0005622//intracellular;GO:0043232//intracellular non-membrane-bounded organelle;GO:0043234//protein complex;GO:0043233//organelle lumen;GO:0005575//cel…	GO:0097159//organic cyclic compound binding;GO:0003674//molecular_function;GO:1901363//heterocyclic compound binding;GO:0003676//nucleic acid binding;GO:0005488//binding;GO:0003677//DNA binding	GO:0050896//response to stimulus;GO:0009058//biosynthetic process;GO:0046700//heterocycle catabolic process;GO:0051276//chromosome organization;GO:0022607//cellular component assembly;GO:0019439//aromatic compound catabolic process;GO:0071840//cellular component organization or biogenesis;GO:0065008//regulation of biological quality;GO:1901360//organic cyclic compound metabolic process;GO:0065003…
ENSG00000106400	1674.33	407.333	83.3633	26.9633	-1.97855	0.000246666	0.00784345	down	ZNHIT1	zinc finger, HIT-type containing 1 [Source:HGNC Symbol;Acc:21688]	-	-	-	-	GO:0044464//cell part;GO:0043229//intracellular organelle;GO:0005575//cellular_component;GO:0044424//intracellular part;GO:0005634//nucleus;GO:0005622//intracellular;GO:0043227//membrane-bounded organelle;GO:0005623//cell;GO:0043226//organelle;GO:0043231//intracellular membrane-bounded organelle	GO:0003674//molecular_function;GO:0005515//protein binding;GO:0005488//binding;GO:0019899//enzyme binding;GO:0043167//ion binding	GO:0008150//biological_process
ENSG00000106526	13.3333	36.08	0.503333	1.03333	1.45381	0.0036338	0.0339074	up	ACTR3C	ARP3 actin-related protein 3 homolog C (yeast) [Source:HGNC Symbol;Acc:37282]	-	-	-	-	GO:0043234//protein complex;GO:0032991//macromolecular complex;GO:0005622//intracellular;GO:0043226//organelle;GO:0044424//intracellular part;GO:0043232//intracellular non-membrane-bounded organelle;GO:0043228//non-membrane-bounded organelle;GO:0005856//cytoskeleton;GO:0043229//intracellular organelle;GO:0005575//cellular_component;GO:0044464//cell part;GO:0005623//cell	GO:0043167//ion binding;GO:0005515//protein binding;GO:0008092//cytoskeletal protein binding;GO:0003674//molecular_function;GO:0005488//binding	GO:0006996//organelle organization;GO:0008150//biological_process;GO:0009987//cellular process;GO:0016043//cellular component organization;GO:0071840//cellular component organization or biogenesis;GO:0007010//cytoskeleton organization
ENSG00000106538	773	136	63.3233	17.1533	-2.4257	0.00016816	0.00640867	down	RARRES2	-	-	-	-	-	GO:0005576//extracellular region;GO:0005575//cellular_component	GO:0003674//molecular_function	GO:0044707//single-multicellular organism process;GO:0006629//lipid metabolic process;GO:0044699//single-organism process;GO:0007275//multicellular organism development;GO:0008150//biological_process;GO:0044710//single-organism metabolic process;GO:0048856//anatomical structure development;GO:0044763//single-organism cellular process;GO:0009790//embryo development;GO:0030154//cell differentiation…
ENSG00000106588	2531.01	1101.08	135.583	57.4067	-1.16916	0.00372607	0.0344821	down	PSMA2	proteasome (prosome, macropain) subunit, alpha type, 2 [Source:HGNC Symbol;Acc:9531]	Genetic Information Processing	Folding, sorting and degradation	ko03050//Proteasome	K02726	GO:0031974//membrane-enclosed lumen;GO:0005575//cellular_component;GO:0044424//intracellular part;GO:0031981//nuclear lumen;GO:0044446//intracellular organelle part;GO:0005623//cell;GO:0043229//intracellular organelle;GO:0044428//nuclear part;GO:0032991//macromolecular complex;GO:0044444//cytoplasmic part;GO:0005622//intracellular;GO:0005654//nucleoplasm;GO:0043227//membrane-bounded organelle;GO:…	GO:0003824//catalytic activity;GO:0003674//molecular_function;GO:0008233//peptidase activity;GO:0016787//hydrolase activity	GO:0006950//response to stress;GO:0009987//cellular process;GO:0044699//single-organism process;GO:0051716//cellular response to stimulus;GO:0019538//protein metabolic process;GO:0007154//cell communication;GO:0007165//signal transduction;GO:0071704//organic substance metabolic process;GO:0051704//multi-organism process;GO:0050789//regulation of biological process;GO:0009056//catabolic process;GO…
ENSG00000106591	693.333	322.667	44.6167	23.6567	-1.07816	0.00500619	0.041473	down	MRPL32	mitochondrial ribosomal protein L32 [Source:HGNC Symbol;Acc:14035]	Genetic Information Processing	Translation	ko03010//Ribosome	K02911	GO:0043231//intracellular membrane-bounded organelle;GO:0043226//organelle;GO:0043228//non-membrane-bounded organelle;GO:0005622//intracellular;GO:0044444//cytoplasmic part;GO:0043229//intracellular organelle;GO:0044424//intracellular part;GO:0005739//mitochondrion;GO:0030529//intracellular ribonucleoprotein complex;GO:0005575//cellular_component;GO:0032991//macromolecular complex;GO:0005623//cel…	GO:0005198//structural molecule activity;GO:0003674//molecular_function;GO:0003735//structural constituent of ribosome	GO:0009058//biosynthetic process;GO:0043603//cellular amide metabolic process;GO:0008152//metabolic process;GO:0044271//cellular nitrogen compound biosynthetic process;GO:0006412//translation;GO:1901564//organonitrogen compound metabolic process;GO:0044238//primary metabolic process;GO:0044267//cellular protein metabolic process;GO:0044249//cellular biosynthetic process;GO:0009987//cellular proce…
ENSG00000106628	4414.33	1838	167.767	118.623	-1.21285	0.00680738	0.0497037	down	POLD2	polymerase (DNA directed), delta 2, accessory subunit [Source:HGNC Symbol;Acc:9176]	Genetic Information Processing;Metabolism;Human Diseases	Replication and repair;Nucleotide metabolism;Infectious diseases	ko05166//HTLV-I infection;ko00230//Purine metabolism;ko00240//Pyrimidine metabolism;ko03420//Nucleotide excision repair;ko03030//DNA replication;ko03410//Base excision repair;ko03440//Homologous recombination;ko03430//Mismatch repair	K02328	GO:0044464//cell part;GO:0005634//nucleus;GO:0044446//intracellular organelle part;GO:0005622//intracellular;GO:0043227//membrane-bounded organelle;GO:0031974//membrane-enclosed lumen;GO:0005654//nucleoplasm;GO:0043233//organelle lumen;GO:0043231//intracellular membrane-bounded organelle;GO:0044422//organelle part;GO:0044424//intracellular part;GO:0005623//cell;GO:0031981//nuclear lumen;GO:004442…	GO:0003677//DNA binding;GO:0016740//transferase activity;GO:0005488//binding;GO:0003824//catalytic activity;GO:0003674//molecular_function;GO:0016772//transferase activity, transferring phosphorus-containing groups;GO:0016779//nucleotidyltransferase activity;GO:1901363//heterocyclic compound binding;GO:0003676//nucleic acid binding;GO:0097159//organic cyclic compound binding	GO:0006807//nitrogen compound metabolic process;GO:0071840//cellular component organization or biogenesis;GO:0044699//single-organism process;GO:0006996//organelle organization;GO:0006259//DNA metabolic process;GO:0006139//nucleobase-containing compound metabolic process;GO:0009058//biosynthetic process;GO:0009987//cellular process;GO:0006950//response to stress;GO:0034641//cellular nitrogen comp…
ENSG00000106633	0	3.66667	0.001	0.13	4.91474	0.00624077	0.0469498	up	GCK	glucokinase (hexokinase 4) [Source:HGNC Symbol;Acc:4195]	Organismal Systems;Human Diseases;Metabolism	Endocrine and metabolic diseases;Global and Overview;Carbohydrate metabolism;Cancers;Biosynthesis of other secondary metabolites;Endocrine system	ko04910//Insulin signaling pathway;ko01200//Carbon metabolism;ko04922//Glucagon signaling pathway;ko04911//Insulin secretion;ko04917//Prolactin signaling pathway;ko05230//Central carbon metabolism in cancer;ko00010//Glycolysis / Gluconeogenesis;ko00500//Starch and sucrose metabolism;ko04930//Type II diabetes mellitus;ko00520//Amino sugar and nucleotide sugar metabolism;ko00052//Galactose metaboli…	K12407	GO:0044444//cytoplasmic part;GO:0044446//intracellular organelle part;GO:0031410//cytoplasmic vesicle;GO:0044464//cell part;GO:0031974//membrane-enclosed lumen;GO:0031988//membrane-bounded vesicle;GO:0070013//intracellular organelle lumen;GO:0005575//cellular_component;GO:0016023//cytoplasmic, membrane-bounded vesicle;GO:0005737//cytoplasm;GO:0043233//organelle lumen;GO:0031982//vesicle;GO:004442…	GO:0005515//protein binding;GO:0016740//transferase activity;GO:0019899//enzyme binding;GO:0003824//catalytic activity;GO:0003674//molecular_function;GO:0016772//transferase activity, transferring phosphorus-containing groups;GO:0005488//binding;GO:0043167//ion binding;GO:0016301//kinase activity	GO:0042592//homeostatic process;GO:0044238//primary metabolic process;GO:0055085//transmembrane transport;GO:0009058//biosynthetic process;GO:0023052//signaling;GO:0050896//response to stimulus;GO:0032502//developmental process;GO:0007165//signal transduction;GO:0051179//localization;GO:0051716//cellular response to stimulus;GO:0008152//metabolic process;GO:0044763//single-organism cellular proce…
ENSG00000106635	2272.67	988	74.1833	39.94	-1.16756	0.00264869	0.0286856	down	BCL7B	-	-	-	-	-	GO:0005575//cellular_component	GO:0008092//cytoskeletal protein binding;GO:0005515//protein binding;GO:0003674//molecular_function;GO:0005488//binding	GO:0008150//biological_process
ENSG00000106688	35	104.333	0.493333	1.65	1.58602	0.00082954	0.0145635	up	SLC1A1	solute carrier family 1 (neuronal/epithelial high affinity glutamate transporter, system Xag), member 1 [Source:HGNC Symbol;Acc:10939]	Organismal Systems	Nervous system;Digestive system	ko04724//Glutamatergic synapse;ko04974//Protein digestion and absorption	K05612	GO:0005886//plasma membrane;GO:0044464//cell part;GO:0071944//cell periphery;GO:0005575//cellular_component;GO:0016020//membrane;GO:0005623//cell	GO:0005215//transporter activity;GO:0022857//transmembrane transporter activity;GO:0005488//binding;GO:0043167//ion binding;GO:0003674//molecular_function	GO:0071840//cellular component organization or biogenesis;GO:0051234//establishment of localization;GO:0070271//protein complex biogenesis;GO:0016043//cellular component organization;GO:0044700//single organism signaling;GO:0051179//localization;GO:0050877//neurological system process;GO:0071822//protein complex subunit organization;GO:0044699//single-organism process;GO:0009987//cellular process…
ENSG00000106701	237.667	584.333	3.28	7.51333	1.31419	0.00433728	0.0379213	up	FSD1L	fibronectin type III and SPRY domain containing 1-like [Source:HGNC Symbol;Acc:13753]	-	-	-	-	GO:0044464//cell part;GO:0005622//intracellular;GO:0005575//cellular_component;GO:0005623//cell	GO:0003674//molecular_function	GO:0008150//biological_process
ENSG00000106799	663	1588.67	6.28	18.96	1.28392	0.000892613	0.0152734	up	TGFBR1	transforming growth factor, beta receptor 1 [Source:HGNC Symbol;Acc:11772]	Organismal Systems;Cellular Processes;Environmental Information Processing;Human Diseases	Cellular commiunity;Signal transduction;Development;Transport and catabolism;Infectious diseases;Cancers;Signaling molecules and interaction	ko05200//Pathways in cancer;ko05166//HTLV-I infection;ko04144//Endocytosis;ko04060//Cytokine-cytokine receptor interaction;ko04010//MAPK signaling pathway;ko04380//Osteoclast differentiation;ko05161//Hepatitis B;ko04390//Hippo signaling pathway;ko04068//FoxO signaling pathway;ko05142//Chagas disease (American trypanosomiasis);ko04350//TGF-beta signaling pathway;ko04520//Adherens junction;ko05220/…	K04674	GO:0016020//membrane;GO:0005575//cellular_component;GO:0044464//cell part;GO:0005623//cell;GO:0071944//cell periphery;GO:0043234//protein complex;GO:0032991//macromolecular complex;GO:0005886//plasma membrane	GO:0003674//molecular_function;GO:0043167//ion binding;GO:0003824//catalytic activity;GO:0016772//transferase activity, transferring phosphorus-containing groups;GO:0016757//transferase activity, transferring glycosyl groups;GO:0016301//kinase activity;GO:0004871//signal transducer activity;GO:0016740//transferase activity;GO:0005488//binding	GO:0036211//protein modification process;GO:0007275//multicellular organism development;GO:0051674//localization of cell;GO:0050789//regulation of biological process;GO:0034641//cellular nitrogen compound metabolic process;GO:0030198//extracellular matrix organization;GO:0065007//biological regulation;GO:0044700//single organism signaling;GO:0008152//metabolic process;GO:0043062//extracellular st…
ENSG00000106803	2479.67	741.667	526.647	227.52	-1.69361	0.000315038	0.00877373	down	SEC61B	Sec61 beta subunit [Source:HGNC Symbol;Acc:16993]	Genetic Information Processing;Cellular Processes;Human Diseases	Infectious diseases;Transport and catabolism;Folding, sorting and degradation	ko04145//Phagosome;ko04141//Protein processing in endoplasmic reticulum;ko05110//Vibrio cholerae infection;ko03060//Protein export	K09481	GO:0043229//intracellular organelle;GO:0005737//cytoplasm;GO:0043234//protein complex;GO:0032991//macromolecular complex;GO:0044444//cytoplasmic part;GO:0043231//intracellular membrane-bounded organelle;GO:0005783//endoplasmic reticulum;GO:0005623//cell;GO:0012505//endomembrane system;GO:0005575//cellular_component;GO:0005622//intracellular;GO:0043226//organelle;GO:0043227//membrane-bounded organ…	GO:0003674//molecular_function	GO:0010467//gene expression;GO:0043170//macromolecule metabolic process;GO:0008150//biological_process;GO:0044260//cellular macromolecule metabolic process;GO:0051179//localization;GO:0009059//macromolecule biosynthetic process;GO:0033036//macromolecule localization;GO:0019538//protein metabolic process;GO:0006886//intracellular protein transport;GO:0006913//nucleocytoplasmic transport;GO:0008152…
ENSG00000106804	41	93	0.576667	1.37667	1.20483	0.00360551	0.0337827	up	C5	complement component 5 [Source:HGNC Symbol;Acc:1331]	Organismal Systems;Human Diseases	Immune system;Immune diseases;Infectious diseases;Neurodegenerative diseases	ko05322//Systemic lupus erythematosus;ko05168//Herpes simplex infection;ko05150//Staphylococcus aureus infection;ko05133//Pertussis;ko04610//Complement and coagulation cascades;ko05020//Prion diseases	K03994	GO:0005623//cell;GO:0044421//extracellular region part;GO:0016020//membrane;GO:0005615//extracellular space;GO:0044464//cell part;GO:0005575//cellular_component;GO:0005886//plasma membrane;GO:0032991//macromolecular complex;GO:0005576//extracellular region;GO:0071944//cell periphery;GO:0043234//protein complex	GO:0098772//molecular function regulator;GO:0030234//enzyme regulator activity;GO:0003674//molecular_function	GO:0032501//multicellular organismal process;GO:0065007//biological regulation;GO:0007154//cell communication;GO:0006928//movement of cell or subcellular component;GO:0048870//cell motility;GO:0048856//anatomical structure development;GO:0050896//response to stimulus;GO:0044700//single organism signaling;GO:0023052//signaling;GO:0007275//multicellular organism development;GO:0051716//cellular res…
ENSG00000106992	1617	404.67	137.353	39.07	-1.93439	0.000417164	0.0100091	down	AK1	adenylate kinase 1 [Source:HGNC Symbol;Acc:361]	Metabolism	Nucleotide metabolism	ko00230//Purine metabolism	K00939	GO:0005622//intracellular;GO:0005623//cell;GO:0005575//cellular_component;GO:0005886//plasma membrane;GO:0044444//cytoplasmic part;GO:0005929//cilium;GO:0044424//intracellular part;GO:0005829//cytosol;GO:0016020//membrane;GO:0043226//organelle;GO:0042995//cell projection;GO:0044464//cell part;GO:0005737//cytoplasm;GO:0071944//cell periphery	GO:0016772//transferase activity, transferring phosphorus-containing groups;GO:0003824//catalytic activity;GO:0016301//kinase activity;GO:0003674//molecular_function;GO:0016740//transferase activity;GO:0043167//ion binding;GO:0005488//binding	GO:0034641//cellular nitrogen compound metabolic process;GO:0044237//cellular metabolic process;GO:0007049//cell cycle;GO:0008152//metabolic process;GO:0044281//small molecule metabolic process;GO:0044763//single-organism cellular process;GO:0009987//cellular process;GO:0006807//nitrogen compound metabolic process;GO:0044699//single-organism process;GO:0009058//biosynthetic process;GO:0008150//bi…
ENSG00000107077	229.667	584.333	2.68	9.00333	1.36443	0.00171642	0.0223098	up	KDM4C	lysine (K)-specific demethylase 4C [Source:HGNC Symbol;Acc:17071]	-	-	-	-	GO:0043228//non-membrane-bounded organelle;GO:0005623//cell;GO:0000228//nuclear chromosome;GO:0031974//membrane-enclosed lumen;GO:0043233//organelle lumen;GO:0043231//intracellular membrane-bounded organelle;GO:0043227//membrane-bounded organelle;GO:0044424//intracellular part;GO:0005575//cellular_component;GO:0031981//nuclear lumen;GO:0044422//organelle part;GO:0043226//organelle;GO:0005634//nuc…	GO:0005488//binding;GO:0003674//molecular_function;GO:0043167//ion binding;GO:0005515//protein binding;GO:0003824//catalytic activity;GO:0019899//enzyme binding;GO:0016491//oxidoreductase activity	GO:0071840//cellular component organization or biogenesis;GO:0051276//chromosome organization;GO:0071704//organic substance metabolic process;GO:0044260//cellular macromolecule metabolic process;GO:0044267//cellular protein metabolic process;GO:0006807//nitrogen compound metabolic process;GO:0044281//small molecule metabolic process;GO:0006464//cellular protein modification process;GO:0009058//bi…
ENSG00000107104	223.367	672	3.32	7.57	1.60609	0.00136917	0.0193837	up	KANK1	KN motif and ankyrin repeat domains 1 [Source:HGNC Symbol;Acc:19309]	-	-	-	-	GO:0005737//cytoplasm;GO:0044424//intracellular part;GO:0043227//membrane-bounded organelle;GO:0043226//organelle;GO:0005575//cellular_component;GO:0071944//cell periphery;GO:0005623//cell;GO:0005886//plasma membrane;GO:0005634//nucleus;GO:0005622//intracellular;GO:0043231//intracellular membrane-bounded organelle;GO:0016020//membrane;GO:0043229//intracellular organelle;GO:0044464//cell part	GO:0003674//molecular_function	GO:0008150//biological_process;GO:0032502//developmental process;GO:0048869//cellular developmental process;GO:0044237//cellular metabolic process;GO:0044767//single-organism developmental process;GO:0048856//anatomical structure development;GO:0006807//nitrogen compound metabolic process;GO:0044763//single-organism cellular process;GO:0034641//cellular nitrogen compound metabolic process;GO:0030…
ENSG00000107159	32.5067	219.307	1.16667	9.5	2.78635	6.19341e-07	0.000110948	up	CA9	carbonic anhydrase IX [Source:HGNC Symbol;Acc:1383]	Metabolism	Energy metabolism	ko00910//Nitrogen metabolism	K01672	GO:0043226//organelle;GO:0005575//cellular_component;GO:0005730//nucleolus;GO:0044424//intracellular part;GO:0005634//nucleus;GO:0016020//membrane;GO:0031981//nuclear lumen;GO:0071944//cell periphery;GO:0005886//plasma membrane;GO:0031974//membrane-enclosed lumen;GO:0043227//membrane-bounded organelle;GO:0043228//non-membrane-bounded organelle;GO:0044464//cell part;GO:0044446//intracellular organ…	GO:0003674//molecular_function;GO:0005488//binding;GO:0016829//lyase activity;GO:0003824//catalytic activity;GO:0043167//ion binding	GO:0044710//single-organism metabolic process;GO:0051234//establishment of localization;GO:0044699//single-organism process;GO:0048856//anatomical structure development;GO:0006810//transport;GO:0008150//biological_process;GO:0050896//response to stimulus;GO:0051179//localization;GO:0044281//small molecule metabolic process;GO:0008152//metabolic process;GO:0032502//developmental process;GO:0006950…
ENSG00000107223	8886.33	1988.33	1110.31	367.733	-2.09239	0.000319951	0.00882364	down	EDF1	endothelial differentiation-related factor 1 [Source:HGNC Symbol;Acc:3164]	-	-	-	-	GO:0044464//cell part;GO:0043229//intracellular organelle;GO:0005623//cell;GO:0043234//protein complex;GO:0005654//nucleoplasm;GO:0032991//macromolecular complex;GO:0043231//intracellular membrane-bounded organelle;GO:0043228//non-membrane-bounded organelle;GO:0031981//nuclear lumen;GO:0005622//intracellular;GO:0044424//intracellular part;GO:0044428//nuclear part;GO:0044422//organelle part;GO:004…	GO:0003676//nucleic acid binding;GO:0003674//molecular_function;GO:0000988//transcription factor activity, protein binding;GO:0003677//DNA binding;GO:1901363//heterocyclic compound binding;GO:0097159//organic cyclic compound binding;GO:0005488//binding	GO:0044767//single-organism developmental process;GO:0006807//nitrogen compound metabolic process;GO:0048869//cellular developmental process;GO:0044763//single-organism cellular process;GO:0009987//cellular process;GO:0008150//biological_process;GO:0034641//cellular nitrogen compound metabolic process;GO:0009058//biosynthetic process;GO:0044699//single-organism process;GO:0048856//anatomical stru…
ENSG00000107262	4399	1530.33	190.22	85.1367	-1.472	0.000924301	0.0156002	down	BAG1	BCL2-associated athanogene [Source:HGNC Symbol;Acc:937]	Genetic Information Processing	Folding, sorting and degradation	ko04141//Protein processing in endoplasmic reticulum	K09555	GO:0044444//cytoplasmic part;GO:0044424//intracellular part;GO:0005575//cellular_component;GO:0005829//cytosol;GO:0043227//membrane-bounded organelle;GO:0005737//cytoplasm;GO:0005623//cell;GO:0005622//intracellular;GO:0043229//intracellular organelle;GO:0044464//cell part;GO:0043231//intracellular membrane-bounded organelle;GO:0005634//nucleus;GO:0043226//organelle	GO:0003674//molecular_function;GO:0004871//signal transducer activity	GO:0007154//cell communication;GO:0007165//signal transduction;GO:0065007//biological regulation;GO:0044763//single-organism cellular process;GO:0023052//signaling;GO:0008219//cell death;GO:0051716//cellular response to stimulus;GO:0044699//single-organism process;GO:0008150//biological_process;GO:0050794//regulation of cellular process;GO:0050789//regulation of biological process;GO:0030154//cel…
ENSG00000107281	2249.67	644.333	78.6167	30.4867	-1.7429	0.00155559	0.0209882	down	NPDC1	neural proliferation, differentiation and control, 1 [Source:HGNC Symbol;Acc:7899]	-	-	-	-	GO:0005575//cellular_component	-	-
ENSG00000107551	53.3333	131	1.08333	3.35	1.34909	0.00172771	0.0223976	up	RASSF4	-	-	-	-	-	-	GO:0003674//molecular_function	GO:0065007//biological regulation;GO:0007049//cell cycle;GO:0044699//single-organism process;GO:0007154//cell communication;GO:0023052//signaling;GO:0007165//signal transduction;GO:0044763//single-organism cellular process;GO:0009987//cellular process;GO:0044700//single organism signaling;GO:0050896//response to stimulus;GO:0008150//biological_process;GO:0051716//cellular response to stimulus;GO:…
ENSG00000107611	17	53.6667	0.0666667	0.246667	1.68479	0.00144327	0.0200254	up	CUBN	-	Organismal Systems	Digestive system	ko04977//Vitamin digestion and absorption	K14616	GO:0044464//cell part;GO:0097708//intracellular vesicle;GO:0016023//cytoplasmic, membrane-bounded vesicle;GO:0043226//organelle;GO:0005768//endosome;GO:0071944//cell periphery;GO:0012505//endomembrane system;GO:0005575//cellular_component;GO:0005623//cell;GO:0005773//vacuole;GO:0044444//cytoplasmic part;GO:0031410//cytoplasmic vesicle;GO:0031982//vesicle;GO:0005829//cytosol;GO:0005783//endoplasmi…	GO:0043167//ion binding;GO:0003674//molecular_function;GO:0005488//binding	GO:0044238//primary metabolic process;GO:0065007//biological regulation;GO:0071704//organic substance metabolic process;GO:0042592//homeostatic process;GO:0016192//vesicle-mediated transport;GO:0065008//regulation of biological quality;GO:0044710//single-organism metabolic process;GO:0051234//establishment of localization;GO:0008150//biological_process;GO:0008152//metabolic process;GO:0044281//sm…
ENSG00000107821	89.3333	28.3333	4.53	2.04333	-1.60595	0.00463653	0.0395328	down	KAZALD1	Kazal-type serine peptidase inhibitor domain 1 [Source:HGNC Symbol;Acc:25460]	-	-	-	-	GO:0031012//extracellular matrix;GO:0005575//cellular_component;GO:0005578//proteinaceous extracellular matrix;GO:0005576//extracellular region;GO:0044421//extracellular region part	GO:0003674//molecular_function	GO:0044767//single-organism developmental process;GO:0009987//cellular process;GO:0016043//cellular component organization;GO:0048869//cellular developmental process;GO:0032502//developmental process;GO:0071840//cellular component organization or biogenesis;GO:0030198//extracellular matrix organization;GO:0008150//biological_process;GO:0030154//cell differentiation;GO:0043062//extracellular struc…
ENSG00000107833	830.333	201.333	65.7633	21.9667	-1.99152	0.000232666	0.00758492	down	NPM3	nucleophosmin/nucleoplasmin 3 [Source:HGNC Symbol;Acc:7931]	-	-	-	-	GO:0044464//cell part;GO:0044424//intracellular part;GO:0043227//membrane-bounded organelle;GO:0005634//nucleus;GO:0031974//membrane-enclosed lumen;GO:0043232//intracellular non-membrane-bounded organelle;GO:0070013//intracellular organelle lumen;GO:0044428//nuclear part;GO:0031981//nuclear lumen;GO:0044422//organelle part;GO:0005730//nucleolus;GO:0043226//organelle;GO:0005623//cell;GO:0005622//i…	GO:0003674//molecular_function	GO:0009987//cellular process;GO:0044237//cellular metabolic process;GO:0006807//nitrogen compound metabolic process;GO:0022613//ribonucleoprotein complex biogenesis;GO:0034641//cellular nitrogen compound metabolic process;GO:0008152//metabolic process;GO:0009058//biosynthetic process;GO:0071840//cellular component organization or biogenesis;GO:0008150//biological_process;GO:0042254//ribosome biog…
ENSG00000107872	1007.33	223.74	32.6467	12.14	-2.09477	0.00100414	0.0164565	down	FBXL15	F-box and leucine-rich repeat protein 15 [Source:HGNC Symbol;Acc:28155]	-	-	-	-	GO:0044424//intracellular part;GO:0005575//cellular_component;GO:0005623//cell;GO:0044464//cell part;GO:0005622//intracellular;GO:0005737//cytoplasm;GO:0043234//protein complex;GO:0032991//macromolecular complex	GO:0003674//molecular_function;GO:0003824//catalytic activity;GO:0016874//ligase activity	GO:0008152//metabolic process;GO:0044699//single-organism process;GO:0044260//cellular macromolecule metabolic process;GO:0044763//single-organism cellular process;GO:0036211//protein modification process;GO:0044238//primary metabolic process;GO:0043170//macromolecule metabolic process;GO:0009056//catabolic process;GO:0043412//macromolecule modification;GO:0007049//cell cycle;GO:0009987//cellular…
ENSG00000107874	2340	878	112.28	62.0167	-1.35887	0.00604638	0.0461202	down	CUEDC2	CUE domain containing 2 [Source:HGNC Symbol;Acc:28352]	-	-	-	-	GO:0043227//membrane-bounded organelle;GO:0005737//cytoplasm;GO:0043231//intracellular membrane-bounded organelle;GO:0005575//cellular_component;GO:0043226//organelle;GO:0005623//cell;GO:0044464//cell part;GO:0043229//intracellular organelle;GO:0044424//intracellular part;GO:0005622//intracellular;GO:0005634//nucleus	GO:0003674//molecular_function	-
ENSG00000107890	70.6667	216.333	0.716667	2.13667	1.65703	0.00221113	0.0259114	up	ANKRD26	-	-	-	-	-	GO:0044446//intracellular organelle part;GO:0005856//cytoskeleton;GO:0044424//intracellular part;GO:0015630//microtubule cytoskeleton;GO:0044430//cytoskeletal part;GO:0005815//microtubule organizing center;GO:0043228//non-membrane-bounded organelle;GO:0043229//intracellular organelle;GO:0044464//cell part;GO:0044422//organelle part;GO:0005575//cellular_component;GO:0005622//intracellular;GO:00432…	GO:0003674//molecular_function	-
ENSG00000107957	87.6667	288.667	0.493333	2.00333	1.73494	0.000347638	0.00914405	up	SH3PXD2A	SH3 and PX domains 2A [Source:HGNC Symbol;Acc:23664]	-	-	-	-	GO:0043234//protein complex;GO:0043228//non-membrane-bounded organelle;GO:0044464//cell part;GO:0032991//macromolecular complex;GO:0043226//organelle;GO:0005856//cytoskeleton;GO:0043232//intracellular non-membrane-bounded organelle;GO:0005622//intracellular;GO:0043229//intracellular organelle;GO:0005575//cellular_component;GO:0044424//intracellular part;GO:0005737//cytoplasm;GO:0005623//cell	GO:0043167//ion binding;GO:0005488//binding;GO:0008289//lipid binding;GO:0003674//molecular_function	GO:0008150//biological_process
ENSG00000108106	17307	3041	1011.75	254.573	-2.4389	4.45143e-05	0.00307404	down	UBE2S	ubiquitin-conjugating enzyme E2S [Source:HGNC Symbol;Acc:17895]	Genetic Information Processing	Folding, sorting and degradation	ko04120//Ubiquitin mediated proteolysis	K10583	GO:0043227//membrane-bounded organelle;GO:0005575//cellular_component;GO:0043226//organelle;GO:0043229//intracellular organelle;GO:0044424//intracellular part;GO:0032991//macromolecular complex;GO:0005623//cell;GO:0044464//cell part;GO:0005622//intracellular;GO:0043234//protein complex;GO:0043231//intracellular membrane-bounded organelle;GO:0005634//nucleus	GO:0043167//ion binding;GO:0005488//binding;GO:0003824//catalytic activity;GO:0003674//molecular_function;GO:0016874//ligase activity	GO:0036211//protein modification process;GO:0044085//cellular component biogenesis;GO:0008150//biological_process;GO:0043412//macromolecule modification;GO:0071822//protein complex subunit organization;GO:0044267//cellular protein metabolic process;GO:0019538//protein metabolic process;GO:0000278//mitotic cell cycle;GO:0006461//protein complex assembly;GO:0008152//metabolic process;GO:0009987//ce…
ENSG00000108107	18587	3456	1619.61	463.21	-2.35154	9.69503e-05	0.00472809	down	RPL28	ribosomal protein L28 [Source:HGNC Symbol;Acc:10330]	Genetic Information Processing	Translation	ko03010//Ribosome	K02903	GO:0043226//organelle;GO:1990904//ribonucleoprotein complex;GO:0030529//intracellular ribonucleoprotein complex;GO:0044424//intracellular part;GO:0044464//cell part;GO:0043232//intracellular non-membrane-bounded organelle;GO:0005622//intracellular;GO:0005840//ribosome;GO:0005737//cytoplasm;GO:0032991//macromolecular complex;GO:0043229//intracellular organelle;GO:0044444//cytoplasmic part;GO:00432…	GO:1901363//heterocyclic compound binding;GO:0003676//nucleic acid binding;GO:0003735//structural constituent of ribosome;GO:0005198//structural molecule activity;GO:0003674//molecular_function;GO:0005488//binding;GO:0097159//organic cyclic compound binding;GO:0003723//RNA binding	GO:0034641//cellular nitrogen compound metabolic process;GO:0034613//cellular protein localization;GO:0044237//cellular metabolic process;GO:1901361//organic cyclic compound catabolic process;GO:0019439//aromatic compound catabolic process;GO:0044271//cellular nitrogen compound biosynthetic process;GO:0034645//cellular macromolecule biosynthetic process;GO:0045184//establishment of protein locali…
ENSG00000108294	10668.3	2619	1026.07	356.613	-1.96624	0.000249811	0.00784883	down	PSMB3	proteasome (prosome, macropain) subunit, beta type, 3 [Source:HGNC Symbol;Acc:9540]	Genetic Information Processing	Folding, sorting and degradation	ko03050//Proteasome	K02735	GO:0031974//membrane-enclosed lumen;GO:0031981//nuclear lumen;GO:0005623//cell;GO:0043227//membrane-bounded organelle;GO:0043231//intracellular membrane-bounded organelle;GO:0044464//cell part;GO:0005737//cytoplasm;GO:0005654//nucleoplasm;GO:0005634//nucleus;GO:0044428//nuclear part;GO:0043233//organelle lumen;GO:0070013//intracellular organelle lumen;GO:0044446//intracellular organelle part;GO:0…	GO:0003674//molecular_function;GO:0016787//hydrolase activity;GO:0003824//catalytic activity;GO:0008233//peptidase activity	GO:0065007//biological regulation;GO:0044710//single-organism metabolic process;GO:0044281//small molecule metabolic process;GO:0006464//cellular protein modification process;GO:0008219//cell death;GO:0009056//catabolic process;GO:0006950//response to stress;GO:0019538//protein metabolic process;GO:0050789//regulation of biological process;GO:0007165//signal transduction;GO:0044260//cellular macr…
ENSG00000108298	48897.7	16029.3	5196.52	2372.19	-1.55575	0.00126051	0.0185752	down	RPL19	ribosomal protein L19 [Source:HGNC Symbol;Acc:10312]	Genetic Information Processing	Translation	ko03010//Ribosome	K02885	GO:0005840//ribosome;GO:0005623//cell;GO:0044464//cell part;GO:0043232//intracellular non-membrane-bounded organelle;GO:0032991//macromolecular complex;GO:0005737//cytoplasm;GO:0005575//cellular_component;GO:0044424//intracellular part;GO:0043226//organelle;GO:0030529//intracellular ribonucleoprotein complex;GO:0044444//cytoplasmic part;GO:1990904//ribonucleoprotein complex;GO:0005829//cytosol;GO…	GO:1901363//heterocyclic compound binding;GO:0003674//molecular_function;GO:0003735//structural constituent of ribosome;GO:0005198//structural molecule activity;GO:0097159//organic cyclic compound binding;GO:0005488//binding;GO:0003676//nucleic acid binding;GO:0003723//RNA binding	GO:0044238//primary metabolic process;GO:1901575//organic substance catabolic process;GO:0044271//cellular nitrogen compound biosynthetic process;GO:0034613//cellular protein localization;GO:0071704//organic substance metabolic process;GO:0046907//intracellular transport;GO:0061024//membrane organization;GO:0034641//cellular nitrogen compound metabolic process;GO:0051234//establishment of localiz…
ENSG00000108342	7.66667	0	0.3	0.001	-5.92976	8.61948e-05	0.00436727	down	CSF3	-	Organismal Systems;Environmental Information Processing;Human Diseases	Immune system;Signal transduction;Infectious diseases;Signaling molecules and interaction	ko04151//PI3K-Akt signaling pathway;ko04060//Cytokine-cytokine receptor interaction;ko04630//Jak-STAT signaling pathway;ko04640//Hematopoietic cell lineage;ko05144//Malaria	K05423	GO:0005575//cellular_component;GO:0044421//extracellular region part;GO:0005576//extracellular region;GO:0005615//extracellular space	GO:0005488//binding;GO:0003674//molecular_function;GO:0005515//protein binding;GO:0019899//enzyme binding	GO:0050789//regulation of biological process;GO:0051716//cellular response to stimulus;GO:0050896//response to stimulus;GO:0007165//signal transduction;GO:0044767//single-organism developmental process;GO:0002376//immune system process;GO:0030154//cell differentiation;GO:0065007//biological regulation;GO:0044763//single-organism cellular process;GO:0032502//developmental process;GO:0007154//cell …
ENSG00000108389	402	1017.67	4.53333	13.88	1.36104	0.00043518	0.0102924	up	MTMR4	myotubularin related protein 4 [Source:HGNC Symbol;Acc:7452]	Environmental Information Processing;Metabolism	Signal transduction;Carbohydrate metabolism	ko04070//Phosphatidylinositol signaling system;ko00562//Inositol phosphate metabolism	K18082	GO:0044464//cell part;GO:0005622//intracellular;GO:0043226//organelle;GO:0005623//cell;GO:0043229//intracellular organelle;GO:0043231//intracellular membrane-bounded organelle;GO:0044444//cytoplasmic part;GO:0012505//endomembrane system;GO:0043227//membrane-bounded organelle;GO:0005575//cellular_component;GO:0005773//vacuole;GO:0005737//cytoplasm;GO:0044424//intracellular part;GO:0005829//cytosol…	GO:0005488//binding;GO:0016787//hydrolase activity;GO:0042578//phosphoric ester hydrolase activity;GO:0016788//hydrolase activity, acting on ester bonds;GO:0043167//ion binding;GO:0016791//phosphatase activity;GO:0003824//catalytic activity;GO:0003674//molecular_function	GO:0009058//biosynthetic process;GO:0044763//single-organism cellular process;GO:0007165//signal transduction;GO:0044699//single-organism process;GO:0043170//macromolecule metabolic process;GO:0006629//lipid metabolic process;GO:0044700//single organism signaling;GO:0050789//regulation of biological process;GO:0050794//regulation of cellular process;GO:0008150//biological_process;GO:0044238//prim…
ENSG00000108479	1387	408.667	55.1567	21.76	-1.70138	0.00131288	0.0189425	down	GALK1	-	Metabolism	Carbohydrate metabolism	ko00520//Amino sugar and nucleotide sugar metabolism;ko00052//Galactose metabolism	K00849	GO:0005829//cytosol;GO:0005575//cellular_component;GO:0005623//cell;GO:0044424//intracellular part;GO:0044444//cytoplasmic part;GO:0005622//intracellular;GO:0005737//cytoplasm;GO:0044464//cell part	GO:0003674//molecular_function;GO:0043167//ion binding;GO:0016301//kinase activity;GO:0005488//binding;GO:0016772//transferase activity, transferring phosphorus-containing groups;GO:0003824//catalytic activity;GO:0016740//transferase activity	GO:0044281//small molecule metabolic process;GO:0044710//single-organism metabolic process;GO:0044699//single-organism process;GO:0044238//primary metabolic process;GO:0008152//metabolic process;GO:0009056//catabolic process;GO:0008150//biological_process;GO:0071704//organic substance metabolic process;GO:0005975//carbohydrate metabolic process
ENSG00000108518	44899.7	12994.3	2596.88	1243.62	-1.73715	0.000455167	0.0105505	down	PFN1	profilin 1 [Source:HGNC Symbol;Acc:8881]	Cellular Processes;Environmental Information Processing;Human Diseases	Signal transduction;Cell motility;Infectious diseases	ko04810//Regulation of actin cytoskeleton;ko04015//Rap1 signaling pathway;ko05132//Salmonella infection;ko05131//Shigellosis	K05759	GO:0043227//membrane-bounded organelle;GO:0005622//intracellular;GO:0005575//cellular_component;GO:0043228//non-membrane-bounded organelle;GO:0005737//cytoplasm;GO:0043232//intracellular non-membrane-bounded organelle;GO:0005856//cytoskeleton;GO:0043229//intracellular organelle;GO:0044424//intracellular part;GO:0005634//nucleus;GO:0044464//cell part;GO:0005623//cell;GO:0043226//organelle;GO:00432…	GO:0019899//enzyme binding;GO:0005515//protein binding;GO:0005488//binding;GO:0008092//cytoskeletal protein binding;GO:0003674//molecular_function	GO:0006996//organelle organization;GO:0007010//cytoskeleton organization;GO:0007275//multicellular organism development;GO:0006950//response to stress;GO:0006810//transport;GO:0044699//single-organism process;GO:0044767//single-organism developmental process;GO:0009790//embryo development;GO:0071840//cellular component organization or biogenesis;GO:0044763//single-organism cellular process;GO:005…
ENSG00000108551	93	1	2.80333	0.0533333	-6.31759	9.34911e-18	2.41648e-14	down	RASD1	RAS, dexamethasone-induced 1 [Source:HGNC Symbol;Acc:15828]	Organismal Systems	Environmental adaptation	ko04713//Circadian entrainment	K07843	GO:0043231//intracellular membrane-bounded organelle;GO:0005622//intracellular;GO:0043229//intracellular organelle;GO:0044464//cell part;GO:0043227//membrane-bounded organelle;GO:0016020//membrane;GO:0071944//cell periphery;GO:0044424//intracellular part;GO:0005634//nucleus;GO:0005575//cellular_component;GO:0005886//plasma membrane;GO:0043226//organelle;GO:0005737//cytoplasm;GO:0005623//cell	GO:0005488//binding;GO:0017111//nucleoside-triphosphatase activity;GO:0003674//molecular_function;GO:0003824//catalytic activity;GO:0003924//GTPase activity;GO:0043167//ion binding;GO:0016787//hydrolase activity;GO:0016818//hydrolase activity, acting on acid anhydrides, in phosphorus-containing anhydrides;GO:0016462//pyrophosphatase activity;GO:0016817//hydrolase activity, acting on acid anhydrid…	GO:0065007//biological regulation;GO:0009056//catabolic process;GO:0006139//nucleobase-containing compound metabolic process;GO:0051649//establishment of localization in cell;GO:0044248//cellular catabolic process;GO:0006913//nucleocytoplasmic transport;GO:0044763//single-organism cellular process;GO:0008152//metabolic process;GO:0044700//single organism signaling;GO:0050794//regulation of cellul…
ENSG00000108622	15.6933	3.66667	0.983333	0.263333	-2.08645	0.00614729	0.0464978	down	ICAM2	-	Organismal Systems;Environmental Information Processing	Immune system;Signaling molecules and interaction	ko04650//Natural killer cell mediated cytotoxicity;ko04514//Cell adhesion molecules (CAMs)	K06523	GO:0016020//membrane;GO:0005575//cellular_component;GO:0005886//plasma membrane;GO:0044464//cell part;GO:0005623//cell;GO:0071944//cell periphery	GO:0003674//molecular_function	GO:0022610//biological adhesion;GO:0007155//cell adhesion;GO:0008150//biological_process
ENSG00000108799	376.333	796	6.53333	18.08	1.12271	0.00208391	0.0250693	up	EZH1	-	-	-	-	-	GO:0005654//nucleoplasm;GO:0070013//intracellular organelle lumen;GO:0005623//cell;GO:0044428//nuclear part;GO:0043226//organelle;GO:0031974//membrane-enclosed lumen;GO:0044422//organelle part;GO:0044446//intracellular organelle part;GO:0005575//cellular_component;GO:0043233//organelle lumen;GO:0031981//nuclear lumen;GO:0043227//membrane-bounded organelle;GO:0043229//intracellular organelle;GO:00…	GO:0003676//nucleic acid binding;GO:0016740//transferase activity;GO:0097159//organic cyclic compound binding;GO:0003674//molecular_function;GO:0005488//binding;GO:0003824//catalytic activity;GO:0008168//methyltransferase activity;GO:0003677//DNA binding;GO:0016741//transferase activity, transferring one-carbon groups;GO:1901363//heterocyclic compound binding	GO:0009058//biosynthetic process;GO:0034641//cellular nitrogen compound metabolic process;GO:0032502//developmental process;GO:0009987//cellular process;GO:0044237//cellular metabolic process;GO:0006807//nitrogen compound metabolic process;GO:0048856//anatomical structure development;GO:0008152//metabolic process;GO:0008150//biological_process
ENSG00000108826	2204.67	454.333	232.85	65.7833	-2.21302	7.69412e-05	0.00419018	down	MRPL27	mitochondrial ribosomal protein L27 [Source:HGNC Symbol;Acc:14483]	Genetic Information Processing	Translation	ko03010//Ribosome	K02899	GO:0044464//cell part;GO:0005575//cellular_component;GO:0043228//non-membrane-bounded organelle;GO:0043232//intracellular non-membrane-bounded organelle;GO:0032991//macromolecular complex;GO:0044424//intracellular part;GO:0005737//cytoplasm;GO:0005622//intracellular;GO:0005840//ribosome;GO:0030529//intracellular ribonucleoprotein complex;GO:0005623//cell;GO:1990904//ribonucleoprotein complex;GO:0…	GO:0003735//structural constituent of ribosome;GO:0003674//molecular_function;GO:0005198//structural molecule activity	GO:0034641//cellular nitrogen compound metabolic process;GO:0009059//macromolecule biosynthetic process;GO:0008152//metabolic process;GO:0008150//biological_process;GO:0044249//cellular biosynthetic process;GO:1901564//organonitrogen compound metabolic process;GO:0006518//peptide metabolic process;GO:0044267//cellular protein metabolic process;GO:0044271//cellular nitrogen compound biosynthetic p…
ENSG00000108961	855.817	232.68	49.7367	18.4433	-1.82973	0.0006771	0.0131446	down	RANGRF	RAN guanine nucleotide release factor [Source:HGNC Symbol;Acc:17679]	-	-	-	-	GO:0005623//cell;GO:0043227//membrane-bounded organelle;GO:0044446//intracellular organelle part;GO:0016020//membrane;GO:0043233//organelle lumen;GO:0044424//intracellular part;GO:0043229//intracellular organelle;GO:0005622//intracellular;GO:0005575//cellular_component;GO:0043231//intracellular membrane-bounded organelle;GO:0031974//membrane-enclosed lumen;GO:0012505//endomembrane system;GO:00444…	GO:0022892//substrate-specific transporter activity;GO:0003674//molecular_function;GO:0019899//enzyme binding;GO:0005215//transporter activity;GO:0005488//binding;GO:0008565//protein transporter activity;GO:0005515//protein binding	GO:0008150//biological_process;GO:0051179//localization;GO:0006810//transport;GO:0051234//establishment of localization;GO:0016192//vesicle-mediated transport
ENSG00000109016	290.667	124	13.11	7.33667	-1.18987	0.00451978	0.038904	down	DHRS7B	-	-	-	-	-	GO:0044424//intracellular part;GO:0043227//membrane-bounded organelle;GO:0005623//cell;GO:0043229//intracellular organelle;GO:0005737//cytoplasm;GO:0044444//cytoplasmic part;GO:0043231//intracellular membrane-bounded organelle;GO:0005622//intracellular;GO:0044464//cell part;GO:0043226//organelle;GO:0042579//microbody;GO:0005575//cellular_component;GO:0005777//peroxisome	GO:0003674//molecular_function;GO:0003824//catalytic activity;GO:0016491//oxidoreductase activity	GO:0008150//biological_process
[truncated: 2,074 more rows]

## Sheet: OGD-R vs. OGD
id	OGD_count	OGD_R_count	OGD_fpkm	OGD_R_fpkm	log2(FC)	Pvalue	FDR	significant	Symbol	Description	KEGG_A_class	KEGG_B_class	Pathway	K_ID	GO Component	GO Function	GO Process
[truncated: 390 more rows]
