# Supplementary material for: Integrated transcriptomic and proteomic profiling reveals the key molecular signatures of brain endothelial reperfusion injury
Source: Research Square preprint supplement (doi:10.21203/rs.3.rs-2216319/v1), 2022-11-02
Supplement: Supplementary file 4 [file 6b5103919fd94135fa6a48ba.xlsx]

## Sheet: OGD-R vs. OGD
id	term	ListHits	ListTotal	PopHits	PopTotal	pval	padj	Enrichment_score	Protein_Gene
hsa00532	Glycosaminoglycan biosynthesis - chondroitin sulfate / dermatan sulfate	1	93	1	2760	0	0	29.6774	Q8IZ52:CHPF
hsa04512	ECM-receptor interaction	7	93	28	2760	2.19e-06	0.000186545	7.41935	P02462:COL4A1; Q13683:ITGA7; P05106:ITGB3; Q16363:LAMA4; P56199:ITGA1; P07996:THBS1; P98160:HSPG2
hsa02010	ABC transporters	3	93	8	2760	7.63e-05	0.0043239	11.129	P33897:ABCD1; Q99758:ABCA3; O75027:ABCB7
hsa05150	Staphylococcus aureus infection	2	93	4	2760	0.000144661	0.0061481	14.8387	P13645:KRT10; P02679:FGG
hsa04977	Vitamin digestion and absorption	2	93	5	2760	0.000352811	0.010892	11.871	P04114:APOB; Q9Y289:SLC5A6
hsa04623	Cytosolic DNA-sensing pathway	5	93	30	2760	0.000384423	0.010892	4.94624	Q8N884:CGAS; P62875:POLR2L; Q9Y535:POLR3H; P25963:NFKBIA; Q15653:NFKBIB
hsa00563	Glycosylphosphatidylinositol (GPI)-anchor biosynthesis	1	93	2	2760	0.0011236	0.0272873	14.8387	Q969N2:PIGT
hsa04151	PI3K-Akt signaling pathway	10	93	116	2760	0.0014766	0.0313778	2.5584	P02462:COL4A1; Q13541:EIF4EBP1; Q13683:ITGA7; P05106:ITGB3; Q66LE6:PPP2R2D; Q16363:LAMA4; P56199:ITGA1; P07996:THBS1; Q15831:STK11; P22736:NR4A1
hsa04979	Cholesterol metabolism	3	93	19	2760	0.00317506	0.0560429	4.68591	P04114:APOB; Q8NBP7:PCSK9; Q99523:SORT1
hsa00130	Ubiquinone and other terpenoid-quinone biosynthesis	1	93	3	2760	0.00329664	0.0560429	9.89247	P15559:NQO1
hsa05412	Arrhythmogenic right ventricular cardiomyopathy (ARVC)	3	93	22	2760	0.00554572	0.0857066	4.04692	Q13683:ITGA7; P05106:ITGB3; P56199:ITGA1
hsa04610	Complement and coagulation cascades	2	93	12	2760	0.00653352	0.0925581	4.94624	P02679:FGG; P05121:SERPINE1
hsa04640	Hematopoietic cell lineage	2	93	13	2760	0.0082883	0.100989	4.56576	P05106:ITGB3; P56199:ITGA1
hsa05410	Hypertrophic cardiomyopathy (HCM)	3	93	26	2760	0.010226	0.100989	3.42432	Q13683:ITGA7; P05106:ITGB3; P56199:ITGA1
hsa05414	Dilated cardiomyopathy (DCM)	3	93	26	2760	0.010226	0.100989	3.42432	Q13683:ITGA7; P05106:ITGB3; P56199:ITGA1
hsa00900	Terpenoid backbone biosynthesis	2	93	14	2760	0.0102942	0.100989	4.23963	Q9UHG3:PCYOX1; Q86YH6:PDSS2
hsa04060	Cytokine-cytokine receptor interaction	1	93	5	2760	0.0105125	0.100989	5.93548	Q9NP84:TNFRSF12A
hsa04928	Parathyroid hormone synthesis, secretion and action	4	93	41	2760	0.0111915	0.100989	2.89536	Q14814:MEF2D; P10398:ARAF; Q13950:RUNX2; Q03113:GNA12
hsa04726	Serotonergic synapse	3	93	27	2760	0.0117004	0.100989	3.29749	P05067:APP; P10398:ARAF; P28562:DUSP1
hsa04810	Regulation of actin cytoskeleton	8	93	112	2760	0.011881	0.100989	2.11982	P53671:LIMK2; Q13683:ITGA7; P98174:FGD1; P05106:ITGB3; P10398:ARAF; P56199:ITGA1; Q96F07:CYFIP2; Q03113:GNA12
hsa04975	Fat digestion and absorption	1	93	6	2760	0.0154245	0.11919	4.94624	P04114:APOB
hsa05144	Malaria	1	93	6	2760	0.0154245	0.11919	4.94624	P07996:THBS1
hsa04920	Adipocytokine signaling pathway	3	93	33	2760	0.0234016	0.171893	2.69795	P25963:NFKBIA; Q15653:NFKBIB; Q15831:STK11
hsa05219	Bladder cancer	2	93	19	2760	0.0242672	0.171893	3.12394	P10398:ARAF; P07996:THBS1
hsa00511	Other glycan degradation	1	93	8	2760	0.0275541	0.187368	3.70968	P04066:FUCA1
hsa00310	Lysine degradation	3	93	36	2760	0.0312116	0.199817	2.47312	Q8IUZ5:PHYKPL; A2RU49:HYKK; Q9BZ95:NSD3
hsa05140	Leishmaniasis	2	93	21	2760	0.0317357	0.199817	2.82642	P25963:NFKBIA; Q15653:NFKBIB
hsa04650	Natural killer cell mediated cytotoxicity	3	93	39	2760	0.0403896	0.245223	2.28288	Q29983:MICA; P10398:ARAF; Q9BZM5:ULBP2
hsa05143	African trypanosomiasis	1	93	10	2760	0.0423886	0.248485	2.96774	Q16363:LAMA4
hsa03020	RNA polymerase	2	93	24	2760	0.04493	0.254603	2.47312	P62875:POLR2L; Q9Y535:POLR3H
hsa04510	Focal adhesion	6	93	99	2760	0.0470528	0.258031	1.79863	P02462:COL4A1; Q13683:ITGA7; P05106:ITGB3; Q16363:LAMA4; P56199:ITGA1; P07996:THBS1
hsa00590	Arachidonic acid metabolism	1	93	11	2760	0.0506924	0.261672	2.69795	Q8TED1:GPX8
hsa05165	Human papillomavirus infection	8	93	144	2760	0.0507952	0.261672	1.64875	P02462:COL4A1; Q13541:EIF4EBP1; Q13683:ITGA7; P05106:ITGB3; Q66LE6:PPP2R2D; Q16363:LAMA4; P56199:ITGA1; P07996:THBS1
hsa04730	Long-term depression	2	93	26	2760	0.055014	0.27507	2.28288	P10398:ARAF; Q03113:GNA12
hsa05211	Renal cell carcinoma	3	93	44	2760	0.0587575	0.285394	2.02346	Q8NFG4:FLCN; P14921:ETS1; P10398:ARAF
hsa04722	Neurotrophin signaling pathway	4	93	64	2760	0.062333	0.286502	1.85484	P00519:ABL1; P25963:NFKBIA; Q15653:NFKBIB; Q99523:SORT1
hsa05220	Chronic myeloid leukemia	3	93	46	2760	0.0671689	0.286502	1.93548	P00519:ABL1; P10398:ARAF; P25963:NFKBIA
hsa05142	Chagas disease (American trypanosomiasis)	3	93	46	2760	0.0671689	0.286502	1.93548	Q66LE6:PPP2R2D; P05121:SERPINE1; P25963:NFKBIA
hsa00450	Selenocompound metabolism	1	93	13	2760	0.0688398	0.286502	2.28288	Q99611:SEPHS2
hsa04360	Axon guidance	4	93	68	2760	0.0768326	0.286502	1.74573	P00519:ABL1; P53671:LIMK2; O14786:NRP1; Q9UIW2:PLXNA1
hsa05221	Acute myeloid leukemia	2	93	30	2760	0.0780891	0.286502	1.97849	Q13541:EIF4EBP1; P10398:ARAF
hsa04658	Th1 and Th2 cell differentiation	2	93	30	2760	0.0780891	0.286502	1.97849	P25963:NFKBIA; Q15653:NFKBIB
hsa04974	Protein digestion and absorption	1	93	14	2760	0.0785974	0.286502	2.11982	P02462:COL4A1
hsa00600	Sphingolipid metabolism	1	93	14	2760	0.0785974	0.286502	2.11982	Q16739:UGCG
hsa04142	Lysosome	4	93	69	2760	0.0807216	0.286502	1.72043	O00189:AP4M1; Q9GZU1:MCOLN1; Q99523:SORT1; P04066:FUCA1
hsa05222	Small cell lung cancer	3	93	49	2760	0.0808947	0.286502	1.81698	P02462:COL4A1; Q16363:LAMA4; P25963:NFKBIA
hsa04012	ErbB signaling pathway	3	93	49	2760	0.0808947	0.286502	1.81698	P00519:ABL1; Q13541:EIF4EBP1; P10398:ARAF
hsa04380	Osteoclast differentiation	3	93	49	2760	0.0808947	0.286502	1.81698	P05106:ITGB3; P25963:NFKBIA; P17275:JUNB
hsa05131	Shigellosis	3	93	50	2760	0.0857583	0.297529	1.78065	P00519:ABL1; P25963:NFKBIA; Q15653:NFKBIB
hsa05145	Toxoplasmosis	3	93	51	2760	0.0907624	0.308592	1.74573	Q16363:LAMA4; P25963:NFKBIA; Q15653:NFKBIB
hsa05032	Morphine addiction	1	93	16	2760	0.0992821	0.311683	1.85484	P34947:GRK5
hsa00240	Pyrimidine metabolism	2	93	34	2760	0.104692	0.311683	1.74573	O75356:ENTPD5; Q02127:DHODH
hsa04115	p53 signaling pathway	2	93	34	2760	0.104692	0.311683	1.74573	P05121:SERPINE1; P07996:THBS1
hsa04622	RIG-I-like receptor signaling pathway	2	93	34	2760	0.104692	0.311683	1.74573	P25963:NFKBIA; Q15653:NFKBIB
hsa05200	Pathways in cancer	9	93	191	2760	0.105708	0.311683	1.39841	P02462:COL4A1; P00519:ABL1; P14921:ETS1; P10398:ARAF; Q16363:LAMA4; P25963:NFKBIA; Q13772:NCOA4; P15559:NQO1; Q03113:GNA12
hsa05168	Herpes simplex virus 1 infection	5	93	97	2760	0.106098	0.311683	1.52976	Q8N884:CGAS; Q13541:EIF4EBP1; P05106:ITGB3; P25963:NFKBIA; Q05823:RNASEL
hsa04915	Estrogen signaling pathway	3	93	54	2760	0.106593	0.311683	1.64875	P13645:KRT10; P08779:KRT16; P02533:KRT14
hsa00510	N-Glycan biosynthesis	1	93	17	2760	0.110136	0.311683	1.74573	P33908:MAN1A1
hsa05216	Thyroid cancer	1	93	17	2760	0.110136	0.311683	1.74573	Q13772:NCOA4
hsa04927	Cortisol synthesis and secretion	1	93	17	2760	0.110136	0.311683	1.74573	P22736:NR4A1
hsa00970	Aminoacyl-tRNA biosynthesis	2	93	35	2760	0.111839	0.311683	1.69585	Q5ST30:VARS2; P49590:HARS2
hsa05146	Amoebiasis	2	93	36	2760	0.119169	0.326754	1.64875	P02462:COL4A1; Q16363:LAMA4
hsa04659	Th17 cell differentiation	2	93	37	2760	0.126674	0.335862	1.60418	P25963:NFKBIA; Q15653:NFKBIB
hsa04662	B cell receptor signaling pathway	2	93	37	2760	0.126674	0.335862	1.60418	P25963:NFKBIA; Q15653:NFKBIB
hsa04514	Cell adhesion molecules (CAMs)	1	93	19	2760	0.1327	0.335862	1.56197	Q92896:GLG1
hsa04330	Notch signaling pathway	1	93	19	2760	0.1327	0.335862	1.56197	Q86UW9:DTX2
hsa01521	EGFR tyrosine kinase inhibitor resistance	2	93	38	2760	0.134345	0.335862	1.56197	Q13541:EIF4EBP1; P10398:ARAF
hsa04270	Vascular smooth muscle contraction	2	93	38	2760	0.134345	0.335862	1.56197	P10398:ARAF; Q03113:GNA12
hsa04218	Cellular senescence	4	93	82	2760	0.140366	0.344061	1.44768	P14921:ETS1; Q13541:EIF4EBP1; Q99638:RAD9A; P05121:SERPINE1
hsa04152	AMPK signaling pathway	3	93	60	2760	0.141672	0.344061	1.48387	Q13541:EIF4EBP1; Q66LE6:PPP2R2D; Q15831:STK11
hsa05160	Hepatitis C	4	93	83	2760	0.145604	0.348628	1.43024	Q66LE6:PPP2R2D; P10398:ARAF; P25963:NFKBIA; Q05823:RNASEL
hsa05163	Human cytomegalovirus infection	5	93	108	2760	0.154073	0.354349	1.37395	Q8N884:CGAS; Q13541:EIF4EBP1; P05106:ITGB3; P25963:NFKBIA; Q03113:GNA12
hsa05418	Fluid shear stress and atherosclerosis	3	93	62	2760	0.154283	0.354349	1.436	P05106:ITGB3; P15559:NQO1; P28562:DUSP1
hsa05416	Viral myocarditis	1	93	21	2760	0.156202	0.354349	1.41321	P00519:ABL1
hsa04621	NOD-like receptor signaling pathway	4	93	85	2760	0.156331	0.354349	1.39658	Q96RD7:PANX1; P25963:NFKBIA; Q15653:NFKBIB; Q05823:RNASEL
hsa03410	Base excision repair	1	93	22	2760	0.168235	0.366667	1.34897	Q9UBZ4:APEX2
hsa04216	Ferroptosis	1	93	22	2760	0.168235	0.366667	1.34897	Q13772:NCOA4
hsa04130	SNARE interactions in vesicular transport	1	93	22	2760	0.168235	0.366667	1.34897	Q96AJ9:VTI1A
hsa04918	Thyroid hormone synthesis	1	93	23	2760	0.180422	0.384008	1.29032	Q8TED1:GPX8
hsa04062	Chemokine signaling pathway	3	93	66	2760	0.18071	0.384008	1.34897	P34947:GRK5; P25963:NFKBIA; Q15653:NFKBIB
hsa04211	Longevity regulating pathway	2	93	45	2760	0.192021	0.398093	1.319	Q13541:EIF4EBP1; Q15831:STK11
hsa05215	Prostate cancer	2	93	45	2760	0.192021	0.398093	1.319	P10398:ARAF; P25963:NFKBIA
hsa05205	Proteoglycans in cancer	4	93	92	2760	0.196293	0.402046	1.29032	P05106:ITGB3; P10398:ARAF; P07996:THBS1; P98160:HSPG2
hsa04933	AGE-RAGE signaling pathway in diabetic complications	2	93	46	2760	0.200732	0.406243	1.29032	P02462:COL4A1; P05121:SERPINE1
hsa05218	Melanoma	1	93	26	2760	0.217678	0.431775	1.14144	P10398:ARAF
hsa05235	PD-L1 expression and PD-1 checkpoint pathway in cancer	2	93	48	2760	0.218427	0.431775	1.23656	P25963:NFKBIA; Q15653:NFKBIB
hsa03460	Fanconi anemia pathway	1	93	27	2760	0.230258	0.44993	1.09916	Q0VG06:FAAP100
hsa04914	Progesterone-mediated oocyte maturation	2	93	50	2760	0.236438	0.452532	1.1871	Q7Z5Q1:CPEB2; P10398:ARAF
hsa04350	TGF-beta signaling pathway	1	93	28	2760	0.242887	0.452532	1.05991	P07996:THBS1
hsa04371	Apelin signaling pathway	2	93	51	2760	0.245542	0.452532	1.16382	Q14814:MEF2D; P05121:SERPINE1
hsa04668	TNF signaling pathway	2	93	51	2760	0.245542	0.452532	1.16382	P25963:NFKBIA; P17275:JUNB
hsa04926	Relaxin signaling pathway	2	93	52	2760	0.254704	0.452532	1.14144	P02462:COL4A1; P25963:NFKBIA
hsa04390	Hippo signaling pathway	2	93	52	2760	0.254704	0.452532	1.14144	Q66LE6:PPP2R2D; P05121:SERPINE1
hsa04660	T cell receptor signaling pathway	2	93	52	2760	0.254704	0.452532	1.14144	P25963:NFKBIA; Q15653:NFKBIB
hsa05213	Endometrial cancer	1	93	29	2760	0.255547	0.452532	1.02336	P10398:ARAF
hsa03022	Basal transcription factors	1	93	29	2760	0.255547	0.452532	1.02336	Q9Y6J9:TAF6L
hsa04150	mTOR signaling pathway	3	93	77	2760	0.259875	0.45545	1.15626	Q8NFG4:FLCN; Q13541:EIF4EBP1; Q15831:STK11
hsa03013	RNA transport	5	93	129	2760	0.266372	0.460585	1.15029	O15234:CASC3; Q9NWZ8:GEMIN8; Q13541:EIF4EBP1; Q96F07:CYFIP2; Q9HC62:SENP2
hsa04925	Aldosterone synthesis and secretion	1	93	30	2760	0.268223	0.460585	0.989247	P22736:NR4A1
hsa04611	Platelet activation	2	93	54	2760	0.27317	0.461991	1.09916	P05106:ITGB3; P02679:FGG
hsa05134	Legionellosis	1	93	31	2760	0.280899	0.461991	0.957336	P25963:NFKBIA
hsa00480	Glutathione metabolism	1	93	31	2760	0.280899	0.461991	0.957336	Q8TED1:GPX8
hsa04022	cGMP-PKG signaling pathway	2	93	55	2760	0.28246	0.461991	1.07918	Q14814:MEF2D; Q03113:GNA12
hsa05206	MicroRNAs in cancer	3	93	80	2760	0.28263	0.461991	1.1129	P00519:ABL1; P05106:ITGB3; P07996:THBS1
hsa04720	Long-term potentiation	1	93	32	2760	0.29356	0.475288	0.927419	P10398:ARAF
hsa04066	HIF-1 signaling pathway	2	93	57	2760	0.301124	0.478422	1.04131	Q13541:EIF4EBP1; P05121:SERPINE1
hsa04068	FoxO signaling pathway	2	93	57	2760	0.301124	0.478422	1.04131	P10398:ARAF; Q15831:STK11
hsa05164	Influenza A	3	93	83	2760	0.305691	0.48118	1.07268	P25963:NFKBIA; Q15653:NFKBIB; Q05823:RNASEL
hsa05214	Glioma	1	93	34	2760	0.318788	0.49638	0.872865	P10398:ARAF
hsa05161	Hepatitis B	3	93	85	2760	0.321187	0.49638	1.04744	P10398:ARAF; P25963:NFKBIA; P98160:HSPG2
hsa05223	Non-small cell lung cancer	1	93	35	2760	0.33133	0.507442	0.847926	P10398:ARAF
hsa04010	MAPK signaling pathway	4	93	114	2760	0.338798	0.512699	1.04131	P10398:ARAF; P22736:NR4A1; P28562:DUSP1; Q03113:GNA12
hsa03420	Nucleotide excision repair	1	93	36	2760	0.34381	0.512699	0.824373	Q13216:ERCC8
hsa04657	IL-17 signaling pathway	1	93	36	2760	0.34381	0.512699	0.824373	P25963:NFKBIA
hsa04064	NF-kappa B signaling pathway	1	93	37	2760	0.356218	0.519226	0.802092	P25963:NFKBIA
hsa05120	Epithelial cell signaling in Helicobacter pylori infection	1	93	37	2760	0.356218	0.519226	0.802092	P25963:NFKBIA
hsa04071	Sphingolipid signaling pathway	2	93	63	2760	0.35735	0.519226	0.94214	Q66LE6:PPP2R2D; Q03113:GNA12
hsa04550	Signaling pathways regulating pluripotency of stem cells	1	93	38	2760	0.368544	0.530953	0.780985	O43474:KLF4
hsa04145	Phagosome	2	93	65	2760	0.376022	0.537174	0.913151	P05106:ITGB3; P07996:THBS1
hsa03015	mRNA surveillance pathway	2	93	66	2760	0.385322	0.545873	0.899316	O15234:CASC3; Q66LE6:PPP2R2D
hsa05130	Pathogenic Escherichia coli infection	1	93	40	2760	0.392918	0.547509	0.741935	P00519:ABL1
hsa04620	Toll-like receptor signaling pathway	1	93	40	2760	0.392918	0.547509	0.741935	P25963:NFKBIA
hsa05224	Breast cancer	1	93	41	2760	0.404951	0.559689	0.723839	P10398:ARAF
hsa05226	Gastric cancer	1	93	42	2760	0.416872	0.566946	0.706605	P10398:ARAF
hsa01524	Platinum drug resistance	1	93	42	2760	0.416872	0.566946	0.706605	P11388:TOP2A
hsa04146	Peroxisome	1	93	44	2760	0.440354	0.584847	0.674487	P33897:ABCD1
hsa00190	Oxidative phosphorylation	2	93	72	2760	0.440355	0.584847	0.824373	Q9Y6N1:COX11; O75380:NDUFS6
hsa05225	Hepatocellular carcinoma	2	93	72	2760	0.440355	0.584847	0.824373	P10398:ARAF; P15559:NQO1
hsa01522	Endocrine resistance	1	93	45	2760	0.451905	0.586441	0.659498	P10398:ARAF
hsa05210	Colorectal cancer	1	93	45	2760	0.451905	0.586441	0.659498	P10398:ARAF
hsa05212	Pancreatic cancer	1	93	45	2760	0.451905	0.586441	0.659498	P10398:ARAF
hsa04910	Insulin signaling pathway	2	93	74	2760	0.458313	0.590252	0.802092	Q13541:EIF4EBP1; P10398:ARAF
hsa04015	Rap1 signaling pathway	2	93	75	2760	0.467204	0.592722	0.791398	P05106:ITGB3; P07996:THBS1
hsa05162	Measles	2	93	75	2760	0.467204	0.592722	0.791398	P25963:NFKBIA; Q15653:NFKBIB
hsa05231	Choline metabolism in cancer	1	93	47	2760	0.474601	0.597646	0.631434	Q13541:EIF4EBP1
hsa04931	Insulin resistance	1	93	48	2760	0.485739	0.6004	0.61828	P25963:NFKBIA
hsa04014	Ras signaling pathway	2	93	78	2760	0.493491	0.6004	0.760959	P00519:ABL1; P14921:ETS1
hsa05012	Parkinson disease	2	93	78	2760	0.493491	0.6004	0.760959	O75380:NDUFS6; Q99719:SEPTIN5
hsa04666	Fc gamma R-mediated phagocytosis	1	93	49	2760	0.496732	0.6004	0.605662	P53671:LIMK2
hsa04728	Dopaminergic synapse	1	93	49	2760	0.496732	0.6004	0.605662	Q66LE6:PPP2R2D
hsa05166	Human T-cell leukemia virus 1 infection	3	93	108	2760	0.497978	0.6004	0.824373	P14921:ETS1; O14786:NRP1; P25963:NFKBIA
hsa04140	Autophagy - animal	2	93	79	2760	0.502116	0.601124	0.751327	Q9H082:RAB33B; Q15831:STK11
hsa04261	Adrenergic signaling in cardiomyocytes	1	93	50	2760	0.507578	0.602871	0.593548	Q66LE6:PPP2R2D
hsa04530	Tight junction	2	93	80	2760	0.510667	0.602871	0.741935	Q66LE6:PPP2R2D; Q15831:STK11
hsa04625	C-type lectin receptor signaling pathway	1	93	51	2760	0.518273	0.603347	0.58191	P25963:NFKBIA
hsa05167	Kaposi sarcoma-associated herpesvirus infection	2	93	82	2760	0.527542	0.603347	0.723839	Q29983:MICA; P25963:NFKBIA
hsa04723	Retrograde endocannabinoid signaling	1	93	52	2760	0.528816	0.603347	0.57072	O75380:NDUFS6
hsa04310	Wnt signaling pathway	1	93	52	2760	0.528816	0.603347	0.57072	Q9HC62:SENP2
hsa04934	Cushing syndrome	1	93	52	2760	0.528816	0.603347	0.57072	P22736:NR4A1
hsa04072	Phospholipase D signaling pathway	1	93	53	2760	0.539204	0.611098	0.559951	Q03113:GNA12
hsa00230	Purine metabolism	1	93	54	2760	0.549436	0.618571	0.549582	O75356:ENTPD5
hsa04120	Ubiquitin mediated proteolysis	2	93	87	2760	0.568311	0.635611	0.68224	Q13216:ERCC8; P49427:CDC34
hsa05010	Alzheimer disease	2	93	90	2760	0.591737	0.657485	0.659498	P05067:APP; O75380:NDUFS6
hsa05170	Human immunodeficiency virus 1 infection	3	93	122	2760	0.596213	0.658157	0.729773	Q8N884:CGAS; P53671:LIMK2; P25963:NFKBIA
hsa05202	Transcriptional misregulation in cancer	1	93	60	2760	0.607491	0.66628	0.494624	Q13950:RUNX2
hsa04024	cAMP signaling pathway	1	93	61	2760	0.616605	0.671942	0.486515	P25963:NFKBIA
hsa05034	Alcoholism	1	93	63	2760	0.634353	0.686879	0.47107	P10398:ARAF
hsa04114	Oocyte meiosis	1	93	66	2760	0.659779	0.709889	0.449658	Q7Z5Q1:CPEB2
hsa04919	Thyroid hormone signaling pathway	1	93	67	2760	0.667939	0.714148	0.442947	P05106:ITGB3
hsa04141	Protein processing in endoplasmic reticulum	2	93	106	2760	0.702509	0.746416	0.559951	P33908:MAN1A1; Q9NRD1:FBXO6
hsa05169	Epstein-Barr virus infection	2	93	109	2760	0.720565	0.758948	0.54454	P25963:NFKBIA; Q15653:NFKBIB
hsa05016	Huntington disease	2	93	110	2760	0.726394	0.758948	0.539589	O75380:NDUFS6; P62875:POLR2L
hsa04210	Apoptosis	1	93	75	2760	0.727697	0.758948	0.395699	P25963:NFKBIA
hsa03010	Ribosome	2	93	112	2760	0.737773	0.759017	0.529954	Q7Z7H8:MRPL10; O75394:MRPL33
hsa04932	Non-alcoholic fatty liver disease (NAFLD)	1	93	77	2760	0.741157	0.759017	0.385421	O75380:NDUFS6
hsa05135	Yersinia infection	1	93	77	2760	0.741157	0.759017	0.385421	P25963:NFKBIA
hsa04110	Cell cycle	1	93	80	2760	0.760294	0.773952	0.370968	P00519:ABL1
hsa04714	Thermogenesis	2	93	120	2760	0.779632	0.788913	0.494624	Q9Y6N1:COX11; O75380:NDUFS6
hsa04144	Endocytosis	3	93	161	2760	0.802935	0.807686	0.552995	Q13636:RAB31; P34947:GRK5; Q7L804:RAB11FIP2
hsa05203	Viral carcinogenesis	1	93	125	2760	0.930604	0.930604	0.237419	P25963:NFKBIA
