# Supplementary material for: Integrated transcriptomic and proteomic profiling reveals the key molecular signatures of brain endothelial reperfusion injury
Source: Research Square preprint supplement (doi:10.21203/rs.3.rs-2216319/v1), 2022-11-02
Supplement: Supplementary file 5 [file cafc6c1b95b2e1ddd72e2f97.xlsx]

## Sheet: OGD-R vs. OGD
id	Symbol	Description	KEGG_A_class	KEGG_B_class	Pathway	K_ID	GO Component	GO Function	GO Process
ENSG00000100906	NFKBIA	-	Cellular Processes;Organismal Systems;Environmental Information Processing;Human Diseases	Endocrine and metabolic diseases;Nervous system;Cell growth and death;Infectious diseases;Cancers;Endocrine system;Signal transduction;Immune system;Development	ko05203//Viral carcinogenesis;ko05200//Pathways in cancer;ko05166//HTLV-I infection;ko05168//Herpes simplex infection;ko05169//Epstein-Barr virus infection;ko05164//Influenza A;ko05145//Toxoplasmosis;ko04024//cAMP signaling pathway;ko04062//Chemokine signaling pathway;ko04380//Osteoclast differentiation;ko05162//Measles;ko05161//Hepatitis B;ko05140//Leishmaniasis;ko05160//Hepatitis C;ko05142//Cha…	K04734	GO:0005623//cell;GO:0071944//cell periphery;GO:0044424//intracellular part;GO:0044444//cytoplasmic part;GO:0005829//cytosol;GO:0005737//cytoplasm;GO:0005886//plasma membrane;GO:0016020//membrane;GO:0043234//protein complex;GO:0043226//organelle;GO:0005575//cellular_component;GO:0032991//macromolecular complex;GO:0043229//intracellular organelle;GO:0043227//membrane-bounded organelle;GO:0005634//n…	GO:0005488//binding;GO:0008134//transcription factor binding;GO:0003674//molecular_function;GO:0005515//protein binding;GO:0019899//enzyme binding	GO:0050789//regulation of biological process;GO:0044763//single-organism cellular process;GO:0044419//interspecies interaction between organisms;GO:0007154//cell communication;GO:0008150//biological_process;GO:0008219//cell death;GO:0051179//localization;GO:0009987//cellular process;GO:0045184//establishment of protein localization;GO:0033036//macromolecule localization;GO:0071702//organic substa…
ENSG00000120129	DUSP1	dual specificity phosphatase 1 [Source:HGNC Symbol;Acc:3064]	Organismal Systems;Environmental Information Processing	Nervous system;Signal transduction	ko04010//MAPK signaling pathway;ko04726//Serotonergic synapse	K04459	GO:0044424//intracellular part;GO:0005622//intracellular;GO:0043227//membrane-bounded organelle;GO:0044422//organelle part;GO:0005623//cell;GO:0044464//cell part;GO:0043231//intracellular membrane-bounded organelle;GO:0005654//nucleoplasm;GO:0043233//organelle lumen;GO:0031974//membrane-enclosed lumen;GO:0070013//intracellular organelle lumen;GO:0044446//intracellular organelle part;GO:0031981//n…	GO:0016787//hydrolase activity;GO:0016788//hydrolase activity, acting on ester bonds;GO:0003674//molecular_function;GO:0003824//catalytic activity;GO:0042578//phosphoric ester hydrolase activity;GO:0016791//phosphatase activity	GO:0044238//primary metabolic process;GO:0044767//single-organism developmental process;GO:0043412//macromolecule modification;GO:0044699//single-organism process;GO:0036211//protein modification process;GO:0032501//multicellular organismal process;GO:0032502//developmental process;GO:0007049//cell cycle;GO:0008152//metabolic process;GO:0009790//embryo development;GO:0044267//cellular protein met…
ENSG00000123358	NR4A1	nuclear receptor subfamily 4, group A, member 1 [Source:HGNC Symbol;Acc:7980]	Organismal Systems;Environmental Information Processing	Signal transduction;Endocrine system	ko04151//PI3K-Akt signaling pathway;ko04010//MAPK signaling pathway;ko04925//Aldosterone synthesis and secretion	K04465	GO:0070013//intracellular organelle lumen;GO:0043227//membrane-bounded organelle;GO:0043234//protein complex;GO:0005575//cellular_component;GO:0005634//nucleus;GO:0043233//organelle lumen;GO:0043231//intracellular membrane-bounded organelle;GO:0044428//nuclear part;GO:0031981//nuclear lumen;GO:0031974//membrane-enclosed lumen;GO:0044464//cell part;GO:0044422//organelle part;GO:0005623//cell;GO:00…	GO:0003676//nucleic acid binding;GO:1901363//heterocyclic compound binding;GO:0043167//ion binding;GO:0005488//binding;GO:0004871//signal transducer activity;GO:0003677//DNA binding;GO:0003674//molecular_function;GO:0097159//organic cyclic compound binding;GO:0001071//nucleic acid binding transcription factor activity	GO:0006950//response to stress;GO:0006928//movement of cell or subcellular component;GO:0009987//cellular process;GO:0051716//cellular response to stimulus;GO:0023052//signaling;GO:0044699//single-organism process;GO:0008152//metabolic process;GO:0007154//cell communication;GO:0008219//cell death;GO:0006807//nitrogen compound metabolic process;GO:0007165//signal transduction;GO:0002376//immune sy…
ENSG00000106366	SERPINE1	serpin peptidase inhibitor, clade E (nexin, plasminogen activator inhibitor type 1), member 1 [Source:HGNC Symbol;Acc:8583]	Cellular Processes;Organismal Systems;Environmental Information Processing;Human Diseases	Cell growth and death;Immune system;Signal transduction;Infectious diseases	ko04390//Hippo signaling pathway;ko05142//Chagas disease (American trypanosomiasis);ko04610//Complement and coagulation cascades;ko04066//HIF-1 signaling pathway;ko04115//p53 signaling pathway	K03982	GO:0044464//cell part;GO:0016023//cytoplasmic, membrane-bounded vesicle;GO:0043229//intracellular organelle;GO:0043227//membrane-bounded organelle;GO:0005576//extracellular region;GO:0071944//cell periphery;GO:0005737//cytoplasm;GO:0043231//intracellular membrane-bounded organelle;GO:0043226//organelle;GO:0005886//plasma membrane;GO:0044421//extracellular region part;GO:0097708//intracellular ves…	GO:0030234//enzyme regulator activity;GO:0003674//molecular_function;GO:0005515//protein binding;GO:0019899//enzyme binding;GO:0005488//binding;GO:0098772//molecular function regulator	GO:0051716//cellular response to stimulus;GO:0016043//cellular component organization;GO:0006950//response to stress;GO:0007165//signal transduction;GO:0007568//aging;GO:0065007//biological regulation;GO:0051234//establishment of localization;GO:0016192//vesicle-mediated transport;GO:0030198//extracellular matrix organization;GO:0008150//biological_process;GO:0043062//extracellular structure orga…
ENSG00000137801	THBS1	thrombospondin 1 [Source:HGNC Symbol;Acc:11785]	Cellular Processes;Environmental Information Processing;Human Diseases	Cellular commiunity;Cell growth and death;Signal transduction;Infectious diseases;Transport and catabolism;Cancers;Signaling molecules and interaction	ko04151//PI3K-Akt signaling pathway;ko04145//Phagosome;ko04510//Focal adhesion;ko04015//Rap1 signaling pathway;ko05205//Proteoglycans in cancer;ko05206//MicroRNAs in cancer;ko04512//ECM-receptor interaction;ko04350//TGF-beta signaling pathway;ko04115//p53 signaling pathway;ko05144//Malaria;ko05219//Bladder cancer	K16857	GO:0043227//membrane-bounded organelle;GO:0044464//cell part;GO:0043231//intracellular membrane-bounded organelle;GO:0005886//plasma membrane;GO:0005783//endoplasmic reticulum;GO:0044424//intracellular part;GO:0032991//macromolecular complex;GO:0016023//cytoplasmic, membrane-bounded vesicle;GO:0044421//extracellular region part;GO:0005575//cellular_component;GO:0031410//cytoplasmic vesicle;GO:000…	GO:0005488//binding;GO:0008289//lipid binding;GO:0043167//ion binding;GO:0003674//molecular_function	GO:0006950//response to stress;GO:0016192//vesicle-mediated transport;GO:0030198//extracellular matrix organization;GO:0061024//membrane organization;GO:0051179//localization;GO:0006464//cellular protein modification process;GO:0044763//single-organism cellular process;GO:0032502//developmental process;GO:0040007//growth;GO:0043170//macromolecule metabolic process;GO:0002376//immune system proces…
ENSG00000171223	JUNB	jun B proto-oncogene [Source:HGNC Symbol;Acc:6205]	Organismal Systems;Environmental Information Processing	Signal transduction;Development	ko04380//Osteoclast differentiation;ko04668//TNF signaling pathway	K09028	GO:0070013//intracellular organelle lumen;GO:0031974//membrane-enclosed lumen;GO:0031981//nuclear lumen;GO:0043226//organelle;GO:0043229//intracellular organelle;GO:0005634//nucleus;GO:0043227//membrane-bounded organelle;GO:0044422//organelle part;GO:0005694//chromosome;GO:0044424//intracellular part;GO:0043228//non-membrane-bounded organelle;GO:0043231//intracellular membrane-bounded organelle;G…	GO:0001071//nucleic acid binding transcription factor activity;GO:0003676//nucleic acid binding;GO:0097159//organic cyclic compound binding;GO:0003677//DNA binding;GO:0003674//molecular_function;GO:0005488//binding;GO:1901363//heterocyclic compound binding;GO:0000988//transcription factor activity, protein binding	GO:0048856//anatomical structure development;GO:0009653//anatomical structure morphogenesis;GO:0034641//cellular nitrogen compound metabolic process;GO:0065007//biological regulation;GO:0002376//immune system process;GO:0048869//cellular developmental process;GO:0051716//cellular response to stimulus;GO:0044699//single-organism process;GO:0030154//cell differentiation;GO:0007154//cell communicati…
